# Supplementary material for: Proteomic View of Interactions of Shiga Toxin-Producing Escherichia coli with the Intestinal Environment in Gnotobiotic Piglets
Source: PLoS One. 2013 Jun 19;8(6):e66462. doi: 10.1371/journal.pone.0066462 (PMC3686733; doi:10.1371/journal.pone.0066462)
Supplement: Dataset S2 — Protein abundance differences comparing EHEC strain 86–24 cells isolated from a piglet subgroup positive for hemoglobin versus a piglet subgroup negative for hemoglobin. This Table includes data from a shotgun proteomics analysis computing protein values using the APEX Quantitative Proteomics Tool. Detailed legends are provided in the 1st worksheet of the dataset. (XLSX) [file pone.0066462.s003.xlsx]

## Sheet: Legend Dataset S2
Dataset S2
Protein abundance differences comparing EHEC strain 86-24 cells isolated from a piglet subgroup positive for hemoglobin versus a piglet subgroup negative for hemoglobin.
This Table includes data from a shotgun proteomics analysis computing protein values using the APEX Quantitative Proteomics Tool.
column A: Genbank accession number in NCBI - Escherichia coli O157:H7 EDL933 protein sequence database (chromosome and pO157 plasmid).
column B: Locus tag - Escherichia coli O157:H7 EDL933 protein sequence database (chromosome and pO157 plasmid).
column C: Gene name - Escherichia coli O157:H7 EDL933 protein sequence database (chromosome and pO157 plasmid); updated gene names/synonyms have been added from the respective Uniprot datbase or the EcoCyc database entries.
column D: MW - relative molecular weight of protein (mass units).
column E: pI - isoelectric point of protein.
column F: Protein description - descriptions from EDL933 genome database; more informative description may have been added from the respective Uniprot datbase or the EcoCyc database entries.
column G: Functional category - protein functional categories were obtained from extensive data mining in the Uniprot and EcoCyc databases and the general E. coli literature; to sort the data, one functional category was selected if a protein was assigned two or more functions; a question mark indicates that a function was tentatively assigned.
column H: Transcriptional control - transcriptional control data were derived from the Uniprot and EcoCyc databases; + indicates positive control (gene expression induction); - indicates negative control (gene expression repression); gene-specific regulators are generally not included.
column I: PSORTb subcellular localization - subcellular localizations of proteins were derived from assignments by the PSORTb algorithms (http://www.psort.org/psortb/).
column J: Main functional role - functional role categories for proteins according to the GO ontology.
column K: Group 1 "E265-6" - APEXi protein quantity averages for the hemoglobin-negative in vivo sample subgroup (no hemoglobin was identified searching the LC-MS/MS data with the Sus scrofa protein sequence database; HB- group); using the APEX Quantitative Proteomics Tool, a total protein count per cell of 2.5 million was used determine the individual protein's APEXi value; in vitro cell culture…
column L: Group 2 "E266-6 and E267-6" - APEXi protein quantity averages for the hemoglobin-positive in vivo sample subgroup (hemoglobin was identified searching the LC-MS/MS data with the Sus scrofa protein sequence database; HB+ group); using the APEX Quantitative Proteomics Tool, a total protein count per cell of 2.5 million was used determine the individual protein's APEXi value; in vitro cell…
column M: Group 1 / group 2 - the quotient of the APEXi values in column K over column L.
column N: Group 2 / group 1 - the quotient of the APEXi values in column L over column K.
column O: W - W value of the non-parametric two-sample Wilcoxon Rank Sum test used to determine proteins differentially abundant in group 2 versus group 1 with statistical significance
column P: W* - W* value of the non-parametric two-sample Wilcoxon Rank Sum test used to determine proteins differentially abundant in group 2 versus group 1 with statistical significance
column Q: P-value - the probability of obtaining a test statistic at least as extreme as the one that was actually observed, assuming that the null hypothesis is true (Wilcoxon Rank Sum test)
column R: In vitro APEXi quantities (from Dataset S1) - the average protein quantity using quantification by the APEX Quantitative Proteomics Tool and a total protein count per cell of 2.5 million; all cell culture sample proteomic datasets (n=11).
column S: In vivo APEXi quantities (from Dataset S1) - the average protein quantity using quantification by the APEX Quantitative Proteomics Tool and a total protein count per cell of 2.5 million; all in vivo sample proteomic datasets (n=7).
column T: Ratio in vivo / in vitro (from Dataset S1) - the quotient of the APEXi values in column S over column R.
column U-X: AF: ivv. E265-6 …… - APEXi values for 4 in vivo samples (HB- group).
column V-AA: AM: ivv. E266-6/E267-6 ….. - - APEXi values for 4 in vivo samples (HB+ group).

## Sheet: in vv HB- vs in vv HB+ 
Protein General Information										APEX: HB-	APEX: HB+						In vitro vs in vivo (for comparison, see Dataset S1)			APEX: HB-				APEX: HB+
gi| Acc. No.	Locus tag	Gene name	MW	pI	Protein description	Functionional category	Transcriptional control	PSortB subcellular localization	Main functional role	group 1 Avg E-265-6 (n=4)	group 2 Avg E-266-6 and E-267-6 (n=3)	Ratio Avg gr.1/gr.2	Ratio Avg gr.2/gr.1	W	W*	p-value	in vitro APEXi quantities, Avg. of 11	in vivo APEXi quantities, Avg. of 7	Ratio: in vivo versus in vitro	ivv. E265-6 100318	ivv. E265-6 100402	ivv. E265-6 100324	ivv. E265-6 100710	ivv. E266-6 100414	ivv. E267-6 100419	ivv. E267-6 100718
15802833	Z3545	nuoC	68678.1	6.05	bifunctional NADH:ubiquinone oxidoreductase subunit C/D	aerobic EM: electron transport chain	Fis+,NarL+,ArcA-,Fnr-	Cytoplasmic	Energy metabolism	1050	1998.33	0.525438	1.90317	18	2.12132	0.0338948	2700.2	1456.39	0.54	1130	1379	551	1140	2739	1728	1528
15800475	Z0936	ybhA	30259.2	5.42	pyridoxal phosphatase / fructose 1,6-bisphosphatase	aerobic EM: gluconeogenesis	Crp+	Cytoplasmic	Central intermediary metabolism	1	869.333	0.00115031	869.333	18	2.34057	0.0192544	441.65	372.48	0.84	1	1	1	1	2137	237	234
15802114	Z2731	ppsA	87426.6	4.96	phosphoenolpyruvate synthase	aerobic EM: gluconeogenesis	PpsR+	Cytoplasmic	Energy metabolism	1742	3930	0.443257	2.25603	18	2.12132	0.0338948	8808.71	2679.63	0.3	1511	1907	2586	964	4600	4014	3176
15801728	Z2306	aldA	52236.7	5.07	lactaldehyde/glyceraldehyde dehydrogenase	aerobic EM: glycerol metabolism	Crp+,ArcA-,Fnr-	Cytoplasmic	Energy metabolism	397.5	1456	0.273008	3.66289	18	2.12132	0.0338948	6006.93	851.03	0.14	247	471	753	119	1769	1271	1328
15802788	Z3497	glpQ	40854.8	5.44	glycerophosphodiester phosphodiesterase	aerobic EM: glycerol metabolism	Crp+,Fis+,Fnr+	Periplasmic	Central intermediary metabolism	6831.75	9680	0.705759	1.41691	18	2.12132	0.0338948	11627.7	8052.38	0.69	6788	7324	7212	6003	8285	11283	9472
15803933	Z4786	glpD	56736.2	7.27	glycerol-3-phosphate dehydrogenase	aerobic EM: glycerol metabolism	Crp+,ArcA-	Cytoplasmic	Energy metabolism	7210.5	10233	0.704632	1.41918	18	2.12132	0.0338948	14379.7	8506	0.59	7803	7361	7541	6137	9329	10117	11253
15804515	Z5471	glpK	56974.4	5.36	glycerol kinase	aerobic EM: glycerol metabolism	Crp+	Cytoplasmic	Energy metabolism	6950.25	12044.7	0.57704	1.73298	18	2.12132	0.0338948	32417.5	9133.6	0.28	7688	7466	7622	5025	13072	11083	11979
15799800	Z0126	lpdA	50686.6	5.79	dihydrolipoamide dehydrogenase	aerobic EM: TCA cycle	Fis+,ArcA-,FruR-	Cytoplasmic	Energy metabolism	4531.75	6342	0.714562	1.39946	18	2.12132	0.0338948	10609.2	5307.56	0.5	4427	4646	4720	4334	4968	5705	8353
15799802	Z0128	acnB	93480.3	5.24	bifunctional aconitate hydratase 2/2-methylisocitrate dehydratase	aerobic EM: TCA cycle	Crp+,ArcA-,FruF-	Cytoplasmic	Energy metabolism	1182.25	2597.67	0.45512	2.19722	18	2.12132	0.0338948	10264	1789	0.17	1265	1069	1211	1184	2882	2500	2411
15800424	Z0873	gltA	47970.8	6.15	type II citrate synthase	aerobic EM: TCA cycle	Crp+,ArcA-	Cytoplasmic	Energy metabolism	2367.75	6229	0.380117	2.63077	18	2.12132	0.0338948	21735.4	4022.61	0.19	2055	2240	3269	1907	5611	6305	6771
15800426	Z0876	sdhD	12823.1	7.9	succinate dehydrogenase cytochrome b556 small membrane subunit	aerobic EM: TCA cycle	Crp+,Fur+, Fnr-	Cytoplasmic Membrane	Energy metabolism	1090.5	7023.67	0.155261	6.44078	18	2.14052	0.0323129	9420.64	3632.77	0.39	1017	3343	1	1	6761	6980	7330
15800427	Z0877	sdhA	64409.1	5.91	succinate dehydrogenase flavoprotein subunit	aerobic EM: TCA cycle	Crp+,Fur+, Fnr-	Cytoplasmic Membrane	Energy metabolism	1755	4964	0.353546	2.82849	18	2.12132	0.0338948	14936.5	3130.38	0.21	1667	2051	2259	1043	6043	5270	3579
15800428	Z0878	sdhB	26782.9	6.32	succinate dehydrogenase iron-sulfur subunit	aerobic EM: TCA cycle	Crp+,Fur+, Fnr-	Cytoplasmic Membrane	Energy metabolism	2148.25	6362.33	0.337651	2.96164	18	2.12132	0.0338948	12637.9	3954.3	0.31	2850	2504	2615	624	8000	6757	4330
15800430	Z0880	sucA	105063	6.04	alpha-ketoglutarate decarboxylase	aerobic EM: TCA cycle	Crp+,Fur+, Fnr-	Cytoplasmic	Energy metabolism	911.5	2397.33	0.380214	2.6301	18	2.12132	0.0338948	11180.8	1548.35	0.14	1381	775	963	527	2765	2542	1885
15800431	Z0881	sucB	44009.5	5.58	dihydrolipoamide acetyltransferase	aerobic EM: TCA cycle	Crp+,Fur+, Fnr-	Cytoplasmic	Energy metabolism	3495.75	6348.67	0.550627	1.81611	18	2.12132	0.0338948	13293.6	4718.33	0.35	3899	3483	3803	2798	6442	5578	7026
15800432	Z0882	sucC	41391.1	5.37	succinyl-CoA synthetase subunit beta	aerobic EM: TCA cycle	Crp+,Fur+, Fnr-	Cytoplasmic	Energy metabolism	2541.5	5669.67	0.448263	2.23083	18	2.12132	0.0338948	15709.7	3882.09	0.25	2276	2776	2643	2471	6210	5471	5328
15800433	Z0883	sucD	29776.3	6.32	succinyl-CoA synthetase subunit alpha	aerobic EM: TCA cycle	Crp+,Fur+, Fnr-	Cytoplasmic	Energy metabolism	2207	7089	0.311327	3.21205	18	2.12132	0.0338948	21977.9	4299.29	0.2	1934	2355	2774	1765	8396	6465	6406
15801333	Z1865	icdA	45769.1	5.22	isocitrate dehydrogenase	aerobic EM: TCA cycle	FruR+,ArcA-	Cytoplasmic	Energy metabolism	3081.25	6588.67	0.467659	2.13831	18	2.12132	0.0338948	21055.3	4584.58	0.22	2504	3162	3623	3036	5015	7584	7167
15801901	Z2532	acnA	97655.3	5.55	aconitate hydratase	aerobic EM: TCA cycle	FruR+,Crp+,ArcA-,Fnr-	Cytoplasmic	Energy metabolism	44.5	252	0.176587	5.66292	18	2.14052	0.0323129	2075.07	133.21	0.06	72	104	1	1	358	213	185
15803770	Z4595	mdh	32336	5.61	malate dehydrogenase	aerobic EM: TCA cycle	Crp+,ArcA-	Unknown/Multiple Localization	Energy metabolism	5249.75	9213.67	0.569779	1.75507	18	2.12132	0.0338948	16705.3	6948.59	0.42	5542	4761	5631	5065	9158	11280	7203
15804601	Z5601	aceA	48202.1	5.1	isocitrate lyase	aerobic EM: TCA cycle	FruR+,ArcA-	Cytoplasmic	Energy metabolism	67.75	1078.67	0.062809	15.9213	18	2.14052	0.0323129	5675.88	500.71	0.09	162	1	107	1	1520	636	1080
15804335	Z5233	atpH	19331.4	4.94	F0F1 ATP synthase subunit delta	aerobic/anaerobic EM: ATP synthesis		Cytoplasmic	Energy metabolism	3509.75	2284.33	1.53644	0.650854	6	-2.12132	0.0338948	3382.48	2984.46	0.88	3745	3401	3664	3229	2063	2447	2343
161367630	Z1048	mipB/fsaA	23112	6.3	fructose-6-phosphate aldolase	aerobic/anaerobic EM: glycolysis		Cytoplasmic	Energy metabolism	9360	3354	2.7907	0.358333	6	-2.12132	0.0338948	41.46	6785.88	163.66	9982	10525	10687	6246	2483	3787	3792
15803300	Z4094	eno	45608.8	5.32	phosphopyruvate hydratase	aerobic/anaerobic EM: glycolysis	FruR-	Cytoplasmic	Energy metabolism	13527.8	10049.3	1.34613	0.742868	6	-2.12132	0.0338948	5656.96	12036.9	2.13	12086	12740	14950	14335	8539	11587	10022
15804846	Z5866	argI	36887.7	5.45	ornithine carbamoyltransferase subunit I	amino acid BS: arginine	DksA+	Cytoplasmic	Amino acid biosynthesis	1590.25	2387.67	0.666027	1.50144	18	2.12132	0.0338948	40.09	1932.12	48.2	1371	1149	2000	1841	2208	2687	2268
15802172	Z2793	gdhA	48567.4	5.98	glutamate dehydrogenase	amino acid BS: glutamate/glutamine	Fnr+,Crp-	Outer Membrane	Amino acid biosynthesis	1555	4050.67	0.383887	2.60493	18	2.12132	0.0338948	2452.29	2624.55	1.07	1376	1724	1585	1535	4548	3236	4368
15801003	Z1513	putA	143771	5.58	trifunctional transcriptional regulator/proline dehydrogenase/pyrroline-5-carboxylate dehydrogenase	amino acid BS: glutamate/proline	MarA+	Cytoplasmic	Energy metabolism	328.75	1214	0.270799	3.69278	18	2.12132	0.0338948	899.16	708.07	0.79	385	450	373	107	1698	1268	676
15802500	Z3183	hisC	39386.7	5.02	histidinol-phosphate aminotransferase	amino acid BS: histidine	ppGpp-DksA+	Cytoplasmic	Amino acid biosynthesis	347.25	703.333	0.49372	2.02544	18	2.12132	0.0338948	249.9	499.82	2	291	422	394	282	854	760	496
15802504	Z3187	hisF	28453.4	5.03	imidazole glycerol phosphate synthase subunit HisF	amino acid BS: histidine	ppGpp-DksA+	Cytoplasmic	Amino acid biosynthesis	674	1489.33	0.452551	2.20969	18	2.12132	0.0338948	1132.34	1023.11	0.9	1019	707	251	719	1225	1725	1518
15804361	Z5281	ilvE	34092.3	5.54	branched-chain amino acid aminotransferase	amino acid BS: isoleucine/valine/leucine	Lrp-,leuLrp-	Cytoplasmic	Amino acid biosynthesis	1405.75	2312.67	0.607848	1.64515	18	2.12132	0.0338948	1071.96	1794.48	1.67	1313	1951	970	1389	2761	2222	1955
15804362	Z5282	ilvD	65572.9	5.59	dihydroxy-acid dehydratase	amino acid BS: isoleucine/valine/leucine	Lrp-,leuLrp-	Cytoplasmic	Amino acid biosynthesis	675.5	881.333	0.766452	1.30471	18	2.12132	0.0338948	412.68	763.6	1.85	554	549	818	781	832	987	825
15804421	Z5351	metE	84719.4	5.56	5-methyltetrahydropteroyltriglutamate--homocysteine methyltransferase	amino acid BS: methionine	MetR	Cytoplasmic	Amino acid biosynthesis	221.75	1114	0.199057	5.02368	18	2.12132	0.0338948	421.93	604.12	1.43	148	269	469	1	1525	1260	557
15804605	Z5610	metH	136035	4.97	B12-dependent methionine synthase	amino acid BS: methionine	Fur-	Cytoplasmic	Amino acid biosynthesis	103	360	0.286111	3.49515	18	2.12132	0.0338948	392.85	213.15	0.54	22	159	66	165	590	191	299
15800768	Z1253	serC	39852.8	5.49	phosphoserine aminotransferase	amino acid BS: serine	leuLrp+,Crp-	Cytoplasmic	Amino acid biosynthesis	2231.5	3503.33	0.636965	1.56995	18	2.12132	0.0338948	1891.6	2776.51	1.47	1528	1744	2760	2894	3287	3423	3800
15803448	Z4251	serA	44174.1	5.92	D-3-phosphoglycerate dehydrogenase	amino acid BS: serine	Crp+,Lrp+,leuLrp-	Cytoplasmic	Amino acid biosynthesis	5760	7579.33	0.759961	1.31586	18	2.12132	0.0338948	2161.31	6539.81	3.03	5868	5802	5889	5481	8380	7348	7010
15804617	Z5622	lysC	48515.8	5.02	aspartate kinase III	amino acid BS: threonine		Unknown/Multiple Localization	Amino acid biosynthesis	529.25	267.333	1.97974	0.505117	6	-2.12132	0.0338948	15.7	416.98	26.57	489	762	459	407	385	274	143
15802876	Z3592	aroC	39149.9	5.81	chorismate synthase	amino acid BS: tryptophan		Cytoplasmic	Amino acid biosynthesis	1	225.667	0.00443131	225.667	18	2.34057	0.0192544	198.45	96.83	0.49	1	1	1	1	415	173	89
15800894	Z1390	hyaB	66279.9	5.68	hydrogenase 1 large subunit HyaB	anaerobic EM: electron transport chain	Fnr+,NarL-	Cytoplasmic Membrane	Energy metabolism	471	91	5.17582	0.193206	6	-2.14052	0.0323129	0	307.84	0	442	642	466	334	271	1	1
15803541	Z4350	hybA	36006.5	7.1	hydrogenase 2 protein HybA	anaerobic EM: electron transport chain	NarL-,ArcA-	Cytoplasmic Membrane	Energy metabolism	332	861	0.385598	2.59337	18	2.12132	0.0338948	66.32	558.68	8.42	397	500	430	1	1313	701	569
15801467	Z2016	adhE	96171	6.32	bifunctional acetaldehyde-CoA/alcohol dehydrogenase	anaerobic EM: mixed acid fermentation	Fnr+,FruR-,NarL-	Cytoplasmic	Energy metabolism	18332.5	10498.7	1.74617	0.572681	6	-2.12132	0.0338948	849.62	14975.1	17.63	19269	18968	13963	21130	7823	10472	13201
15802844	Z3559	pta	77154.9	5.28	phosphate acetyltransferase	anaerobic EM: mixed acid fermentation	CreB+	Unknown	Energy metabolism	7152.75	7783.33	0.918983	1.08816	18	2.12132	0.0338948	3910.34	7423.02	1.9	7095	7175	7261	7080	7591	7553	8206
15804747	Z5760	frdB	27122	6.07	fumarate reductase iron-sulfur subunit	anaerobic EM: mixed acid fermentation		Cytoplasmic Membrane	Energy metabolism	5171	6744.67	0.76668	1.30433	18	2.12132	0.0338948	2264.93	5845.44	2.58	5352	5145	4691	5496	6242	7867	6125
15800073	Z0440	lacZ	116405	5.2	beta-D-galactosidase	carbohydrate metabolism	LacI-,HNS-	Unknown	Unclassified	22346.2	14378	1.5542	0.643419	6	-2.12132	0.0338948	58.77	18931.2	322.13	22102	21823	27789	17671	11275	15823	16036
15800466	Z0927	galK	41504.2	5.28	galactokinase	carbohydrate metabolism		Cytoplasmic	Energy metabolism	6264	4245.33	1.4755	0.677735	6	-2.12132	0.0338948	1036.71	5398.82	5.21	5512	5025	5791	8728	3594	4189	4953
15801150	Z1666	ghrA/ycdW	36852.8	6.76	glyoxylate reductase / hydroxypyruvate reductase	carbohydrate metabolism		Cytoplasmic	Central intermediary metabolism	91.5	465.333	0.196633	5.08561	18	2.14052	0.0323129	830.83	251.58	0.3	248	116	1	1	410	608	378
15802682	Z3381	bglX	83484.2	5.95	beta-D-glucoside glucohydrolase	carbohydrate metabolism		Periplasmic	Energy metabolism	50.25	150.667	0.333518	2.99834	18	2.12132	0.0338948	317.23	92.96	0.29	29	73	1	98	148	132	172
15802840	Z3554	yfbT	23024.6	5.63	sugar phosphatase	carbohydrate metabolism		Cytoplasmic	Unknown function	1024.25	129	7.93992	0.125946	6	-2.14052	0.0323129	698	640.25	0.92	942	821	1787	547	1	1	385
75994515	L7069	sopB	35370.8	7.7	plasmid-partitioning protein	cell division		Cytoplasmic	No Data	85.5	797.333	0.107232	9.32554	18	2.14052	0.0323129	902.25	390.23	0.43	1	241	99	1	1337	744	311
15799778	Z0104	ftsA	45328.3	5.84	cell division protein FtsA	cell division	RcsB+,LexA-	Cytoplasmic	Cellular processes	1	265.667	0.00376412	265.667	18	2.34057	0.0192544	471.43	113.78	0.24	1	1	1	1	483	203	111
15803718	Z4540	hflB	70689.2	5.91	ATP-dependent metalloprotease	cell division		Cytoplasmic Membrane	Cellular processes	1046.75	573	1.82679	0.547409	6	-2.12132	0.0338948	775.12	843.7	1.09	1188	890	956	1153	859	328	532
15804100	Z4979	yiaF	30157.4	9.35	conserved protein YiaF	cell division		Unknown	Cell envelope	1151.25	417.333	2.75859	0.362505	6	-2.12132	0.0338948	671.5	836.62	1.25	1490	1299	805	1011	656	292	304
15801396	Z1936	minE	10234.6	5.15	cell division topological specificity factor MinE	cell division		Cytoplasmic	Cellular processes	1012.25	2362.33	0.428496	2.33374	18	2.12132	0.0338948	2579.95	1590.77	0.62	934	1017	1012	1086	2263	3294	1530
15801015	Z1526	pgaA	92209.2	6.12	poly-beta-1,6-N-acetyl-D-glucosamine export protein	cell envelope: capsular polysaccharides	CsrA+	Unknown	Energy metabolism	159.25	35	4.55	0.21978	6	-2.14052	0.0323129	0	105.8	0	236	147	105	149	1	1	103
15799780	Z0106	lpxC	33954.6	5.54	UDP-3-O-[3-hydroxymyristoyl] N-acetylglucosamine deacetylase	cell envelope: lipid A core biosynthesis	LexA-	Cytoplasmic	Cell envelope	1	273.333	0.00365854	273.333	18	2.34057	0.0192544	668.97	117.26	0.18	1	1	1	1	516	114	190
15800779	Z1264	kdsB	27608.4	5.42	3-deoxy-manno-octulosonate cytidylyltransferase	cell envelope: lipid A core biosynthesis		Cytoplasmic	Cell envelope	430.5	968.333	0.444578	2.24932	18	2.12132	0.0338948	680.57	660.84	0.97	424	308	577	413	625	973	1307
15802513	Z3197	fcI	36267.2	6.89	fucose synthetase	cell envelope: O-antigen biosynthesis		Cytoplasmic	Cell envelope	395.5	1214	0.325783	3.06953	18	2.12132	0.0338948	1334.83	746.32	0.56	1	625	622	334	2150	787	705
15802514	Z3198	gmd2	41672.7	5.56	GDP-mannose dehydratase	cell envelope: O-antigen biosynthesis		Cytoplasmic	Cell envelope	3618.5	2497	1.44914	0.690065	6	-2.12132	0.0338948	3158.12	3137.79	0.99	3873	3848	3549	3204	3012	1563	2916
15800526	Z0994	bioB	38626.4	5.42	biotin synthase	cofactor biosynthesis		Unknown	Biosynthesis of cofactors, prosthetic groups, and carriers	1	462.333	0.00216294	462.333	18	2.34057	0.0192544	0	198.11	0	1	1	1	1	1191	176	20
15803057	Z3797	iscS	46059.9	6.04	cysteine desulfurase	cofactor biosynthesis	srRNA-	Cytoplasmic	Biosynthesis of cofactors, prosthetic groups, and carriers	791.75	1377.33	0.574843	1.73961	18	2.12132	0.0338948	1454.24	1042.85	0.72	672	932	911	652	1817	1377	938
161367664	L7056	repFIB	37234.4	9.69	replication protein	DNA replication and repair		Cytoplasmic	No Data	1	278.333	0.00359281	278.333	18	2.34057	0.0192544	75.04	119.22	1.59	1	1	1	1	561	222	52
15800242	Z0660	allR	29268.6	5.77	DNA-binding transcriptional repressor AllR	gene expression regulation		Unknown	Energy metabolism	91.25	285.667	0.319428	3.13059	18	2.12132	0.0338948	290.75	174.37	0.6	121	132	1	111	134	358	365
15801834	Z2433	fnr	27966.2	8.25	fumarate/nitrate reduction transcriptional regulator	gene expression regulation		Cytoplasmic	Regulatory functions	1	260.333	0.00384123	260.333	18	2.34057	0.0192544	359.95	111.63	0.31	1	1	1	1	340	295	146
15802124	Z2741	ihfA	11353.5	9.34	integration host factor subunit alpha	gene expression regulation	DksA-	Cytoplasmic	DNA metabolism	1738.25	3777.33	0.460179	2.17307	18	2.12132	0.0338948	4201.96	2612.23	0.62	2434	2476	1099	944	3397	4612	3323
15802912	Z3631	evgA	22695.1	6.83	DNA-binding transcriptional activator EvgA	gene expression regulation		Cytoplasmic	Regulatory functions	1	195.667	0.00511073	195.667	18	2.34057	0.0192544	653.4	83.84	0.13	1	1	1	1	366	108	113
15803210	Z3998	csrA	6855.67	8.16	carbon storage regulator CsrA	gene expression regulation		Unknown	Energy metabolism	1025.25	3267	0.31382	3.18654	18	2.12132	0.0338948	1883.85	1985.91	1.05	1598	1745	1	757	2205	4316	3280
75994477	L7031	stcE	99544.6	6.39	putative StcE metalloprotease	interactions with host environment	Ler+	Extracellular	No Data	149.75	1961.33	0.0763511	13.0974	18	2.12132	0.0338948	1862.98	926.01	0.5	161	219	218	1	3148	1459	1277
75994541	L7095	_	361964	6.69	putative Efa1/LifA-like cytotoxin protein	interactions with host environment	Ler+	Unknown/Multiple Localization	No Data	1	31.3333	0.0319149	31.3333	18	2.34057	0.0192544	3.53	13.4	3.8	1	1	1	1	77	14	3
15804217	Z5107	espA	20573.2	4.78	secreted protein EspA	interactions with host environment	Ler+	Unknown	Energy metabolism	42.5	1060.67	0.0400691	24.9569	18	2.2014	0.0277078	205.85	478.28	2.32	167	1	1	1	1846	821	515
15804220	Z5110	eae	101832	8.68	intimin adherence protein	interactions with host environment	Ler+	Outer Membrane	Cellular processes	155.5	2429	0.0640181	15.6206	18	2.12132	0.0338948	385.74	1129.61	2.93	201	329	91	1	2955	2169	2163
15804221	Z5111	cesT	17680.3	4.45	putative T3SS effector chaperone CesT	interactions with host environment	Ler+	Cytoplasmic	Unclassified	634.5	3128	0.202845	4.92987	18	2.12132	0.0338948	1960	1703.06	0.87	543	887	1107	1	1799	5074	2511
15804222	Z5112	tir	58019.9	5.01	putative translocated intimin receptor protein	interactions with host environment	Ler+	Extracellular	Unclassified	479.75	2716	0.176638	5.66128	18	2.12132	0.0338948	820.81	1437.99	1.75	684	813	421	1	3493	2681	1974
15804237	Z5127	cesD	17502.2	6.94	T3SS chaperone CesD	interactions with host environment	Ler+	Cytoplasmic	No Data	1	549.667	0.00181928	549.667	18	2.34057	0.0192544	18.14	235.63	12.99	1	1	1	1	1160	254	235
15799862	Z0192	fabZ	17032.3	6.84	(3R)-hydroxymyristoyl-ACP dehydratase	lipid and fatty acid biosynthesis	CpxR+,GadE+	Cytoplasmic	Fatty acid and phospholipid metabolism	791.5	1723.67	0.459196	2.17772	18	2.12132	0.0338948	1485.84	1190.97	0.8	844	1228	1	1093	1532	2207	1432
15799867	Z0197	accA	35240.1	5.76	acetyl-CoA carboxylase carboxyltransferase subunit alpha	lipid and fatty acid biosynthesis		Cytoplasmic	Fatty acid and phospholipid metabolism	520.5	817.667	0.636567	1.57093	18	2.12132	0.0338948	1580.88	647.96	0.41	408	740	736	198	823	865	765
15801210	Z1732	fabG	25587.3	6.76	3-ketoacyl-(acyl-carrier-protein) reductase	lipid and fatty acid biosynthesis		Cytoplasmic	Fatty acid and phospholipid metabolism	1948	3062.67	0.636047	1.57221	18	2.12132	0.0338948	2434.29	2425.76	1	2150	2031	1942	1669	3474	3512	2202
15801888	Z2512	fabI	27862.8	5.58	enoyl-(acyl carrier protein) reductase	lipid and fatty acid biosynthesis		Cytoplasmic Membrane	Fatty acid and phospholipid metabolism	4282.5	5144.33	0.832469	1.20125	18	2.12132	0.0338948	7930.49	4651.83	0.59	4133	3777	4695	4525	5287	5095	5051
15803790	Z4616	accC	49366.7	6.65	acetyl-CoA carboxylase biotin carboxylase subunit	lipid and fatty acid biosynthesis		Cytoplasmic	Fatty acid and phospholipid metabolism	1321.75	771.333	1.71359	0.58357	6	-2.12132	0.0338948	1159.38	1085.95	0.94	1509	1461	1287	1030	923	876	515
15804661	Z5668	acs	72106.8	5.61	acetyl-CoA synthetase	lipid and fatty acid biosynthesis	Crp+,Fis-	Cytoplasmic	Fatty acid and phospholipid metabolism	1	892	0.00112108	892	18	2.34057	0.0192544	4211	382.24	0.09	1	1	1	1	1043	825	808
161367648	Z0278	fadE	89178.1	7.98	acyl-CoA dehydrogenase	lipid and fatty acid metabolism	ArcA-	Cytoplasmic Membrane	Central intermediary metabolism	28	261.667	0.107006	9.34524	18	2.2014	0.0277078	150.59	127.72	0.85	109	1	1	1	347	116	322
15802218	Z2848	fadD	62361.7	6.22	long-chain-fatty-acid--CoA ligase	lipid and fatty acid metabolism	Crp+,ArcA-	Cytoplasmic	Fatty acid and phospholipid metabolism	1	135	0.00740741	135	18	2.34057	0.0192544	917.34	57.87	0.06	1	1	1	1	174	150	81
15804435	Z5366	fadA	40839.4	6.23	3-ketoacyl-CoA thiolase	lipid and fatty acid metabolism	Fis+,ArcA-	Cytoplasmic	Fatty acid and phospholipid metabolism	1	263	0.00380228	263	18	2.34057	0.0192544	2489.96	112.75	0.05	1	1	1	1	544	120	125
15804436	Z5367	fadB	79546.5	5.66	multifunctional fatty acid oxidation complex subunit alpha	lipid and fatty acid metabolism	Fis+,ArcA-	Cytoplasmic	Fatty acid and phospholipid metabolism	8.75	150	0.0583333	17.1429	18	2.2014	0.0277078	1448.59	68.74	0.05	32	1	1	1	241	61	148
15799849	Z0177	glnD	102419	6.34	PII uridylyl-transferase	nitrogen acquisition and metabolism	ArcA+, Fur-	Cytoplasmic Membrane	Central intermediary metabolism	109.75	1	109.75	0.00911162	6	-2.2014	0.0277078	63.84	62.79	0.98	152	101	126	60	1	1	1
15801456	Z2002	narH	58078.2	6.36	nitrate reductase 1, beta subunit	nitrogen acquisition and metabolism	Fnr+, NarL+,Fis-	Cytoplasmic Membrane	Energy metabolism	542.5	115	4.71739	0.211982	6	-2.12132	0.0338948	731.78	359.04	0.49	674	629	587	280	265	1	79
15803041	Z3781	ndk	15462.8	5.54	nucleoside diphosphate kinase	nucleotide biosynthesis/metabolism		Cytoplasmic	Purines, pyrimidines, nucleosides, and nucleotides	4860	7594.33	0.639951	1.56262	18	2.12132	0.0338948	13183.5	6031.88	0.46	3400	4445	5220	6375	6492	9329	6962
15803082	Z3835	purL	141443	5.23	phosphoribosylformylglycinamidine synthase	nucleotide biosynthesis/metabolism		Cytoplasmic	Purines, pyrimidines, nucleosides, and nucleotides	1908.5	1508.33	1.2653	0.790324	6	-2.12132	0.0338948	1166.75	1737.16	1.49	2273	1792	1945	1624	1614	1319	1592
15804956	Z5986	deoD	25948.9	5.42	purine nucleoside phosphorylase	nucleotide biosynthesis/metabolism	Fis+	Cytoplasmic	Purines, pyrimidines, nucleosides, and nucleotides	4989.5	3663.33	1.36201	0.734209	6	-2.12132	0.0338948	3190.77	4421.15	1.39	3976	4015	6700	5267	3312	3706	3972
15802177	Z2799	sppA	67139.9	5.99	protease IV	proteolysis/peptidolysis		Cytoplasmic Membrane	Protein fate	187.5	40	4.6875	0.213333	6	-2.14052	0.0323129	131.32	124.1	0.95	215	234	145	156	118	1	1
15803443	Z4245	pepP	49815.5	5.2	proline aminopeptidase P II	proteolysis/peptidolysis		Cytoplasmic	Protein fate	1028	2210.67	0.465018	2.15045	18	2.12132	0.0338948	2486.88	1534.86	0.62	577	629	1563	1343	1906	2600	2126
15803474	Z4280	yggG	31826	8.08	predicted peptidase YggG	proteolysis/peptidolysis		Unknown	Protein fate	22.5	153	0.147059	6.8	17.5	2.03764	0.0415863	573.11	78.08	0.14	1	1	1	87	97	87	275
15802192	Z2817	msrB	15450.6	5.58	methionine sulfoxide reductase B	redox	Fis-	Cytoplasmic	Unknown function	210	592.667	0.354331	2.82222	18	2.14052	0.0323129	3334.58	373.73	0.11	500	1	338	1	550	720	508
15802985	Z3719	maeB	82485.9	5.34	NADP-requiring malate dehydrogenase	redox		Cytoplasmic	Unclassified	1769	3581	0.493996	2.02431	18	2.12132	0.0338948	4848.58	2545.44	0.52	1739	1797	2416	1124	4027	2927	3789
15804643	Z5649	qor	35170.8	8.66	quinone oxidoreductase, NADPH-dependent	redox		Cytoplasmic	Energy metabolism	133.75	599.667	0.223041	4.48349	18	2.12132	0.0338948	569	333.26	0.59	1	107	133	294	780	397	622
15800054	Z0420	yahK	37966.9	5.85	predicted Zn-dependent oxidoreductase	redox ?		Cytoplasmic	Regulatory functions	205	429	0.477855	2.09268	18	2.12132	0.0338948	1013.74	300.94	0.3	180	311	244	85	524	373	390
15801908	Z2539	yciK	27969.9	7.67	short chain dehydrogenase	redox ?		Cytoplasmic	Unknown function	1	270.333	0.00369914	270.333	18	2.34057	0.0192544	599.09	115.91	0.19	1	1	1	1	306	238	267
15803951	Z4807	yhhW	26290.5	5.21	probable quercetin 2,3-dioxygenase yhhW	redox ?		Cytoplasmic	Unclassified	1	254	0.00393701	254	18	2.34057	0.0192544	45.67	108.89	2.38	1	1	1	1	328	146	288
15803706	Z4525	pnp	79844	5.35	polynucleotide phosphorylase/polyadenylase	ribosome: mRNA processing		Cytoplasmic	Transcription	3668.5	4763.67	0.7701	1.29853	18	2.12132	0.0338948	2536.25	4137.9	1.63	4158	3751	3816	2949	4729	4206	5356
15802126	Z2743	pheS	36800.3	5.79	phenylalanyl-tRNA synthetase subunit alpha	ribosome: protein biosynthesis		Cytoplasmic	Protein synthesis	2033.5	3153.67	0.644805	1.55086	18	2.12132	0.0338948	1841.47	2513.78	1.37	1516	2294	2282	2042	3062	3467	2932
15803839	Z4683	rpmC	7273.21	9.98	50S ribosomal protein L29	ribosome: protein biosynthesis		Cytoplasmic	Protein synthesis	7632.75	3082	2.47656	0.403786	6	-2.12132	0.0338948	4605	5682.34	1.23	5271	6788	11036	7436	1052	3287	4907
15804574	Z5557	rplA	24728.6	9.64	50S ribosomal protein L1	ribosome: protein biosynthesis		Cytoplasmic	Protein synthesis	5917	7380	0.801762	1.24725	18	2.12132	0.0338948	5207.48	6544.01	1.26	6090	6246	5338	5994	7794	7285	7061
15804722	Z5732	lysS	57824.3	5.1	lysyl-tRNA synthetase	ribosome: protein biosynthesis		Cytoplasmic	Protein synthesis	2854.25	507.333	5.62599	0.177747	6	-2.12132	0.0338948	4148.33	1848.57	0.45	2447	2993	4330	1647	880	489	153
15804791	Z5811	rpsR	8987.02	10.38	30S ribosomal protein S18	ribosome: protein biosynthesis		Cytoplasmic	Protein synthesis	9091.25	4973.33	1.828	0.547046	6	-2.12132	0.0338948	4460.6	7326.42	1.64	10903	7920	7609	9933	3639	4177	7104
15799850	Z0178	map	29329.8	5.64	methionine aminopeptidase	ribosome: protein maturation		Cytoplasmic	Protein fate	213	603.333	0.353039	2.83255	18	2.12132	0.0338948	1308.19	380.21	0.29	232	126	157	337	640	456	714
15800351	Z0783	ybeB	7677.5	4.73	ribosome-associated protein YbeB	ribosome: stability and binding		Unknown	Unknown function	1	866.667	0.00115385	866.667	18	2.34057	0.0192544	249.18	371.48	1.49	1	1	1	1	1097	486	1017
15803743	Z4566	yhbH	10749.9	6.5	putative sigma(54) modulation protein	ribosome: stability and binding		Cytoplasmic	Protein synthesis	181	1429.33	0.126632	7.89687	18	2.2014	0.0277078	682.35	715.64	1.05	1	1	1	721	2063	1100	1125
15804512	Z5468	uspD	16274.5	6.37	universal stress protein UspD	stress response	RpoE+	Cytoplasmic	Energy metabolism	5578	2352.33	2.37126	0.421716	6	-2.12132	0.0338948	2244.42	4195.71	1.87	4146	4517	9628	4021	2284	1741	3032
15804761	Z5779	hfq	11166	6.97	RNA-binding protein Hfq	stress response		Cytoplasmic	Mobile and extrachromosomal element functions	9134.5	16288	0.560812	1.78313	18	2.12132	0.0338948	7668.89	12200.1	1.59	7683	11456	6026	11373	16037	15851	16976
15800697	Z1176	terE	20478.8	4.69	colicin resistance and tellurite resistance protein	stress response		Cytoplasmic	Cellular processes	4864.5	6627	0.734043	1.36232	18	2.12132	0.0338948	5217.89	5619.78	1.08	4166	4539	5279	5474	5921	7769	6191
15802488	Z3170	sbmC	18060.7	4.6	DNA gyrase inhibitor	stress response to toxins	Crp +	Cytoplasmic	Unknown function	1	575.667	0.00173712	575.667	18	2.34057	0.0192544	217.98	246.65	1.13	1	1	1	1	585	373	769
15803879	Z4726	nirB	93183.4	5.79	nitrite reductase (NAD(P)H) subunit	stress response to toxins	Fnr+,NarL+,FruR-,HNS-	Cytoplasmic	Energy metabolism	1227.75	298.667	4.11077	0.243263	6	-2.12132	0.0338948	0	829.52	0	1183	1025	1438	1265	134	327	435
15800751	Z1232	trxB	34621.7	5.3	thioredoxin reductase	stress response to toxins/xenobiotics		Cytoplasmic	Energy metabolism	1672.5	2253.33	0.742234	1.34728	18	2.12132	0.0338948	3694.33	1921.46	0.52	1605	1211	1839	2035	2176	2056	2528
15804035	Z4900	gor	48742.3	5.64	glutathione reductase	stress response to toxins/xenobiotics	OxyR+	Cytoplasmic	Biosynthesis of cofactors, prosthetic groups, and carriers	460.75	787.667	0.584956	1.70953	18	2.12132	0.0338948	1091.39	601.02	0.55	365	398	371	709	805	716	842
15804041	Z4908	slp	22209.6	6.27	starvation lipoprotein Slp	stress response: nutrient starvation	GadE+,RcsB+	Outer Membrane	Cell envelope	3829.5	1695.33	2.25885	0.442704	6	-2.12132	0.0338948	1676.27	2914.67	1.74	3991	4038	4248	3041	2826	1676	584
15804927	Z5953	yjiY	77840.7	8.85	putative carbon starvation protein	stress response: nutrient starvation		Cytoplasmic Membrane	Regulatory functions	844.5	196.667	4.29407	0.232879	6	-2.12132	0.0338948	0	566.64	0	783	731	454	1410	245	1	344
15799860	Z0190	hlpA/skp	17687.5	9.69	periplasmic chaperone Skp	stress response: protein (re)folding	CpxR+,GadE+	Periplasmic	Cell envelope	418	1138	0.367311	2.72249	18	2.12132	0.0338948	1864.86	726.66	0.39	275	300	561	536	1218	1489	707
15800920	Z1418	cbpA	34387.6	6.27	curved DNA-binding protein CbpA	stress response: protein (re)folding		Cytoplasmic	Protein fate	611.75	224.333	2.72697	0.366708	6	-2.12132	0.0338948	302.48	445.73	1.47	652	710	706	379	286	255	132
15803429	Z4231	dsbC	25626.4	6.3	thiol:disulfide interchange protein DsbC	stress response: protein (re)folding	CpxR+	Periplasmic	Cell envelope	112.5	319.333	0.352296	2.83852	18	2.12132	0.0338948	442.28	201.07	0.45	132	144	173	1	293	392	273
161367489	Z5182	ibpB	16092.6	5.19	heat shock chaperone IbpB	stress response: protein (re)folding	RpoS+,RpoH+	Cytoplasmic	Cellular processes	1	942.667	0.00106082	942.667	18	2.34057	0.0192544	0	404.11	0	1	1	1	1	2330	340	158
15804286	Z5183	ibpA	15773.1	5.57	heat shock protein IbpA	stress response: protein (re)folding	RpoS+,RpoH+	Cytoplasmic	Protein fate	1	2290	0.000436681	2290	18	2.34057	0.0192544	341.03	981.46	2.88	1	1	1	1	4671	1953	246
15802856	Z3571	hisJ	28482.2	5.47	histidine-binding periplasmic protein of high-affinity histidine transport system	transport	NtrC+,HNS+	Periplasmic	Transport and binding proteins	2672	4265	0.626495	1.59618	18	2.12132	0.0338948	1705.81	3354.83	1.97	2673	2067	3271	2677	3420	5578	3797
15803204	Z3986	emrA	42735.3	9.33	multidrug resistance efflux protein EmrA	transport: drug efflux pump	EvgA+	Cytoplasmic Membrane	Transport and binding proteins	1	155.333	0.00643777	155.333	18	2.34057	0.0192544	66.97	66.56	0.99	1	1	1	1	321	71	74
15804057	Z4926	mdtE	41219	6.07	multidrug resistance efflux protein MdtE	transport: drug efflux pump	EvgA+,Crp-	Cytoplasmic Membrane	Regulatory functions	687.25	30.6667	22.4103	0.0446223	6	-2.14052	0.0323129	143.47	405.42	2.83	817	445	774	713	90	1	1
15804058	Z4927	mdtF	111563	5.33	multidrug resistance efflux protein MdtF	transport: drug efflux pump	EvgA+,Crp-	Cytoplasmic Membrane	Energy metabolism	344	1	344	0.00290698	6	-2.2014	0.0277078	37.04	196.5	5.3	506	612	149	109	1	1	1
15802935	Z3659	nupC	43488.1	8.4	permease of transport system for 3 nucleosides	transport: nucleosides	Crp+,LexA-	Cytoplasmic Membrane	Transport and binding proteins	1	628.667	0.00159067	628.667	18	2.34057	0.0192544	532.91	269.51	0.51	1	1	1	1	249	889	748
15804006	Z4868	nikA	58728.4	5.8	periplasmic binding protein for nickel	transport: small ions	Fnr+,NarL-	Periplasmic	Transport and binding proteins	126.5	400	0.31625	3.16206	18	2.12132	0.0338948	63.1	243.61	3.86	180	139	1	186	562	312	326
15803458	Z4261	mscS	30894.8	7.9	anion selective mechanosensitive channel MscS	transport: small ions/water	RpoS+	Cytoplasmic Membrane	Transport and binding proteins	2139.25	761.333	2.80987	0.355888	6	-2.12132	0.0338948	525.26	1548.67	2.95	2346	2716	1788	1707	808	575	901
15800381	Z0826	nagE/ptsN	68438.8	5.78	N-acetyl glucosamine specific PTS system components IIABC	transport: sugars		Cytoplasmic Membrane	Transport and binding proteins	1103.75	1465.67	0.75307	1.3279	18	2.12132	0.0338948	794.45	1258.82	1.58	929	1125	1259	1102	1706	1316	1375
15802705	Z3404	mglA	56419.1	8.2	galactose/methyl galaxtoside transporter ATP-binding protein	transport: sugars	Crp+,Fis-	Cytoplasmic Membrane	Transport and binding proteins	43.75	402	0.108831	9.18857	18	2.14052	0.0323129	655.11	197.05	0.3	127	46	1	1	745	331	130
15802706	Z3405	mglB	35741.1	5.68	galactose-binding transport protein; receptor for galactose taxis	transport: sugars	Crp+,Fis-	Periplasmic	Transport and binding proteins	1435.25	3165	0.453476	2.20519	18	2.12132	0.0338948	3703.54	2176.73	0.59	1226	1336	1820	1359	3024	3720	2751
15802723	Z3425	fruA	57458.6	8.82	fructose-specific PTS system IIBC component	transport: sugars	FruR-	Cytoplasmic Membrane	Energy metabolism	1824.75	849	2.14929	0.465269	6	-2.12132	0.0338948	57.17	1406.67	24.61	2350	1617	1173	2159	681	726	1140
15800491	Z0955	_	34904.3	5.89	hypothetical protein Z0955	unknown function		Unknown	Mobile and extrachromosomal element functions	147	630	0.233333	4.28571	18	2.14052	0.0323129	292.95	353.8	1.21	340	246	1	1	875	667	348
15800688	Z1167	_	41020.8	5.97	hypothetical protein Z1167	unknown function		Cytoplasmic	Hypothetical proteins	67.25	657.333	0.102307	9.77447	18	2.12132	0.0338948	119.94	319.93	2.67	78	84	106	1	1208	614	150
15800778	Z1263	ycaR	6854.76	4.91	conserved protein YcaR	unknown function		Unknown	Unknown function	1339.75	661	2.02685	0.493376	6	-2.12132	0.0338948	658.74	1048.72	1.59	1087	1481	1473	1318	898	533	552
15802018	Z2603	_	33871.6	9.27	hypothetical protein Z2603	unknown function		Unknown	Hypothetical proteins	873.25	579.667	1.50647	0.663804	6	-2.14052	0.0323129	994.83	747.36	0.75	982	840	855	816	618	618	503
15802185	Z2809	_	36375.6	5.13	hypothetical protein Z2809	unknown function		Cytoplasmic	Central intermediary metabolism	1	147	0.00680272	147	18	2.34057	0.0192544	212.29	62.95	0.3	1	1	1	1	91	325	25
15802582	Z3271	_	12514.7	5.52	uncharacterized protein Z3271	unknown function		Unknown	Hypothetical proteins	617.75	80.3333	7.68983	0.130042	6	-2.14052	0.0323129	566.01	387.15	0.68	297	318	402	1454	239	1	1
15804422	Z5352	ysgA	31907.9	5.68	putative carboxymethylenebutenolidase	unknown function	Fnr-	Unknown	Energy metabolism	195.5	545	0.358716	2.78772	18	2.12132	0.0338948	1690.6	345.23	0.2	227	247	307	1	500	670	465
15804511	Z5467	yiiS	10745.7	4.55	conserved protein YiiS	unknown function	RpoE+	Unknown	Hypothetical proteins	4282.5	1372.67	3.11984	0.320529	6	-2.12132	0.0338948	1994.05	3035.5	1.52	5038	3467	6825	1800	1461	1299	1358
