# Supplementary material for: Proteomic View of Interactions of Shiga Toxin-Producing Escherichia coli with the Intestinal Environment in Gnotobiotic Piglets
Source: PLoS One. 2013 Jun 19;8(6):e66462. doi: 10.1371/journal.pone.0066462 (PMC3686733; doi:10.1371/journal.pone.0066462)
Supplement: Dataset S3 — Protein identifications searching the LC-MS/MS data from in vivo and in vitro EHEC samples with the Sus scrofa protein sequence database (RefSeq in NCBI). Detailed legends are provided in the 1st worksheet of the dataset. (XLSX) [file pone.0066462.s004.xlsx]

## Sheet: Legend Dataset S3
Dataset S3
Protein identifications searching the LC-MS/MS data from in vivo and in vitro EHEC samples with the Sus scrofa protein sequence database (RefSeq in NCBI)
20 separate tables (worksheets) present a set of 10 protein summary reports and peptide summary reports for 10 different 2-DLC-MS/MS datasets. These reports are derived from Mascot v2.3 analysis using the software Proteome Discoverer (Thermo Fisher Scientific). The first 7 reports (one protein and one peptide summary report, 14 worksheets) represent datasets from a bacterial sample isolated from …
Protein Summary Report
Column A: Prot ID	Indicates a protein identification. The protein hits listed only include one member per protein family (that with the highest total Mascot score). All additional proteins in a protein family, indistinguishable on the basis of the peptide match evidence, were eliminated.
Column B: Accession	gi| and Ref Seq ID
Column C: Description	the name of the protein that appears in the Accession column
Column D: Mascot score	Mascot incorporates a probability-based implementation of the Mowse algorithm (see http://www.matrixscience.com/search_form_select.html).
Column E: # PSM	the total number of identified peptide sequences (peptide spectrum matches) for the protein, including those redundantly identified
Column F: # peptide	the number of significant distinct peptide sequences in the protein group
Column G: Pr Coverage	the percentage of the protein sequence covered by identified peptides
Column H: Pr Length	the protein sequence length of the protein in amino acids
Column I: MW [kDa]	the calculated molecular weight of the protein (without considering PTMs) and ioselectric point of protein
Column J: pI	the calculated isolelectric point of the protein
Color notes		the protein is unique to the in vivo datasets, has at least one Pep_expect value of <0.01 and is not a contaminant (eg. cytokeratin) or protein added purposefully (eg. trypsin/trypsinogen)
		the protein has high sequence identity amino acid sequences comparing the Sus scrofa protein and an E. coli orthologous protein; therefore the protein cannot be assigned unambiguously to the pig origin
Peptide Summary Report
Columns A to F	See protein summary report
Column G: Pep_query	Number of the peptide query
Column H: Pep_rank	Rank of the peptide match, (1 to 10, where 1 is the best match)
Column I: Pep_isbold	The peptide sequence is not unique but has the best match to theMS/MS spectrum
Column J: Pep_isunique	The peptide sequence is unique in the searched database
Column K: Pep_exp_mz	The deprotonated monoisotopic mass of the peptide divided by its charge, in Daltons
Column L: Pep_exp_mr	The deprotonated monoisotopic mass of the peptide, in Daltons
Column M: Pep_exp_z	The charge of the assigned peptide
Column N: Pep_calc_mr	The protonated monoisotopic mass of the peptide, in Daltons
Column O: Pep_delta	The difference between the theoretical mass of the peptide and the experimental mass of the precursor ion, in Daltons
Column P: Pep_miss	Number of missed peptide cleavage sites within the assigned peptide sequence
Column Q: Pep_score	The ion score calculated by the mascot algorithm (http://mascot/mascot/help/mis_help.html)
Column R: Pep_homol	The ion homology score calculated by the mascot algorithm (http://mascot/mascot/help/mis_help.html)
Column S: Pep_ident	The ion identity score calculated by the mascot algorithm (http://mascot/mascot/help/mis_help.html)
Column T: Pep_expect	Expectation value for the peptide match: the probability that the assigned PSM is incorrect
Column U: Pep_res_before	Amino acid residue prior to sequence of the identified peptide
Column V: Pep_seq	Sequence of the identified peptide
Column W: Pep_res_after	Amino acid residue following sequence of the identified peptide

## Sheet: invivo_EHEC_100318_Protein
Prot ID	Accession	Description	Mascot Score	# PSMs	# Peptides	Pr Coverage	Pr Length	MW (kDa)	pI
1	gi|242253868	trypsinogen precursor [Sus scrofa]	2952	70	4	23.6	246	26549	6.85
2	gi|335292694	PREDICTED: heat shock-related 70 kDa protein 2-like [Sus scrofa]	742	16	1	7.5	636	70065	5.51
3	gi|178056512	heat shock 70 kDa protein 1-like [Sus scrofa]	742	16	1	8	641	70699	6.01
4	gi|350579657	PREDICTED: 78 kDa glucose-regulated protein [Sus scrofa]	742	16	1	3.9	659	73167	5.43
5	gi|350583977	PREDICTED: keratin, type II cytoskeletal 1 [Sus scrofa]	690	22	4	12.1	629	65381	8.18
6	gi|311252272	PREDICTED: lithostathine-like isoform 1 [Sus scrofa]	616	18	4	27.3	176	19853	5.3
7	gi|335309396	PREDICTED: adenylate kinase 2, mitochondrial-like isoform 1 [Sus scrofa]	532	15	1	8.3	228	25328	6.24
8	gi|350583957	PREDICTED: keratin, type II cuticular Hb4 [Sus scrofa]	406	14	7	28	593	64553	8.12
9	gi|350583970	PREDICTED: keratin, type II cytoskeletal 75-like [Sus scrofa]	380	12	2	15.1	551	59845	8.45
10	gi|114703738	deleted in malignant brain tumors 1 protein precursor [Sus scrofa]	339	9	3	5.8	1349	151127	5.42
11	gi|335297667	PREDICTED: keratin, type I cuticular Ha6 isoform 2 [Sus scrofa]	327	11	5	20.5	459	52340	4.86
12	gi|148747492	keratin, type II cytoskeletal 2 epidermal [Sus scrofa]	320	9	3	11.5	642	66510	7.47
13	gi|350580796	PREDICTED: hypothetical protein LOC100522363 [Sus scrofa]	305	10	4	14.1	576	60839	11.55
14	gi|311267330	PREDICTED: keratin, type I cytoskeletal 10-like [Sus scrofa]	282	10	5	15.2	613	62835	4.98
15	gi|329744642	glyceraldehyde-3-phosphate dehydrogenase [Sus scrofa]	271	28	2	9	333	36041	8.51
17	gi|350592969	PREDICTED: phosphoglycerate mutase 1-like [Sus scrofa]	215	6	1	7.1	254	28900	6.67
19	gi|350590321	PREDICTED: keratin, type I cytoskeletal 14-like isoform 1 [Sus scrofa]	190	5	4	18.4	473	51862	5.04
20	gi|211578396	uncharacterized protein LOC100156145 [Sus scrofa]	187	2	1	8.8	457	50768	8.54
21	gi|47523278	resistin precursor [Sus scrofa]	178	5	2	48.6	109	12312	8.03
22	gi|194037336	PREDICTED: keratin, type II cytoskeletal 1b [Sus scrofa]	169	7	2	15.3	595	63962	5.75
23	gi|350584000	PREDICTED: keratin, type II cytoskeletal 78-like [Sus scrofa]	162	6	1	10.7	394	42842	9.23
24	gi|311251336	PREDICTED: elongation factor Tu, mitochondrial-like [Sus scrofa]	145	2	2	12.4	452	49762	6.72
26	gi|311267693	PREDICTED: eosinophil peroxidase [Sus scrofa]	113	4	2	9.5	715	81652	10.1
29	gi|335281875	PREDICTED: proteoglycan 3-like [Sus scrofa]	104	4	2	15.2	224	26406	9.08
30	gi|311267256	PREDICTED: keratin, type I cuticular Ha2 [Sus scrofa]	103	2	2	15.7	460	52563	4.89
31	gi|349585237	keratin 31 [Sus scrofa]	103	2	2	14.5	414	47874	4.79
32	gi|350590325	PREDICTED: LOW QUALITY PROTEIN: keratin, type I cuticular Ha4-like [Sus scrofa]	103	2	2	12.4	435	50499	5.35
33	gi|47523546	myoglobin [Sus scrofa]	102	4	2	13.6	154	17074	6.75
36	gi|311267290	PREDICTED: keratin-associated protein 3-1-like [Sus scrofa]	98	1	1	14.3	98	11500	4.75
44	gi|350590319	PREDICTED: keratin, type I cytoskeletal 17-like [Sus scrofa]	90	3	3	12.9	448	49530	5
45	gi|311267268	PREDICTED: keratin, type I cytoskeletal 15-like [Sus scrofa]	90	3	3	16.3	460	49501	4.87
48	gi|311255413	PREDICTED: keratin, type II cytoskeletal 79 [Sus scrofa]	86	5	2	15.7	535	58094	6.45
49	gi|350580091	PREDICTED: proteoglycan 3-like [Sus scrofa]	85	2	1	10.3	224	25512	5.16
50	gi|311267276	PREDICTED: keratin, type I cytoskeletal 19-like [Sus scrofa]	84	2	2	9.2	404	44186	5.05
51	gi|47523720	glucose-6-phosphate isomerase [Sus scrofa]	83	3	2	10.4	558	63257	7.79
52	gi|335297670	PREDICTED: keratin, type I microfibrillar, 47.6 kDa-like [Sus scrofa]	83	1	1	14.9	403	46796	4.73
55	gi|311255411	PREDICTED: LOW QUALITY PROTEIN: keratin, type II cytoskeletal 4 [Sus scrofa]	75	5	2	15.2	611	66127	8.12
65	gi|311267326	PREDICTED: keratin, type I cytoskeletal 20-like [Sus scrofa]	63	1	1	5.8	430	49088	5.38
66	gi|311255405	PREDICTED: keratin, type II cytoskeletal 5 [Sus scrofa]	62	2	2	15.8	602	63356	7.59
71	gi|350583965	PREDICTED: keratin, type II cytoskeletal 6A-like [Sus scrofa]	58	2	2	10.3	601	63984	8.66
101	gi|311261653	PREDICTED: protein KIAA0284-like [Sus scrofa]	45	4	2	5.6	1542	165726	6.52
104	gi|194037700	PREDICTED: centrosomal protein of 290 kDa-like [Sus scrofa]	44	2	2	7.9	2481	290691	5.83
108	gi|350591252	PREDICTED: RNA-binding protein 5 [Sus scrofa]	43	2	2	5	815	92679	5.94

## Sheet: invivo_EHEC_100318_psms
Prot ID	Accession	Description	Mascot Score	# PSMs	# Peptides	Pep_query	Pep_rank	Pep_isbold	Pep_isunique	Pep_exp_mz	Pep_exp_mr	Pep_exp_z	Pep_calc_mr	Pep_delta	Pep_miss	Pep_score	Pep_homol	Pep_ident	Pep_expect	Pep_res_before	Pep_seq	Pep_res_after
1	gi|242253868	trypsinogen precursor [Sus scrofa]	2952	70	4	93675	2	1	1	421.413	840.812	2	841.502	-0.6905	0	13.69	27	34	6.1	R	VATVSLPR	S
1	gi|242253868	trypsinogen precursor [Sus scrofa]	2952	70	4	93690	1	1	1	843.396	842.389	1	841.502	0.8867	0	42.52	28	36	0.011	R	VATVSLPR	S
1	gi|242253868	trypsinogen precursor [Sus scrofa]	2952	70	4	93693	1	1	1	843.431	842.424	1	841.502	0.9215	0	27.96	23	36	0.32	R	VATVSLPR	S
1	gi|242253868	trypsinogen precursor [Sus scrofa]	2952	70	4	93695	1	1	1	843.449	842.441	1	841.502	0.9392	0	34.13	28	36	0.078	R	VATVSLPR	S
1	gi|242253868	trypsinogen precursor [Sus scrofa]	2952	70	4	93697	1	1	1	843.451	842.444	1	841.502	0.9416	0	32.45	24	36	0.11	R	VATVSLPR	S
1	gi|242253868	trypsinogen precursor [Sus scrofa]	2952	70	4	127339	1	1	1	1045.39	1044.38	1	1044.56	-0.1766	0	18.86	22	35	2.4	K	LSSPATLNSR	V
1	gi|242253868	trypsinogen precursor [Sus scrofa]	2952	70	4	127358	1	1	1	1045.45	1044.44	1	1044.56	-0.1146	0	28.33	27	35	0.27	K	LSSPATLNSR	V
1	gi|242253868	trypsinogen precursor [Sus scrofa]	2952	70	4	127488	1	1	1	523.443	1044.87	2	1044.56	0.3149	0	52.71		35	0.00094	K	LSSPATLNSR	V
1	gi|242253868	trypsinogen precursor [Sus scrofa]	2952	70	4	127493	1	1	1	523.457	1044.9	2	1044.56	0.3429	0	52.64		35	0.00093	K	LSSPATLNSR	V
1	gi|242253868	trypsinogen precursor [Sus scrofa]	2952	70	4	127525	1	1	1	523.515	1045.02	2	1044.56	0.4601	0	52.55		34	0.00071	K	LSSPATLNSR	V
1	gi|242253868	trypsinogen precursor [Sus scrofa]	2952	70	4	333781	1	1	1	737.315	2208.92	3	2210.1	-1.1727	0	57.27	27	32	0.00016	R	LGEHNIDVLEGNEQFINAAK	I
1	gi|242253868	trypsinogen precursor [Sus scrofa]	2952	70	4	333787	1	1	1	737.349	2209.02	3	2210.1	-1.0728	0	43.53	26	32	0.0037	R	LGEHNIDVLEGNEQFINAAK	I
1	gi|242253868	trypsinogen precursor [Sus scrofa]	2952	70	4	333808	1	1	1	737.413	2209.22	3	2210.1	-0.8811	0	16.12	29	32	2	R	LGEHNIDVLEGNEQFINAAK	I
1	gi|242253868	trypsinogen precursor [Sus scrofa]	2952	70	4	333819	1	1	1	1105.64	2209.27	2	2210.1	-0.8253	0	58.96	20	32	0.00011	R	LGEHNIDVLEGNEQFINAAK	I
1	gi|242253868	trypsinogen precursor [Sus scrofa]	2952	70	4	333828	1	1	1	737.448	2209.32	3	2210.1	-0.7734	0	82.15	25	32	5e-07	R	LGEHNIDVLEGNEQFINAAK	I
1	gi|242253868	trypsinogen precursor [Sus scrofa]	2952	70	4	333863	1	1	1	737.533	2209.58	3	2210.1	-0.5199	0	27.37	23	30	0.12	R	LGEHNIDVLEGNEQFINAAK	I
1	gi|242253868	trypsinogen precursor [Sus scrofa]	2952	70	4	333877	1	1	1	737.56	2209.66	3	2210.1	-0.4374	0	42.05	20	31	0.0043	R	LGEHNIDVLEGNEQFINAAK	I
1	gi|242253868	trypsinogen precursor [Sus scrofa]	2952	70	4	333878	1	1	1	737.562	2209.66	3	2210.1	-0.4338	0	82.37	30	31	4e-07	R	LGEHNIDVLEGNEQFINAAK	I
1	gi|242253868	trypsinogen precursor [Sus scrofa]	2952	70	4	333881	1	1	1	737.573	2209.7	3	2210.1	-0.4005	0	55.08	25	31	0.00023	R	LGEHNIDVLEGNEQFINAAK	I
1	gi|242253868	trypsinogen precursor [Sus scrofa]	2952	70	4	333886	1	1	1	737.585	2209.73	3	2210.1	-0.3651	0	54.6	25	31	0.00027	R	LGEHNIDVLEGNEQFINAAK	I
1	gi|242253868	trypsinogen precursor [Sus scrofa]	2952	70	4	333896	1	1	1	737.609	2209.8	3	2210.1	-0.2922	0	27	20	32	0.17	R	LGEHNIDVLEGNEQFINAAK	I
1	gi|242253868	trypsinogen precursor [Sus scrofa]	2952	70	4	333901	1	1	1	737.62	2209.84	3	2210.1	-0.2595	0	29.89	23	32	0.089	R	LGEHNIDVLEGNEQFINAAK	I
1	gi|242253868	trypsinogen precursor [Sus scrofa]	2952	70	4	333902	1	1	1	737.622	2209.84	3	2210.1	-0.2526	0	50.33	30	32	0.00081	R	LGEHNIDVLEGNEQFINAAK	I
1	gi|242253868	trypsinogen precursor [Sus scrofa]	2952	70	4	333905	1	1	1	737.63	2209.87	3	2210.1	-0.2277	0	67.08		32	1.7e-05	R	LGEHNIDVLEGNEQFINAAK	I
1	gi|242253868	trypsinogen precursor [Sus scrofa]	2952	70	4	333921	1	1	1	737.687	2210.04	3	2210.1	-0.0591	0	34.44	19	32	0.032	R	LGEHNIDVLEGNEQFINAAK	I
1	gi|242253868	trypsinogen precursor [Sus scrofa]	2952	70	4	333926	1	1	1	737.7	2210.08	3	2210.1	-0.0174	0	39.91	22	32	0.009	R	LGEHNIDVLEGNEQFINAAK	I
1	gi|242253868	trypsinogen precursor [Sus scrofa]	2952	70	4	333927	1	1	1	1106.05	2210.09	2	2210.1	-0.0053	0	103.7	26	32	3.8e-09	R	LGEHNIDVLEGNEQFINAAK	I
1	gi|242253868	trypsinogen precursor [Sus scrofa]	2952	70	4	333928	1	1	1	737.709	2210.1	3	2210.1	0.0081	0	20.86	24	32	0.72	R	LGEHNIDVLEGNEQFINAAK	I
1	gi|242253868	trypsinogen precursor [Sus scrofa]	2952	70	4	333933	1	1	1	1106.09	2210.17	2	2210.1	0.0767	0	94.71	25	32	3e-08	R	LGEHNIDVLEGNEQFINAAK	I
1	gi|242253868	trypsinogen precursor [Sus scrofa]	2952	70	4	333934	1	1	1	737.734	2210.18	3	2210.1	0.0843	0	43.72	16	32	0.0037	R	LGEHNIDVLEGNEQFINAAK	I
1	gi|242253868	trypsinogen precursor [Sus scrofa]	2952	70	4	333941	1	1	1	1106.12	2210.22	2	2210.1	0.1227	0	92.3	22	32	5.2e-08	R	LGEHNIDVLEGNEQFINAAK	I
1	gi|242253868	trypsinogen precursor [Sus scrofa]	2952	70	4	333942	1	1	1	737.75	2210.23	3	2210.1	0.1311	0	47.41	22	32	0.0016	R	LGEHNIDVLEGNEQFINAAK	I
1	gi|242253868	trypsinogen precursor [Sus scrofa]	2952	70	4	333943	1	1	1	737.75	2210.23	3	2210.1	0.1326	0	73.73	27	32	3.7e-06	R	LGEHNIDVLEGNEQFINAAK	I
1	gi|242253868	trypsinogen precursor [Sus scrofa]	2952	70	4	333947	1	1	1	1106.13	2210.24	2	2210.1	0.1447	0	107.02	25	32	1.7e-09	R	LGEHNIDVLEGNEQFINAAK	I
1	gi|242253868	trypsinogen precursor [Sus scrofa]	2952	70	4	333953	1	1	1	1106.15	2210.28	2	2210.1	0.1847	0	106.99	26	32	1.8e-09	R	LGEHNIDVLEGNEQFINAAK	I
1	gi|242253868	trypsinogen precursor [Sus scrofa]	2952	70	4	333954	1	1	1	1106.15	2210.29	2	2210.1	0.1927	0	92.19	25	32	5.3e-08	R	LGEHNIDVLEGNEQFINAAK	I
1	gi|242253868	trypsinogen precursor [Sus scrofa]	2952	70	4	333955	1	1	1	1106.16	2210.3	2	2210.1	0.2027	0	106.92	24	32	1.8e-09	R	LGEHNIDVLEGNEQFINAAK	I
1	gi|242253868	trypsinogen precursor [Sus scrofa]	2952	70	4	333958	1	1	1	737.784	2210.33	3	2210.1	0.2343	0	73.23	25	32	4.1e-06	R	LGEHNIDVLEGNEQFINAAK	I
1	gi|242253868	trypsinogen precursor [Sus scrofa]	2952	70	4	333960	1	1	1	737.788	2210.34	3	2210.1	0.2469	0	74.48	25	32	3.1e-06	R	LGEHNIDVLEGNEQFINAAK	I
1	gi|242253868	trypsinogen precursor [Sus scrofa]	2952	70	4	333961	1	1	1	737.791	2210.35	3	2210.1	0.2532	0	68.01	21	32	1.4e-05	R	LGEHNIDVLEGNEQFINAAK	I
1	gi|242253868	trypsinogen precursor [Sus scrofa]	2952	70	4	333962	1	1	1	1106.19	2210.37	2	2210.1	0.2747	0	108.47	24	32	1.2e-09	R	LGEHNIDVLEGNEQFINAAK	I
1	gi|242253868	trypsinogen precursor [Sus scrofa]	2952	70	4	333967	1	1	1	737.818	2210.43	3	2210.1	0.3363	0	79.2	23	32	9.7e-07	R	LGEHNIDVLEGNEQFINAAK	I
1	gi|242253868	trypsinogen precursor [Sus scrofa]	2952	70	4	333968	1	1	1	1106.22	2210.44	2	2210.1	0.3387	0	70.01	20	32	8e-06	R	LGEHNIDVLEGNEQFINAAK	I
1	gi|242253868	trypsinogen precursor [Sus scrofa]	2952	70	4	333969	1	1	1	737.821	2210.44	3	2210.1	0.3456	0	65.57	26	32	2.2e-05	R	LGEHNIDVLEGNEQFINAAK	I
1	gi|242253868	trypsinogen precursor [Sus scrofa]	2952	70	4	333972	1	1	1	737.832	2210.48	3	2210.1	0.3786	0	63.21	23	31	3.6e-05	R	LGEHNIDVLEGNEQFINAAK	I
1	gi|242253868	trypsinogen precursor [Sus scrofa]	2952	70	4	333973	1	1	1	737.836	2210.49	3	2210.1	0.3882	0	30.92	17	31	0.06	R	LGEHNIDVLEGNEQFINAAK	I
1	gi|242253868	trypsinogen precursor [Sus scrofa]	2952	70	4	333974	1	1	1	737.836	2210.49	3	2210.1	0.3897	0	56.44	18	31	0.00017	R	LGEHNIDVLEGNEQFINAAK	I
1	gi|242253868	trypsinogen precursor [Sus scrofa]	2952	70	4	333975	1	1	1	737.838	2210.49	3	2210.1	0.3957	0	59.75	21	31	7.8e-05	R	LGEHNIDVLEGNEQFINAAK	I
1	gi|242253868	trypsinogen precursor [Sus scrofa]	2952	70	4	333976	1	1	1	737.842	2210.5	3	2210.1	0.408	0	26.11	15	31	0.18	R	LGEHNIDVLEGNEQFINAAK	I
1	gi|242253868	trypsinogen precursor [Sus scrofa]	2952	70	4	333978	1	1	1	737.844	2210.51	3	2210.1	0.4128	0	44.58	19	31	0.0025	R	LGEHNIDVLEGNEQFINAAK	I
1	gi|242253868	trypsinogen precursor [Sus scrofa]	2952	70	4	333979	1	1	1	1106.27	2210.52	2	2210.1	0.4267	0	121.06	25	31	5.5e-11	R	LGEHNIDVLEGNEQFINAAK	I
1	gi|242253868	trypsinogen precursor [Sus scrofa]	2952	70	4	333980	1	1	1	737.851	2210.53	3	2210.1	0.4338	0	59.07	21	31	8.6e-05	R	LGEHNIDVLEGNEQFINAAK	I
1	gi|242253868	trypsinogen precursor [Sus scrofa]	2952	70	4	333984	1	1	1	737.875	2210.6	3	2210.1	0.5061	0	65.27	22	31	2e-05	R	LGEHNIDVLEGNEQFINAAK	I
1	gi|242253868	trypsinogen precursor [Sus scrofa]	2952	70	4	333988	1	1	1	737.881	2210.62	3	2210.1	0.5244	0	62.16	25	31	4.1e-05	R	LGEHNIDVLEGNEQFINAAK	I
1	gi|242253868	trypsinogen precursor [Sus scrofa]	2952	70	4	333990	1	1	1	737.892	2210.65	3	2210.1	0.558	0	45.47	24	31	0.002	R	LGEHNIDVLEGNEQFINAAK	I
1	gi|242253868	trypsinogen precursor [Sus scrofa]	2952	70	4	333991	1	1	1	737.896	2210.67	3	2210.1	0.5709	0	66.23	21	31	1.7e-05	R	LGEHNIDVLEGNEQFINAAK	I
1	gi|242253868	trypsinogen precursor [Sus scrofa]	2952	70	4	333992	1	1	1	737.916	2210.72	3	2210.1	0.6282	0	51.28	22	31	0.00058	R	LGEHNIDVLEGNEQFINAAK	I
1	gi|242253868	trypsinogen precursor [Sus scrofa]	2952	70	4	333993	1	1	1	737.918	2210.73	3	2210.1	0.6366	0	82.92	22	32	4.1e-07	R	LGEHNIDVLEGNEQFINAAK	I
1	gi|242253868	trypsinogen precursor [Sus scrofa]	2952	70	4	333996	1	1	1	737.929	2210.77	3	2210.1	0.6696	0	21.88	16	32	0.53	R	LGEHNIDVLEGNEQFINAAK	I
1	gi|242253868	trypsinogen precursor [Sus scrofa]	2952	70	4	333997	1	1	1	737.93	2210.77	3	2210.1	0.6702	0	32.22		32	0.049	R	LGEHNIDVLEGNEQFINAAK	I
1	gi|242253868	trypsinogen precursor [Sus scrofa]	2952	70	4	333998	1	1	1	737.933	2210.78	3	2210.1	0.681	0	41.82	20	32	0.0055	R	LGEHNIDVLEGNEQFINAAK	I
1	gi|242253868	trypsinogen precursor [Sus scrofa]	2952	70	4	334004	1	1	1	737.96	2210.86	3	2210.1	0.7617	0	48.45	24	32	0.0012	R	LGEHNIDVLEGNEQFINAAK	I
1	gi|242253868	trypsinogen precursor [Sus scrofa]	2952	70	4	334005	1	1	1	737.961	2210.86	3	2210.1	0.7641	0	69.59	23	32	9.5e-06	R	LGEHNIDVLEGNEQFINAAK	I
1	gi|242253868	trypsinogen precursor [Sus scrofa]	2952	70	4	334007	1	1	1	737.962	2210.87	3	2210.1	0.7683	0	62.85	23	32	4.5e-05	R	LGEHNIDVLEGNEQFINAAK	I
1	gi|242253868	trypsinogen precursor [Sus scrofa]	2952	70	4	334008	1	1	1	737.97	2210.89	3	2210.1	0.7926	0	29.75	18	32	0.092	R	LGEHNIDVLEGNEQFINAAK	I
1	gi|242253868	trypsinogen precursor [Sus scrofa]	2952	70	4	334010	1	1	1	737.981	2210.92	3	2210.1	0.8241	0	25.85	19	32	0.23	R	LGEHNIDVLEGNEQFINAAK	I
1	gi|242253868	trypsinogen precursor [Sus scrofa]	2952	70	4	334011	1	1	1	737.983	2210.93	3	2210.1	0.8298	0	67.64	25	32	1.5e-05	R	LGEHNIDVLEGNEQFINAAK	I
1	gi|242253868	trypsinogen precursor [Sus scrofa]	2952	70	4	334012	1	1	1	737.986	2210.94	3	2210.1	0.8406	0	21.68	18	32	0.6	R	LGEHNIDVLEGNEQFINAAK	I
1	gi|242253868	trypsinogen precursor [Sus scrofa]	2952	70	4	334013	1	1	1	737.988	2210.94	3	2210.1	0.8445	0	54.22	22	32	0.00033	R	LGEHNIDVLEGNEQFINAAK	I
1	gi|242253868	trypsinogen precursor [Sus scrofa]	2952	70	4	334014	1	1	1	737.989	2210.94	3	2210.1	0.8472	0	52.84	19	32	0.00046	R	LGEHNIDVLEGNEQFINAAK	I
1	gi|242253868	trypsinogen precursor [Sus scrofa]	2952	70	4	334017	1	1	1	738.002	2210.98	3	2210.1	0.8862	0	39.16	22	32	0.011	R	LGEHNIDVLEGNEQFINAAK	I
1	gi|242253868	trypsinogen precursor [Sus scrofa]	2952	70	4	334018	1	1	1	738.005	2210.99	3	2210.1	0.8967	0	39	20	32	0.011	R	LGEHNIDVLEGNEQFINAAK	I
1	gi|242253868	trypsinogen precursor [Sus scrofa]	2952	70	4	334021	1	1	1	738.017	2211.03	3	2210.1	0.933	0	57.6	24	32	0.00015	R	LGEHNIDVLEGNEQFINAAK	I
1	gi|242253868	trypsinogen precursor [Sus scrofa]	2952	70	4	334023	1	1	1	738.023	2211.05	3	2210.1	0.9507	0	60.73	20	32	7.4e-05	R	LGEHNIDVLEGNEQFINAAK	I
1	gi|242253868	trypsinogen precursor [Sus scrofa]	2952	70	4	334027	1	1	1	738.032	2211.07	3	2210.1	0.9771	0	54.01	18	32	0.00035	R	LGEHNIDVLEGNEQFINAAK	I
1	gi|242253868	trypsinogen precursor [Sus scrofa]	2952	70	4	334029	1	1	1	738.033	2211.08	3	2210.1	0.9807	0	61.21	23	32	6.6e-05	R	LGEHNIDVLEGNEQFINAAK	I
1	gi|242253868	trypsinogen precursor [Sus scrofa]	2952	70	4	334033	1	1	1	738.048	2211.12	3	2210.1	1.0254	0	77.36	26	32	1.6e-06	R	LGEHNIDVLEGNEQFINAAK	I
1	gi|242253868	trypsinogen precursor [Sus scrofa]	2952	70	4	334034	1	1	1	738.049	2211.13	3	2210.1	1.0284	0	38.17	19	32	0.013	R	LGEHNIDVLEGNEQFINAAK	I
1	gi|242253868	trypsinogen precursor [Sus scrofa]	2952	70	4	334037	1	1	1	738.068	2211.18	3	2210.1	1.0842	0	25.68	17	32	0.24	R	LGEHNIDVLEGNEQFINAAK	I
1	gi|242253868	trypsinogen precursor [Sus scrofa]	2952	70	4	334040	1	1	1	738.074	2211.2	3	2210.1	1.1022	0	73.01	24	32	4.4e-06	R	LGEHNIDVLEGNEQFINAAK	I
1	gi|242253868	trypsinogen precursor [Sus scrofa]	2952	70	4	334043	1	1	1	1106.63	2211.25	2	2210.1	1.1487	0	93.05	23	32	4.3e-08	R	LGEHNIDVLEGNEQFINAAK	I
1	gi|242253868	trypsinogen precursor [Sus scrofa]	2952	70	4	334044	1	1	1	738.089	2211.25	3	2210.1	1.149	0	43.13	19	32	0.0043	R	LGEHNIDVLEGNEQFINAAK	I
1	gi|242253868	trypsinogen precursor [Sus scrofa]	2952	70	4	334048	1	1	1	738.103	2211.29	3	2210.1	1.191	0	53.38	20	32	0.0004	R	LGEHNIDVLEGNEQFINAAK	I
1	gi|242253868	trypsinogen precursor [Sus scrofa]	2952	70	4	334056	1	1	1	738.13	2211.37	3	2210.1	1.2708	0	31.21	22	32	0.065	R	LGEHNIDVLEGNEQFINAAK	I
1	gi|242253868	trypsinogen precursor [Sus scrofa]	2952	70	4	334061	1	1	1	1106.71	2211.4	2	2210.1	1.3007	0	94.24		32	3.2e-08	R	LGEHNIDVLEGNEQFINAAK	I
1	gi|242253868	trypsinogen precursor [Sus scrofa]	2952	70	4	334063	1	1	1	738.145	2211.41	3	2210.1	1.3155	0	27.41	18	32	0.15	R	LGEHNIDVLEGNEQFINAAK	I
1	gi|242253868	trypsinogen precursor [Sus scrofa]	2952	70	4	334064	1	1	1	738.155	2211.44	3	2210.1	1.3455	0	56.61	22	32	0.00017	R	LGEHNIDVLEGNEQFINAAK	I
1	gi|242253868	trypsinogen precursor [Sus scrofa]	2952	70	4	334069	1	1	1	738.168	2211.48	3	2210.1	1.3851	0	37.02	18	31	0.015	R	LGEHNIDVLEGNEQFINAAK	I
1	gi|242253868	trypsinogen precursor [Sus scrofa]	2952	70	4	339728	1	1	1	761.648	2281.92	3	2282.17	-0.251	0	14.69	16	32	2.8	K	IITHPNFNGNTLDNDIMLIK	L
1	gi|242253868	trypsinogen precursor [Sus scrofa]	2952	70	4	340921	1	1	1	767.2	2298.58	3	2298.17	0.4101	0	21.37	19	31	0.47	K	IITHPNFNGNTLDNDIMLIK	L
1	gi|242253868	trypsinogen precursor [Sus scrofa]	2952	70	4	340927	1	1	1	767.233	2298.68	3	2298.17	0.5088	0	17.33	20	31	1.2	K	IITHPNFNGNTLDNDIMLIK	L
1	gi|242253868	trypsinogen precursor [Sus scrofa]	2952	70	4	340935	1	1	1	767.261	2298.76	3	2298.17	0.5946	0	16.08	19	31	1.9	K	IITHPNFNGNTLDNDIMLIK	L
1	gi|242253868	trypsinogen precursor [Sus scrofa]	2952	70	4	340965	1	1	1	1150.68	2299.34	2	2298.17	1.1716	0	56.1	17	32	0.00021	K	IITHPNFNGNTLDNDIMLIK	L
1	gi|242253868	trypsinogen precursor [Sus scrofa]	2952	70	4	340977	1	1	1	767.529	2299.56	3	2298.17	1.3965	0	47.23	24	31	0.0013	K	IITHPNFNGNTLDNDIMLIK	L	1.29
2	gi|335292694	PREDICTED: heat shock-related 70 kDa protein 2-like [Sus scrofa]	742	16	1	257492	1	1	0	830.296	1658.58	2	1658.89	-0.3098	0	72.53	25	33	6.7e-06	R	IINEPTAAAIAYGLDK	K
2	gi|335292694	PREDICTED: heat shock-related 70 kDa protein 2-like [Sus scrofa]	742	16	1	257524	1	1	0	830.476	1658.94	2	1658.89	0.049	0	72.1	23	33	7.4e-06	R	IINEPTAAAIAYGLDK	K
2	gi|335292694	PREDICTED: heat shock-related 70 kDa protein 2-like [Sus scrofa]	742	16	1	257539	1	1	0	830.533	1659.05	2	1658.89	0.164	0	74.47	24	33	4.3e-06	R	IINEPTAAAIAYGLDK	K
2	gi|335292694	PREDICTED: heat shock-related 70 kDa protein 2-like [Sus scrofa]	742	16	1	257586	1	1	0	830.671	1659.33	2	1658.89	0.4402	0	60.48	25	32	7.9e-05	R	IINEPTAAAIAYGLDK	K
2	gi|335292694	PREDICTED: heat shock-related 70 kDa protein 2-like [Sus scrofa]	742	16	1	257657	1	1	0	830.977	1659.94	2	1658.89	1.0526	0	102.08	23	33	7.5e-09	R	IINEPTAAAIAYGLDK	K
2	gi|335292694	PREDICTED: heat shock-related 70 kDa protein 2-like [Sus scrofa]	742	16	1	257671	1	1	0	831.036	1660.06	2	1658.89	1.1694	0	91.44	25	33	8.7e-08	R	IINEPTAAAIAYGLDK	K
2	gi|335292694	PREDICTED: heat shock-related 70 kDa protein 2-like [Sus scrofa]	742	16	1	257708	1	1	0	831.102	1660.19	2	1658.89	1.3026	0	100.52	28	33	9.8e-09	R	IINEPTAAAIAYGLDK	K
2	gi|335292694	PREDICTED: heat shock-related 70 kDa protein 2-like [Sus scrofa]	742	16	1	257718	1	1	0	831.126	1660.24	2	1658.89	1.3498	0	83.42	28	32	4.5e-07	R	IINEPTAAAIAYGLDK	K
2	gi|335292694	PREDICTED: heat shock-related 70 kDa protein 2-like [Sus scrofa]	742	16	1	257725	1	1	0	831.133	1660.25	2	1658.89	1.3642	0	103.77	30	32	4e-09	R	IINEPTAAAIAYGLDK	K
3	gi|178056512	heat shock 70 kDa protein 1-like [Sus scrofa]	742	16	1	257492	1	0	0	830.296	1658.58	2	1658.89	-0.3098	0	72.53	25	33	6.7e-06	R	IINEPTAAAIAYGLDK	A
3	gi|178056512	heat shock 70 kDa protein 1-like [Sus scrofa]	742	16	1	257524	1	0	0	830.476	1658.94	2	1658.89	0.049	0	72.1	23	33	7.4e-06	R	IINEPTAAAIAYGLDK	A
3	gi|178056512	heat shock 70 kDa protein 1-like [Sus scrofa]	742	16	1	257539	1	0	0	830.533	1659.05	2	1658.89	0.164	0	74.47	24	33	4.3e-06	R	IINEPTAAAIAYGLDK	A
3	gi|178056512	heat shock 70 kDa protein 1-like [Sus scrofa]	742	16	1	257586	1	0	0	830.671	1659.33	2	1658.89	0.4402	0	60.48	25	32	7.9e-05	R	IINEPTAAAIAYGLDK	A
3	gi|178056512	heat shock 70 kDa protein 1-like [Sus scrofa]	742	16	1	257657	1	0	0	830.977	1659.94	2	1658.89	1.0526	0	102.08	23	33	7.5e-09	R	IINEPTAAAIAYGLDK	A
3	gi|178056512	heat shock 70 kDa protein 1-like [Sus scrofa]	742	16	1	257671	1	0	0	831.036	1660.06	2	1658.89	1.1694	0	91.44	25	33	8.7e-08	R	IINEPTAAAIAYGLDK	A
3	gi|178056512	heat shock 70 kDa protein 1-like [Sus scrofa]	742	16	1	257708	1	0	0	831.102	1660.19	2	1658.89	1.3026	0	100.52	28	33	9.8e-09	R	IINEPTAAAIAYGLDK	A
3	gi|178056512	heat shock 70 kDa protein 1-like [Sus scrofa]	742	16	1	257718	1	0	0	831.126	1660.24	2	1658.89	1.3498	0	83.42	28	32	4.5e-07	R	IINEPTAAAIAYGLDK	A
3	gi|178056512	heat shock 70 kDa protein 1-like [Sus scrofa]	742	16	1	257725	1	0	0	831.133	1660.25	2	1658.89	1.3642	0	103.77	30	32	4e-09	R	IINEPTAAAIAYGLDK	A
4	gi|350579657	PREDICTED: 78 kDa glucose-regulated protein [Sus scrofa]	742	16	1	257492	1	0	0	830.296	1658.58	2	1658.89	-0.3098	0	72.53	25	33	6.7e-06	R	IINEPTAAAIAYGLDK	R
4	gi|350579657	PREDICTED: 78 kDa glucose-regulated protein [Sus scrofa]	742	16	1	257524	1	0	0	830.476	1658.94	2	1658.89	0.049	0	72.1	23	33	7.4e-06	R	IINEPTAAAIAYGLDK	R
4	gi|350579657	PREDICTED: 78 kDa glucose-regulated protein [Sus scrofa]	742	16	1	257539	1	0	0	830.533	1659.05	2	1658.89	0.164	0	74.47	24	33	4.3e-06	R	IINEPTAAAIAYGLDK	R
4	gi|350579657	PREDICTED: 78 kDa glucose-regulated protein [Sus scrofa]	742	16	1	257586	1	0	0	830.671	1659.33	2	1658.89	0.4402	0	60.48	25	32	7.9e-05	R	IINEPTAAAIAYGLDK	R
4	gi|350579657	PREDICTED: 78 kDa glucose-regulated protein [Sus scrofa]	742	16	1	257657	1	0	0	830.977	1659.94	2	1658.89	1.0526	0	102.08	23	33	7.5e-09	R	IINEPTAAAIAYGLDK	R
4	gi|350579657	PREDICTED: 78 kDa glucose-regulated protein [Sus scrofa]	742	16	1	257671	1	0	0	831.036	1660.06	2	1658.89	1.1694	0	91.44	25	33	8.7e-08	R	IINEPTAAAIAYGLDK	R
4	gi|350579657	PREDICTED: 78 kDa glucose-regulated protein [Sus scrofa]	742	16	1	257708	1	0	0	831.102	1660.19	2	1658.89	1.3026	0	100.52	28	33	9.8e-09	R	IINEPTAAAIAYGLDK	R
4	gi|350579657	PREDICTED: 78 kDa glucose-regulated protein [Sus scrofa]	742	16	1	257718	1	0	0	831.126	1660.24	2	1658.89	1.3498	0	83.42	28	32	4.5e-07	R	IINEPTAAAIAYGLDK	R
4	gi|350579657	PREDICTED: 78 kDa glucose-regulated protein [Sus scrofa]	742	16	1	257725	1	0	0	831.133	1660.25	2	1658.89	1.3642	0	103.77	30	32	4e-09	R	IINEPTAAAIAYGLDK	R
5	gi|350583977	PREDICTED: keratin, type II cytoskeletal 1 [Sus scrofa]	690	22	4	72655	2	1	1	352.314	702.614	2	702.352	0.2621	1	17.98	32	37	4.1	R	RSGGGGGR	F
5	gi|350583977	PREDICTED: keratin, type II cytoskeletal 1 [Sus scrofa]	690	22	4	72656	8	1	1	352.327	702.639	2	702.352	0.2871	1	13.04	36	37	13	R	RSGGGGGR	F
5	gi|350583977	PREDICTED: keratin, type II cytoskeletal 1 [Sus scrofa]	690	22	4	112396	1	1	1	487.133	972.252	2	972.524	-0.2721	0	38.45		36	0.029	K	IEISELNR	V
5	gi|350583977	PREDICTED: keratin, type II cytoskeletal 1 [Sus scrofa]	690	22	4	112428	1	1	1	487.284	972.553	2	972.524	0.0291	0	51.06		36	0.0016	K	IEISELNR	V
5	gi|350583977	PREDICTED: keratin, type II cytoskeletal 1 [Sus scrofa]	690	22	4	125209	1	1	1	517.542	1033.07	2	1032.51	0.5601	0	23.25	32	34	0.61	R	TLLEGEESR	M
5	gi|350583977	PREDICTED: keratin, type II cytoskeletal 1 [Sus scrofa]	690	22	4	125228	2	1	1	517.597	1033.18	2	1032.51	0.6715	0	22.83		35	0.89	R	TLLEGEESR	M
5	gi|350583977	PREDICTED: keratin, type II cytoskeletal 1 [Sus scrofa]	690	22	4	125230	1	1	1	517.623	1033.23	2	1032.51	0.7219	0	22.53	24	35	0.98	R	TLLEGEESR	M
5	gi|350583977	PREDICTED: keratin, type II cytoskeletal 1 [Sus scrofa]	690	22	4	129178	9	1	1	353.92	1058.74	3	1059.57	-0.83	0	14.88	33	35	6.2	K	SISISVAGGGGR	G
5	gi|350583977	PREDICTED: keratin, type II cytoskeletal 1 [Sus scrofa]	690	22	4	147218	5	1	1	381.787	1142.34	3	1142.5	-0.1552	0	14.98	28	35	5.6	R	GGSGSSFTSSGGR	G
5	gi|350583977	PREDICTED: keratin, type II cytoskeletal 1 [Sus scrofa]	690	22	4	201884	1	1	1	692.346	1382.68	2	1382.68	-0.0058	0	38.39	23	34	0.021	K	SLNNQFASFIDK	V
5	gi|350583977	PREDICTED: keratin, type II cytoskeletal 1 [Sus scrofa]	690	22	4	201892	1	1	1	692.399	1382.78	2	1382.68	0.1008	0	64.13	26	34	5.5e-05	K	SLNNQFASFIDK	V
5	gi|350583977	PREDICTED: keratin, type II cytoskeletal 1 [Sus scrofa]	690	22	4	201893	1	1	1	692.405	1382.8	2	1382.68	0.112	0	67.52	28	34	2.5e-05	K	SLNNQFASFIDK	V
5	gi|350583977	PREDICTED: keratin, type II cytoskeletal 1 [Sus scrofa]	690	22	4	201902	1	1	1	692.474	1382.93	2	1382.68	0.2496	0	62.45	26	34	8.1e-05	K	SLNNQFASFIDK	V
5	gi|350583977	PREDICTED: keratin, type II cytoskeletal 1 [Sus scrofa]	690	22	4	201904	1	1	1	692.482	1382.95	2	1382.68	0.2674	0	72.97	29	34	7.1e-06	K	SLNNQFASFIDK	V
5	gi|350583977	PREDICTED: keratin, type II cytoskeletal 1 [Sus scrofa]	690	22	4	201924	1	1	1	692.583	1383.15	2	1382.68	0.4686	0	67.78	26	33	1.7e-05	K	SLNNQFASFIDK	V
5	gi|350583977	PREDICTED: keratin, type II cytoskeletal 1 [Sus scrofa]	690	22	4	201937	1	1	1	692.646	1383.28	2	1382.68	0.5946	0	64.26	29	33	4.2e-05	K	SLNNQFASFIDK	V
5	gi|350583977	PREDICTED: keratin, type II cytoskeletal 1 [Sus scrofa]	690	22	4	201947	1	1	1	692.701	1383.39	2	1382.68	0.7038	0	66.38	28	34	3.2e-05	K	SLNNQFASFIDK	V
5	gi|350583977	PREDICTED: keratin, type II cytoskeletal 1 [Sus scrofa]	690	22	4	201956	1	1	1	692.765	1383.52	2	1382.68	0.832	0	51.47	24	34	0.001	K	SLNNQFASFIDK	V
5	gi|350583977	PREDICTED: keratin, type II cytoskeletal 1 [Sus scrofa]	690	22	4	201976	1	1	1	692.993	1383.97	2	1382.68	1.2882	0	62.48	29	34	8.1e-05	K	SLNNQFASFIDK	V
5	gi|350583977	PREDICTED: keratin, type II cytoskeletal 1 [Sus scrofa]	690	22	4	221159	2	1	0	738.025	1474.04	2	1474.78	-0.7429	0	51.84		34	0.00086	R	FLEQQNQVLQTK	W
5	gi|350583977	PREDICTED: keratin, type II cytoskeletal 1 [Sus scrofa]	690	22	4	221175	1	1	0	738.059	1474.1	2	1474.78	-0.6741	0	39.87	26	33	0.012	R	FLEQQNQVLQTK	W
5	gi|350583977	PREDICTED: keratin, type II cytoskeletal 1 [Sus scrofa]	690	22	4	221384	1	1	0	738.544	1475.07	2	1474.78	0.2957	0	52.17		34	0.00078	R	FLEQQNQVLQTK	W
5	gi|350583977	PREDICTED: keratin, type II cytoskeletal 1 [Sus scrofa]	690	22	4	221388	1	1	0	738.556	1475.1	2	1474.78	0.3189	0	25.36	27	33	0.36	R	FLEQQNQVLQTK	W
5	gi|350583977	PREDICTED: keratin, type II cytoskeletal 1 [Sus scrofa]	690	22	4	221393	2	1	0	738.563	1475.11	2	1474.78	0.3339	0	60.14		33	0.00012	R	FLEQQNQVLQTK	W
5	gi|350583977	PREDICTED: keratin, type II cytoskeletal 1 [Sus scrofa]	690	22	4	221396	1	1	0	738.568	1475.12	2	1474.78	0.3435	0	49.19		33	0.0014	R	FLEQQNQVLQTK	W
5	gi|350583977	PREDICTED: keratin, type II cytoskeletal 1 [Sus scrofa]	690	22	4	221423	1	1	0	738.607	1475.2	2	1474.78	0.4221	0	20.24	29	32	0.93	R	FLEQQNQVLQTK	W
5	gi|350583977	PREDICTED: keratin, type II cytoskeletal 1 [Sus scrofa]	690	22	4	221429	1	1	0	738.626	1475.24	2	1474.78	0.4593	0	68.68		32	1.3e-05	R	FLEQQNQVLQTK	W
5	gi|350583977	PREDICTED: keratin, type II cytoskeletal 1 [Sus scrofa]	690	22	4	221477	1	1	0	738.769	1475.52	2	1474.78	0.7463	0	24.38	27	34	0.5	R	FLEQQNQVLQTK	W
5	gi|350583977	PREDICTED: keratin, type II cytoskeletal 1 [Sus scrofa]	690	22	4	252925	1	1	1	546.743	1637.21	3	1637.85	-0.646	1	33.87	25	33	0.042	K	SLNNQFASFIDKVR	F
5	gi|350583977	PREDICTED: keratin, type II cytoskeletal 1 [Sus scrofa]	690	22	4	253027	1	1	1	820.126	1638.24	2	1637.85	0.3853	1	71.36	27	32	7e-06	K	SLNNQFASFIDKVR	F
5	gi|350583977	PREDICTED: keratin, type II cytoskeletal 1 [Sus scrofa]	690	22	4	253035	1	1	1	547.106	1638.3	3	1637.85	0.4448	1	30.33	20	32	0.081	K	SLNNQFASFIDKVR	F
5	gi|350583977	PREDICTED: keratin, type II cytoskeletal 1 [Sus scrofa]	690	22	4	253093	1	1	1	547.212	1638.61	3	1637.85	0.7616	1	30.53	23	33	0.11	K	SLNNQFASFIDKVR	F
5	gi|350583977	PREDICTED: keratin, type II cytoskeletal 1 [Sus scrofa]	690	22	4	253166	1	1	1	820.503	1638.99	2	1637.85	1.1391	1	77.94	25	33	2e-06	K	SLNNQFASFIDKVR	F
5	gi|350583977	PREDICTED: keratin, type II cytoskeletal 1 [Sus scrofa]	690	22	4	253169	1	1	1	820.51	1639	2	1637.85	1.1521	1	67.31	27	33	2.3e-05	K	SLNNQFASFIDKVR	F	0.28
6	gi|311252272	PREDICTED: lithostathine-like isoform 1 [Sus scrofa]	616	18	4	71441	1	1	1	696.202	695.194	1	694.365	0.8294	0	13.67	24	34	5.7	R	NTGYLK	W
6	gi|311252272	PREDICTED: lithostathine-like isoform 1 [Sus scrofa]	616	18	4	71502	1	1	1	696.216	695.208	1	694.365	0.8433	0	20.66	27	34	1.1	R	NTGYLK	W
6	gi|311252272	PREDICTED: lithostathine-like isoform 1 [Sus scrofa]	616	18	4	202470	1	1	1	694.484	1386.95	2	1387.52	-0.5664	0	45.02	31	34	0.0046	K	TWMDADMACQK	R
6	gi|311252272	PREDICTED: lithostathine-like isoform 1 [Sus scrofa]	616	18	4	266542	1	1	1	854.43	1706.85	2	1706.74	0.1018	0	54.85	25	33	0.00037	R	DYNCYVNLPYVCK	F
6	gi|311252272	PREDICTED: lithostathine-like isoform 1 [Sus scrofa]	616	18	4	266553	1	1	1	854.45	1706.88	2	1706.74	0.1416	0	16.47	19	33	2.6	R	DYNCYVNLPYVCK	F
6	gi|311252272	PREDICTED: lithostathine-like isoform 1 [Sus scrofa]	616	18	4	266582	1	1	1	854.516	1707.02	2	1706.74	0.2734	0	52.48	30	33	0.00065	R	DYNCYVNLPYVCK	F
6	gi|311252272	PREDICTED: lithostathine-like isoform 1 [Sus scrofa]	616	18	4	266591	1	1	1	854.542	1707.07	2	1706.74	0.3252	0	58.24	33	33	0.00017	R	DYNCYVNLPYVCK	F
6	gi|311252272	PREDICTED: lithostathine-like isoform 1 [Sus scrofa]	616	18	4	266592	1	1	1	854.544	1707.07	2	1706.74	0.3298	0	20.22	17	33	1.1	R	DYNCYVNLPYVCK	F
6	gi|311252272	PREDICTED: lithostathine-like isoform 1 [Sus scrofa]	616	18	4	266596	1	1	1	854.554	1707.09	2	1706.74	0.3504	0	68.48		33	1.6e-05	R	DYNCYVNLPYVCK	F
6	gi|311252272	PREDICTED: lithostathine-like isoform 1 [Sus scrofa]	616	18	4	266604	1	1	1	854.582	1707.15	2	1706.74	0.4068	0	15.96	19	33	2.8	R	DYNCYVNLPYVCK	F
6	gi|311252272	PREDICTED: lithostathine-like isoform 1 [Sus scrofa]	616	18	4	266623	1	1	1	854.674	1707.33	2	1706.74	0.591	0	50.77		32	0.00069	R	DYNCYVNLPYVCK	F
6	gi|311252272	PREDICTED: lithostathine-like isoform 1 [Sus scrofa]	616	18	4	266629	1	1	1	854.718	1707.42	2	1706.74	0.678	0	53.23	30	32	0.00042	R	DYNCYVNLPYVCK	F
6	gi|311252272	PREDICTED: lithostathine-like isoform 1 [Sus scrofa]	616	18	4	266660	1	1	1	855.005	1708	2	1706.74	1.2522	0	42.3	29	33	0.0066	R	DYNCYVNLPYVCK	F
6	gi|311252272	PREDICTED: lithostathine-like isoform 1 [Sus scrofa]	616	18	4	266671	1	1	1	855.07	1708.13	2	1706.74	1.382	0	46.81	26	33	0.0023	R	DYNCYVNLPYVCK	F
6	gi|311252272	PREDICTED: lithostathine-like isoform 1 [Sus scrofa]	616	18	4	270639	1	1	1	867.029	1732.04	2	1731.75	0.2904	0	67.89	21	33	1.9e-05	R	NPSTSSYPGYCGSLSR	N
6	gi|311252272	PREDICTED: lithostathine-like isoform 1 [Sus scrofa]	616	18	4	270661	1	1	1	867.072	1732.13	2	1731.75	0.3766	0	70.27	20	33	1.1e-05	R	NPSTSSYPGYCGSLSR	N
6	gi|311252272	PREDICTED: lithostathine-like isoform 1 [Sus scrofa]	616	18	4	270665	1	1	1	867.082	1732.15	2	1731.75	0.398	0	79.94	21	33	1.1e-06	R	NPSTSSYPGYCGSLSR	N
6	gi|311252272	PREDICTED: lithostathine-like isoform 1 [Sus scrofa]	616	18	4	270684	1	1	1	867.115	1732.22	2	1731.75	0.464	0	72.96	24	33	5.3e-06	R	NPSTSSYPGYCGSLSR	N
6	gi|311252272	PREDICTED: lithostathine-like isoform 1 [Sus scrofa]	616	18	4	270706	1	1	1	867.174	1732.33	2	1731.75	0.5804	0	70.52	20	32	7.6e-06	R	NPSTSSYPGYCGSLSR	N
6	gi|311252272	PREDICTED: lithostathine-like isoform 1 [Sus scrofa]	616	18	4	270815	1	1	1	867.453	1732.89	2	1731.75	1.1402	0	62.99	27	33	5.9e-05	R	NPSTSSYPGYCGSLSR	N
6	gi|311252272	PREDICTED: lithostathine-like isoform 1 [Sus scrofa]	616	18	4	270852	1	1	1	867.547	1733.08	2	1731.75	1.3262	0	65.13	25	33	3.6e-05	R	NPSTSSYPGYCGSLSR	N
6	gi|311252272	PREDICTED: lithostathine-like isoform 1 [Sus scrofa]	616	18	4	270856	1	1	1	867.558	1733.1	2	1731.75	1.3502	0	57.77	20	33	0.00019	R	NPSTSSYPGYCGSLSR	N
6	gi|311252272	PREDICTED: lithostathine-like isoform 1 [Sus scrofa]	616	18	4	317146	1	1	1	684.279	2049.82	3	2048.92	0.8915	1	37.95	23	32	0.016	K	WRDYNCYVNLPYVCK	F	0.87
7	gi|335309396	PREDICTED: adenylate kinase 2, mitochondrial-like isoform 1 [Sus scrofa]	532	15	1	146044	1	1	1	568.233	1134.45	2	1134.58	-0.1308	0	71.03	32	35	1.4e-05	K	NGFLLDGFPR	T
7	gi|335309396	PREDICTED: adenylate kinase 2, mitochondrial-like isoform 1 [Sus scrofa]	532	15	1	146077	1	1	1	568.319	1134.62	2	1134.58	0.0412	0	88.4	32	35	2.5e-07	K	NGFLLDGFPR	T
7	gi|335309396	PREDICTED: adenylate kinase 2, mitochondrial-like isoform 1 [Sus scrofa]	532	15	1	146082	1	1	1	568.34	1134.67	2	1134.58	0.0834	0	84.9	32	35	5.6e-07	K	NGFLLDGFPR	T
7	gi|335309396	PREDICTED: adenylate kinase 2, mitochondrial-like isoform 1 [Sus scrofa]	532	15	1	146135	1	1	1	568.496	1134.98	2	1134.58	0.3946	0	67.49	32	34	2.5e-05	K	NGFLLDGFPR	T
7	gi|335309396	PREDICTED: adenylate kinase 2, mitochondrial-like isoform 1 [Sus scrofa]	532	15	1	146150	1	1	1	568.52	1135.03	2	1134.58	0.4438	0	65.15	31	34	3.9e-05	K	NGFLLDGFPR	T
7	gi|335309396	PREDICTED: adenylate kinase 2, mitochondrial-like isoform 1 [Sus scrofa]	532	15	1	146153	1	1	1	568.535	1135.06	2	1134.58	0.4732	0	68.02	26	33	1.9e-05	K	NGFLLDGFPR	T
7	gi|335309396	PREDICTED: adenylate kinase 2, mitochondrial-like isoform 1 [Sus scrofa]	532	15	1	146162	1	1	1	568.574	1135.13	2	1134.58	0.5512	0	61.94	24	34	8.2e-05	K	NGFLLDGFPR	T
7	gi|335309396	PREDICTED: adenylate kinase 2, mitochondrial-like isoform 1 [Sus scrofa]	532	15	1	146175	1	1	1	568.598	1135.18	2	1134.58	0.5986	0	69.84	29	34	1.5e-05	K	NGFLLDGFPR	T
8	gi|350583957	PREDICTED: keratin, type II cuticular Hb4 [Sus scrofa]	406	14	7	102583	6	1	0	453.953	905.892	2	905.461	0.431	0	16.09	31	34	3.6	R	FLEQQNK	L
8	gi|350583957	PREDICTED: keratin, type II cuticular Hb4 [Sus scrofa]	406	14	7	112778	1	1	0	488.511	975.007	2	974.406	0.601	1	20.62	30	34	1.2	-	MSCRSYR	V
8	gi|350583957	PREDICTED: keratin, type II cuticular Hb4 [Sus scrofa]	406	14	7	112779	1	1	0	488.511	975.008	2	974.406	0.6014	1	13.2	20	34	6.5	-	MSCRSYR	V
8	gi|350583957	PREDICTED: keratin, type II cuticular Hb4 [Sus scrofa]	406	14	7	131007	1	1	1	533.96	1065.91	2	1064.53	1.3764	0	23.4	32	34	0.65	K	WSFLQEQK	G
8	gi|350583957	PREDICTED: keratin, type II cuticular Hb4 [Sus scrofa]	406	14	7	133550	1	1	0	541.226	1080.44	2	1081.59	-1.154	1	28.04	34	34	0.24	K	FASFIDKVR	F
8	gi|350583957	PREDICTED: keratin, type II cuticular Hb4 [Sus scrofa]	406	14	7	133898	1	1	0	541.49	1080.96	2	1081.59	-0.6274	1	28.34	25	33	0.17	K	FASFIDKVR	F
8	gi|350583957	PREDICTED: keratin, type II cuticular Hb4 [Sus scrofa]	406	14	7	134753	2	1	0	362.867	1085.58	3	1086.6	-1.0238	1	14.82	29	35	5.9	K	EQIKTLNNK	F
8	gi|350583957	PREDICTED: keratin, type II cuticular Hb4 [Sus scrofa]	406	14	7	141324	8	1	1	558.408	1114.8	2	1113.61	1.1879	1	13.44	32	35	7.8	R	RLLEGEEIR	I
8	gi|350583957	PREDICTED: keratin, type II cuticular Hb4 [Sus scrofa]	406	14	7	151750	1	1	1	582.988	1163.96	2	1163.62	0.3422	1	59.72	29	34	0.00016	K	KYEEEVVLR	A
8	gi|350583957	PREDICTED: keratin, type II cuticular Hb4 [Sus scrofa]	406	14	7	151792	1	1	1	583.076	1164.14	2	1163.62	0.5186	1	66.55		33	2.6e-05	K	KYEEEVVLR	A
8	gi|350583957	PREDICTED: keratin, type II cuticular Hb4 [Sus scrofa]	406	14	7	158794	1	1	1	598.713	1195.41	2	1195.57	-0.1531	0	46.34	27	34	0.0034	R	SVISFGSCSPR	I
8	gi|350583957	PREDICTED: keratin, type II cuticular Hb4 [Sus scrofa]	406	14	7	158831	1	1	1	598.901	1195.79	2	1195.57	0.2227	0	47.76	26	34	0.0025	R	SVISFGSCSPR	I
8	gi|350583957	PREDICTED: keratin, type II cuticular Hb4 [Sus scrofa]	406	14	7	173679	1	1	1	629.492	1256.97	2	1255.68	1.2925	0	52.88		34	0.00077	K	LADLEGALQQAK	Q
8	gi|350583957	PREDICTED: keratin, type II cuticular Hb4 [Sus scrofa]	406	14	7	173708	1	1	1	629.538	1257.06	2	1255.68	1.3849	0	51.5		34	0.0009	K	LADLEGALQQAK	Q
8	gi|350583957	PREDICTED: keratin, type II cuticular Hb4 [Sus scrofa]	406	14	7	179810	1	1	1	643.096	1284.18	2	1284.69	-0.5159	0	84.16	31	32	3.7e-07	R	DLNVDGIIADIK	A
8	gi|350583957	PREDICTED: keratin, type II cuticular Hb4 [Sus scrofa]	406	14	7	180043	1	1	1	643.344	1284.67	2	1284.69	-0.0193	0	77.69		34	2.4e-06	R	DLNVDGIIADIK	A
8	gi|350583957	PREDICTED: keratin, type II cuticular Hb4 [Sus scrofa]	406	14	7	180062	1	1	1	643.35	1284.69	2	1284.69	-0.0065	0	20.14	18	34	1.4	R	DLNVDGIIADIK	A
8	gi|350583957	PREDICTED: keratin, type II cuticular Hb4 [Sus scrofa]	406	14	7	180128	1	1	1	643.375	1284.74	2	1284.69	0.0437	0	31.23	20	34	0.11	R	DLNVDGIIADIK	A
8	gi|350583957	PREDICTED: keratin, type II cuticular Hb4 [Sus scrofa]	406	14	7	270291	1	1	1	865.976	1729.94	2	1730.86	-0.9255	0	22.71	22	33	0.61	R	GGVVCGPDALVTSSGLSR	G
8	gi|350583957	PREDICTED: keratin, type II cuticular Hb4 [Sus scrofa]	406	14	7	285946	1	1	1	912.084	1822.15	2	1821.93	0.2266	0	39.56	18	33	0.013	R	SNLEPLFENYITNLR	H
8	gi|350583957	PREDICTED: keratin, type II cuticular Hb4 [Sus scrofa]	406	14	7	285949	1	1	1	912.087	1822.16	2	1821.93	0.2332	0	33.01	22	33	0.06	R	SNLEPLFENYITNLR	H
8	gi|350583957	PREDICTED: keratin, type II cuticular Hb4 [Sus scrofa]	406	14	7	285974	1	1	1	912.149	1822.28	2	1821.93	0.3584	0	58.57	22	33	0.00014	R	SNLEPLFENYITNLR	H
8	gi|350583957	PREDICTED: keratin, type II cuticular Hb4 [Sus scrofa]	406	14	7	320033	1	1	1	1036.09	2070.17	2	2069.95	0.2271	0	59.84	24	32	0.0001	K	SDMEANVDSLTQEIDFLK	T
8	gi|350583957	PREDICTED: keratin, type II cuticular Hb4 [Sus scrofa]	406	14	7	335244	1	1	1	742.556	2224.65	3	2225.13	-0.4832	1	35.3	17	31	0.02	R	AKLEAAVAQAEQQGEAALNDAK	S
8	gi|350583957	PREDICTED: keratin, type II cuticular Hb4 [Sus scrofa]	406	14	7	335308	1	1	1	742.701	2225.08	3	2225.13	-0.0482	1	32.66		32	0.048	R	AKLEAAVAQAEQQGEAALNDAK	S	0.56
9	gi|350583970	PREDICTED: keratin, type II cytoskeletal 75-like [Sus scrofa]	380	12	2	102583	6	0	0	453.953	905.892	2	905.461	0.431	0	16.09	31	34	3.6	R	FLEQQNK	V
9	gi|350583970	PREDICTED: keratin, type II cytoskeletal 75-like [Sus scrofa]	380	12	2	133550	1	0	0	541.226	1080.44	2	1081.59	-1.154	1	28.04	34	34	0.24	K	FASFIDKVR	F
9	gi|350583970	PREDICTED: keratin, type II cytoskeletal 75-like [Sus scrofa]	380	12	2	133898	1	0	0	541.49	1080.96	2	1081.59	-0.6274	1	28.34	25	33	0.17	K	FASFIDKVR	F
9	gi|350583970	PREDICTED: keratin, type II cytoskeletal 75-like [Sus scrofa]	380	12	2	134753	2	0	0	362.867	1085.58	3	1086.6	-1.0238	1	14.82	29	35	5.9	R	EQIKTLNNK	F
9	gi|350583970	PREDICTED: keratin, type II cytoskeletal 75-like [Sus scrofa]	380	12	2	139745	2	1	1	370.131	1107.37	3	1107.6	-0.2319	1	13.1	27	35	7.9	R	SLYNLGGTKR	V
9	gi|350583970	PREDICTED: keratin, type II cytoskeletal 75-like [Sus scrofa]	380	12	2	147141	2	1	1	571.719	1141.42	2	1142.62	-1.1954	0	18.42	25	35	2.4	K	LVDLEDALQK	A
9	gi|350583970	PREDICTED: keratin, type II cytoskeletal 75-like [Sus scrofa]	380	12	2	147172	2	1	1	572.007	1142	2	1142.62	-0.6184	0	17.47	32	34	2.5	K	LVDLEDALQK	A
9	gi|350583970	PREDICTED: keratin, type II cytoskeletal 75-like [Sus scrofa]	380	12	2	149104	1	1	0	385.162	1152.47	3	1153.54	-1.0784	1	13.32	23	34	7.1	K	KDVDAAYMNK	M
9	gi|350583970	PREDICTED: keratin, type II cytoskeletal 75-like [Sus scrofa]	380	12	2	184296	1	1	1	651.664	1301.31	2	1301.71	-0.3942	0	83.36	33	34	6.4e-07	R	SLDLDSIIAEVK	A
9	gi|350583970	PREDICTED: keratin, type II cytoskeletal 75-like [Sus scrofa]	380	12	2	184324	1	1	1	651.757	1301.5	2	1301.71	-0.2088	0	100.64	32	34	1.3e-08	R	SLDLDSIIAEVK	A
9	gi|350583970	PREDICTED: keratin, type II cytoskeletal 75-like [Sus scrofa]	380	12	2	184332	1	1	1	651.784	1301.55	2	1301.71	-0.1552	0	58.1	22	34	0.00023	R	SLDLDSIIAEVK	A
9	gi|350583970	PREDICTED: keratin, type II cytoskeletal 75-like [Sus scrofa]	380	12	2	184427	1	1	1	652.124	1302.23	2	1301.71	0.5254	0	56.12	30	33	0.00028	R	SLDLDSIIAEVK	A
9	gi|350583970	PREDICTED: keratin, type II cytoskeletal 75-like [Sus scrofa]	380	12	2	184450	1	1	1	652.18	1302.35	2	1301.71	0.6384	0	88.46	31	34	2.1e-07	R	SLDLDSIIAEVK	A
9	gi|350583970	PREDICTED: keratin, type II cytoskeletal 75-like [Sus scrofa]	380	12	2	184463	1	1	1	652.223	1302.43	2	1301.71	0.7242	0	53.6	30	34	0.00066	R	SLDLDSIIAEVK	A
9	gi|350583970	PREDICTED: keratin, type II cytoskeletal 75-like [Sus scrofa]	380	12	2	184476	1	1	1	1303.48	1302.47	1	1301.71	0.7669	0	32.6	17	34	0.084	R	SLDLDSIIAEVK	A
9	gi|350583970	PREDICTED: keratin, type II cytoskeletal 75-like [Sus scrofa]	380	12	2	184507	1	1	1	652.32	1302.62	2	1301.71	0.9168	0	20.05	26	34	1.5	R	SLDLDSIIAEVK	A
9	gi|350583970	PREDICTED: keratin, type II cytoskeletal 75-like [Sus scrofa]	380	12	2	184513	1	1	1	652.338	1302.66	2	1301.71	0.9546	0	35.33	27	34	0.045	R	SLDLDSIIAEVK	A
9	gi|350583970	PREDICTED: keratin, type II cytoskeletal 75-like [Sus scrofa]	380	12	2	184559	1	1	1	652.45	1302.88	2	1301.71	1.1772	0	16.12	23	34	3.7	R	SLDLDSIIAEVK	A
9	gi|350583970	PREDICTED: keratin, type II cytoskeletal 75-like [Sus scrofa]	380	12	2	184615	1	1	1	652.556	1303.1	2	1301.71	1.389	0	49.37	25	33	0.0014	R	SLDLDSIIAEVK	A
9	gi|350583970	PREDICTED: keratin, type II cytoskeletal 75-like [Sus scrofa]	380	12	2	187388	1	1	1	660.497	1318.98	2	1319.71	-0.7292	1	13.24	25	34	7.1	R	TAAENEFVALKK	D
9	gi|350583970	PREDICTED: keratin, type II cytoskeletal 75-like [Sus scrofa]	380	12	2	221384	3	0	0	738.544	1475.07	2	1475.8	-0.7247	1	40.12		34	0.012	R	FLEQQNKVLETK	W
9	gi|350583970	PREDICTED: keratin, type II cytoskeletal 75-like [Sus scrofa]	380	12	2	221393	3	0	0	738.563	1475.11	2	1475.8	-0.6865	1	45.61		33	0.0033	R	FLEQQNKVLETK	W
9	gi|350583970	PREDICTED: keratin, type II cytoskeletal 75-like [Sus scrofa]	380	12	2	221396	3	0	0	738.568	1475.12	2	1475.8	-0.6769	1	42.37		33	0.0069	R	FLEQQNKVLETK	W
9	gi|350583970	PREDICTED: keratin, type II cytoskeletal 75-like [Sus scrofa]	380	12	2	221429	4	0	0	738.626	1475.24	2	1475.8	-0.5611	1	41.24		32	0.0071	R	FLEQQNKVLETK	W
9	gi|350583970	PREDICTED: keratin, type II cytoskeletal 75-like [Sus scrofa]	380	12	2	221754	1	1	0	739.417	1476.82	2	1475.8	1.0205	1	17.13	20	34	2.7	R	FLEQQNKVLETK	W	0.24
10	gi|114703738	deleted in malignant brain tumors 1 protein precursor [Sus scrofa]	339	9	3	77288	4	1	1	365.38	728.745	2	729.377	-0.6317	0	14.4	29	36	7.4	R	LVNGGDR	C
10	gi|114703738	deleted in malignant brain tumors 1 protein precursor [Sus scrofa]	339	9	3	123487	1	1	1	512.441	1022.87	2	1022.54	0.327	0	64.26		34	5.8e-05	R	FISDVSVTR	A
10	gi|114703738	deleted in malignant brain tumors 1 protein precursor [Sus scrofa]	339	9	3	123493	1	1	1	512.451	1022.89	2	1022.54	0.3472	0	58.39		34	0.00022	R	FISDVSVTR	A
10	gi|114703738	deleted in malignant brain tumors 1 protein precursor [Sus scrofa]	339	9	3	150443	1	1	1	1157.89	1156.88	1	1156.5	0.3812	0	17.51	23	35	3	K	DLNMYVSCR	M
10	gi|114703738	deleted in malignant brain tumors 1 protein precursor [Sus scrofa]	339	9	3	207987	1	1	1	472.06	1413.16	3	1413.65	-0.4923	1	13.6	23	33	4.6	K	MVVCRAFDSSSR	C
10	gi|114703738	deleted in malignant brain tumors 1 protein precursor [Sus scrofa]	339	9	3	208118	1	1	1	472.326	1413.96	3	1413.65	0.3069	1	14.1	17	34	5.5	K	MVVCRAFDSSSR	C
10	gi|114703738	deleted in malignant brain tumors 1 protein precursor [Sus scrofa]	339	9	3	223611	1	1	1	744.245	1486.47	2	1486.78	-0.3036	0	74.95	30	34	4.4e-06	R	FGQGSGPILLDDLR	C
10	gi|114703738	deleted in malignant brain tumors 1 protein precursor [Sus scrofa]	339	9	3	223708	1	1	1	744.594	1487.17	2	1486.78	0.3962	0	61.61	28	33	7.6e-05	R	FGQGSGPILLDDLR	C
10	gi|114703738	deleted in malignant brain tumors 1 protein precursor [Sus scrofa]	339	9	3	223714	1	1	1	744.607	1487.2	2	1486.78	0.4216	0	77.5	31	33	1.8e-06	R	FGQGSGPILLDDLR	C
10	gi|114703738	deleted in malignant brain tumors 1 protein precursor [Sus scrofa]	339	9	3	223721	1	1	1	744.631	1487.25	2	1486.78	0.4704	0	26.76	21	32	0.21	R	FGQGSGPILLDDLR	C
10	gi|114703738	deleted in malignant brain tumors 1 protein precursor [Sus scrofa]	339	9	3	223770	1	1	1	744.752	1487.49	2	1486.78	0.7106	0	35.4	21	34	0.039	R	FGQGSGPILLDDLR	C
10	gi|114703738	deleted in malignant brain tumors 1 protein precursor [Sus scrofa]	339	9	3	223774	1	1	1	744.766	1487.52	2	1486.78	0.739	0	28.35	19	34	0.2	R	FGQGSGPILLDDLR	C
10	gi|114703738	deleted in malignant brain tumors 1 protein precursor [Sus scrofa]	339	9	3	223794	1	1	1	744.857	1487.7	2	1486.78	0.9216	0	71.07	29	34	1.1e-05	R	FGQGSGPILLDDLR	C
10	gi|114703738	deleted in malignant brain tumors 1 protein precursor [Sus scrofa]	339	9	3	223874	1	1	1	745.068	1488.12	2	1486.78	1.3444	0	68.98	33	33	1.5e-05	R	FGQGSGPILLDDLR	C
10	gi|114703738	deleted in malignant brain tumors 1 protein precursor [Sus scrofa]	339	9	3	228754	1	1	1	757.5	1512.99	2	1512.83	0.1556	0	13.91	19	34	5.2	R	FGQGLGPILLDDLR	C
10	gi|114703738	deleted in malignant brain tumors 1 protein precursor [Sus scrofa]	339	9	3	229115	2	1	1	505.459	1513.36	3	1512.83	0.5257	0	15.99	28	33	2.6	R	FGQGLGPILLDDLR	C
10	gi|114703738	deleted in malignant brain tumors 1 protein precursor [Sus scrofa]	339	9	3	229160	2	1	1	505.508	1513.5	3	1512.83	0.6718	0	16.1	30	34	3.3	R	FGQGLGPILLDDLR	C
10	gi|114703738	deleted in malignant brain tumors 1 protein precursor [Sus scrofa]	339	9	3	238191	1	1	1	779.638	1557.26	2	1556.67	0.5867	0	50.04	26	32	0.00094	K	DETYQSYSQPSPR	I	0.07
11	gi|335297667	PREDICTED: keratin, type I cuticular Ha6 isoform 2 [Sus scrofa]	327	11	5	89216	1	1	0	404.51	807.006	2	806.392	0.6136	0	52.11		34	0.00091	K	LAADDFR	T
11	gi|335297667	PREDICTED: keratin, type I cuticular Ha6 isoform 2 [Sus scrofa]	327	11	5	133873	1	1	1	541.449	1080.88	2	1080.55	0.3385	0	35.91	22	34	0.037	R	LESEIATYR	R
11	gi|335297667	PREDICTED: keratin, type I cuticular Ha6 isoform 2 [Sus scrofa]	327	11	5	138690	1	1	0	553.092	1104.17	2	1103.59	0.5806	0	31.77	24	34	0.1	R	ILDELTLCK	A
11	gi|335297667	PREDICTED: keratin, type I cuticular Ha6 isoform 2 [Sus scrofa]	327	11	5	141070	1	1	1	557.506	1113	2	1113.65	-0.6533	1	17.83	26	33	2	K	ILITKADNAR	L
11	gi|335297667	PREDICTED: keratin, type I cuticular Ha6 isoform 2 [Sus scrofa]	327	11	5	185417	1	1	1	654.332	1306.65	2	1307.68	-1.0337	1	39.78		34	0.015	K	ARLESEIATYR	R
11	gi|335297667	PREDICTED: keratin, type I cuticular Ha6 isoform 2 [Sus scrofa]	327	11	5	185422	1	1	1	654.362	1306.71	2	1307.68	-0.9739	1	51.83	33	34	0.00093	K	ARLESEIATYR	R
11	gi|335297667	PREDICTED: keratin, type I cuticular Ha6 isoform 2 [Sus scrofa]	327	11	5	195358	1	1	1	679.487	1356.96	2	1356.74	0.2227	0	83.51	28	34	6.6e-07	R	VPSLAGVGGSASSIR	L
11	gi|335297667	PREDICTED: keratin, type I cuticular Ha6 isoform 2 [Sus scrofa]	327	11	5	195440	1	1	1	679.604	1357.19	2	1356.74	0.4577	0	63.98	24	33	4.2e-05	R	VPSLAGVGGSASSIR	L
11	gi|335297667	PREDICTED: keratin, type I cuticular Ha6 isoform 2 [Sus scrofa]	327	11	5	198836	2	1	0	686.049	1370.08	2	1370.73	-0.6438	1	14.82	28	33	4	R	QLVEADTNGLRR	I
11	gi|335297667	PREDICTED: keratin, type I cuticular Ha6 isoform 2 [Sus scrofa]	327	11	5	199220	1	1	0	458.212	1371.61	3	1370.73	0.8867	1	21.73	22	34	1	R	QLVEADTNGLRR	I
11	gi|335297667	PREDICTED: keratin, type I cuticular Ha6 isoform 2 [Sus scrofa]	327	11	5	244231	1	1	1	797.63	1593.24	2	1592.84	0.4041	0	21.64		32	0.64	R	LNVEVDAAPPVDLNK	I
11	gi|335297667	PREDICTED: keratin, type I cuticular Ha6 isoform 2 [Sus scrofa]	327	11	5	244260	1	1	1	797.685	1593.36	2	1592.84	0.5141	0	30.44	18	32	0.085	R	LNVEVDAAPPVDLNK	I
11	gi|335297667	PREDICTED: keratin, type I cuticular Ha6 isoform 2 [Sus scrofa]	327	11	5	266351	1	1	1	853.617	1705.22	2	1705.8	-0.5828	0	53.9	22	33	0.00043	K	LPAHPCATECQPAVR	V
11	gi|335297667	PREDICTED: keratin, type I cuticular Ha6 isoform 2 [Sus scrofa]	327	11	5	266428	1	1	1	569.583	1705.73	3	1705.8	-0.0748	0	50.19	25	33	0.0011	K	LPAHPCATECQPAVR	V
11	gi|335297667	PREDICTED: keratin, type I cuticular Ha6 isoform 2 [Sus scrofa]	327	11	5	266442	1	1	1	853.933	1705.85	2	1705.8	0.0492	0	52.45	25	33	0.00065	K	LPAHPCATECQPAVR	V
11	gi|335297667	PREDICTED: keratin, type I cuticular Ha6 isoform 2 [Sus scrofa]	327	11	5	266455	1	1	1	854.01	1706.01	2	1705.8	0.2022	0	49.06	25	33	0.0014	K	LPAHPCATECQPAVR	V
11	gi|335297667	PREDICTED: keratin, type I cuticular Ha6 isoform 2 [Sus scrofa]	327	11	5	266549	1	1	1	569.964	1706.87	3	1705.8	1.0676	0	42.86	23	33	0.0059	K	LPAHPCATECQPAVR	V	0.63
12	gi|148747492	keratin, type II cytoskeletal 2 epidermal [Sus scrofa]	320	9	3	101013	1	1	1	449.365	896.716	2	897.409	-0.6929	0	17.84	30	34	2.5	R	GFGGGGFGSR	S
12	gi|148747492	keratin, type II cytoskeletal 2 epidermal [Sus scrofa]	320	9	3	101039	2	1	1	449.464	896.913	2	897.409	-0.4965	0	26.52		33	0.24	R	GFGGGGFGSR	S
12	gi|148747492	keratin, type II cytoskeletal 2 epidermal [Sus scrofa]	320	9	3	110898	2	1	1	479.65	957.285	2	958.497	-1.2118	0	15.81	30	35	5.1	K	ELEEALQK	A
12	gi|148747492	keratin, type II cytoskeletal 2 epidermal [Sus scrofa]	320	9	3	134753	2	0	0	362.867	1085.58	3	1086.6	-1.0238	1	14.82	29	35	5.9	R	EQIKTLNNK	F
12	gi|148747492	keratin, type II cytoskeletal 2 epidermal [Sus scrofa]	320	9	3	154393	1	1	1	589.996	1177.98	2	1178.59	-0.6155	1	15.38	21	34	4.2	K	KDVDNAYINK	A
12	gi|148747492	keratin, type II cytoskeletal 2 epidermal [Sus scrofa]	320	9	3	154394	1	1	1	590	1177.99	2	1178.59	-0.6073	1	15.48	24	34	4	K	KDVDNAYINK	A
12	gi|148747492	keratin, type II cytoskeletal 2 epidermal [Sus scrofa]	320	9	3	154409	1	1	1	590.089	1178.16	2	1178.59	-0.4305	1	13.61	20	33	5.3	K	KDVDNAYINK	A
12	gi|148747492	keratin, type II cytoskeletal 2 epidermal [Sus scrofa]	320	9	3	172610	1	1	1	627.886	1253.76	2	1253.6	0.1582	0	92.3	33	34	8.4e-08	R	GFSSGSAVVSGGSR	G
12	gi|148747492	keratin, type II cytoskeletal 2 epidermal [Sus scrofa]	320	9	3	172612	1	1	1	627.891	1253.77	2	1253.6	0.1682	0	95.15	29	34	4.4e-08	R	GFSSGSAVVSGGSR	G
12	gi|148747492	keratin, type II cytoskeletal 2 epidermal [Sus scrofa]	320	9	3	190685	1	1	1	669.096	1336.18	2	1335.7	0.4748	1	51.09	32	33	0.0008	R	TAAENDFVTLKK	D
12	gi|148747492	keratin, type II cytoskeletal 2 epidermal [Sus scrofa]	320	9	3	221159	1	0	1	738.025	1474.04	2	1474.81	-0.7793	1	56.37		34	0.0003	R	FLEQQNQVLKTK	W
12	gi|148747492	keratin, type II cytoskeletal 2 epidermal [Sus scrofa]	320	9	3	221175	1	0	1	738.059	1474.1	2	1474.81	-0.7105	1	39.87	26	33	0.012	R	FLEQQNQVLKTK	W
12	gi|148747492	keratin, type II cytoskeletal 2 epidermal [Sus scrofa]	320	9	3	221384	2	0	1	738.544	1475.07	2	1474.81	0.2593	1	50.55		34	0.0011	R	FLEQQNQVLKTK	W
12	gi|148747492	keratin, type II cytoskeletal 2 epidermal [Sus scrofa]	320	9	3	221388	1	0	1	738.556	1475.1	2	1474.81	0.2825	1	25.36	27	33	0.36	R	FLEQQNQVLKTK	W
12	gi|148747492	keratin, type II cytoskeletal 2 epidermal [Sus scrofa]	320	9	3	221393	1	0	1	738.563	1475.11	2	1474.81	0.2975	1	71.4		33	8.8e-06	R	FLEQQNQVLKTK	W
12	gi|148747492	keratin, type II cytoskeletal 2 epidermal [Sus scrofa]	320	9	3	221396	1	0	1	738.568	1475.12	2	1474.81	0.3071	1	49.19		33	0.0014	R	FLEQQNQVLKTK	W
12	gi|148747492	keratin, type II cytoskeletal 2 epidermal [Sus scrofa]	320	9	3	221423	1	0	1	738.607	1475.2	2	1474.81	0.3857	1	20.24	29	32	0.93	R	FLEQQNQVLKTK	W
12	gi|148747492	keratin, type II cytoskeletal 2 epidermal [Sus scrofa]	320	9	3	221429	1	0	1	738.626	1475.24	2	1474.81	0.4229	1	68.68		32	1.3e-05	R	FLEQQNQVLKTK	W
12	gi|148747492	keratin, type II cytoskeletal 2 epidermal [Sus scrofa]	320	9	3	221477	1	0	1	738.769	1475.52	2	1474.81	0.7099	1	24.38	27	34	0.5	R	FLEQQNQVLKTK	W	0.16
13	gi|350580796	PREDICTED: hypothetical protein LOC100522363 [Sus scrofa]	305	10	4	58920	5	1	0	303.301	604.587	2	604.37	0.217	0	16.95	34	37	5.4	R	VALFR	N
13	gi|350580796	PREDICTED: hypothetical protein LOC100522363 [Sus scrofa]	305	10	4	58921	7	1	0	303.369	604.723	2	604.37	0.3538	0	16.93		36	4.2	R	VALFR	N
13	gi|350580796	PREDICTED: hypothetical protein LOC100522363 [Sus scrofa]	305	10	4	110934	1	1	1	320.27	957.788	3	956.483	1.3048	1	14.79	25	35	6.4	R	RSSGFFTR	V
13	gi|350580796	PREDICTED: hypothetical protein LOC100522363 [Sus scrofa]	305	10	4	146120	1	1	1	568.449	1134.88	2	1135.53	-0.6431	0	30.79	22	35	0.14	R	SISQNGYDPR	Q
13	gi|350580796	PREDICTED: hypothetical protein LOC100522363 [Sus scrofa]	305	10	4	146166	1	1	1	568.583	1135.15	2	1135.53	-0.3745	0	29.5	23	34	0.15	R	SISQNGYDPR	Q
13	gi|350580796	PREDICTED: hypothetical protein LOC100522363 [Sus scrofa]	305	10	4	146169	1	1	1	568.589	1135.16	2	1135.53	-0.3631	0	34.82	26	34	0.046	R	SISQNGYDPR	Q
13	gi|350580796	PREDICTED: hypothetical protein LOC100522363 [Sus scrofa]	305	10	4	146195	1	1	1	568.648	1135.28	2	1135.53	-0.2435	0	25.93	28	35	0.43	R	SISQNGYDPR	Q
13	gi|350580796	PREDICTED: hypothetical protein LOC100522363 [Sus scrofa]	305	10	4	153453	1	1	1	586.434	1170.85	2	1170.59	0.2687	0	43.96		35	0.0065	R	FVLTAASCFR	G
13	gi|350580796	PREDICTED: hypothetical protein LOC100522363 [Sus scrofa]	305	10	4	153493	1	1	1	586.578	1171.14	2	1170.59	0.5551	0	59.71	30	33	0.00013	R	FVLTAASCFR	G
13	gi|350580796	PREDICTED: hypothetical protein LOC100522363 [Sus scrofa]	305	10	4	242852	1	1	1	793.26	1584.51	2	1584.84	-0.3341	1	16.17	21	34	3.1	R	ASLMALGSPIEAGRGR	G
13	gi|350580796	PREDICTED: hypothetical protein LOC100522363 [Sus scrofa]	305	10	4	246629	1	1	1	802.432	1602.85	2	1602.84	0.0095	0	34.08	22	33	0.049	R	AQPQEFPFLASIQK	Q
13	gi|350580796	PREDICTED: hypothetical protein LOC100522363 [Sus scrofa]	305	10	4	246912	1	1	1	803.022	1604.03	2	1602.84	1.1895	0	15.32	17	33	3.6	R	AQPQEFPFLASIQK	Q
13	gi|350580796	PREDICTED: hypothetical protein LOC100522363 [Sus scrofa]	305	10	4	246930	1	1	1	803.112	1604.21	2	1602.84	1.3681	0	38.08	28	33	0.016	R	AQPQEFPFLASIQK	Q
13	gi|350580796	PREDICTED: hypothetical protein LOC100522363 [Sus scrofa]	305	10	4	291130	1	1	1	930.025	1858.04	2	1858.97	-0.9371	0	33.51		33	0.048	R	GTPLVCNGLAQGVASFLR	R
13	gi|350580796	PREDICTED: hypothetical protein LOC100522363 [Sus scrofa]	305	10	4	291448	1	1	1	930.56	1859.11	2	1858.97	0.1329	0	27.2		33	0.21	R	GTPLVCNGLAQGVASFLR	R
13	gi|350580796	PREDICTED: hypothetical protein LOC100522363 [Sus scrofa]	305	10	4	291496	1	1	1	930.705	1859.4	2	1858.97	0.4231	0	83.53	30	31	3.5e-07	R	GTPLVCNGLAQGVASFLR	R
13	gi|350580796	PREDICTED: hypothetical protein LOC100522363 [Sus scrofa]	305	10	4	291515	1	1	1	930.843	1859.67	2	1858.97	0.6991	0	94.52	27	33	3.7e-08	R	GTPLVCNGLAQGVASFLR	R
13	gi|350580796	PREDICTED: hypothetical protein LOC100522363 [Sus scrofa]	305	10	4	291549	1	1	1	930.997	1859.98	2	1858.97	1.0069	0	78.37	23	33	1.5e-06	R	GTPLVCNGLAQGVASFLR	R
13	gi|350580796	PREDICTED: hypothetical protein LOC100522363 [Sus scrofa]	305	10	4	291553	1	1	1	621.014	1860.02	3	1858.97	1.0463	0	33.61	17	33	0.046	R	GTPLVCNGLAQGVASFLR	R	0.3
14	gi|311267330	PREDICTED: keratin, type I cytoskeletal 10-like [Sus scrofa]	282	10	5	89216	1	0	0	404.51	807.006	2	806.392	0.6136	0	52.11		34	0.00091	R	LAADDFR	M
14	gi|311267330	PREDICTED: keratin, type I cytoskeletal 10-like [Sus scrofa]	282	10	5	130295	1	1	0	355.76	1064.26	3	1063.6	0.655	1	34.37	34	35	0.062	R	LASYLDKVR	A
14	gi|311267330	PREDICTED: keratin, type I cytoskeletal 10-like [Sus scrofa]	282	10	5	130737	1	1	0	355.923	1064.75	3	1063.6	1.1455	1	35.65	31	35	0.046	R	LASYLDKVR	A
14	gi|311267330	PREDICTED: keratin, type I cytoskeletal 10-like [Sus scrofa]	282	10	5	139854	1	1	0	555.065	1108.11	2	1108.48	-0.3677	0	13.05	22	33	5.6	R	DAEAWFNEK	S
14	gi|311267330	PREDICTED: keratin, type I cytoskeletal 10-like [Sus scrofa]	282	10	5	140015	1	1	0	555.25	1108.49	2	1108.48	0.0039	0	28.83		34	0.2	R	DAEAWFNEK	S
14	gi|311267330	PREDICTED: keratin, type I cytoskeletal 10-like [Sus scrofa]	282	10	5	151813	1	1	1	583.11	1164.21	2	1164.58	-0.3712	0	18.05	14	34	2.2	R	LENEIQTYR	S
14	gi|311267330	PREDICTED: keratin, type I cytoskeletal 10-like [Sus scrofa]	282	10	5	151910	1	1	1	583.264	1164.51	2	1164.58	-0.064	0	38.37		35	0.023	R	LENEIQTYR	S
14	gi|311267330	PREDICTED: keratin, type I cytoskeletal 10-like [Sus scrofa]	282	10	5	151993	1	1	1	583.337	1164.66	2	1164.58	0.083	0	48.13		35	0.0024	R	LENEIQTYR	S
14	gi|311267330	PREDICTED: keratin, type I cytoskeletal 10-like [Sus scrofa]	282	10	5	165991	1	1	1	409.247	1224.72	3	1224.59	0.1293	0	18.05	26	34	2.2	R	VLSSMVESETK	K
14	gi|311267330	PREDICTED: keratin, type I cytoskeletal 10-like [Sus scrofa]	282	10	5	166064	1	1	1	613.523	1225.03	2	1224.59	0.4405	0	16.29	21	33	2.6	R	VLSSMVESETK	K
14	gi|311267330	PREDICTED: keratin, type I cytoskeletal 10-like [Sus scrofa]	282	10	5	166103	1	1	1	409.449	1225.33	3	1224.59	0.735	0	19.17	26	34	1.7	R	VLSSMVESETK	K
14	gi|311267330	PREDICTED: keratin, type I cytoskeletal 10-like [Sus scrofa]	282	10	5	166125	1	1	1	409.499	1225.48	3	1224.59	0.8844	0	17.12	27	34	2.7	R	VLSSMVESETK	K
14	gi|311267330	PREDICTED: keratin, type I cytoskeletal 10-like [Sus scrofa]	282	10	5	183571	2	1	1	650.302	1298.59	2	1297.63	0.9564	1	13.06	26	34	7.3	R	MKYENEVTLR	Q
14	gi|311267330	PREDICTED: keratin, type I cytoskeletal 10-like [Sus scrofa]	282	10	5	183609	2	1	1	650.469	1298.92	2	1297.63	1.2898	1	13.12	25	34	7.2	R	MKYENEVTLR	Q
14	gi|311267330	PREDICTED: keratin, type I cytoskeletal 10-like [Sus scrofa]	282	10	5	183615	2	1	1	650.482	1298.95	2	1297.63	1.3152	1	13.15	27	34	7.1	R	MKYENEVTLR	Q
14	gi|311267330	PREDICTED: keratin, type I cytoskeletal 10-like [Sus scrofa]	282	10	5	195011	1	1	0	679.302	1356.59	2	1356.71	-0.1219	1	19.62	25	34	1.6	R	QSVEADINGLRR	V
14	gi|311267330	PREDICTED: keratin, type I cytoskeletal 10-like [Sus scrofa]	282	10	5	195135	1	1	0	679.352	1356.69	2	1356.71	-0.0215	1	26.98	25	34	0.3	R	QSVEADINGLRR	V
14	gi|311267330	PREDICTED: keratin, type I cytoskeletal 10-like [Sus scrofa]	282	10	5	195385	1	1	0	679.511	1357.01	2	1356.71	0.2973	1	18.88	28	34	1.8	R	QSVEADINGLRR	V
14	gi|311267330	PREDICTED: keratin, type I cytoskeletal 10-like [Sus scrofa]	282	10	5	195410	1	1	0	679.549	1357.08	2	1356.71	0.3727	1	17.81	23	34	2.1	R	QSVEADINGLRR	V
14	gi|311267330	PREDICTED: keratin, type I cytoskeletal 10-like [Sus scrofa]	282	10	5	195449	1	1	0	453.418	1357.23	3	1356.71	0.5227	1	19.97	19	33	1.1	R	QSVEADINGLRR	V
14	gi|311267330	PREDICTED: keratin, type I cytoskeletal 10-like [Sus scrofa]	282	10	5	195464	1	1	0	453.459	1357.36	3	1356.71	0.6454	1	29.62	28	34	0.16	R	QSVEADINGLRR	V
14	gi|311267330	PREDICTED: keratin, type I cytoskeletal 10-like [Sus scrofa]	282	10	5	195470	1	1	0	679.699	1357.38	2	1356.71	0.6721	1	26.15	28	34	0.36	R	QSVEADINGLRR	V
14	gi|311267330	PREDICTED: keratin, type I cytoskeletal 10-like [Sus scrofa]	282	10	5	195472	1	1	0	453.474	1357.4	3	1356.71	0.6907	1	28.38	23	34	0.22	R	QSVEADINGLRR	V
14	gi|311267330	PREDICTED: keratin, type I cytoskeletal 10-like [Sus scrofa]	282	10	5	197218	1	1	1	683.191	1364.37	2	1364.63	-0.2642	0	66.85	34	34	2.8e-05	R	SQYEQLAEQNR	R
14	gi|311267330	PREDICTED: keratin, type I cytoskeletal 10-like [Sus scrofa]	282	10	5	197343	1	1	1	683.422	1364.83	2	1364.63	0.1972	0	57.17	28	34	0.00027	R	SQYEQLAEQNR	R
14	gi|311267330	PREDICTED: keratin, type I cytoskeletal 10-like [Sus scrofa]	282	10	5	197416	1	1	1	683.539	1365.06	2	1364.63	0.4324	0	56.66	29	33	0.00027	R	SQYEQLAEQNR	R
14	gi|311267330	PREDICTED: keratin, type I cytoskeletal 10-like [Sus scrofa]	282	10	5	197417	1	1	1	683.541	1365.07	2	1364.63	0.435	0	56.76	31	33	0.00026	R	SQYEQLAEQNR	R
14	gi|311267330	PREDICTED: keratin, type I cytoskeletal 10-like [Sus scrofa]	282	10	5	197432	1	1	1	683.575	1365.14	2	1364.63	0.5032	0	39.09	25	33	0.013	R	SQYEQLAEQNR	R
14	gi|311267330	PREDICTED: keratin, type I cytoskeletal 10-like [Sus scrofa]	282	10	5	203176	1	1	1	696	1389.98	2	1389.67	0.3111	0	94.64	30	34	4.9e-08	K	QSLEASLAETEGR	Y
14	gi|311267330	PREDICTED: keratin, type I cytoskeletal 10-like [Sus scrofa]	282	10	5	213267	1	1	1	718.103	1434.19	2	1433.76	0.429	1	25.03	19	32	0.31	K	IRLENEIQTYR	S	0.5
15	gi|329744642	glyceraldehyde-3-phosphate dehydrogenase [Sus scrofa]	271	28	2	87371	1	1	0	398.081	794.148	2	794.411	-0.2632	0	39.05	29	34	0.019	K	LTGMAFR	V
15	gi|329744642	glyceraldehyde-3-phosphate dehydrogenase [Sus scrofa]	271	28	2	87377	1	1	0	795.191	794.184	1	794.411	-0.2272	0	17.13	22	34	3	K	LTGMAFR	V
15	gi|329744642	glyceraldehyde-3-phosphate dehydrogenase [Sus scrofa]	271	28	2	87382	1	1	0	795.259	794.251	1	794.411	-0.1594	0	22.88	27	34	0.81	K	LTGMAFR	V
15	gi|329744642	glyceraldehyde-3-phosphate dehydrogenase [Sus scrofa]	271	28	2	87383	1	1	0	795.276	794.269	1	794.411	-0.1421	0	22.82	26	34	0.82	K	LTGMAFR	V
15	gi|329744642	glyceraldehyde-3-phosphate dehydrogenase [Sus scrofa]	271	28	2	87385	1	1	0	398.148	794.282	2	794.411	-0.1292	0	25.24	26	34	0.47	K	LTGMAFR	V
15	gi|329744642	glyceraldehyde-3-phosphate dehydrogenase [Sus scrofa]	271	28	2	87387	1	1	0	795.312	794.305	1	794.411	-0.1061	0	18.27	25	34	2.3	K	LTGMAFR	V
15	gi|329744642	glyceraldehyde-3-phosphate dehydrogenase [Sus scrofa]	271	28	2	87388	1	1	0	795.318	794.311	1	794.411	-0.1001	0	28.12	27	34	0.24	K	LTGMAFR	V
15	gi|329744642	glyceraldehyde-3-phosphate dehydrogenase [Sus scrofa]	271	28	2	87389	1	1	0	795.32	794.313	1	794.411	-0.098	0	21.89	27	34	1	K	LTGMAFR	V
15	gi|329744642	glyceraldehyde-3-phosphate dehydrogenase [Sus scrofa]	271	28	2	87391	1	1	0	398.168	794.321	2	794.411	-0.0902	0	35.51	28	34	0.044	K	LTGMAFR	V
15	gi|329744642	glyceraldehyde-3-phosphate dehydrogenase [Sus scrofa]	271	28	2	87393	1	1	0	398.182	794.348	2	794.411	-0.0624	0	41.89	32	34	0.01	K	LTGMAFR	V
15	gi|329744642	glyceraldehyde-3-phosphate dehydrogenase [Sus scrofa]	271	28	2	87394	1	1	0	795.358	794.35	1	794.411	-0.0605	0	21.51	25	34	1.1	K	LTGMAFR	V
15	gi|329744642	glyceraldehyde-3-phosphate dehydrogenase [Sus scrofa]	271	28	2	87395	1	1	0	795.368	794.36	1	794.411	-0.0505	0	19.05	24	34	1.9	K	LTGMAFR	V
15	gi|329744642	glyceraldehyde-3-phosphate dehydrogenase [Sus scrofa]	271	28	2	87397	1	1	0	795.371	794.364	1	794.411	-0.0467	0	19.18	24	34	1.9	K	LTGMAFR	V
15	gi|329744642	glyceraldehyde-3-phosphate dehydrogenase [Sus scrofa]	271	28	2	87406	1	1	0	795.482	794.475	1	794.411	0.0643	0	23.36	27	34	0.72	K	LTGMAFR	V
15	gi|329744642	glyceraldehyde-3-phosphate dehydrogenase [Sus scrofa]	271	28	2	87408	1	1	0	398.25	794.486	2	794.411	0.0754	0	34.55	27	34	0.055	K	LTGMAFR	V
15	gi|329744642	glyceraldehyde-3-phosphate dehydrogenase [Sus scrofa]	271	28	2	87415	1	1	0	398.281	794.548	2	794.411	0.1376	0	41.24	29	34	0.012	K	LTGMAFR	V
15	gi|329744642	glyceraldehyde-3-phosphate dehydrogenase [Sus scrofa]	271	28	2	87420	1	1	0	398.309	794.603	2	794.411	0.192	0	46.7	33	34	0.0033	K	LTGMAFR	V
15	gi|329744642	glyceraldehyde-3-phosphate dehydrogenase [Sus scrofa]	271	28	2	87430	1	1	0	398.388	794.762	2	794.411	0.351	0	26.25	25	34	0.35	K	LTGMAFR	V
15	gi|329744642	glyceraldehyde-3-phosphate dehydrogenase [Sus scrofa]	271	28	2	87431	1	1	0	398.389	794.763	2	794.411	0.3524	0	37.62	30	34	0.025	K	LTGMAFR	V
15	gi|329744642	glyceraldehyde-3-phosphate dehydrogenase [Sus scrofa]	271	28	2	87441	1	1	0	398.419	794.824	2	794.411	0.4132	0	34.19	26	33	0.045	K	LTGMAFR	V
15	gi|329744642	glyceraldehyde-3-phosphate dehydrogenase [Sus scrofa]	271	28	2	87445	1	1	0	398.428	794.842	2	794.411	0.431	0	39.52	30	33	0.013	K	LTGMAFR	V
15	gi|329744642	glyceraldehyde-3-phosphate dehydrogenase [Sus scrofa]	271	28	2	87448	1	1	0	398.434	794.853	2	794.411	0.4422	0	34.48	26	33	0.039	K	LTGMAFR	V
15	gi|329744642	glyceraldehyde-3-phosphate dehydrogenase [Sus scrofa]	271	28	2	87452	1	1	0	398.445	794.874	2	794.411	0.4636	0	30.19	26	33	0.1	K	LTGMAFR	V
15	gi|329744642	glyceraldehyde-3-phosphate dehydrogenase [Sus scrofa]	271	28	2	87455	1	1	0	398.448	794.881	2	794.411	0.47	0	35.54	28	33	0.03	K	LTGMAFR	V
15	gi|329744642	glyceraldehyde-3-phosphate dehydrogenase [Sus scrofa]	271	28	2	87457	1	1	0	398.45	794.886	2	794.411	0.4754	0	27.57	26	33	0.18	K	LTGMAFR	V
15	gi|329744642	glyceraldehyde-3-phosphate dehydrogenase [Sus scrofa]	271	28	2	87459	1	1	0	398.451	794.888	2	794.411	0.4774	0	41.9	27	33	0.0068	K	LTGMAFR	V
15	gi|329744642	glyceraldehyde-3-phosphate dehydrogenase [Sus scrofa]	271	28	2	87461	1	1	0	398.456	794.898	2	794.411	0.4868	0	17.15	23	33	2	K	LTGMAFR	V
15	gi|329744642	glyceraldehyde-3-phosphate dehydrogenase [Sus scrofa]	271	28	2	87465	1	1	0	398.46	794.905	2	794.411	0.494	0	39.26	30	33	0.012	K	LTGMAFR	V
15	gi|329744642	glyceraldehyde-3-phosphate dehydrogenase [Sus scrofa]	271	28	2	87468	1	1	0	398.463	794.911	2	794.411	0.5004	0	32.49	25	33	0.058	K	LTGMAFR	V
15	gi|329744642	glyceraldehyde-3-phosphate dehydrogenase [Sus scrofa]	271	28	2	87469	1	1	0	398.465	794.915	2	794.411	0.5038	0	33.06	27	33	0.051	K	LTGMAFR	V
15	gi|329744642	glyceraldehyde-3-phosphate dehydrogenase [Sus scrofa]	271	28	2	87472	1	1	0	398.473	794.932	2	794.411	0.521	0	36.14	31	33	0.025	K	LTGMAFR	V
15	gi|329744642	glyceraldehyde-3-phosphate dehydrogenase [Sus scrofa]	271	28	2	87477	1	1	0	398.482	794.949	2	794.411	0.5384	0	23.01	24	33	0.54	K	LTGMAFR	V
15	gi|329744642	glyceraldehyde-3-phosphate dehydrogenase [Sus scrofa]	271	28	2	87607	1	1	0	398.626	795.237	2	794.411	0.8266	0	19.77	23	34	1.6	K	LTGMAFR	V
15	gi|329744642	glyceraldehyde-3-phosphate dehydrogenase [Sus scrofa]	271	28	2	87619	1	1	0	398.635	795.256	2	794.411	0.8456	0	15.05	23	34	4.8	K	LTGMAFR	V
15	gi|329744642	glyceraldehyde-3-phosphate dehydrogenase [Sus scrofa]	271	28	2	87632	1	1	0	398.657	795.299	2	794.411	0.8884	0	22.68	26	34	0.82	K	LTGMAFR	V
15	gi|329744642	glyceraldehyde-3-phosphate dehydrogenase [Sus scrofa]	271	28	2	87648	1	1	0	398.685	795.355	2	794.411	0.9438	0	20.74	25	34	1.3	K	LTGMAFR	V
15	gi|329744642	glyceraldehyde-3-phosphate dehydrogenase [Sus scrofa]	271	28	2	87676	1	1	0	398.72	795.426	2	794.411	1.0154	0	17.12	28	34	3	K	LTGMAFR	V
15	gi|329744642	glyceraldehyde-3-phosphate dehydrogenase [Sus scrofa]	271	28	2	87728	1	1	0	398.819	795.623	2	794.411	1.2124	0	14.82	22	34	5	K	LTGMAFR	V
15	gi|329744642	glyceraldehyde-3-phosphate dehydrogenase [Sus scrofa]	271	28	2	89500	2	1	0	405.976	809.937	2	810.406	-0.4684	0	14	27	32	3.9	K	LTGMAFR	V
15	gi|329744642	glyceraldehyde-3-phosphate dehydrogenase [Sus scrofa]	271	28	2	89522	1	1	0	811.268	810.26	1	810.406	-0.1453	0	17.51	25	34	2.5	K	LTGMAFR	V
15	gi|329744642	glyceraldehyde-3-phosphate dehydrogenase [Sus scrofa]	271	28	2	89527	2	1	0	811.283	810.275	1	810.406	-0.1306	0	14.46	28	34	5.1	K	LTGMAFR	V
15	gi|329744642	glyceraldehyde-3-phosphate dehydrogenase [Sus scrofa]	271	28	2	89533	1	1	0	811.329	810.321	1	810.406	-0.0844	0	17.41	26	34	2.6	K	LTGMAFR	V
15	gi|329744642	glyceraldehyde-3-phosphate dehydrogenase [Sus scrofa]	271	28	2	89536	1	1	0	811.336	810.328	1	810.406	-0.0773	0	15.58	25	34	4	K	LTGMAFR	V
15	gi|329744642	glyceraldehyde-3-phosphate dehydrogenase [Sus scrofa]	271	28	2	89545	1	1	0	811.395	810.388	1	810.406	-0.0176	0	24.36	26	34	0.52	K	LTGMAFR	V
15	gi|329744642	glyceraldehyde-3-phosphate dehydrogenase [Sus scrofa]	271	28	2	89548	2	1	0	811.403	810.396	1	810.406	-0.0098	0	17.6	31	34	2.5	K	LTGMAFR	V
15	gi|329744642	glyceraldehyde-3-phosphate dehydrogenase [Sus scrofa]	271	28	2	89594	1	1	0	406.391	810.768	2	810.406	0.3624	0	37.31		34	0.025	K	LTGMAFR	V
15	gi|329744642	glyceraldehyde-3-phosphate dehydrogenase [Sus scrofa]	271	28	2	89597	1	1	0	406.397	810.778	2	810.406	0.3726	0	40.93	33	34	0.011	K	LTGMAFR	V
15	gi|329744642	glyceraldehyde-3-phosphate dehydrogenase [Sus scrofa]	271	28	2	89603	1	1	0	406.404	810.793	2	810.406	0.387	0	37.01	30	34	0.025	K	LTGMAFR	V
15	gi|329744642	glyceraldehyde-3-phosphate dehydrogenase [Sus scrofa]	271	28	2	89604	1	1	0	406.405	810.795	2	810.406	0.3896	0	42.23		34	0.0076	K	LTGMAFR	V
15	gi|329744642	glyceraldehyde-3-phosphate dehydrogenase [Sus scrofa]	271	28	2	89606	1	1	0	406.41	810.806	2	810.406	0.3998	0	39.2	32	33	0.015	K	LTGMAFR	V
15	gi|329744642	glyceraldehyde-3-phosphate dehydrogenase [Sus scrofa]	271	28	2	89613	1	1	0	406.427	810.84	2	810.406	0.4338	0	43.75		33	0.0047	K	LTGMAFR	V
15	gi|329744642	glyceraldehyde-3-phosphate dehydrogenase [Sus scrofa]	271	28	2	89619	1	1	0	406.438	810.861	2	810.406	0.4556	0	36.7	31	33	0.023	K	LTGMAFR	V
15	gi|329744642	glyceraldehyde-3-phosphate dehydrogenase [Sus scrofa]	271	28	2	89626	1	1	0	406.458	810.902	2	810.406	0.4958	0	37.81		33	0.017	K	LTGMAFR	V
15	gi|329744642	glyceraldehyde-3-phosphate dehydrogenase [Sus scrofa]	271	28	2	89627	1	1	0	406.466	810.916	2	810.406	0.5106	0	35.76	31	33	0.027	K	LTGMAFR	V
15	gi|329744642	glyceraldehyde-3-phosphate dehydrogenase [Sus scrofa]	271	28	2	89629	1	1	0	406.468	810.922	2	810.406	0.5162	0	33.48	31	33	0.045	K	LTGMAFR	V
15	gi|329744642	glyceraldehyde-3-phosphate dehydrogenase [Sus scrofa]	271	28	2	89632	1	1	0	406.47	810.925	2	810.406	0.5192	0	33.52	31	32	0.044	K	LTGMAFR	V
15	gi|329744642	glyceraldehyde-3-phosphate dehydrogenase [Sus scrofa]	271	28	2	89644	1	1	0	406.515	811.016	2	810.406	0.6104	0	32.2	31	33	0.072	K	LTGMAFR	V
15	gi|329744642	glyceraldehyde-3-phosphate dehydrogenase [Sus scrofa]	271	28	2	97921	1	1	1	435.29	868.565	2	868.502	0.0636	0	34.38	31	34	0.055	K	VIPELNGK	L
15	gi|329744642	glyceraldehyde-3-phosphate dehydrogenase [Sus scrofa]	271	28	2	97935	1	1	1	435.373	868.732	2	868.502	0.2306	0	15.75	25	34	4	K	VIPELNGK	L
15	gi|329744642	glyceraldehyde-3-phosphate dehydrogenase [Sus scrofa]	271	28	2	97945	1	1	1	435.424	868.833	2	868.502	0.3316	0	16.39	25	34	3	K	VIPELNGK	L
15	gi|329744642	glyceraldehyde-3-phosphate dehydrogenase [Sus scrofa]	271	28	2	97961	1	1	1	435.466	868.918	2	868.502	0.416	0	35.01	28	33	0.032	K	VIPELNGK	L
15	gi|329744642	glyceraldehyde-3-phosphate dehydrogenase [Sus scrofa]	271	28	2	97963	1	1	1	435.467	868.92	2	868.502	0.4178	0	28.97	28	33	0.13	K	VIPELNGK	L
15	gi|329744642	glyceraldehyde-3-phosphate dehydrogenase [Sus scrofa]	271	28	2	97965	1	1	1	435.472	868.929	2	868.502	0.4268	0	32.42	25	33	0.059	K	VIPELNGK	L
15	gi|329744642	glyceraldehyde-3-phosphate dehydrogenase [Sus scrofa]	271	28	2	97974	1	1	1	435.501	868.988	2	868.502	0.4858	0	30.31	27	33	0.096	K	VIPELNGK	L
15	gi|329744642	glyceraldehyde-3-phosphate dehydrogenase [Sus scrofa]	271	28	2	149672	2	1	1	385.565	1153.67	3	1154.67	-0.9924	1	15.17	22	34	4.6	K	VVKQASEGPLK	G
15	gi|329744642	glyceraldehyde-3-phosphate dehydrogenase [Sus scrofa]	271	28	2	165952	1	1	1	613.32	1224.63	2	1223.72	0.9025	1	15.26	26	34	4.2	K	AVGKVIPELNGK	L	0.42
17	gi|350592969	PREDICTED: phosphoglycerate mutase 1-like [Sus scrofa]	215	6	1	148117	1	1	1	576.035	1150.06	2	1149.66	0.3942	0	60.67	28	33	9.7e-05	R	VLIAAHGNSLR	G	0.12
19	gi|350590321	PREDICTED: keratin, type I cytoskeletal 14-like isoform 1 [Sus scrofa]	190	5	4	79445	3	1	0	374.295	746.575	2	747.37	-0.7951	1	13.09	26	36	12	K	MAEKNR	K
19	gi|350590321	PREDICTED: keratin, type I cytoskeletal 14-like isoform 1 [Sus scrofa]	190	5	4	89216	1	0	0	404.51	807.006	2	806.392	0.6136	0	52.11		34	0.00091	R	LAADDFR	T
19	gi|350590321	PREDICTED: keratin, type I cytoskeletal 14-like isoform 1 [Sus scrofa]	190	5	4	130295	1	0	0	355.76	1064.26	3	1063.6	0.655	1	34.37	34	35	0.062	R	LASYLDKVR	A
19	gi|350590321	PREDICTED: keratin, type I cytoskeletal 14-like isoform 1 [Sus scrofa]	190	5	4	130737	1	0	0	355.923	1064.75	3	1063.6	1.1455	1	35.65	31	35	0.046	R	LASYLDKVR	A
19	gi|350590321	PREDICTED: keratin, type I cytoskeletal 14-like isoform 1 [Sus scrofa]	190	5	4	144812	4	1	1	565.257	1128.5	2	1128.56	-0.0611	1	15.01	31	35	5.6	R	TKVMDVHDGK	V
19	gi|350590321	PREDICTED: keratin, type I cytoskeletal 14-like isoform 1 [Sus scrofa]	190	5	4	145204	5	1	1	565.5	1128.99	2	1128.56	0.4265	1	13.91	29	34	6.2	R	TKVMDVHDGK	V
19	gi|350590321	PREDICTED: keratin, type I cytoskeletal 14-like isoform 1 [Sus scrofa]	190	5	4	145221	3	1	1	565.536	1129.06	2	1128.56	0.4969	1	17.74	27	33	2.1	R	TKVMDVHDGK	V
19	gi|350590321	PREDICTED: keratin, type I cytoskeletal 14-like isoform 1 [Sus scrofa]	190	5	4	145245	3	1	1	565.591	1129.17	2	1128.56	0.6075	1	14.29	28	34	5	R	TKVMDVHDGK	V
19	gi|350590321	PREDICTED: keratin, type I cytoskeletal 14-like isoform 1 [Sus scrofa]	190	5	4	145263	1	1	1	565.645	1129.28	2	1128.56	0.7159	1	18.31	30	35	2.5	R	TKVMDVHDGK	V
19	gi|350590321	PREDICTED: keratin, type I cytoskeletal 14-like isoform 1 [Sus scrofa]	190	5	4	145277	3	1	1	565.721	1129.43	2	1128.56	0.8667	1	15.21	29	35	5.1	R	TKVMDVHDGK	V
19	gi|350590321	PREDICTED: keratin, type I cytoskeletal 14-like isoform 1 [Sus scrofa]	190	5	4	145281	1	1	1	565.742	1129.47	2	1128.56	0.9095	1	15.73	24	35	4.5	R	TKVMDVHDGK	V
19	gi|350590321	PREDICTED: keratin, type I cytoskeletal 14-like isoform 1 [Sus scrofa]	190	5	4	147399	1	1	0	573.093	1144.17	2	1143.49	0.6844	0	30.55	30	34	0.12	K	DAEDWFFSK	T
19	gi|350590321	PREDICTED: keratin, type I cytoskeletal 14-like isoform 1 [Sus scrofa]	190	5	4	201056	1	1	0	690.594	1379.17	2	1378.72	0.4536	1	62.86	28	33	5.3e-05	K	TRLEQEIATYR	R
19	gi|350590321	PREDICTED: keratin, type I cytoskeletal 14-like isoform 1 [Sus scrofa]	190	5	4	213212	1	1	1	478.982	1433.93	3	1432.72	1.2096	1	15.99	23	34	3.5	K	ASLENSLEETKGR	Y
19	gi|350590321	PREDICTED: keratin, type I cytoskeletal 14-like isoform 1 [Sus scrofa]	190	5	4	341985	1	1	1	770.562	2308.66	3	2308.06	0.6062	0	75.35	28	31	1.9e-06	R	LLEGEDAHLSSSQFSSGSQSSR	D
19	gi|350590321	PREDICTED: keratin, type I cytoskeletal 14-like isoform 1 [Sus scrofa]	190	5	4	341990	1	1	1	770.595	2308.76	3	2308.06	0.7055	0	75.49	21	31	2.1e-06	R	LLEGEDAHLSSSQFSSGSQSSR	D	0.36
20	gi|211578396	uncharacterized protein LOC100156145 [Sus scrofa]	187	2	1	338544	1	1	1	1135.59	2269.16	2	2269.09	0.0718	0	103.04	28	32	4.3e-09	K	DVALSSGSACTSASLEPSYVLR	A
20	gi|211578396	uncharacterized protein LOC100156145 [Sus scrofa]	187	2	1	338670	1	1	1	1135.93	2269.84	2	2269.09	0.7478	0	111.86	28	32	5.3e-10	K	DVALSSGSACTSASLEPSYVLR	A	0.06
21	gi|47523278	resistin precursor [Sus scrofa]	178	5	2	194891	1	1	1	679.245	1356.48	2	1356.78	-0.3011	0	27.71	22	34	0.25	R	DVASFLIPQVIR	N
21	gi|47523278	resistin precursor [Sus scrofa]	178	5	2	195393	1	1	1	679.528	1357.04	2	1356.78	0.2649	0	60.21	26	34	0.00013	R	DVASFLIPQVIR	N
21	gi|47523278	resistin precursor [Sus scrofa]	178	5	2	195400	1	1	1	679.537	1357.06	2	1356.78	0.2819	0	60.73	27	34	0.00011	R	DVASFLIPQVIR	N
21	gi|47523278	resistin precursor [Sus scrofa]	178	5	2	195490	1	1	1	679.777	1357.54	2	1356.78	0.7625	0	63.5	32	34	6.8e-05	R	DVASFLIPQVIR	N
21	gi|47523278	resistin precursor [Sus scrofa]	178	5	2	200105	1	1	1	688.037	1374.06	2	1373.65	0.4098	0	51.48	29	34	0.00094	K	SLCPVDEAINEK	I
21	gi|47523278	resistin precursor [Sus scrofa]	178	5	2	200117	1	1	1	688.066	1374.12	2	1373.65	0.4676	0	54.45	32	33	0.00041	K	SLCPVDEAINEK	I
21	gi|47523278	resistin precursor [Sus scrofa]	178	5	2	203432	1	1	1	696.58	1391.15	2	1390.7	0.4468	1	14.31	21	33	3.9	R	NIGLECRSVTSR	G
21	gi|47523278	resistin precursor [Sus scrofa]	178	5	2	288997	1	1	1	614.57	1840.69	3	1840.12	0.5662	0	13.85	23	33	4.5	K	ALSLLFLPTLGLLVWGK	S	0.63
22	gi|194037336	PREDICTED: keratin, type II cytoskeletal 1b [Sus scrofa]	169	7	2	123404	1	1	1	512.229	1022.44	2	1022.47	-0.0299	1	14.88	24	35	5.4	K	GSSKSGGGGSSR	V
22	gi|194037336	PREDICTED: keratin, type II cytoskeletal 1b [Sus scrofa]	169	7	2	123407	1	1	1	512.238	1022.46	2	1022.47	-0.0127	1	21.54	24	35	1.2	K	GSSKSGGGGSSR	V
22	gi|194037336	PREDICTED: keratin, type II cytoskeletal 1b [Sus scrofa]	169	7	2	123408	1	1	1	512.243	1022.47	2	1022.47	-0.0027	1	19.36	28	35	1.9	K	GSSKSGGGGSSR	V
22	gi|194037336	PREDICTED: keratin, type II cytoskeletal 1b [Sus scrofa]	169	7	2	123426	3	1	1	512.302	1022.59	2	1022.47	0.1143	1	13.45	28	35	7.4	K	GSSKSGGGGSSR	V
22	gi|194037336	PREDICTED: keratin, type II cytoskeletal 1b [Sus scrofa]	169	7	2	123547	1	1	1	512.587	1023.16	2	1022.47	0.6857	1	13.78	23	34	6.1	K	GSSKSGGGGSSR	V
22	gi|194037336	PREDICTED: keratin, type II cytoskeletal 1b [Sus scrofa]	169	7	2	133550	1	0	0	541.226	1080.44	2	1081.59	-1.154	1	28.04	34	34	0.24	K	FASFIDKVR	F
22	gi|194037336	PREDICTED: keratin, type II cytoskeletal 1b [Sus scrofa]	169	7	2	133898	1	0	0	541.49	1080.96	2	1081.59	-0.6274	1	28.34	25	33	0.17	K	FASFIDKVR	F
22	gi|194037336	PREDICTED: keratin, type II cytoskeletal 1b [Sus scrofa]	169	7	2	150800	1	1	1	387.208	1158.6	3	1158.52	0.0783	1	14.93	24	35	5.6	K	KDVDASYMSK	V
22	gi|194037336	PREDICTED: keratin, type II cytoskeletal 1b [Sus scrofa]	169	7	2	150953	2	1	1	387.457	1159.35	3	1158.52	0.825	1	15.06	28	35	5.4	K	KDVDASYMSK	V
22	gi|194037336	PREDICTED: keratin, type II cytoskeletal 1b [Sus scrofa]	169	7	2	154522	1	1	1	590.491	1178.97	2	1177.61	1.3577	0	38.73		34	0.019	K	YQELQITAGR	H
22	gi|194037336	PREDICTED: keratin, type II cytoskeletal 1b [Sus scrofa]	169	7	2	178106	1	1	1	640.486	1278.96	2	1278.68	0.2763	0	14.26	24	34	5.6	K	LSLDVEIATYR	K
22	gi|194037336	PREDICTED: keratin, type II cytoskeletal 1b [Sus scrofa]	169	7	2	178117	2	1	1	640.511	1279.01	2	1278.68	0.3247	0	15.76	27	34	3.7	K	LSLDVEIATYR	K
22	gi|194037336	PREDICTED: keratin, type II cytoskeletal 1b [Sus scrofa]	169	7	2	203118	1	1	1	464.162	1389.46	3	1388.66	0.8027	0	14.47	24	34	5.1	K	LQDMEDALQQAK	E
22	gi|194037336	PREDICTED: keratin, type II cytoskeletal 1b [Sus scrofa]	169	7	2	203144	1	1	1	464.226	1389.66	3	1388.66	0.9962	0	25.21	27	34	0.43	K	LQDMEDALQQAK	E
22	gi|194037336	PREDICTED: keratin, type II cytoskeletal 1b [Sus scrofa]	169	7	2	204576	1	1	1	698.945	1395.88	2	1394.64	1.2334	0	15.2	22	34	4.2	R	VYSVGSPAGSGDGSR	A
22	gi|194037336	PREDICTED: keratin, type II cytoskeletal 1b [Sus scrofa]	169	7	2	204613	1	1	1	699.008	1396	2	1394.64	1.3578	0	16.5	27	34	3	R	VYSVGSPAGSGDGSR	A
22	gi|194037336	PREDICTED: keratin, type II cytoskeletal 1b [Sus scrofa]	169	7	2	221159	2	0	0	738.025	1474.04	2	1474.78	-0.7429	0	51.84		34	0.00086	R	FLEQQNQVLQTK	W
22	gi|194037336	PREDICTED: keratin, type II cytoskeletal 1b [Sus scrofa]	169	7	2	221175	1	0	0	738.059	1474.1	2	1474.78	-0.6741	0	39.87	26	33	0.012	R	FLEQQNQVLQTK	W
22	gi|194037336	PREDICTED: keratin, type II cytoskeletal 1b [Sus scrofa]	169	7	2	221384	1	0	0	738.544	1475.07	2	1474.78	0.2957	0	52.17		34	0.00078	R	FLEQQNQVLQTK	W
22	gi|194037336	PREDICTED: keratin, type II cytoskeletal 1b [Sus scrofa]	169	7	2	221388	1	0	0	738.556	1475.1	2	1474.78	0.3189	0	25.36	27	33	0.36	R	FLEQQNQVLQTK	W
22	gi|194037336	PREDICTED: keratin, type II cytoskeletal 1b [Sus scrofa]	169	7	2	221393	2	0	0	738.563	1475.11	2	1474.78	0.3339	0	60.14		33	0.00012	R	FLEQQNQVLQTK	W
22	gi|194037336	PREDICTED: keratin, type II cytoskeletal 1b [Sus scrofa]	169	7	2	221396	1	0	0	738.568	1475.12	2	1474.78	0.3435	0	49.19		33	0.0014	R	FLEQQNQVLQTK	W
22	gi|194037336	PREDICTED: keratin, type II cytoskeletal 1b [Sus scrofa]	169	7	2	221423	1	0	0	738.607	1475.2	2	1474.78	0.4221	0	20.24	29	32	0.93	R	FLEQQNQVLQTK	W
22	gi|194037336	PREDICTED: keratin, type II cytoskeletal 1b [Sus scrofa]	169	7	2	221429	1	0	0	738.626	1475.24	2	1474.78	0.4593	0	68.68		32	1.3e-05	R	FLEQQNQVLQTK	W
22	gi|194037336	PREDICTED: keratin, type II cytoskeletal 1b [Sus scrofa]	169	7	2	221477	1	0	0	738.769	1475.52	2	1474.78	0.7463	0	24.38	27	34	0.5	R	FLEQQNQVLQTK	W	0.16
23	gi|350584000	PREDICTED: keratin, type II cytoskeletal 78-like [Sus scrofa]	162	6	1	221429	1	0	0	738.626	1475.24	2	1474.78	0.4593	0	68.68		32	1.3e-05	R	FLEQQNQVLQTK	W
24	gi|311251336	PREDICTED: elongation factor Tu, mitochondrial-like [Sus scrofa]	145	2	2	82351	1	1	1	257.136	768.386	3	767.49	0.8951	0	13.31	19	34	6.4	R	IILPQGK	E
24	gi|311251336	PREDICTED: elongation factor Tu, mitochondrial-like [Sus scrofa]	145	2	2	90009	5	1	1	408	813.986	2	814.455	-0.469	0	17.46	31	34	2.6	K	ILAEGGGAK	F
24	gi|311251336	PREDICTED: elongation factor Tu, mitochondrial-like [Sus scrofa]	145	2	2	90010	1	1	1	408.004	813.993	2	814.455	-0.462	0	16.63	27	34	3.2	K	ILAEGGGAK	F
24	gi|311251336	PREDICTED: elongation factor Tu, mitochondrial-like [Sus scrofa]	145	2	2	96772	4	1	1	431.812	861.609	2	861.474	0.1351	0	17.31	32	36	4	-	MAAATLLR	A
24	gi|311251336	PREDICTED: elongation factor Tu, mitochondrial-like [Sus scrofa]	145	2	2	276337	1	1	1	590.462	1768.36	3	1769.76	-1.3938	0	20.04	22	32	0.79	R	HYAHTDCPGHADYVK	N
24	gi|311251336	PREDICTED: elongation factor Tu, mitochondrial-like [Sus scrofa]	145	2	2	276338	1	1	1	590.463	1768.37	3	1769.76	-1.3911	0	32.16	19	32	0.049	R	HYAHTDCPGHADYVK	N
24	gi|311251336	PREDICTED: elongation factor Tu, mitochondrial-like [Sus scrofa]	145	2	2	276339	1	1	1	590.463	1768.37	3	1769.76	-1.3896	0	18.5	15	32	1.1	R	HYAHTDCPGHADYVK	N
24	gi|311251336	PREDICTED: elongation factor Tu, mitochondrial-like [Sus scrofa]	145	2	2	276343	1	1	1	590.473	1768.4	3	1769.76	-1.3614	0	26.18	23	32	0.2	R	HYAHTDCPGHADYVK	N
24	gi|311251336	PREDICTED: elongation factor Tu, mitochondrial-like [Sus scrofa]	145	2	2	276353	1	1	1	590.492	1768.45	3	1769.76	-1.305	0	15.49	19	32	2.5	R	HYAHTDCPGHADYVK	N
24	gi|311251336	PREDICTED: elongation factor Tu, mitochondrial-like [Sus scrofa]	145	2	2	276357	1	1	1	590.503	1768.49	3	1769.76	-1.2711	0	27.76	22	32	0.16	R	HYAHTDCPGHADYVK	N
24	gi|311251336	PREDICTED: elongation factor Tu, mitochondrial-like [Sus scrofa]	145	2	2	276363	1	1	1	590.514	1768.52	3	1769.76	-1.2393	0	26.59	26	33	0.22	R	HYAHTDCPGHADYVK	N
24	gi|311251336	PREDICTED: elongation factor Tu, mitochondrial-like [Sus scrofa]	145	2	2	276369	1	1	1	590.54	1768.6	3	1769.76	-1.1589	0	22.77	23	33	0.6	R	HYAHTDCPGHADYVK	N
24	gi|311251336	PREDICTED: elongation factor Tu, mitochondrial-like [Sus scrofa]	145	2	2	276371	1	1	1	590.542	1768.6	3	1769.76	-1.1535	0	29.01	25	33	0.14	R	HYAHTDCPGHADYVK	N
24	gi|311251336	PREDICTED: elongation factor Tu, mitochondrial-like [Sus scrofa]	145	2	2	276373	1	1	1	590.552	1768.63	3	1769.76	-1.1253	0	14.44	27	33	4.1	R	HYAHTDCPGHADYVK	N
24	gi|311251336	PREDICTED: elongation factor Tu, mitochondrial-like [Sus scrofa]	145	2	2	276375	1	1	1	590.559	1768.66	3	1769.76	-1.1028	0	25.69		33	0.31	R	HYAHTDCPGHADYVK	N
24	gi|311251336	PREDICTED: elongation factor Tu, mitochondrial-like [Sus scrofa]	145	2	2	276377	1	1	1	590.562	1768.66	3	1769.76	-1.0935	0	27.05	22	33	0.23	R	HYAHTDCPGHADYVK	N
24	gi|311251336	PREDICTED: elongation factor Tu, mitochondrial-like [Sus scrofa]	145	2	2	276384	1	1	1	590.581	1768.72	3	1769.76	-1.038	0	22.16	20	33	0.7	R	HYAHTDCPGHADYVK	N
24	gi|311251336	PREDICTED: elongation factor Tu, mitochondrial-like [Sus scrofa]	145	2	2	276397	1	1	1	590.61	1768.81	3	1769.76	-0.951	0	23.66		33	0.5	R	HYAHTDCPGHADYVK	N
24	gi|311251336	PREDICTED: elongation factor Tu, mitochondrial-like [Sus scrofa]	145	2	2	276398	1	1	1	590.61	1768.81	3	1769.76	-0.9489	0	27.97	25	33	0.18	R	HYAHTDCPGHADYVK	N
24	gi|311251336	PREDICTED: elongation factor Tu, mitochondrial-like [Sus scrofa]	145	2	2	276401	1	1	1	590.625	1768.85	3	1769.76	-0.9042	0	22.96	28	33	0.58	R	HYAHTDCPGHADYVK	N
24	gi|311251336	PREDICTED: elongation factor Tu, mitochondrial-like [Sus scrofa]	145	2	2	276403	1	1	1	590.631	1768.87	3	1769.76	-0.8862	0	17.64	21	33	2	R	HYAHTDCPGHADYVK	N
24	gi|311251336	PREDICTED: elongation factor Tu, mitochondrial-like [Sus scrofa]	145	2	2	276405	1	1	1	590.632	1768.87	3	1769.76	-0.8847	0	21.77	16	33	0.77	R	HYAHTDCPGHADYVK	N
24	gi|311251336	PREDICTED: elongation factor Tu, mitochondrial-like [Sus scrofa]	145	2	2	276406	1	1	1	590.632	1768.87	3	1769.76	-0.8832	0	18.66	20	33	1.6	R	HYAHTDCPGHADYVK	N
24	gi|311251336	PREDICTED: elongation factor Tu, mitochondrial-like [Sus scrofa]	145	2	2	276407	1	1	1	590.634	1768.88	3	1769.76	-0.8787	0	20.84	17	33	0.95	R	HYAHTDCPGHADYVK	N
24	gi|311251336	PREDICTED: elongation factor Tu, mitochondrial-like [Sus scrofa]	145	2	2	276416	1	1	1	590.642	1768.9	3	1769.76	-0.8544	0	21.47	19	33	0.82	R	HYAHTDCPGHADYVK	N
24	gi|311251336	PREDICTED: elongation factor Tu, mitochondrial-like [Sus scrofa]	145	2	2	276419	1	1	1	590.648	1768.92	3	1769.76	-0.8373	0	21.56	24	33	0.81	R	HYAHTDCPGHADYVK	N
24	gi|311251336	PREDICTED: elongation factor Tu, mitochondrial-like [Sus scrofa]	145	2	2	276421	1	1	1	590.65	1768.93	3	1769.76	-0.8289	0	22.78	32	33	0.61	R	HYAHTDCPGHADYVK	N
24	gi|311251336	PREDICTED: elongation factor Tu, mitochondrial-like [Sus scrofa]	145	2	2	276431	1	1	1	590.696	1769.07	3	1769.76	-0.6912	0	20.23	20	33	1.1	R	HYAHTDCPGHADYVK	N
24	gi|311251336	PREDICTED: elongation factor Tu, mitochondrial-like [Sus scrofa]	145	2	2	276433	1	1	1	590.697	1769.07	3	1769.76	-0.6876	0	19.63	25	33	1.3	R	HYAHTDCPGHADYVK	N
24	gi|311251336	PREDICTED: elongation factor Tu, mitochondrial-like [Sus scrofa]	145	2	2	276446	1	1	1	590.73	1769.17	3	1769.76	-0.5907	0	29.23	25	33	0.14	R	HYAHTDCPGHADYVK	N
24	gi|311251336	PREDICTED: elongation factor Tu, mitochondrial-like [Sus scrofa]	145	2	2	276457	1	1	1	590.756	1769.25	3	1769.76	-0.5121	0	24.95	20	33	0.33	R	HYAHTDCPGHADYVK	N
24	gi|311251336	PREDICTED: elongation factor Tu, mitochondrial-like [Sus scrofa]	145	2	2	276459	1	1	1	590.763	1769.27	3	1769.76	-0.4923	0	23.38	17	32	0.45	R	HYAHTDCPGHADYVK	N
24	gi|311251336	PREDICTED: elongation factor Tu, mitochondrial-like [Sus scrofa]	145	2	2	276462	1	1	1	590.778	1769.31	3	1769.76	-0.4464	0	17.63	19	32	1.6	R	HYAHTDCPGHADYVK	N
24	gi|311251336	PREDICTED: elongation factor Tu, mitochondrial-like [Sus scrofa]	145	2	2	276463	1	1	1	590.781	1769.32	3	1769.76	-0.4374	0	22.39	21	32	0.51	R	HYAHTDCPGHADYVK	N
24	gi|311251336	PREDICTED: elongation factor Tu, mitochondrial-like [Sus scrofa]	145	2	2	276466	1	1	1	590.798	1769.37	3	1769.76	-0.3849	0	21.96		32	0.54	R	HYAHTDCPGHADYVK	N
24	gi|311251336	PREDICTED: elongation factor Tu, mitochondrial-like [Sus scrofa]	145	2	2	276473	1	1	1	590.873	1769.6	3	1769.76	-0.1602	0	17.83	19	33	1.9	R	HYAHTDCPGHADYVK	N
24	gi|311251336	PREDICTED: elongation factor Tu, mitochondrial-like [Sus scrofa]	145	2	2	276476	1	1	1	590.877	1769.61	3	1769.76	-0.15	0	18.22	22	33	1.8	R	HYAHTDCPGHADYVK	N
24	gi|311251336	PREDICTED: elongation factor Tu, mitochondrial-like [Sus scrofa]	145	2	2	276477	1	1	1	590.88	1769.62	3	1769.76	-0.1398	0	20.86	25	33	0.97	R	HYAHTDCPGHADYVK	N
24	gi|311251336	PREDICTED: elongation factor Tu, mitochondrial-like [Sus scrofa]	145	2	2	276488	1	1	1	590.914	1769.72	3	1769.76	-0.0372	0	13.99	26	33	4.8	R	HYAHTDCPGHADYVK	N
24	gi|311251336	PREDICTED: elongation factor Tu, mitochondrial-like [Sus scrofa]	145	2	2	276492	1	1	1	590.938	1769.79	3	1769.76	0.0351	0	14.82	27	33	3.9	R	HYAHTDCPGHADYVK	N
24	gi|311251336	PREDICTED: elongation factor Tu, mitochondrial-like [Sus scrofa]	145	2	2	276493	1	1	1	590.942	1769.8	3	1769.76	0.0447	0	25.93	27	33	0.3	R	HYAHTDCPGHADYVK	N
24	gi|311251336	PREDICTED: elongation factor Tu, mitochondrial-like [Sus scrofa]	145	2	2	276502	1	1	1	590.981	1769.92	3	1769.76	0.1632	0	25.08	22	33	0.37	R	HYAHTDCPGHADYVK	N
24	gi|311251336	PREDICTED: elongation factor Tu, mitochondrial-like [Sus scrofa]	145	2	2	276517	1	1	1	591.02	1770.04	3	1769.76	0.2817	0	17.41	18	33	2.2	R	HYAHTDCPGHADYVK	N
24	gi|311251336	PREDICTED: elongation factor Tu, mitochondrial-like [Sus scrofa]	145	2	2	276519	1	1	1	591.025	1770.05	3	1769.76	0.2952	0	23.21	32	33	0.57	R	HYAHTDCPGHADYVK	N
24	gi|311251336	PREDICTED: elongation factor Tu, mitochondrial-like [Sus scrofa]	145	2	2	276537	1	1	1	591.065	1770.17	3	1769.76	0.4146	0	26.91	25	33	0.24	R	HYAHTDCPGHADYVK	N
24	gi|311251336	PREDICTED: elongation factor Tu, mitochondrial-like [Sus scrofa]	145	2	2	276555	1	1	1	591.097	1770.27	3	1769.76	0.5106	0	17.73	22	33	1.8	R	HYAHTDCPGHADYVK	N
24	gi|311251336	PREDICTED: elongation factor Tu, mitochondrial-like [Sus scrofa]	145	2	2	276585	1	1	1	591.167	1770.48	3	1769.76	0.7218	0	17.46	26	32	1.8	R	HYAHTDCPGHADYVK	N
24	gi|311251336	PREDICTED: elongation factor Tu, mitochondrial-like [Sus scrofa]	145	2	2	276589	1	1	1	591.185	1770.53	3	1769.76	0.7755	0	13.02	26	33	5.5	R	HYAHTDCPGHADYVK	N
24	gi|311251336	PREDICTED: elongation factor Tu, mitochondrial-like [Sus scrofa]	145	2	2	276596	1	1	1	591.2	1770.58	3	1769.76	0.8196	0	25.25	17	33	0.35	R	HYAHTDCPGHADYVK	N
24	gi|311251336	PREDICTED: elongation factor Tu, mitochondrial-like [Sus scrofa]	145	2	2	276604	1	1	1	591.216	1770.63	3	1769.76	0.8691	0	16.02	20	33	3	R	HYAHTDCPGHADYVK	N
24	gi|311251336	PREDICTED: elongation factor Tu, mitochondrial-like [Sus scrofa]	145	2	2	283706	1	1	1	905.514	1809.01	2	1808.93	0.0862	0	25.48	20	33	0.32	R	DKPHVNVGTIGHVDHGK	T
24	gi|311251336	PREDICTED: elongation factor Tu, mitochondrial-like [Sus scrofa]	145	2	2	283731	1	1	1	905.596	1809.18	2	1808.93	0.2484	0	36.08	20	33	0.027	R	DKPHVNVGTIGHVDHGK	T
24	gi|311251336	PREDICTED: elongation factor Tu, mitochondrial-like [Sus scrofa]	145	2	2	283736	1	1	1	905.607	1809.2	2	1808.93	0.272	0	28.46	19	33	0.15	R	DKPHVNVGTIGHVDHGK	T
24	gi|311251336	PREDICTED: elongation factor Tu, mitochondrial-like [Sus scrofa]	145	2	2	283787	1	1	1	604.272	1809.79	3	1808.93	0.8648	0	31.16	22	33	0.084	R	DKPHVNVGTIGHVDHGK	T
24	gi|311251336	PREDICTED: elongation factor Tu, mitochondrial-like [Sus scrofa]	145	2	2	283791	1	1	1	604.28	1809.82	3	1808.93	0.8909	0	19.64	22	33	1.2	R	DKPHVNVGTIGHVDHGK	T
24	gi|311251336	PREDICTED: elongation factor Tu, mitochondrial-like [Sus scrofa]	145	2	2	283800	1	1	1	604.313	1809.92	3	1808.93	0.9893	0	22.07	21	33	0.68	R	DKPHVNVGTIGHVDHGK	T
24	gi|311251336	PREDICTED: elongation factor Tu, mitochondrial-like [Sus scrofa]	145	2	2	283857	1	1	1	604.418	1810.23	3	1808.93	1.304	0	20.94	22	33	0.82	R	DKPHVNVGTIGHVDHGK	T	0.21
26	gi|311267693	PREDICTED: eosinophil peroxidase [Sus scrofa]	113	4	2	111613	1	1	1	482.609	963.204	2	963.46	-0.256	0	32.42	28	35	0.1	R	FCGLSQPR	N
26	gi|311267693	PREDICTED: eosinophil peroxidase [Sus scrofa]	113	4	2	111653	1	1	1	964.85	963.842	1	963.46	0.3826	0	25.69	22	35	0.46	R	FCGLSQPR	N
26	gi|311267693	PREDICTED: eosinophil peroxidase [Sus scrofa]	113	4	2	142611	1	1	1	561.128	1120.24	2	1119.56	0.6799	1	18.81	29	35	2.2	R	RFCGLSQPR	N
26	gi|311267693	PREDICTED: eosinophil peroxidase [Sus scrofa]	113	4	2	147896	2	1	1	575.246	1148.48	2	1148.56	-0.0876	0	18.14	30	35	2.5	R	IPCFLAGDTR	V
26	gi|311267693	PREDICTED: eosinophil peroxidase [Sus scrofa]	113	4	2	170584	1	1	1	623.639	1245.26	2	1245.68	-0.4159	0	43.22	28	34	0.0066	R	VGPLLACLFEK	Q
26	gi|311267693	PREDICTED: eosinophil peroxidase [Sus scrofa]	113	4	2	170588	1	1	1	623.655	1245.3	2	1245.68	-0.3827	0	43.5		34	0.0066	R	VGPLLACLFEK	Q
26	gi|311267693	PREDICTED: eosinophil peroxidase [Sus scrofa]	113	4	2	170687	1	1	1	624.062	1246.11	2	1245.68	0.4293	0	45.04	31	33	0.0035	R	VGPLLACLFEK	Q
26	gi|311267693	PREDICTED: eosinophil peroxidase [Sus scrofa]	113	4	2	187289	1	1	1	660.075	1318.13	2	1317.74	0.3946	0	21.35	19	33	0.8	R	IVHEGGIDPILR	G
26	gi|311267693	PREDICTED: eosinophil peroxidase [Sus scrofa]	113	4	2	187295	1	1	1	660.107	1318.2	2	1317.74	0.459	0	22.58	14	33	0.6	R	IVHEGGIDPILR	G
26	gi|311267693	PREDICTED: eosinophil peroxidase [Sus scrofa]	113	4	2	187296	1	1	1	440.412	1318.21	3	1317.74	0.4728	0	28.91	30	33	0.14	R	IVHEGGIDPILR	G
26	gi|311267693	PREDICTED: eosinophil peroxidase [Sus scrofa]	113	4	2	187331	1	1	1	440.507	1318.5	3	1317.74	0.7584	0	18.22	28	34	2.3	R	IVHEGGIDPILR	G
26	gi|311267693	PREDICTED: eosinophil peroxidase [Sus scrofa]	113	4	2	214989	1	1	1	723.163	1444.31	2	1444.73	-0.4228	0	57.94	28	33	0.00018	R	IVCDNTGITTVPR	D
26	gi|311267693	PREDICTED: eosinophil peroxidase [Sus scrofa]	113	4	2	227224	1	1	0	502.946	1505.82	3	1506.86	-1.0442	1	14.31	20	34	4.9	R	KIVGAMVQIITYR	D
26	gi|311267693	PREDICTED: eosinophil peroxidase [Sus scrofa]	113	4	2	227262	1	1	0	503.048	1506.12	3	1506.86	-0.7379	1	14.85	20	33	3.9	R	KIVGAMVQIITYR	D
26	gi|311267693	PREDICTED: eosinophil peroxidase [Sus scrofa]	113	4	2	227278	1	1	0	503.083	1506.23	3	1506.86	-0.6314	1	14.75	22	32	3.2	R	KIVGAMVQIITYR	D	0.22
29	gi|335281875	PREDICTED: proteoglycan 3-like [Sus scrofa]	104	4	2	60060	1	1	1	613.34	612.333	1	611.293	1.04	0	23.46	24	34	0.59	R	GGHWR	R
29	gi|335281875	PREDICTED: proteoglycan 3-like [Sus scrofa]	104	4	2	115394	1	1	1	991.36	990.353	1	990.532	-0.1794	1	18.63	25	35	2.6	R	RLPFVCSI	-
29	gi|335281875	PREDICTED: proteoglycan 3-like [Sus scrofa]	104	4	2	115407	1	1	1	991.412	990.405	1	990.532	-0.127	1	18.05	22	35	3	R	RLPFVCSI	-
29	gi|335281875	PREDICTED: proteoglycan 3-like [Sus scrofa]	104	4	2	115461	1	1	1	496.52	991.025	2	990.532	0.4926	1	34.39	23	34	0.046	R	RLPFVCSI	-
29	gi|335281875	PREDICTED: proteoglycan 3-like [Sus scrofa]	104	4	2	156064	1	1	1	593.708	1185.4	2	1185.63	-0.224	0	49.58	26	35	0.0018	R	GNLISIHNYR	T
29	gi|335281875	PREDICTED: proteoglycan 3-like [Sus scrofa]	104	4	2	156066	1	1	1	593.714	1185.41	2	1185.63	-0.2122	0	46.73	31	35	0.0035	R	GNLISIHNYR	T
29	gi|335281875	PREDICTED: proteoglycan 3-like [Sus scrofa]	104	4	2	156107	1	1	1	593.985	1185.96	2	1185.63	0.3308	0	54.12	31	34	0.00059	R	GNLISIHNYR	T
29	gi|335281875	PREDICTED: proteoglycan 3-like [Sus scrofa]	104	4	2	156126	1	1	1	396.379	1186.11	3	1185.63	0.4888	0	17.83	24	33	1.9	R	GNLISIHNYR	T
29	gi|335281875	PREDICTED: proteoglycan 3-like [Sus scrofa]	104	4	2	156140	1	1	1	396.406	1186.2	3	1185.63	0.5719	0	27.58	25	34	0.23	R	GNLISIHNYR	T
29	gi|335281875	PREDICTED: proteoglycan 3-like [Sus scrofa]	104	4	2	156147	1	1	1	396.42	1186.24	3	1185.63	0.6139	0	18.14	27	34	2.3	R	GNLISIHNYR	T
29	gi|335281875	PREDICTED: proteoglycan 3-like [Sus scrofa]	104	4	2	156148	1	1	1	396.422	1186.24	3	1185.63	0.6175	0	17.76	27	34	2.5	R	GNLISIHNYR	T
29	gi|335281875	PREDICTED: proteoglycan 3-like [Sus scrofa]	104	4	2	167197	9	1	0	616.872	1231.73	2	1232.53	-0.7981	0	14.46	30	35	6.1	R	QDLEGSGDQER	E
29	gi|335281875	PREDICTED: proteoglycan 3-like [Sus scrofa]	104	4	2	167240	5	1	0	617.021	1232.03	2	1232.53	-0.5003	0	15.61	31	34	3.8	R	QDLEGSGDQER	E
29	gi|335281875	PREDICTED: proteoglycan 3-like [Sus scrofa]	104	4	2	167247	3	1	0	617.045	1232.08	2	1232.53	-0.4509	0	15.63	29	33	3.3	R	QDLEGSGDQER	E	0.43
30	gi|311267256	PREDICTED: keratin, type I cuticular Ha2 [Sus scrofa]	103	2	2	84301	3	1	1	388.946	775.877	2	775.39	0.4868	0	17.88		35	2.6	R	VLEEMR	C
30	gi|311267256	PREDICTED: keratin, type I cuticular Ha2 [Sus scrofa]	103	2	2	84310	6	1	1	388.981	775.947	2	775.39	0.5576	0	18.01	35	35	2.6	R	VLEEMR	C
30	gi|311267256	PREDICTED: keratin, type I cuticular Ha2 [Sus scrofa]	103	2	2	89216	1	0	0	404.51	807.006	2	806.392	0.6136	0	52.11		34	0.00091	K	LAADDFR	T
30	gi|311267256	PREDICTED: keratin, type I cuticular Ha2 [Sus scrofa]	103	2	2	138690	1	0	0	553.092	1104.17	2	1103.59	0.5806	0	31.77	24	34	0.1	R	ILDELTLCK	A
30	gi|311267256	PREDICTED: keratin, type I cuticular Ha2 [Sus scrofa]	103	2	2	160766	1	1	1	602.253	1202.49	2	1202.62	-0.1267	1	14.3	24	35	6	K	ILCTRAENAR	T
30	gi|311267256	PREDICTED: keratin, type I cuticular Ha2 [Sus scrofa]	103	2	2	160933	1	1	1	602.699	1203.38	2	1202.62	0.7647	1	13.09	26	35	8	K	ILCTRAENAR	T
30	gi|311267256	PREDICTED: keratin, type I cuticular Ha2 [Sus scrofa]	103	2	2	198836	2	0	0	686.049	1370.08	2	1370.73	-0.6438	1	14.82	28	33	4	R	QLVEADTNGLRR	I
30	gi|311267256	PREDICTED: keratin, type I cuticular Ha2 [Sus scrofa]	103	2	2	199220	1	0	0	458.212	1371.61	3	1370.73	0.8867	1	21.73	22	34	1	R	QLVEADTNGLRR	I
30	gi|311267256	PREDICTED: keratin, type I cuticular Ha2 [Sus scrofa]	103	2	2	221916	1	1	0	739.718	1477.42	2	1477.69	-0.2686	0	78.38	31	34	1.9e-06	R	DSLENTLTETEAR	Y
30	gi|311267256	PREDICTED: keratin, type I cuticular Ha2 [Sus scrofa]	103	2	2	252317	1	1	1	545.711	1634.11	3	1634.86	-0.7507	0	14.65	21	33	4	R	LNIEVDAAPPVDLNR	V
30	gi|311267256	PREDICTED: keratin, type I cuticular Ha2 [Sus scrofa]	103	2	2	252480	1	1	1	546.221	1635.64	3	1634.86	0.7796	0	14.79	25	33	4	R	LNIEVDAAPPVDLNR	V	0.2
31	gi|349585237	keratin 31 [Sus scrofa]	103	2	2	89216	1	0	0	404.51	807.006	2	806.392	0.6136	0	52.11		34	0.00091	K	LAADDFR	T
31	gi|349585237	keratin 31 [Sus scrofa]	103	2	2	138690	1	0	0	553.092	1104.17	2	1103.59	0.5806	0	31.77	24	34	0.1	R	ILDELTLCK	A
31	gi|349585237	keratin 31 [Sus scrofa]	103	2	2	154292	2	1	0	589.416	1176.82	2	1176.59	0.2262	1	14.29	26	35	6.1	K	ILCSKSENAR	L
31	gi|349585237	keratin 31 [Sus scrofa]	103	2	2	154326	1	1	0	589.539	1177.06	2	1176.59	0.4724	1	14.48	25	33	4.2	K	ILCSKSENAR	L
31	gi|349585237	keratin 31 [Sus scrofa]	103	2	2	160443	3	1	0	601.49	1200.96	2	1201.62	-0.6542	0	15.07	29	34	4.7	K	ADLEAQVESLK	E
31	gi|349585237	keratin 31 [Sus scrofa]	103	2	2	161998	1	1	0	605.919	1209.82	2	1208.64	1.1828	1	13.46	23	34	6.4	R	TKYETELGLR	Q
31	gi|349585237	keratin 31 [Sus scrofa]	103	2	2	162005	1	1	0	605.935	1209.86	2	1208.64	1.216	1	15.13	27	34	4.4	R	TKYETELGLR	Q
31	gi|349585237	keratin 31 [Sus scrofa]	103	2	2	221916	1	0	0	739.718	1477.42	2	1477.69	-0.2686	0	78.38	31	34	1.9e-06	R	DSLENTLTETEAR	Y	0.22
32	gi|350590325	PREDICTED: LOW QUALITY PROTEIN: keratin, type I cuticular Ha4-like [Sus scrofa]	103	2	2	89216	1	0	0	404.51	807.006	2	806.392	0.6136	0	52.11		34	0.00091	K	LAADDFR	T
32	gi|350590325	PREDICTED: LOW QUALITY PROTEIN: keratin, type I cuticular Ha4-like [Sus scrofa]	103	2	2	138690	1	0	0	553.092	1104.17	2	1103.59	0.5806	0	31.77	24	34	0.1	R	ILDELTLCK	A
32	gi|350590325	PREDICTED: LOW QUALITY PROTEIN: keratin, type I cuticular Ha4-like [Sus scrofa]	103	2	2	165799	1	1	1	613.199	1224.38	2	1224.69	-0.3066	0	14.2	22	34	5.4	-	MLNAKPPPTIK	G
32	gi|350590325	PREDICTED: LOW QUALITY PROTEIN: keratin, type I cuticular Ha4-like [Sus scrofa]	103	2	2	173830	3	1	1	420.459	1258.36	3	1259.64	-1.2794	0	14.49	28	34	5.5	K	ADLETQVESLR	E
32	gi|350590325	PREDICTED: LOW QUALITY PROTEIN: keratin, type I cuticular Ha4-like [Sus scrofa]	103	2	2	173849	2	1	1	420.534	1258.58	3	1259.64	-1.055	0	15.25	29	34	4.6	K	ADLETQVESLR	E
32	gi|350590325	PREDICTED: LOW QUALITY PROTEIN: keratin, type I cuticular Ha4-like [Sus scrofa]	103	2	2	221916	1	0	0	739.718	1477.42	2	1477.69	-0.2686	0	78.38	31	34	1.9e-06	R	DSLENTLTETEAR	Y
32	gi|350590325	PREDICTED: LOW QUALITY PROTEIN: keratin, type I cuticular Ha4-like [Sus scrofa]	103	2	2	230631	4	1	1	762.198	1522.38	2	1522.89	-0.5088	1	13.32	30	33	5.4	-	MLNAKPPPTIKGIK	G	0.21
33	gi|47523546	myoglobin [Sus scrofa]	102	4	2	79474	1	1	1	748.466	747.458	1	747.428	0.0306	0	21.07	29	36	1.8	K	ALELFR	N
33	gi|47523546	myoglobin [Sus scrofa]	102	4	2	79475	1	1	1	374.751	747.488	2	747.428	0.0599	0	30.37		36	0.21	K	ALELFR	N
33	gi|47523546	myoglobin [Sus scrofa]	102	4	2	79477	2	1	1	748.52	747.512	1	747.428	0.0845	0	20.2	28	36	2.2	K	ALELFR	N
33	gi|47523546	myoglobin [Sus scrofa]	102	4	2	79490	1	1	1	374.911	747.808	2	747.428	0.3797	0	36.32		35	0.041	K	ALELFR	N
33	gi|47523546	myoglobin [Sus scrofa]	102	4	2	79492	1	1	1	374.914	747.813	2	747.428	0.3851	0	43.13		35	0.0081	K	ALELFR	N
33	gi|47523546	myoglobin [Sus scrofa]	102	4	2	79508	1	1	1	374.961	747.907	2	747.428	0.4793	0	23.57		34	0.64	K	ALELFR	N
33	gi|47523546	myoglobin [Sus scrofa]	102	4	2	86820	4	1	1	395.375	788.735	2	789.423	-0.688	1	17.27	34	36	4.6	K	ASEDLKK	H
33	gi|47523546	myoglobin [Sus scrofa]	102	4	2	107571	1	1	1	470.823	939.631	2	940.465	-0.8344	1	29.9	19	34	0.16	K	YKELGFQG	-
33	gi|47523546	myoglobin [Sus scrofa]	102	4	2	107607	1	1	1	470.912	939.81	2	940.465	-0.6558	1	24.48	18	34	0.54	K	YKELGFQG	-
33	gi|47523546	myoglobin [Sus scrofa]	102	4	2	107672	1	1	1	941.263	940.256	1	940.465	-0.2093	1	40.87	17	34	0.013	K	YKELGFQG	-
33	gi|47523546	myoglobin [Sus scrofa]	102	4	2	107678	1	1	1	941.292	940.285	1	940.465	-0.1803	1	45.28	17	34	0.0047	K	YKELGFQG	-	0.72
36	gi|311267290	PREDICTED: keratin-associated protein 3-1-like [Sus scrofa]	98	1	1	213063	1	1	1	717.504	1432.99	2	1432.69	0.3066	0	97.99	27	34	2.2e-08	R	VPTGPATTICSSDK	F	0.3
44	gi|350590319	PREDICTED: keratin, type I cytoskeletal 17-like [Sus scrofa]	90	3	3	56755	2	1	1	591.245	590.238	1	590.339	-0.101	0	18.33	32	37	3.8	M	TTTIR	Q
44	gi|350590319	PREDICTED: keratin, type I cytoskeletal 17-like [Sus scrofa]	90	3	3	56792	6	1	1	591.37	590.363	1	590.339	0.024	0	18.2	34	37	3.9	M	TTTIR	Q
44	gi|350590319	PREDICTED: keratin, type I cytoskeletal 17-like [Sus scrofa]	90	3	3	56795	6	1	1	591.372	590.365	1	590.339	0.0259	0	13.33	27	37	12	M	TTTIR	Q
44	gi|350590319	PREDICTED: keratin, type I cytoskeletal 17-like [Sus scrofa]	90	3	3	79445	3	0	0	374.295	746.575	2	747.37	-0.7951	1	13.09	26	36	12	K	MAEKNR	K
44	gi|350590319	PREDICTED: keratin, type I cytoskeletal 17-like [Sus scrofa]	90	3	3	89216	1	0	0	404.51	807.006	2	806.392	0.6136	0	52.11		34	0.00091	R	LAADDFR	T
44	gi|350590319	PREDICTED: keratin, type I cytoskeletal 17-like [Sus scrofa]	90	3	3	130295	1	0	0	355.76	1064.26	3	1063.6	0.655	1	34.37	34	35	0.062	R	LASYLDKVR	A
44	gi|350590319	PREDICTED: keratin, type I cytoskeletal 17-like [Sus scrofa]	90	3	3	130737	1	0	0	355.923	1064.75	3	1063.6	1.1455	1	35.65	31	35	0.046	R	LASYLDKVR	A
44	gi|350590319	PREDICTED: keratin, type I cytoskeletal 17-like [Sus scrofa]	90	3	3	147399	1	0	0	573.093	1144.17	2	1143.49	0.6844	0	30.55	30	34	0.12	K	DAEDWFFSK	T
44	gi|350590319	PREDICTED: keratin, type I cytoskeletal 17-like [Sus scrofa]	90	3	3	153561	1	1	1	586.872	1171.73	2	1171.62	0.1108	0	17.25	26	35	3.1	R	VSVEADINGLR	R
44	gi|350590319	PREDICTED: keratin, type I cytoskeletal 17-like [Sus scrofa]	90	3	3	201056	1	0	0	690.594	1379.17	2	1378.72	0.4536	1	62.86	28	33	5.3e-05	K	TRLEQEIATYR	R	0.29
45	gi|311267268	PREDICTED: keratin, type I cytoskeletal 15-like [Sus scrofa]	90	3	3	89216	1	0	0	404.51	807.006	2	806.392	0.6136	0	52.11		34	0.00091	R	LAADDFR	L
45	gi|311267268	PREDICTED: keratin, type I cytoskeletal 15-like [Sus scrofa]	90	3	3	94331	2	1	1	424.553	847.091	2	846.445	0.6466	0	13.87	27	36	8.6	K	TEITDLR	R
45	gi|311267268	PREDICTED: keratin, type I cytoskeletal 15-like [Sus scrofa]	90	3	3	99782	1	1	0	444.262	886.51	2	886.414	0.0952	0	13.89	21	36	8.7	K	QSPSSPER	D
45	gi|311267268	PREDICTED: keratin, type I cytoskeletal 15-like [Sus scrofa]	90	3	3	117214	2	1	1	502.02	1002.03	2	1002.55	-0.5203	1	20.68		34	1.1	K	TEITDLRR	T
45	gi|311267268	PREDICTED: keratin, type I cytoskeletal 15-like [Sus scrofa]	90	3	3	130295	1	0	0	355.76	1064.26	3	1063.6	0.655	1	34.37	34	35	0.062	R	LASYLDKVR	A
45	gi|311267268	PREDICTED: keratin, type I cytoskeletal 15-like [Sus scrofa]	90	3	3	130737	1	0	0	355.923	1064.75	3	1063.6	1.1455	1	35.65	31	35	0.046	R	LASYLDKVR	A
45	gi|311267268	PREDICTED: keratin, type I cytoskeletal 15-like [Sus scrofa]	90	3	3	133354	1	1	1	540.644	1079.27	2	1079.51	-0.2408	0	18.65	31	34	2.1	R	EQYEAIAEK	N
45	gi|311267268	PREDICTED: keratin, type I cytoskeletal 15-like [Sus scrofa]	90	3	3	134739	1	1	1	362.819	1085.44	3	1086.58	-1.1421	1	15.01	25	35	5.6	R	EASLGGGGGKVR	I
45	gi|311267268	PREDICTED: keratin, type I cytoskeletal 15-like [Sus scrofa]	90	3	3	134751	1	1	1	362.865	1085.57	3	1086.58	-1.0059	1	20.83	28	35	1.5	R	EASLGGGGGKVR	I
45	gi|311267268	PREDICTED: keratin, type I cytoskeletal 15-like [Sus scrofa]	90	3	3	134759	1	1	1	362.889	1085.64	3	1086.58	-0.9339	1	21.57	29	35	1.2	R	EASLGGGGGKVR	I
45	gi|311267268	PREDICTED: keratin, type I cytoskeletal 15-like [Sus scrofa]	90	3	3	134760	3	1	1	362.892	1085.65	3	1086.58	-0.9243	1	14.34	28	35	6.6	R	EASLGGGGGKVR	I
45	gi|311267268	PREDICTED: keratin, type I cytoskeletal 15-like [Sus scrofa]	90	3	3	134765	1	1	1	362.917	1085.73	3	1086.58	-0.849	1	18.85	27	35	2.3	R	EASLGGGGGKVR	I
45	gi|311267268	PREDICTED: keratin, type I cytoskeletal 15-like [Sus scrofa]	90	3	3	134767	1	1	1	362.924	1085.75	3	1086.58	-0.8277	1	22.46	33	35	1	R	EASLGGGGGKVR	I
45	gi|311267268	PREDICTED: keratin, type I cytoskeletal 15-like [Sus scrofa]	90	3	3	134943	1	1	1	363.222	1086.64	3	1086.58	0.0657	1	18.12	24	35	2.8	R	EASLGGGGGKVR	I
45	gi|311267268	PREDICTED: keratin, type I cytoskeletal 15-like [Sus scrofa]	90	3	3	153403	1	1	1	391.174	1170.5	3	1170.6	-0.1003	0	13.17	26	35	7.8	R	QGVEADINGLR	R
45	gi|311267268	PREDICTED: keratin, type I cytoskeletal 15-like [Sus scrofa]	90	3	3	201056	1	0	0	690.594	1379.17	2	1378.72	0.4536	1	62.86	28	33	5.3e-05	K	TRLEQEIATYR	S	0.21
48	gi|311255413	PREDICTED: keratin, type II cytoskeletal 79 [Sus scrofa]	86	5	2	102583	6	0	0	453.953	905.892	2	905.461	0.431	0	16.09	31	34	3.6	R	FLEQQNK	V
48	gi|311255413	PREDICTED: keratin, type II cytoskeletal 79 [Sus scrofa]	86	5	2	108548	6	1	0	473.486	944.958	2	944.504	0.4543	1	13.72		34	6	R	GRLDSELR	N
48	gi|311255413	PREDICTED: keratin, type II cytoskeletal 79 [Sus scrofa]	86	5	2	133550	1	0	0	541.226	1080.44	2	1081.59	-1.154	1	28.04	34	34	0.24	K	FASFIDKVR	F
48	gi|311255413	PREDICTED: keratin, type II cytoskeletal 79 [Sus scrofa]	86	5	2	133898	1	0	0	541.49	1080.96	2	1081.59	-0.6274	1	28.34	25	33	0.17	K	FASFIDKVR	F
48	gi|311255413	PREDICTED: keratin, type II cytoskeletal 79 [Sus scrofa]	86	5	2	143649	1	1	1	563.055	1124.09	2	1124.53	-0.4338	1	13.91	25	33	4.2	K	KDVDAAFMGR	M
48	gi|311255413	PREDICTED: keratin, type II cytoskeletal 79 [Sus scrofa]	86	5	2	143701	1	1	1	563.153	1124.29	2	1124.53	-0.2376	1	15.36	24	34	4.4	K	KDVDAAFMGR	M
48	gi|311255413	PREDICTED: keratin, type II cytoskeletal 79 [Sus scrofa]	86	5	2	144253	1	1	1	563.416	1124.82	2	1124.53	0.2892	1	14.43	26	34	5.5	K	KDVDAAFMGR	M
48	gi|311255413	PREDICTED: keratin, type II cytoskeletal 79 [Sus scrofa]	86	5	2	144275	3	1	1	563.438	1124.86	2	1124.53	0.332	1	14.77	30	34	5	K	KDVDAAFMGR	M
48	gi|311255413	PREDICTED: keratin, type II cytoskeletal 79 [Sus scrofa]	86	5	2	144302	2	1	1	563.484	1124.95	2	1124.53	0.4258	1	13.7	27	34	5.6	K	KDVDAAFMGR	M
48	gi|311255413	PREDICTED: keratin, type II cytoskeletal 79 [Sus scrofa]	86	5	2	144326	1	1	1	563.518	1125.02	2	1124.53	0.4922	1	20.11	29	33	1.1	K	KDVDAAFMGR	M
48	gi|311255413	PREDICTED: keratin, type II cytoskeletal 79 [Sus scrofa]	86	5	2	144334	1	1	1	563.534	1125.05	2	1124.53	0.5252	1	14.84	24	33	3.5	K	KDVDAAFMGR	M
48	gi|311255413	PREDICTED: keratin, type II cytoskeletal 79 [Sus scrofa]	86	5	2	144386	1	1	1	563.773	1125.53	2	1124.53	1.0028	1	13.52	25	34	7	K	KDVDAAFMGR	M
48	gi|311255413	PREDICTED: keratin, type II cytoskeletal 79 [Sus scrofa]	86	5	2	144412	3	1	1	563.904	1125.79	2	1124.53	1.2648	1	13.79	28	34	6.5	K	KDVDAAFMGR	M
48	gi|311255413	PREDICTED: keratin, type II cytoskeletal 79 [Sus scrofa]	86	5	2	165477	1	1	1	612.47	1222.92	2	1221.57	1.3587	0	16.72	25	34	3.2	R	MQLDSLQSER	G
48	gi|311255413	PREDICTED: keratin, type II cytoskeletal 79 [Sus scrofa]	86	5	2	172648	4	1	0	627.968	1253.92	2	1253.56	0.3622	0	14.51		34	5	R	NMQDLVEDFK	N
48	gi|311255413	PREDICTED: keratin, type II cytoskeletal 79 [Sus scrofa]	86	5	2	189480	1	1	0	665.945	1329.88	2	1328.72	1.1563	0	38.17	23	34	0.023	R	NLDLDSIIAEVK	A
48	gi|311255413	PREDICTED: keratin, type II cytoskeletal 79 [Sus scrofa]	86	5	2	208148	4	1	1	708.024	1414.03	2	1413.76	0.2765	1	14.89	30	34	4.4	R	TVQRLQGEVDAAK	K
48	gi|311255413	PREDICTED: keratin, type II cytoskeletal 79 [Sus scrofa]	86	5	2	208733	3	1	1	708.529	1415.04	2	1413.76	1.2855	1	13.02	29	34	6.9	R	TVQRLQGEVDAAK	K
48	gi|311255413	PREDICTED: keratin, type II cytoskeletal 79 [Sus scrofa]	86	5	2	221384	3	0	0	738.544	1475.07	2	1475.8	-0.7247	1	40.12		34	0.012	R	FLEQQNKVLETK	W
48	gi|311255413	PREDICTED: keratin, type II cytoskeletal 79 [Sus scrofa]	86	5	2	221393	3	0	0	738.563	1475.11	2	1475.8	-0.6865	1	45.61		33	0.0033	R	FLEQQNKVLETK	W
48	gi|311255413	PREDICTED: keratin, type II cytoskeletal 79 [Sus scrofa]	86	5	2	221396	3	0	0	738.568	1475.12	2	1475.8	-0.6769	1	42.37		33	0.0069	R	FLEQQNKVLETK	W
48	gi|311255413	PREDICTED: keratin, type II cytoskeletal 79 [Sus scrofa]	86	5	2	221429	4	0	0	738.626	1475.24	2	1475.8	-0.5611	1	41.24		32	0.0071	R	FLEQQNKVLETK	W
48	gi|311255413	PREDICTED: keratin, type II cytoskeletal 79 [Sus scrofa]	86	5	2	221754	1	0	0	739.417	1476.82	2	1475.8	1.0205	1	17.13	20	34	2.7	R	FLEQQNKVLETK	W	0.18
49	gi|350580091	PREDICTED: proteoglycan 3-like [Sus scrofa]	85	2	1	215548	1	1	1	725.066	1448.12	2	1447.76	0.3569	0	63.2	29	33	5.8e-05	R	INSFIQNAICLR	N	0.13
50	gi|311267276	PREDICTED: keratin, type I cytoskeletal 19-like [Sus scrofa]	84	2	2	89216	1	0	0	404.51	807.006	2	806.392	0.6136	0	52.11		34	0.00091	R	LAADDFR	T
50	gi|311267276	PREDICTED: keratin, type I cytoskeletal 19-like [Sus scrofa]	84	2	2	97018	1	1	1	432.6	863.186	2	864.459	-1.2736	0	17.48	21	35	3.5	K	EELAYLK	K
50	gi|311267276	PREDICTED: keratin, type I cytoskeletal 19-like [Sus scrofa]	84	2	2	201056	1	0	0	690.594	1379.17	2	1378.72	0.4536	1	62.86	28	33	5.3e-05	K	TRLEQEIATYR	N
50	gi|311267276	PREDICTED: keratin, type I cytoskeletal 19-like [Sus scrofa]	84	2	2	236161	1	1	1	516.579	1546.72	3	1545.72	0.9909	0	14.28	25	34	4.9	R	QNQEYQHLMDIK	T	0.16
51	gi|47523720	glucose-6-phosphate isomerase [Sus scrofa]	83	3	2	93725	6	1	1	423.019	844.024	2	844.452	-0.4276	1	18.51		35	2.5	K	SRGVEAAR	E
51	gi|47523720	glucose-6-phosphate isomerase [Sus scrofa]	83	3	2	93750	1	1	1	423.05	844.086	2	844.452	-0.3658	1	21.56	34	36	1.5	K	SRGVEAAR	E
51	gi|47523720	glucose-6-phosphate isomerase [Sus scrofa]	83	3	2	93772	4	1	1	423.082	844.148	2	844.452	-0.303	1	21.93	36	36	1.5	K	SRGVEAAR	E
51	gi|47523720	glucose-6-phosphate isomerase [Sus scrofa]	83	3	2	94119	2	1	1	423.437	844.86	2	844.452	0.4086	1	22		35	1.2	K	SRGVEAAR	E
51	gi|47523720	glucose-6-phosphate isomerase [Sus scrofa]	83	3	2	94131	2	1	1	423.473	844.931	2	844.452	0.4796	1	23.64		35	0.69	K	SRGVEAAR	E
51	gi|47523720	glucose-6-phosphate isomerase [Sus scrofa]	83	3	2	94132	3	1	1	423.474	844.933	2	844.452	0.4812	1	22.03		35	1	K	SRGVEAAR	E
51	gi|47523720	glucose-6-phosphate isomerase [Sus scrofa]	83	3	2	98810	1	1	1	439.459	876.904	2	877.55	-0.6459	0	34.81	21	34	0.046	R	AVLHVALR	N
51	gi|47523720	glucose-6-phosphate isomerase [Sus scrofa]	83	3	2	98881	1	1	1	439.922	877.829	2	877.55	0.2797	0	22.77	16	35	0.89	R	AVLHVALR	N
51	gi|47523720	glucose-6-phosphate isomerase [Sus scrofa]	83	3	2	98898	1	1	1	293.73	878.168	3	877.55	0.6184	0	29.89		35	0.19	R	AVLHVALR	N
51	gi|47523720	glucose-6-phosphate isomerase [Sus scrofa]	83	3	2	98899	1	1	1	293.736	878.187	3	877.55	0.6367	0	32.5	34	35	0.1	R	AVLHVALR	N
51	gi|47523720	glucose-6-phosphate isomerase [Sus scrofa]	83	3	2	214965	6	1	1	723.097	1444.18	2	1443.74	0.4397	1	13.57	31	33	4.6	K	DVMPEVNRVLEK	M
51	gi|47523720	glucose-6-phosphate isomerase [Sus scrofa]	83	3	2	263707	1	1	1	564.609	1690.81	3	1690.93	-0.1264	0	14.58	24	33	4	K	ILLANFLAQTEALMK	G
51	gi|47523720	glucose-6-phosphate isomerase [Sus scrofa]	83	3	2	263739	1	1	1	846.513	1691.01	2	1691.72	-0.7139	0	24.35	28	33	0.42	R	FAAYFQQGDMESNGK	Y
51	gi|47523720	glucose-6-phosphate isomerase [Sus scrofa]	83	3	2	263749	1	1	1	846.544	1691.07	2	1691.72	-0.6523	0	27.99	23	33	0.18	R	FAAYFQQGDMESNGK	Y
51	gi|47523720	glucose-6-phosphate isomerase [Sus scrofa]	83	3	2	263759	1	1	1	846.582	1691.15	2	1691.72	-0.5751	0	36.37	18	33	0.026	R	FAAYFQQGDMESNGK	Y
51	gi|47523720	glucose-6-phosphate isomerase [Sus scrofa]	83	3	2	263773	1	1	1	846.621	1691.23	2	1691.72	-0.4969	0	37.52	17	33	0.018	R	FAAYFQQGDMESNGK	Y	0.11
52	gi|335297670	PREDICTED: keratin, type I microfibrillar, 47.6 kDa-like [Sus scrofa]	83	1	1	221916	1	0	0	739.718	1477.42	2	1477.69	-0.2686	0	78.38	31	34	1.9e-06	R	DSLENTLTETEAR	Y	0.15
55	gi|311255411	PREDICTED: LOW QUALITY PROTEIN: keratin, type II cytoskeletal 4 [Sus scrofa]	75	5	2	94870	6	1	1	426.454	850.893	2	850.455	0.4386	0	14.21	29	33	4.4	R	SLYNLGGK	K
55	gi|311255411	PREDICTED: LOW QUALITY PROTEIN: keratin, type II cytoskeletal 4 [Sus scrofa]	75	5	2	102583	6	0	0	453.953	905.892	2	905.461	0.431	0	16.09	31	34	3.6	R	FLEQQNK	V
55	gi|311255411	PREDICTED: LOW QUALITY PROTEIN: keratin, type II cytoskeletal 4 [Sus scrofa]	75	5	2	112396	2	0	1	487.133	972.252	2	973.483	-1.231	0	27.65		36	0.35	K	NEISELNR	M
55	gi|311255411	PREDICTED: LOW QUALITY PROTEIN: keratin, type II cytoskeletal 4 [Sus scrofa]	75	5	2	112428	2	0	1	487.284	972.553	2	973.483	-0.9298	0	37.66		36	0.035	K	NEISELNR	M
55	gi|311255411	PREDICTED: LOW QUALITY PROTEIN: keratin, type II cytoskeletal 4 [Sus scrofa]	75	5	2	133550	1	0	0	541.226	1080.44	2	1081.59	-1.154	1	28.04	34	34	0.24	K	FASFIDKVR	F
55	gi|311255411	PREDICTED: LOW QUALITY PROTEIN: keratin, type II cytoskeletal 4 [Sus scrofa]	75	5	2	133898	1	0	0	541.49	1080.96	2	1081.59	-0.6274	1	28.34	25	33	0.17	K	FASFIDKVR	F
55	gi|311255411	PREDICTED: LOW QUALITY PROTEIN: keratin, type II cytoskeletal 4 [Sus scrofa]	75	5	2	148767	1	1	1	384.969	1151.89	3	1151.58	0.3036	1	22.82	27	34	0.81	R	GEAALKDAYSK	R
55	gi|311255411	PREDICTED: LOW QUALITY PROTEIN: keratin, type II cytoskeletal 4 [Sus scrofa]	75	5	2	149104	1	0	0	385.162	1152.47	3	1153.54	-1.0784	1	13.32	23	34	7.1	K	KDVDAAYMNK	V
55	gi|311255411	PREDICTED: LOW QUALITY PROTEIN: keratin, type II cytoskeletal 4 [Sus scrofa]	75	5	2	186913	2	1	1	439.495	1315.46	3	1316.67	-1.2049	1	20.88		34	1.2	K	NTKNEISELNR	M
55	gi|311255411	PREDICTED: LOW QUALITY PROTEIN: keratin, type II cytoskeletal 4 [Sus scrofa]	75	5	2	195426	4	1	0	679.582	1357.15	2	1357.71	-0.5584	0	14.68	30	33	3.7	R	DLDLDSIIAEVR	A
55	gi|311255411	PREDICTED: LOW QUALITY PROTEIN: keratin, type II cytoskeletal 4 [Sus scrofa]	75	5	2	195433	2	1	0	679.595	1357.17	2	1357.71	-0.534	0	16.86	31	33	2.2	R	DLDLDSIIAEVR	A
55	gi|311255411	PREDICTED: LOW QUALITY PROTEIN: keratin, type II cytoskeletal 4 [Sus scrofa]	75	5	2	209140	1	1	1	473.329	1416.97	3	1415.65	1.3163	0	13.6	22	34	6.4	M	TSVGVFQDMFNR	C
55	gi|311255411	PREDICTED: LOW QUALITY PROTEIN: keratin, type II cytoskeletal 4 [Sus scrofa]	75	5	2	221384	3	0	0	738.544	1475.07	2	1475.8	-0.7247	1	40.12		34	0.012	R	FLEQQNKVLETK	W
55	gi|311255411	PREDICTED: LOW QUALITY PROTEIN: keratin, type II cytoskeletal 4 [Sus scrofa]	75	5	2	221393	3	0	0	738.563	1475.11	2	1475.8	-0.6865	1	45.61		33	0.0033	R	FLEQQNKVLETK	W
55	gi|311255411	PREDICTED: LOW QUALITY PROTEIN: keratin, type II cytoskeletal 4 [Sus scrofa]	75	5	2	221396	3	0	0	738.568	1475.12	2	1475.8	-0.6769	1	42.37		33	0.0069	R	FLEQQNKVLETK	W
55	gi|311255411	PREDICTED: LOW QUALITY PROTEIN: keratin, type II cytoskeletal 4 [Sus scrofa]	75	5	2	221429	4	0	0	738.626	1475.24	2	1475.8	-0.5611	1	41.24		32	0.0071	R	FLEQQNKVLETK	W
55	gi|311255411	PREDICTED: LOW QUALITY PROTEIN: keratin, type II cytoskeletal 4 [Sus scrofa]	75	5	2	221754	1	0	0	739.417	1476.82	2	1475.8	1.0205	1	17.13	20	34	2.7	R	FLEQQNKVLETK	W
55	gi|311255411	PREDICTED: LOW QUALITY PROTEIN: keratin, type II cytoskeletal 4 [Sus scrofa]	75	5	2	250640	1	1	0	543.041	1626.1	3	1626.91	-0.8084	1	13.26	23	33	5.8	K	VLETKWNLLQQQK	T	0.16
65	gi|311267326	PREDICTED: keratin, type I cytoskeletal 20-like [Sus scrofa]	63	1	1	201056	1	0	0	690.594	1379.17	2	1378.72	0.4536	1	62.86	28	33	5.3e-05	K	TRLEQEIATYR	R
66	gi|311255405	PREDICTED: keratin, type II cytoskeletal 5 [Sus scrofa]	62	2	2	102583	6	0	0	453.953	905.892	2	905.461	0.431	0	16.09	31	34	3.6	R	FLEQQNK	V
66	gi|311255405	PREDICTED: keratin, type II cytoskeletal 5 [Sus scrofa]	62	2	2	104092	6	1	1	458.963	915.911	2	915.503	0.4083	1	13.51	32	35	7.4	R	AEIDNVKK	Q
66	gi|311255405	PREDICTED: keratin, type II cytoskeletal 5 [Sus scrofa]	62	2	2	108548	6	0	0	473.486	944.958	2	944.504	0.4543	1	13.72		34	6	R	GRLDSELR	N
66	gi|311255405	PREDICTED: keratin, type II cytoskeletal 5 [Sus scrofa]	62	2	2	133550	1	0	0	541.226	1080.44	2	1081.59	-1.154	1	28.04	34	34	0.24	K	FASFIDKVR	F
66	gi|311255405	PREDICTED: keratin, type II cytoskeletal 5 [Sus scrofa]	62	2	2	133898	1	0	0	541.49	1080.96	2	1081.59	-0.6274	1	28.34	25	33	0.17	K	FASFIDKVR	F
66	gi|311255405	PREDICTED: keratin, type II cytoskeletal 5 [Sus scrofa]	62	2	2	134753	2	0	0	362.867	1085.58	3	1086.6	-1.0238	1	14.82	29	35	5.9	R	EQIKTLNNK	F
66	gi|311255405	PREDICTED: keratin, type II cytoskeletal 5 [Sus scrofa]	62	2	2	145130	1	0	0	565.421	1128.83	2	1128.6	0.2256	0	13.4	24	35	8.1	K	LAELEDALQK	A
66	gi|311255405	PREDICTED: keratin, type II cytoskeletal 5 [Sus scrofa]	62	2	2	149104	1	0	0	385.162	1152.47	3	1153.54	-1.0784	1	13.32	23	34	7.1	K	KDVDAAYMNK	V
66	gi|311255405	PREDICTED: keratin, type II cytoskeletal 5 [Sus scrofa]	62	2	2	160912	1	1	1	602.623	1203.23	2	1202.63	0.6027	0	19.05	31	34	1.8	K	WTLLQEQGTK	T
66	gi|311255405	PREDICTED: keratin, type II cytoskeletal 5 [Sus scrofa]	62	2	2	160937	1	1	1	602.71	1203.41	2	1202.63	0.7759	0	32.36	28	35	0.095	K	WTLLQEQGTK	T
66	gi|311255405	PREDICTED: keratin, type II cytoskeletal 5 [Sus scrofa]	62	2	2	172648	4	0	0	627.968	1253.92	2	1253.56	0.3622	0	14.51		34	5	R	NMQDLVEDFK	N
66	gi|311255405	PREDICTED: keratin, type II cytoskeletal 5 [Sus scrofa]	62	2	2	189480	1	0	0	665.945	1329.88	2	1328.72	1.1563	0	38.17	23	34	0.023	R	NLDLDSIIAEVK	A
66	gi|311255405	PREDICTED: keratin, type II cytoskeletal 5 [Sus scrofa]	62	2	2	198812	1	1	0	686.012	1370.01	2	1370.74	-0.7314	1	14.41	24	34	5	R	NKLAELEDALQK	A
66	gi|311255405	PREDICTED: keratin, type II cytoskeletal 5 [Sus scrofa]	62	2	2	199101	3	1	0	686.556	1371.1	2	1370.74	0.3566	1	13.62	27	33	5.3	R	NKLAELEDALQK	A
66	gi|311255405	PREDICTED: keratin, type II cytoskeletal 5 [Sus scrofa]	62	2	2	199191	1	1	0	686.736	1371.46	2	1370.74	0.7176	1	45.3	33	34	0.0044	R	NKLAELEDALQK	A	0.22
71	gi|350583965	PREDICTED: keratin, type II cytoskeletal 6A-like [Sus scrofa]	58	2	2	44188	1	1	0	502.346	501.339	1	502.286	-0.9473	0	15.79	25	39	11	R	VTAGR	H
71	gi|350583965	PREDICTED: keratin, type II cytoskeletal 6A-like [Sus scrofa]	58	2	2	102583	6	0	0	453.953	905.892	2	905.461	0.431	0	16.09	31	34	3.6	R	FLEQQNK	V
71	gi|350583965	PREDICTED: keratin, type II cytoskeletal 6A-like [Sus scrofa]	58	2	2	108548	6	0	0	473.486	944.958	2	944.504	0.4543	1	13.72		34	6	R	GRLDSELR	S
71	gi|350583965	PREDICTED: keratin, type II cytoskeletal 6A-like [Sus scrofa]	58	2	2	133550	1	0	0	541.226	1080.44	2	1081.59	-1.154	1	28.04	34	34	0.24	K	FASFIDKVR	F
71	gi|350583965	PREDICTED: keratin, type II cytoskeletal 6A-like [Sus scrofa]	58	2	2	133898	1	0	0	541.49	1080.96	2	1081.59	-0.6274	1	28.34	25	33	0.17	K	FASFIDKVR	F
71	gi|350583965	PREDICTED: keratin, type II cytoskeletal 6A-like [Sus scrofa]	58	2	2	134753	2	0	0	362.867	1085.58	3	1086.6	-1.0238	1	14.82	29	35	5.9	R	EQIKTLNNK	F
71	gi|350583965	PREDICTED: keratin, type II cytoskeletal 6A-like [Sus scrofa]	58	2	2	145130	1	0	0	565.421	1128.83	2	1128.6	0.2256	0	13.4	24	35	8.1	K	LAELEDALQK	A
71	gi|350583965	PREDICTED: keratin, type II cytoskeletal 6A-like [Sus scrofa]	58	2	2	189480	1	0	0	665.945	1329.88	2	1328.72	1.1563	0	38.17	23	34	0.023	R	NLDLDSIIAEVK	A
71	gi|350583965	PREDICTED: keratin, type II cytoskeletal 6A-like [Sus scrofa]	58	2	2	198812	1	0	0	686.012	1370.01	2	1370.74	-0.7314	1	14.41	24	34	5	R	NKLAELEDALQK	A
71	gi|350583965	PREDICTED: keratin, type II cytoskeletal 6A-like [Sus scrofa]	58	2	2	199101	3	0	0	686.556	1371.1	2	1370.74	0.3566	1	13.62	27	33	5.3	R	NKLAELEDALQK	A
71	gi|350583965	PREDICTED: keratin, type II cytoskeletal 6A-like [Sus scrofa]	58	2	2	199191	1	0	0	686.736	1371.46	2	1370.74	0.7176	1	45.3	33	34	0.0044	R	NKLAELEDALQK	A	0.16
101	gi|311261653	PREDICTED: protein KIAA0284-like [Sus scrofa]	45	4	2	45922	1	1	0	257.047	512.08	2	512.307	-0.227	0	15.29	21	33	3	R	APGLR	D
101	gi|311261653	PREDICTED: protein KIAA0284-like [Sus scrofa]	45	4	2	47974	3	1	1	529.351	528.343	1	528.266	0.0776	0	16.54	30	36	4.8	R	GEPAR	R
101	gi|311261653	PREDICTED: protein KIAA0284-like [Sus scrofa]	45	4	2	61649	1	1	1	624.222	623.215	1	622.369	0.846	0	13.09	15	34	6.8	K	YVTLK	L
101	gi|311261653	PREDICTED: protein KIAA0284-like [Sus scrofa]	45	4	2	65509	7	1	1	322.991	643.967	2	645.345	-1.3773	0	14.31	31	37	9.9	R	GSAGVQK	V
101	gi|311261653	PREDICTED: protein KIAA0284-like [Sus scrofa]	45	4	2	80591	2	0	1	378.708	755.401	2	756.449	-1.0481	0	35.04		35	0.052	K	DVAILAR	E
101	gi|311261653	PREDICTED: protein KIAA0284-like [Sus scrofa]	45	4	2	80613	2	0	1	378.962	755.909	2	756.449	-0.5407	0	34.95		33	0.039	K	DVAILAR	E
101	gi|311261653	PREDICTED: protein KIAA0284-like [Sus scrofa]	45	4	2	80614	3	0	1	378.963	755.911	2	756.449	-0.5379	0	33.06		33	0.06	K	DVAILAR	E
101	gi|311261653	PREDICTED: protein KIAA0284-like [Sus scrofa]	45	4	2	80616	5	0	1	378.991	755.967	2	756.449	-0.4825	0	25.11		34	0.39	K	DVAILAR	E
101	gi|311261653	PREDICTED: protein KIAA0284-like [Sus scrofa]	45	4	2	88909	1	1	0	269.152	804.434	3	805.456	-1.0223	1	15.67	28	36	6.1	K	FSLRQR	R
101	gi|311261653	PREDICTED: protein KIAA0284-like [Sus scrofa]	45	4	2	109216	2	1	1	475.234	948.454	2	947.519	0.9354	0	15.53	29	35	5.4	K	ILFQNTGR	A
101	gi|311261653	PREDICTED: protein KIAA0284-like [Sus scrofa]	45	4	2	132228	5	1	1	1073.28	1072.27	1	1072.48	-0.2038	0	13.29	28	35	8.9	R	DEPSDGVAQR	M
101	gi|311261653	PREDICTED: protein KIAA0284-like [Sus scrofa]	45	4	2	132235	3	1	1	1073.35	1072.34	1	1072.48	-0.1408	0	14.42	28	35	6.8	R	DEPSDGVAQR	M
101	gi|311261653	PREDICTED: protein KIAA0284-like [Sus scrofa]	45	4	2	132247	3	1	1	537.219	1072.42	2	1072.48	-0.0551	0	16.15	30	35	4.6	R	DEPSDGVAQR	M
101	gi|311261653	PREDICTED: protein KIAA0284-like [Sus scrofa]	45	4	2	132341	1	1	1	537.412	1072.81	2	1072.48	0.3303	0	24.12	34	35	0.73	R	DEPSDGVAQR	M
101	gi|311261653	PREDICTED: protein KIAA0284-like [Sus scrofa]	45	4	2	132345	7	1	1	537.417	1072.82	2	1072.48	0.3411	0	14.25	29	35	7.1	R	DEPSDGVAQR	M
101	gi|311261653	PREDICTED: protein KIAA0284-like [Sus scrofa]	45	4	2	132350	6	1	1	537.431	1072.85	2	1072.48	0.3687	0	16.13		35	4.6	R	DEPSDGVAQR	M
101	gi|311261653	PREDICTED: protein KIAA0284-like [Sus scrofa]	45	4	2	132355	3	1	1	537.439	1072.86	2	1072.48	0.3857	0	21.4		35	1.3	R	DEPSDGVAQR	M
101	gi|311261653	PREDICTED: protein KIAA0284-like [Sus scrofa]	45	4	2	132358	2	1	1	537.443	1072.87	2	1072.48	0.3927	0	16.91	31	35	3.8	R	DEPSDGVAQR	M
101	gi|311261653	PREDICTED: protein KIAA0284-like [Sus scrofa]	45	4	2	132372	4	1	1	537.462	1072.91	2	1072.48	0.4307	0	14.84	34	35	5.8	R	DEPSDGVAQR	M
101	gi|311261653	PREDICTED: protein KIAA0284-like [Sus scrofa]	45	4	2	132386	9	1	1	537.504	1072.99	2	1072.48	0.5153	0	14.47	30	34	5	R	DEPSDGVAQR	M
101	gi|311261653	PREDICTED: protein KIAA0284-like [Sus scrofa]	45	4	2	132387	3	1	1	537.507	1073	2	1072.48	0.5213	0	16.19	30	34	3.3	R	DEPSDGVAQR	M
101	gi|311261653	PREDICTED: protein KIAA0284-like [Sus scrofa]	45	4	2	132388	3	1	1	537.512	1073.01	2	1072.48	0.5303	0	15.99	33	34	3.4	R	DEPSDGVAQR	M
101	gi|311261653	PREDICTED: protein KIAA0284-like [Sus scrofa]	45	4	2	132394	3	1	1	537.535	1073.05	2	1072.48	0.5763	0	16.35	31	34	2.9	R	DEPSDGVAQR	M
101	gi|311261653	PREDICTED: protein KIAA0284-like [Sus scrofa]	45	4	2	146195	2	0	1	568.648	1135.28	2	1135.46	-0.1741	0	14.31	28	35	6.2	R	DLDQNMNDR	C
101	gi|311261653	PREDICTED: protein KIAA0284-like [Sus scrofa]	45	4	2	156067	2	1	1	1186.43	1185.42	1	1186.69	-1.2704	1	16.69	30	35	3.5	K	EISSILKELR	R
101	gi|311261653	PREDICTED: protein KIAA0284-like [Sus scrofa]	45	4	2	156133	1	1	1	594.092	1186.17	2	1186.69	-0.5222	1	42.54		33	0.0069	K	EISSILKELR	R
101	gi|311261653	PREDICTED: protein KIAA0284-like [Sus scrofa]	45	4	2	156138	1	1	1	594.104	1186.19	2	1186.69	-0.4978	1	32.26		34	0.078	K	EISSILKELR	R
101	gi|311261653	PREDICTED: protein KIAA0284-like [Sus scrofa]	45	4	2	156196	1	1	1	594.229	1186.44	2	1186.69	-0.249	1	21.33	29	35	1.2	K	EISSILKELR	R
101	gi|311261653	PREDICTED: protein KIAA0284-like [Sus scrofa]	45	4	2	156202	2	1	1	594.245	1186.47	2	1186.69	-0.2176	1	19.32	29	35	1.9	K	EISSILKELR	R
101	gi|311261653	PREDICTED: protein KIAA0284-like [Sus scrofa]	45	4	2	156294	1	1	1	594.375	1186.74	2	1186.69	0.0442	1	13.15	22	35	8	K	EISSILKELR	R
101	gi|311261653	PREDICTED: protein KIAA0284-like [Sus scrofa]	45	4	2	156365	1	1	1	594.438	1186.86	2	1186.69	0.1692	1	18.29	26	35	2.4	K	EISSILKELR	R
101	gi|311261653	PREDICTED: protein KIAA0284-like [Sus scrofa]	45	4	2	156435	1	1	1	594.501	1186.99	2	1186.69	0.2946	1	19.15	29	34	1.8	K	EISSILKELR	R
101	gi|311261653	PREDICTED: protein KIAA0284-like [Sus scrofa]	45	4	2	156436	1	1	1	594.502	1186.99	2	1186.69	0.2966	1	13.45	22	34	6.6	K	EISSILKELR	R
101	gi|311261653	PREDICTED: protein KIAA0284-like [Sus scrofa]	45	4	2	156516	2	1	1	594.62	1187.23	2	1186.69	0.5342	1	13.1	26	34	7.1	K	EISSILKELR	R
101	gi|311261653	PREDICTED: protein KIAA0284-like [Sus scrofa]	45	4	2	179404	1	1	1	428.421	1282.24	3	1282.66	-0.4212	1	16.79	24	33	2.3	R	KAAVAPGEGEAAGR	A	0.04
104	gi|194037700	PREDICTED: centrosomal protein of 290 kDa-like [Sus scrofa]	44	2	2	56582	1	1	1	587.248	586.24	1	586.344	-0.1033	0	16.14	28	37	6.8	K	IEGIR	N
104	gi|194037700	PREDICTED: centrosomal protein of 290 kDa-like [Sus scrofa]	44	2	2	56591	1	1	1	587.277	586.27	1	586.344	-0.0739	0	16.12	28	37	6.8	K	IEGIR	N
104	gi|194037700	PREDICTED: centrosomal protein of 290 kDa-like [Sus scrofa]	44	2	2	56608	1	1	1	587.319	586.312	1	586.344	-0.0323	0	18.38	30	37	4	K	IEGIR	N
104	gi|194037700	PREDICTED: centrosomal protein of 290 kDa-like [Sus scrofa]	44	2	2	56615	2	1	1	587.334	586.326	1	586.344	-0.0174	0	16.11	30	37	6.8	K	IEGIR	N
104	gi|194037700	PREDICTED: centrosomal protein of 290 kDa-like [Sus scrofa]	44	2	2	56616	1	1	1	587.335	586.328	1	586.344	-0.0161	0	18.77	30	37	3.7	K	IEGIR	N
104	gi|194037700	PREDICTED: centrosomal protein of 290 kDa-like [Sus scrofa]	44	2	2	56622	5	1	1	587.357	586.349	1	586.344	0.0055	0	15.95	31	37	7.1	K	IEGIR	N
104	gi|194037700	PREDICTED: centrosomal protein of 290 kDa-like [Sus scrofa]	44	2	2	56632	5	1	1	294.216	586.416	2	586.344	0.0726	0	15.1	29	37	8.6	K	IEGIR	N
104	gi|194037700	PREDICTED: centrosomal protein of 290 kDa-like [Sus scrofa]	44	2	2	56634	8	1	1	294.234	586.453	2	586.344	0.1094	0	13.47	27	37	12	K	IEGIR	N
104	gi|194037700	PREDICTED: centrosomal protein of 290 kDa-like [Sus scrofa]	44	2	2	56637	6	1	1	294.302	586.589	2	586.344	0.2448	0	14.54	28	37	9.8	K	IEGIR	N
104	gi|194037700	PREDICTED: centrosomal protein of 290 kDa-like [Sus scrofa]	44	2	2	56638	7	1	1	294.312	586.609	2	586.344	0.2648	0	13.68	27	37	12	K	IEGIR	N
104	gi|194037700	PREDICTED: centrosomal protein of 290 kDa-like [Sus scrofa]	44	2	2	56642	6	1	1	294.332	586.65	2	586.344	0.3062	0	14.79	28	37	9.2	K	IEGIR	N
104	gi|194037700	PREDICTED: centrosomal protein of 290 kDa-like [Sus scrofa]	44	2	2	56643	6	1	1	294.362	586.709	2	586.344	0.3654	0	15.37	28	37	7.7	K	IEGIR	N
104	gi|194037700	PREDICTED: centrosomal protein of 290 kDa-like [Sus scrofa]	44	2	2	56645	3	1	1	294.365	586.715	2	586.344	0.3716	0	14.49	26	37	9.4	K	IEGIR	N
104	gi|194037700	PREDICTED: centrosomal protein of 290 kDa-like [Sus scrofa]	44	2	2	56646	5	1	1	294.376	586.738	2	586.344	0.3944	0	13.03	26	37	13	K	IEGIR	N
104	gi|194037700	PREDICTED: centrosomal protein of 290 kDa-like [Sus scrofa]	44	2	2	58290	1	1	0	601.3	600.292	1	600.312	-0.0194	0	14.12	26	37	10	K	EVEPK	S
104	gi|194037700	PREDICTED: centrosomal protein of 290 kDa-like [Sus scrofa]	44	2	2	79121	2	0	1	373.154	744.294	2	743.404	0.8898	1	13.15	27	37	13	R	LEGRNR	A
104	gi|194037700	PREDICTED: centrosomal protein of 290 kDa-like [Sus scrofa]	44	2	2	79244	3	0	1	373.248	744.482	2	743.404	1.0778	1	14.03	28	37	10	R	LEGRNR	A
104	gi|194037700	PREDICTED: centrosomal protein of 290 kDa-like [Sus scrofa]	44	2	2	87321	2	1	1	397.827	793.639	2	792.38	1.2589	0	13.1	25	35	8.8	R	APTTTMR	N
104	gi|194037700	PREDICTED: centrosomal protein of 290 kDa-like [Sus scrofa]	44	2	2	91292	1	1	1	274.836	821.486	3	822.373	-0.8869	0	14.71	27	35	6	K	MEQMLR	D
104	gi|194037700	PREDICTED: centrosomal protein of 290 kDa-like [Sus scrofa]	44	2	2	92840	2	1	1	418.075	834.135	2	833.395	0.74	0	17.04	30	35	3.9	K	QLEEGMK	E
104	gi|194037700	PREDICTED: centrosomal protein of 290 kDa-like [Sus scrofa]	44	2	2	98562	1	1	1	438.344	874.674	2	873.419	1.2553	0	17.89	29	36	3.5	K	NAQLDADK	S
104	gi|194037700	PREDICTED: centrosomal protein of 290 kDa-like [Sus scrofa]	44	2	2	102574	5	1	1	453.74	905.465	2	905.461	0.0044	0	17.53	31	35	3.4	R	QLDIFDR	Q
104	gi|194037700	PREDICTED: centrosomal protein of 290 kDa-like [Sus scrofa]	44	2	2	102583	5	0	1	453.953	905.892	2	905.461	0.431	0	17.43	31	34	2.6	R	QLDIFDR	Q
104	gi|194037700	PREDICTED: centrosomal protein of 290 kDa-like [Sus scrofa]	44	2	2	103067	2	1	1	455.392	908.769	2	909.386	-0.6171	0	15.85	29	35	4.2	K	NMSEAQSK	N
104	gi|194037700	PREDICTED: centrosomal protein of 290 kDa-like [Sus scrofa]	44	2	2	104334	2	1	1	307.008	918.002	3	918.459	-0.4577	1	13.99	26	34	5.4	R	QMAQEKGK	R
104	gi|194037700	PREDICTED: centrosomal protein of 290 kDa-like [Sus scrofa]	44	2	2	105491	4	1	1	464.771	927.527	2	927.539	-0.0118	0	16.83	33	35	3.7	R	AENQILLK	E
104	gi|194037700	PREDICTED: centrosomal protein of 290 kDa-like [Sus scrofa]	44	2	2	105497	5	1	1	464.831	927.648	2	927.539	0.109	0	17.7	34	35	3	R	AENQILLK	E
104	gi|194037700	PREDICTED: centrosomal protein of 290 kDa-like [Sus scrofa]	44	2	2	105502	4	1	1	464.88	927.745	2	927.539	0.206	0	17.66	31	35	3	R	AENQILLK	E
104	gi|194037700	PREDICTED: centrosomal protein of 290 kDa-like [Sus scrofa]	44	2	2	105521	10	0	1	465.035	928.056	2	927.539	0.5174	0	17.44		34	2.4	R	AENQILLK	E
104	gi|194037700	PREDICTED: centrosomal protein of 290 kDa-like [Sus scrofa]	44	2	2	105522	8	1	1	465.036	928.056	2	927.539	0.5176	0	16.45	32	34	3.1	R	AENQILLK	E
104	gi|194037700	PREDICTED: centrosomal protein of 290 kDa-like [Sus scrofa]	44	2	2	105527	4	1	1	465.049	928.084	2	927.539	0.5454	0	18.64	34	34	2	R	AENQILLK	E
104	gi|194037700	PREDICTED: centrosomal protein of 290 kDa-like [Sus scrofa]	44	2	2	105528	7	0	1	465.05	928.085	2	927.539	0.546	0	15.57	30	34	4.1	R	AENQILLK	E
104	gi|194037700	PREDICTED: centrosomal protein of 290 kDa-like [Sus scrofa]	44	2	2	105529	8	1	1	465.054	928.093	2	927.539	0.5542	0	17.48		34	2.8	R	AENQILLK	E
104	gi|194037700	PREDICTED: centrosomal protein of 290 kDa-like [Sus scrofa]	44	2	2	107831	5	1	1	315.091	942.25	3	941.529	0.7209	0	16.7	31	35	3.8	K	VNEQLALR	N
104	gi|194037700	PREDICTED: centrosomal protein of 290 kDa-like [Sus scrofa]	44	2	2	110633	6	1	1	478.707	955.398	2	955.414	-0.0159	0	15.59		35	4.7	K	EMCEFLK	K
104	gi|194037700	PREDICTED: centrosomal protein of 290 kDa-like [Sus scrofa]	44	2	2	110683	10	1	1	478.912	955.809	2	955.414	0.3943	0	13.23		35	8	K	EMCEFLK	K
104	gi|194037700	PREDICTED: centrosomal protein of 290 kDa-like [Sus scrofa]	44	2	2	116769	1	1	1	333.838	998.491	3	998.526	-0.0346	1	14.18	26	35	6.5	R	FKEMAVFK	I
104	gi|194037700	PREDICTED: centrosomal protein of 290 kDa-like [Sus scrofa]	44	2	2	116882	1	1	1	334.055	999.142	3	998.526	0.6164	1	19.51	25	35	1.8	R	FKEMAVFK	I
104	gi|194037700	PREDICTED: centrosomal protein of 290 kDa-like [Sus scrofa]	44	2	2	116887	1	1	1	334.066	999.177	3	998.526	0.6512	1	13.73	26	35	7.4	R	FKEMAVFK	I
104	gi|194037700	PREDICTED: centrosomal protein of 290 kDa-like [Sus scrofa]	44	2	2	116902	1	1	1	334.088	999.243	3	998.526	0.7172	1	13.74	25	35	7.8	R	FKEMAVFK	I
104	gi|194037700	PREDICTED: centrosomal protein of 290 kDa-like [Sus scrofa]	44	2	2	116908	1	1	1	334.104	999.29	3	998.526	0.7646	1	13.62	24	35	8	R	FKEMAVFK	I
104	gi|194037700	PREDICTED: centrosomal protein of 290 kDa-like [Sus scrofa]	44	2	2	116944	1	1	1	334.187	999.54	3	998.526	1.0139	1	19.7	28	35	2	R	FKEMAVFK	I
104	gi|194037700	PREDICTED: centrosomal protein of 290 kDa-like [Sus scrofa]	44	2	2	122846	5	0	1	511.238	1020.46	2	1019.55	0.9103	1	13.37	27	35	8	K	LKIMQEMK	N
104	gi|194037700	PREDICTED: centrosomal protein of 290 kDa-like [Sus scrofa]	44	2	2	124973	4	1	1	516.825	1031.64	2	1031.55	0.0858	0	13.7	32	35	8.2	K	LSSENIELK	F
104	gi|194037700	PREDICTED: centrosomal protein of 290 kDa-like [Sus scrofa]	44	2	2	125014	5	1	1	517.063	1032.11	2	1031.55	0.5614	0	15.56		34	4.2	K	LSSENIELK	F
104	gi|194037700	PREDICTED: centrosomal protein of 290 kDa-like [Sus scrofa]	44	2	2	125023	4	1	1	517.105	1032.2	2	1031.55	0.646	0	15.06	32	35	5.9	K	LSSENIELK	F
104	gi|194037700	PREDICTED: centrosomal protein of 290 kDa-like [Sus scrofa]	44	2	2	133188	1	1	1	539.939	1077.86	2	1077.48	0.3876	0	37.18	33	35	0.031	R	AEMTAAAEER	I
104	gi|194037700	PREDICTED: centrosomal protein of 290 kDa-like [Sus scrofa]	44	2	2	133218	2	1	1	540.021	1078.03	2	1077.48	0.5524	0	18.19	30	33	1.7	R	AEMTAAAEER	I
104	gi|194037700	PREDICTED: centrosomal protein of 290 kDa-like [Sus scrofa]	44	2	2	133991	1	1	1	542.104	1082.19	2	1081.52	0.6711	1	16.83	25	34	2.8	K	EFENMKLR	L
104	gi|194037700	PREDICTED: centrosomal protein of 290 kDa-like [Sus scrofa]	44	2	2	134086	3	1	1	542.307	1082.6	2	1081.52	1.0767	1	13.03	28	34	7.5	K	EFENMKLR	L
104	gi|194037700	PREDICTED: centrosomal protein of 290 kDa-like [Sus scrofa]	44	2	2	134861	4	1	1	1087.33	1086.32	1	1086.59	-0.2683	0	19.56	35	35	2	K	QSLIEELQK	K
104	gi|194037700	PREDICTED: centrosomal protein of 290 kDa-like [Sus scrofa]	44	2	2	134866	5	1	1	1087.34	1086.33	1	1086.59	-0.2593	0	18.8		35	2.4	K	QSLIEELQK	K
104	gi|194037700	PREDICTED: centrosomal protein of 290 kDa-like [Sus scrofa]	44	2	2	134881	2	1	1	1087.39	1086.39	1	1086.59	-0.2053	0	20.76	35	35	1.5	K	QSLIEELQK	K
104	gi|194037700	PREDICTED: centrosomal protein of 290 kDa-like [Sus scrofa]	44	2	2	134883	1	1	1	544.202	1086.39	2	1086.59	-0.2028	0	40.66		35	0.016	K	QSLIEELQK	K
104	gi|194037700	PREDICTED: centrosomal protein of 290 kDa-like [Sus scrofa]	44	2	2	134905	2	1	1	544.251	1086.49	2	1086.59	-0.1046	0	25.22		35	0.55	K	QSLIEELQK	K
104	gi|194037700	PREDICTED: centrosomal protein of 290 kDa-like [Sus scrofa]	44	2	2	134935	1	1	1	544.307	1086.6	2	1086.59	0.0082	0	25.65	32	35	0.5	K	QSLIEELQK	K
104	gi|194037700	PREDICTED: centrosomal protein of 290 kDa-like [Sus scrofa]	44	2	2	135082	3	1	1	544.503	1086.99	2	1086.59	0.3996	0	22.27		34	0.86	K	QSLIEELQK	K
104	gi|194037700	PREDICTED: centrosomal protein of 290 kDa-like [Sus scrofa]	44	2	2	135086	1	1	1	544.51	1087	2	1086.59	0.4124	0	31.27		34	0.1	K	QSLIEELQK	K
104	gi|194037700	PREDICTED: centrosomal protein of 290 kDa-like [Sus scrofa]	44	2	2	135119	3	1	1	544.541	1087.07	2	1086.59	0.476	0	18.67		34	1.7	K	QSLIEELQK	K
104	gi|194037700	PREDICTED: centrosomal protein of 290 kDa-like [Sus scrofa]	44	2	2	135142	3	1	1	544.575	1087.13	2	1086.59	0.543	0	22.23		34	0.84	K	QSLIEELQK	K
104	gi|194037700	PREDICTED: centrosomal protein of 290 kDa-like [Sus scrofa]	44	2	2	135228	2	1	1	1088.48	1087.47	1	1086.59	0.8807	0	22.84	31	35	0.95	K	QSLIEELQK	K
104	gi|194037700	PREDICTED: centrosomal protein of 290 kDa-like [Sus scrofa]	44	2	2	135290	4	1	1	363.571	1087.69	3	1086.59	1.0985	0	13.41	29	35	8.4	K	QSLIEELQK	K
104	gi|194037700	PREDICTED: centrosomal protein of 290 kDa-like [Sus scrofa]	44	2	2	135319	1	1	1	363.605	1087.79	3	1086.59	1.2008	0	20.33	32	35	1.7	K	QSLIEELQK	K
104	gi|194037700	PREDICTED: centrosomal protein of 290 kDa-like [Sus scrofa]	44	2	2	187003	2	1	1	658.995	1315.97	2	1314.74	1.2354	1	15.58	27	34	4.1	R	EIEVLTKEINK	L
104	gi|194037700	PREDICTED: centrosomal protein of 290 kDa-like [Sus scrofa]	44	2	2	193668	2	1	1	675.477	1348.94	2	1349.64	-0.6961	1	14.49	28	34	5.2	K	EANSRAPTTTMR	N
104	gi|194037700	PREDICTED: centrosomal protein of 290 kDa-like [Sus scrofa]	44	2	2	200104	1	1	1	688.032	1374.05	2	1373.7	0.3453	0	16.52	29	34	3	K	SQVEDLSENILK	L
104	gi|194037700	PREDICTED: centrosomal protein of 290 kDa-like [Sus scrofa]	44	2	2	203117	2	1	1	464.16	1389.46	3	1390.77	-1.3092	1	13.68	27	34	6.1	K	SVTNSEIVSISKK	I
104	gi|194037700	PREDICTED: centrosomal protein of 290 kDa-like [Sus scrofa]	44	2	2	203139	5	1	1	464.214	1389.62	3	1390.77	-1.1469	1	13.34	29	34	6.6	K	SVTNSEIVSISKK	I
104	gi|194037700	PREDICTED: centrosomal protein of 290 kDa-like [Sus scrofa]	44	2	2	203433	2	1	1	464.723	1391.15	3	1390.77	0.381	1	13.37	22	33	4.8	R	KSVTNSEIVSISK	K
104	gi|194037700	PREDICTED: centrosomal protein of 290 kDa-like [Sus scrofa]	44	2	2	207108	2	1	1	705.493	1408.97	2	1409.66	-0.6937	0	13.8	27	34	5.6	K	TTGMTVDQVMGVR	A
104	gi|194037700	PREDICTED: centrosomal protein of 290 kDa-like [Sus scrofa]	44	2	2	207147	1	1	1	705.534	1409.05	2	1409.66	-0.6099	0	13.25	22	34	5.9	K	TTGMTVDQVMGVR	A	0.02
108	gi|350591252	PREDICTED: RNA-binding protein 5 [Sus scrofa]	43	2	2	46768	4	1	0	519.116	518.109	1	518.281	-0.1727	0	15.74	32	37	8.4	K	TGVSR	G
108	gi|350591252	PREDICTED: RNA-binding protein 5 [Sus scrofa]	43	2	2	53811	1	1	0	562.841	561.833	1	561.287	0.5463	1	13.64	25	35	7.5	M	GSDKR	V
108	gi|350591252	PREDICTED: RNA-binding protein 5 [Sus scrofa]	43	2	2	68633	1	1	0	337.848	673.682	2	674.335	-0.6531	0	15.44	27	37	8.1	R	EGSGLGR	K
108	gi|350591252	PREDICTED: RNA-binding protein 5 [Sus scrofa]	43	2	2	68656	1	1	0	338.046	674.077	2	674.335	-0.2581	0	33.07	29	37	0.14	R	EGSGLGR	K
108	gi|350591252	PREDICTED: RNA-binding protein 5 [Sus scrofa]	43	2	2	68657	1	1	0	338.047	674.079	2	674.335	-0.2561	0	21.5	26	37	1.9	R	EGSGLGR	K
108	gi|350591252	PREDICTED: RNA-binding protein 5 [Sus scrofa]	43	2	2	68698	1	1	0	675.355	674.348	1	674.335	0.0133	0	15.13	27	37	8.4	R	EGSGLGR	K
108	gi|350591252	PREDICTED: RNA-binding protein 5 [Sus scrofa]	43	2	2	68707	1	1	0	675.436	674.429	1	674.335	0.0943	0	13.12	25	37	13	R	EGSGLGR	K
108	gi|350591252	PREDICTED: RNA-binding protein 5 [Sus scrofa]	43	2	2	68710	1	1	0	338.34	674.665	2	674.335	0.3301	0	19.1	23	37	3.4	R	EGSGLGR	K
108	gi|350591252	PREDICTED: RNA-binding protein 5 [Sus scrofa]	43	2	2	68711	1	1	0	338.353	674.691	2	674.335	0.3567	0	37.39		37	0.05	R	EGSGLGR	K
108	gi|350591252	PREDICTED: RNA-binding protein 5 [Sus scrofa]	43	2	2	68712	1	1	0	338.356	674.698	2	674.335	0.3631	0	22.23	34	37	1.6	R	EGSGLGR	K
108	gi|350591252	PREDICTED: RNA-binding protein 5 [Sus scrofa]	43	2	2	68717	1	1	0	338.526	675.037	2	674.335	0.7021	0	14.34	27	36	9	R	EGSGLGR	K
108	gi|350591252	PREDICTED: RNA-binding protein 5 [Sus scrofa]	43	2	2	79091	1	1	0	373.124	744.234	2	743.429	0.8051	1	13.81	23	37	11	K	KGALAER	Q
108	gi|350591252	PREDICTED: RNA-binding protein 5 [Sus scrofa]	43	2	2	107355	1	1	1	470.494	938.973	2	938.428	0.5455	0	15.68	21	33	2.8	K	QNMDIYR	R
108	gi|350591252	PREDICTED: RNA-binding protein 5 [Sus scrofa]	43	2	2	153450	1	1	1	586.424	1170.83	2	1170.56	0.271	1	40.26		35	0.015	R	NGDEENPLKR	G
108	gi|350591252	PREDICTED: RNA-binding protein 5 [Sus scrofa]	43	2	2	153452	1	1	1	586.433	1170.85	2	1170.56	0.2884	1	26.02	34	35	0.4	R	NGDEENPLKR	G	0.07

## Sheet: invivo_EHEC_100402_Protein
Prot ID	Accession	Description	Mascot Score	# PSMs	# Peptides	Pr Coverage	Pr Length	MW (kDa)	pI
1	gi|242253868	trypsinogen precursor [Sus scrofa]	2460	66	3	23.6	246	26549	6.85
2	gi|350579657	PREDICTED: 78 kDa glucose-regulated protein [Sus scrofa]	837	18	1	8.2	659	73167	5.43
3	gi|178056512	heat shock 70 kDa protein 1-like [Sus scrofa]	837	18	1	6.2	641	70699	6.01
4	gi|311252272	PREDICTED: lithostathine-like isoform 1 [Sus scrofa]	732	19	4	27.3	176	19853	5.3
5	gi|221325622	regenerating islet-derived protein 3-gamma precursor [Sus scrofa]	706	18	3	27.3	176	19707	6.07
6	gi|335309396	PREDICTED: adenylate kinase 2, mitochondrial-like isoform 1 [Sus scrofa]	615	18	1	8.3	228	25328	6.24
7	gi|350583977	PREDICTED: keratin, type II cytoskeletal 1 [Sus scrofa]	596	16	3	10	629	65381	8.18
8	gi|350583970	PREDICTED: keratin, type II cytoskeletal 75-like [Sus scrofa]	451	16	3	10.5	551	59845	8.45
9	gi|350580796	PREDICTED: hypothetical protein LOC100522363 [Sus scrofa]	384	11	5	19.3	576	60839	11.55
10	gi|350583957	PREDICTED: keratin, type II cuticular Hb4 [Sus scrofa]	334	11	6	22.1	593	64553	8.12
11	gi|114703738	deleted in malignant brain tumors 1 protein precursor [Sus scrofa]	299	8	3	4.2	1349	151127	5.42
12	gi|47523278	resistin precursor [Sus scrofa]	288	7	2	22	109	12312	8.03
13	gi|329744642	glyceraldehyde-3-phosphate dehydrogenase [Sus scrofa]	285	30	2	4.5	333	36041	8.51
14	gi|335297667	PREDICTED: keratin, type I cuticular Ha6 isoform 2 [Sus scrofa]	256	8	5	21.1	459	52340	4.86
15	gi|211578396	uncharacterized protein LOC100156145 [Sus scrofa]	254	3	1	6.6	457	50768	8.54
18	gi|194037336	PREDICTED: keratin, type II cytoskeletal 1b [Sus scrofa]	174	9	3	13.9	595	63962	5.75
19	gi|148747492	keratin, type II cytoskeletal 2 epidermal [Sus scrofa]	148	4	1	10.4	642	66510	7.47
20	gi|350584000	PREDICTED: keratin, type II cytoskeletal 78-like [Sus scrofa]	146	4	1	11.7	394	42842	9.23
21	gi|335297670	PREDICTED: keratin, type I microfibrillar, 47.6 kDa-like [Sus scrofa]	122	2	1	14.4	403	46796	4.73
22	gi|311267256	PREDICTED: keratin, type I cuticular Ha2 [Sus scrofa]	122	2	1	11.3	460	52563	4.89
26	gi|311267330	PREDICTED: keratin, type I cytoskeletal 10-like [Sus scrofa]	113	4	3	14	613	62835	4.98
27	gi|350579257	PREDICTED: glycine dehydrogenase [decarboxylating], mitochondrial-like [Sus scrofa]	112	3	1	3.2	755	84439	6.81
34	gi|311255413	PREDICTED: keratin, type II cytoskeletal 79 [Sus scrofa]	101	7	3	18.3	535	58094	6.45
35	gi|311255373	PREDICTED: keratin, type II cuticular Hb3-like [Sus scrofa]	100	2	2	15.8	493	55576	5.59
36	gi|311255369	PREDICTED: keratin, type II cuticular Hb1-like isoform 4 [Sus scrofa]	100	2	2	14.7	498	56299	5.91
40	gi|335287827	PREDICTED: keratin, type II cytoskeletal 73 [Sus scrofa]	87	6	2	12.7	518	57348	6.18
41	gi|345091038	keratin 74 [Sus scrofa]	87	6	2	8.1	531	58219	6.78
42	gi|47523720	glucose-6-phosphate isomerase [Sus scrofa]	87	3	2	9	558	63257	7.79
43	gi|350580091	PREDICTED: proteoglycan 3-like [Sus scrofa]	86	2	1	10.3	224	25512	5.16
44	gi|194037334	PREDICTED: keratin, type II cytoskeletal 3-like [Sus scrofa]	86	6	2	11	655	68106	7.08
45	gi|350583995	PREDICTED: keratin, type II cytoskeletal 75-like [Sus scrofa]	86	6	2	18	466	51982	6.15
46	gi|350583998	PREDICTED: hypothetical protein LOC100157304 [Sus scrofa]	86	6	2	14.2	643	65497	8.03
47	gi|311255411	PREDICTED: LOW QUALITY PROTEIN: keratin, type II cytoskeletal 4 [Sus scrofa]	86	6	2	10.1	611	66127	8.12
49	gi|346421372	ferritin, light polypeptide [Sus scrofa]	77	4	2	26.3	175	20165	5.75
50	gi|47523546	myoglobin [Sus scrofa]	76	3	2	16.2	154	17074	6.75
57	gi|350585167	PREDICTED: LOW QUALITY PROTEIN: zinc finger protein 345-like [Sus scrofa]	68	12	2	4.2	549	64704	9.25
61	gi|311261653	PREDICTED: protein KIAA0284-like [Sus scrofa]	64	6	2	3.3	1542	165726	6.52
107	gi|350591252	PREDICTED: RNA-binding protein 5 [Sus scrofa]	43	2	2	3.8	815	92679	5.94

## Sheet: invivo_EHEC_100402_psms
Prot ID	Accession	Description	Mascot Score	# PSMs	# Peptides	Pep_query	Pep_rank	Pep_isbold	Pep_isunique	Pep_exp_mz	Pep_exp_mr	Pep_exp_z	Pep_calc_mr	Pep_delta	Pep_miss	Pep_score	Pep_homol	Pep_ident	Pep_expect	Pep_res_before	Pep_seq	Pep_res_after
1	gi|242253868	trypsinogen precursor [Sus scrofa]	2460	66	3	91604	1	1	1	421.296	840.577	2	841.502	-0.9251	0	20.04	26	34	1.5	R	VATVSLPR	S
1	gi|242253868	trypsinogen precursor [Sus scrofa]	2460	66	3	91652	1	1	1	843.41	842.403	1	841.502	0.901	0	32.64	24	36	0.11	R	VATVSLPR	S
1	gi|242253868	trypsinogen precursor [Sus scrofa]	2460	66	3	91654	1	1	1	843.435	842.428	1	841.502	0.9255	0	34.31	24	36	0.075	R	VATVSLPR	S
1	gi|242253868	trypsinogen precursor [Sus scrofa]	2460	66	3	91655	1	1	1	843.438	842.43	1	841.502	0.9283	0	37.81	27	36	0.033	R	VATVSLPR	S
1	gi|242253868	trypsinogen precursor [Sus scrofa]	2460	66	3	91657	1	1	1	843.451	842.443	1	841.502	0.9412	0	34.16	26	36	0.077	R	VATVSLPR	S
1	gi|242253868	trypsinogen precursor [Sus scrofa]	2460	66	3	91659	1	1	1	843.486	842.479	1	841.502	0.9766	0	32.5	26	36	0.11	R	VATVSLPR	S
1	gi|242253868	trypsinogen precursor [Sus scrofa]	2460	66	3	123287	1	1	1	523.25	1044.49	2	1044.56	-0.0701	0	52.74		35	0.00096	K	LSSPATLNSR	V
1	gi|242253868	trypsinogen precursor [Sus scrofa]	2460	66	3	123358	1	1	1	523.414	1044.81	2	1044.56	0.2575	0	19.2	31	35	2.2	K	LSSPATLNSR	V
1	gi|242253868	trypsinogen precursor [Sus scrofa]	2460	66	3	123402	1	1	1	523.482	1044.95	2	1044.56	0.3937	0	52.68		34	0.00082	K	LSSPATLNSR	V
1	gi|242253868	trypsinogen precursor [Sus scrofa]	2460	66	3	123414	1	1	1	523.493	1044.97	2	1044.56	0.4147	0	52.67		34	0.00077	K	LSSPATLNSR	V
1	gi|242253868	trypsinogen precursor [Sus scrofa]	2460	66	3	123437	1	1	1	523.529	1045.04	2	1044.56	0.4865	0	54.61		33	0.00043	K	LSSPATLNSR	V
1	gi|242253868	trypsinogen precursor [Sus scrofa]	2460	66	3	309261	1	1	1	737.394	2209.16	3	2210.1	-0.9381	0	35.07	18	32	0.026	R	LGEHNIDVLEGNEQFINAAK	I
1	gi|242253868	trypsinogen precursor [Sus scrofa]	2460	66	3	309266	1	1	1	737.414	2209.22	3	2210.1	-0.8769	0	71.54	25	32	5.8e-06	R	LGEHNIDVLEGNEQFINAAK	I
1	gi|242253868	trypsinogen precursor [Sus scrofa]	2460	66	3	309267	1	1	1	1105.62	2209.22	2	2210.1	-0.8753	0	60.49	17	32	7.4e-05	R	LGEHNIDVLEGNEQFINAAK	I
1	gi|242253868	trypsinogen precursor [Sus scrofa]	2460	66	3	309297	1	1	1	737.475	2209.4	3	2210.1	-0.6936	0	45.58	20	31	0.0022	R	LGEHNIDVLEGNEQFINAAK	I
1	gi|242253868	trypsinogen precursor [Sus scrofa]	2460	66	3	309301	1	1	1	737.485	2209.43	3	2210.1	-0.6648	0	72.83	20	31	4e-06	R	LGEHNIDVLEGNEQFINAAK	I
1	gi|242253868	trypsinogen precursor [Sus scrofa]	2460	66	3	309311	1	1	1	737.511	2209.51	3	2210.1	-0.5865	0	80.33	29	31	6.4e-07	R	LGEHNIDVLEGNEQFINAAK	I
1	gi|242253868	trypsinogen precursor [Sus scrofa]	2460	66	3	309320	1	1	1	737.534	2209.58	3	2210.1	-0.5178	0	60.12	26	31	6.1e-05	R	LGEHNIDVLEGNEQFINAAK	I
1	gi|242253868	trypsinogen precursor [Sus scrofa]	2460	66	3	309328	1	1	1	737.545	2209.61	3	2210.1	-0.4836	0	53.24	25	31	0.00031	R	LGEHNIDVLEGNEQFINAAK	I
1	gi|242253868	trypsinogen precursor [Sus scrofa]	2460	66	3	309338	1	1	1	737.565	2209.67	3	2210.1	-0.4239	0	34.83	18	31	0.023	R	LGEHNIDVLEGNEQFINAAK	I
1	gi|242253868	trypsinogen precursor [Sus scrofa]	2460	66	3	309354	1	1	1	737.608	2209.8	3	2210.1	-0.2952	0	27.81	16	32	0.14	R	LGEHNIDVLEGNEQFINAAK	I
1	gi|242253868	trypsinogen precursor [Sus scrofa]	2460	66	3	309366	1	1	1	737.629	2209.86	3	2210.1	-0.2322	0	32.89	19	32	0.045	R	LGEHNIDVLEGNEQFINAAK	I
1	gi|242253868	trypsinogen precursor [Sus scrofa]	2460	66	3	309371	1	1	1	737.651	2209.93	3	2210.1	-0.165	0	64.07	25	32	3.4e-05	R	LGEHNIDVLEGNEQFINAAK	I
1	gi|242253868	trypsinogen precursor [Sus scrofa]	2460	66	3	309373	1	1	1	737.66	2209.96	3	2210.1	-0.1389	0	34.9	27	32	0.029	R	LGEHNIDVLEGNEQFINAAK	I
1	gi|242253868	trypsinogen precursor [Sus scrofa]	2460	66	3	309374	1	1	1	737.667	2209.98	3	2210.1	-0.1164	0	48.16	23	32	0.0013	R	LGEHNIDVLEGNEQFINAAK	I
1	gi|242253868	trypsinogen precursor [Sus scrofa]	2460	66	3	309380	1	1	1	737.676	2210.01	3	2210.1	-0.0903	0	75.23	24	32	2.6e-06	R	LGEHNIDVLEGNEQFINAAK	I
1	gi|242253868	trypsinogen precursor [Sus scrofa]	2460	66	3	309382	1	1	1	737.681	2210.02	3	2210.1	-0.0768	0	70.09	25	32	8.6e-06	R	LGEHNIDVLEGNEQFINAAK	I
1	gi|242253868	trypsinogen precursor [Sus scrofa]	2460	66	3	309390	1	1	1	737.71	2210.11	3	2210.1	0.0117	0	64.55	25	32	3.1e-05	R	LGEHNIDVLEGNEQFINAAK	I
1	gi|242253868	trypsinogen precursor [Sus scrofa]	2460	66	3	309400	1	1	1	1106.1	2210.19	2	2210.1	0.0927	0	84.46	24	32	3.2e-07	R	LGEHNIDVLEGNEQFINAAK	I
1	gi|242253868	trypsinogen precursor [Sus scrofa]	2460	66	3	309402	1	1	1	1106.12	2210.22	2	2210.1	0.1247	0	73.9	20	32	3.6e-06	R	LGEHNIDVLEGNEQFINAAK	I
1	gi|242253868	trypsinogen precursor [Sus scrofa]	2460	66	3	309404	1	1	1	1106.12	2210.23	2	2210.1	0.1347	0	106.44		32	2e-09	R	LGEHNIDVLEGNEQFINAAK	I
1	gi|242253868	trypsinogen precursor [Sus scrofa]	2460	66	3	309406	1	1	1	1106.13	2210.25	2	2210.1	0.1527	0	110.81	31	32	7.3e-10	R	LGEHNIDVLEGNEQFINAAK	I
1	gi|242253868	trypsinogen precursor [Sus scrofa]	2460	66	3	309408	1	1	1	1106.13	2210.26	2	2210.1	0.1587	0	46.78		32	0.0018	R	LGEHNIDVLEGNEQFINAAK	I
1	gi|242253868	trypsinogen precursor [Sus scrofa]	2460	66	3	309409	1	1	1	1106.13	2210.26	2	2210.1	0.1587	0	106.55	25	32	1.9e-09	R	LGEHNIDVLEGNEQFINAAK	I
1	gi|242253868	trypsinogen precursor [Sus scrofa]	2460	66	3	309411	1	1	1	1106.16	2210.31	2	2210.1	0.2087	0	108.38	25	32	1.3e-09	R	LGEHNIDVLEGNEQFINAAK	I
1	gi|242253868	trypsinogen precursor [Sus scrofa]	2460	66	3	309412	1	1	1	737.776	2210.31	3	2210.1	0.2103	0	37.06	20	32	0.017	R	LGEHNIDVLEGNEQFINAAK	I
1	gi|242253868	trypsinogen precursor [Sus scrofa]	2460	66	3	309418	1	1	1	737.791	2210.35	3	2210.1	0.2541	0	58.63	28	32	0.00012	R	LGEHNIDVLEGNEQFINAAK	I
1	gi|242253868	trypsinogen precursor [Sus scrofa]	2460	66	3	309419	1	1	1	1106.19	2210.37	2	2210.1	0.2687	0	21.68	29	32	0.58	R	LGEHNIDVLEGNEQFINAAK	I
1	gi|242253868	trypsinogen precursor [Sus scrofa]	2460	66	3	309420	1	1	1	1106.19	2210.37	2	2210.1	0.2707	0	108.64	31	32	1.2e-09	R	LGEHNIDVLEGNEQFINAAK	I
1	gi|242253868	trypsinogen precursor [Sus scrofa]	2460	66	3	309421	1	1	1	737.798	2210.37	3	2210.1	0.2769	0	20.15	14	32	0.83	R	LGEHNIDVLEGNEQFINAAK	I
1	gi|242253868	trypsinogen precursor [Sus scrofa]	2460	66	3	309422	1	1	1	737.807	2210.4	3	2210.1	0.3033	0	28.66		32	0.11	R	LGEHNIDVLEGNEQFINAAK	I
1	gi|242253868	trypsinogen precursor [Sus scrofa]	2460	66	3	309425	1	1	1	737.824	2210.45	3	2210.1	0.3525	0	35.78	22	31	0.021	R	LGEHNIDVLEGNEQFINAAK	I
1	gi|242253868	trypsinogen precursor [Sus scrofa]	2460	66	3	309427	1	1	1	1106.27	2210.52	2	2210.1	0.4267	0	17.27	16	31	1.3	R	LGEHNIDVLEGNEQFINAAK	I
1	gi|242253868	trypsinogen precursor [Sus scrofa]	2460	66	3	309429	1	1	1	737.852	2210.53	3	2210.1	0.4374	0	39.44	31	31	0.0079	R	LGEHNIDVLEGNEQFINAAK	I
1	gi|242253868	trypsinogen precursor [Sus scrofa]	2460	66	3	309431	1	1	1	737.865	2210.57	3	2210.1	0.4758	0	49.41	23	31	0.00076	R	LGEHNIDVLEGNEQFINAAK	I
1	gi|242253868	trypsinogen precursor [Sus scrofa]	2460	66	3	309432	1	1	1	737.876	2210.61	3	2210.1	0.5091	0	43.28	22	31	0.0031	R	LGEHNIDVLEGNEQFINAAK	I
1	gi|242253868	trypsinogen precursor [Sus scrofa]	2460	66	3	309433	1	1	1	737.877	2210.61	3	2210.1	0.5136	0	70.47	24	31	6e-06	R	LGEHNIDVLEGNEQFINAAK	I
1	gi|242253868	trypsinogen precursor [Sus scrofa]	2460	66	3	309435	1	1	1	737.887	2210.64	3	2210.1	0.5427	0	53.93	19	31	0.00028	R	LGEHNIDVLEGNEQFINAAK	I
1	gi|242253868	trypsinogen precursor [Sus scrofa]	2460	66	3	309440	1	1	1	737.904	2210.69	3	2210.1	0.5946	0	40.07	19	31	0.0073	R	LGEHNIDVLEGNEQFINAAK	I
1	gi|242253868	trypsinogen precursor [Sus scrofa]	2460	66	3	309441	1	1	1	737.905	2210.69	3	2210.1	0.597	0	49.21	19	31	0.00089	R	LGEHNIDVLEGNEQFINAAK	I
1	gi|242253868	trypsinogen precursor [Sus scrofa]	2460	66	3	309447	1	1	1	737.926	2210.76	3	2210.1	0.6606	0	56.86	24	32	0.00017	R	LGEHNIDVLEGNEQFINAAK	I
1	gi|242253868	trypsinogen precursor [Sus scrofa]	2460	66	3	309449	1	1	1	737.936	2210.78	3	2210.1	0.6879	0	61.91	22	32	5.4e-05	R	LGEHNIDVLEGNEQFINAAK	I
1	gi|242253868	trypsinogen precursor [Sus scrofa]	2460	66	3	309450	1	1	1	737.937	2210.79	3	2210.1	0.6936	0	42.83	18	32	0.0044	R	LGEHNIDVLEGNEQFINAAK	I
1	gi|242253868	trypsinogen precursor [Sus scrofa]	2460	66	3	309452	1	1	1	1106.41	2210.81	2	2210.1	0.7167	0	103.38	25	32	3.9e-09	R	LGEHNIDVLEGNEQFINAAK	I
1	gi|242253868	trypsinogen precursor [Sus scrofa]	2460	66	3	309453	1	1	1	737.965	2210.87	3	2210.1	0.777	0	27.46	18	32	0.16	R	LGEHNIDVLEGNEQFINAAK	I
1	gi|242253868	trypsinogen precursor [Sus scrofa]	2460	66	3	309455	1	1	1	737.971	2210.89	3	2210.1	0.7947	0	32.77	18	32	0.046	R	LGEHNIDVLEGNEQFINAAK	I
1	gi|242253868	trypsinogen precursor [Sus scrofa]	2460	66	3	309456	1	1	1	737.981	2210.92	3	2210.1	0.8238	0	47.41	17	32	0.0016	R	LGEHNIDVLEGNEQFINAAK	I
1	gi|242253868	trypsinogen precursor [Sus scrofa]	2460	66	3	309457	1	1	1	737.982	2210.93	3	2210.1	0.8286	0	34.38	19	32	0.032	R	LGEHNIDVLEGNEQFINAAK	I
1	gi|242253868	trypsinogen precursor [Sus scrofa]	2460	66	3	309459	1	1	1	738.019	2211.04	3	2210.1	0.9387	0	59.77	28	32	9.2e-05	R	LGEHNIDVLEGNEQFINAAK	I
1	gi|242253868	trypsinogen precursor [Sus scrofa]	2460	66	3	309461	1	1	1	738.021	2211.04	3	2210.1	0.9447	0	52.54	22	32	0.00049	R	LGEHNIDVLEGNEQFINAAK	I
1	gi|242253868	trypsinogen precursor [Sus scrofa]	2460	66	3	309463	1	1	1	738.025	2211.05	3	2210.1	0.9552	0	51.59	22	32	0.00061	R	LGEHNIDVLEGNEQFINAAK	I
1	gi|242253868	trypsinogen precursor [Sus scrofa]	2460	66	3	309465	1	1	1	738.027	2211.06	3	2210.1	0.9624	0	35.82	18	32	0.023	R	LGEHNIDVLEGNEQFINAAK	I
1	gi|242253868	trypsinogen precursor [Sus scrofa]	2460	66	3	309468	1	1	1	738.03	2211.07	3	2210.1	0.9723	0	46.61	26	32	0.0019	R	LGEHNIDVLEGNEQFINAAK	I
1	gi|242253868	trypsinogen precursor [Sus scrofa]	2460	66	3	309472	1	1	1	738.035	2211.08	3	2210.1	0.9861	0	68.54	26	32	1.2e-05	R	LGEHNIDVLEGNEQFINAAK	I
1	gi|242253868	trypsinogen precursor [Sus scrofa]	2460	66	3	309473	1	1	1	738.038	2211.09	3	2210.1	0.9954	0	61.61	22	32	6.1e-05	R	LGEHNIDVLEGNEQFINAAK	I
1	gi|242253868	trypsinogen precursor [Sus scrofa]	2460	66	3	309478	1	1	1	738.054	2211.14	3	2210.1	1.0443	0	36.09	20	32	0.022	R	LGEHNIDVLEGNEQFINAAK	I
1	gi|242253868	trypsinogen precursor [Sus scrofa]	2460	66	3	309479	1	1	1	738.067	2211.18	3	2210.1	1.0812	0	53.87	21	32	0.00036	R	LGEHNIDVLEGNEQFINAAK	I
1	gi|242253868	trypsinogen precursor [Sus scrofa]	2460	66	3	309483	1	1	1	738.074	2211.2	3	2210.1	1.1031	0	64.03	25	32	3.5e-05	R	LGEHNIDVLEGNEQFINAAK	I
1	gi|242253868	trypsinogen precursor [Sus scrofa]	2460	66	3	309484	1	1	1	1106.61	2211.21	2	2210.1	1.1107	0	93.03	24	32	4.4e-08	R	LGEHNIDVLEGNEQFINAAK	I
1	gi|242253868	trypsinogen precursor [Sus scrofa]	2460	66	3	309488	1	1	1	738.09	2211.25	3	2210.1	1.1514	0	38.59	21	32	0.012	R	LGEHNIDVLEGNEQFINAAK	I
1	gi|242253868	trypsinogen precursor [Sus scrofa]	2460	66	3	309490	1	1	1	738.092	2211.25	3	2210.1	1.1571	0	61.06	19	32	6.9e-05	R	LGEHNIDVLEGNEQFINAAK	I
1	gi|242253868	trypsinogen precursor [Sus scrofa]	2460	66	3	309491	1	1	1	738.093	2211.26	3	2210.1	1.1604	0	22.67		32	0.47	R	LGEHNIDVLEGNEQFINAAK	I
1	gi|242253868	trypsinogen precursor [Sus scrofa]	2460	66	3	309492	1	1	1	738.093	2211.26	3	2210.1	1.1616	0	32.26	17	32	0.052	R	LGEHNIDVLEGNEQFINAAK	I
1	gi|242253868	trypsinogen precursor [Sus scrofa]	2460	66	3	309493	1	1	1	1106.64	2211.27	2	2210.1	1.1687	0	92.96	21	32	4.4e-08	R	LGEHNIDVLEGNEQFINAAK	I
1	gi|242253868	trypsinogen precursor [Sus scrofa]	2460	66	3	309494	1	1	1	1106.64	2211.28	2	2210.1	1.1787	0	95.51	24	32	2.5e-08	R	LGEHNIDVLEGNEQFINAAK	I
1	gi|242253868	trypsinogen precursor [Sus scrofa]	2460	66	3	309497	1	1	1	738.108	2211.3	3	2210.1	1.2054	0	53.02	21	32	0.00044	R	LGEHNIDVLEGNEQFINAAK	I
1	gi|242253868	trypsinogen precursor [Sus scrofa]	2460	66	3	309501	1	1	1	738.125	2211.35	3	2210.1	1.2576	0	51.28	19	32	0.00064	R	LGEHNIDVLEGNEQFINAAK	I
1	gi|242253868	trypsinogen precursor [Sus scrofa]	2460	66	3	309503	1	1	1	738.13	2211.37	3	2210.1	1.2699	0	72.28	23	32	5.1e-06	R	LGEHNIDVLEGNEQFINAAK	I
1	gi|242253868	trypsinogen precursor [Sus scrofa]	2460	66	3	309506	1	1	1	738.133	2211.38	3	2210.1	1.281	0	26.37	15	32	0.2	R	LGEHNIDVLEGNEQFINAAK	I
1	gi|242253868	trypsinogen precursor [Sus scrofa]	2460	66	3	309509	1	1	1	738.146	2211.42	3	2210.1	1.3191	0	32.24	19	32	0.05	R	LGEHNIDVLEGNEQFINAAK	I
1	gi|242253868	trypsinogen precursor [Sus scrofa]	2460	66	3	309516	1	1	1	738.157	2211.45	3	2210.1	1.3515	0	28.6	18	32	0.11	R	LGEHNIDVLEGNEQFINAAK	I
1	gi|242253868	trypsinogen precursor [Sus scrofa]	2460	66	3	315879	1	1	1	767.364	2299.07	3	2298.17	0.9027	0	14.37	21	32	3.2	K	IITHPNFNGNTLDNDIMLIK	L	Oxidation (M)	0.00000000000000001000.0	emPAI	0.61
2	gi|350579657	PREDICTED: 78 kDa glucose-regulated protein [Sus scrofa]	837	18	1	240247	1	1	0	830.316	1658.62	2	1658.89	-0.2708	0	109.22	32	33	1.4e-09	R	IINEPTAAAIAYGLDK	R
2	gi|350579657	PREDICTED: 78 kDa glucose-regulated protein [Sus scrofa]	837	18	1	240254	1	1	0	830.35	1658.69	2	1658.89	-0.2022	0	115.87	31	33	3.1e-10	R	IINEPTAAAIAYGLDK	R
2	gi|350579657	PREDICTED: 78 kDa glucose-regulated protein [Sus scrofa]	837	18	1	240275	1	1	0	830.466	1658.92	2	1658.89	0.0294	0	91.44	31	33	8.6e-08	R	IINEPTAAAIAYGLDK	R
2	gi|350579657	PREDICTED: 78 kDa glucose-regulated protein [Sus scrofa]	837	18	1	240278	1	1	0	830.485	1658.96	2	1658.89	0.0678	0	100.41	24	33	1.1e-08	R	IINEPTAAAIAYGLDK	R
2	gi|350579657	PREDICTED: 78 kDa glucose-regulated protein [Sus scrofa]	837	18	1	240296	1	1	0	830.574	1659.13	2	1658.89	0.2448	0	98.47	28	33	1.7e-08	R	IINEPTAAAIAYGLDK	R
2	gi|350579657	PREDICTED: 78 kDa glucose-regulated protein [Sus scrofa]	837	18	1	240315	1	1	0	830.627	1659.24	2	1658.89	0.3512	0	109.94	31	32	1e-09	R	IINEPTAAAIAYGLDK	R
2	gi|350579657	PREDICTED: 78 kDa glucose-regulated protein [Sus scrofa]	837	18	1	240323	1	1	0	830.65	1659.29	2	1658.89	0.3986	0	109.93		32	9.2e-10	R	IINEPTAAAIAYGLDK	R
2	gi|350579657	PREDICTED: 78 kDa glucose-regulated protein [Sus scrofa]	837	18	1	240454	1	1	0	831.128	1660.24	2	1658.89	1.353	0	93.57	31	32	4.4e-08	R	IINEPTAAAIAYGLDK	R
2	gi|350579657	PREDICTED: 78 kDa glucose-regulated protein [Sus scrofa]	837	18	1	240462	1	1	0	554.432	1660.27	3	1658.89	1.3857	0	75.93	32	32	2.4e-06	R	IINEPTAAAIAYGLDK	R
3	gi|178056512	heat shock 70 kDa protein 1-like [Sus scrofa]	837	18	1	240247	1	0	0	830.316	1658.62	2	1658.89	-0.2708	0	109.22	32	33	1.4e-09	R	IINEPTAAAIAYGLDK	A
3	gi|178056512	heat shock 70 kDa protein 1-like [Sus scrofa]	837	18	1	240254	1	0	0	830.35	1658.69	2	1658.89	-0.2022	0	115.87	31	33	3.1e-10	R	IINEPTAAAIAYGLDK	A
3	gi|178056512	heat shock 70 kDa protein 1-like [Sus scrofa]	837	18	1	240275	1	0	0	830.466	1658.92	2	1658.89	0.0294	0	91.44	31	33	8.6e-08	R	IINEPTAAAIAYGLDK	A
3	gi|178056512	heat shock 70 kDa protein 1-like [Sus scrofa]	837	18	1	240278	1	0	0	830.485	1658.96	2	1658.89	0.0678	0	100.41	24	33	1.1e-08	R	IINEPTAAAIAYGLDK	A
3	gi|178056512	heat shock 70 kDa protein 1-like [Sus scrofa]	837	18	1	240296	1	0	0	830.574	1659.13	2	1658.89	0.2448	0	98.47	28	33	1.7e-08	R	IINEPTAAAIAYGLDK	A
3	gi|178056512	heat shock 70 kDa protein 1-like [Sus scrofa]	837	18	1	240315	1	0	0	830.627	1659.24	2	1658.89	0.3512	0	109.94	31	32	1e-09	R	IINEPTAAAIAYGLDK	A
3	gi|178056512	heat shock 70 kDa protein 1-like [Sus scrofa]	837	18	1	240323	1	0	0	830.65	1659.29	2	1658.89	0.3986	0	109.93		32	9.2e-10	R	IINEPTAAAIAYGLDK	A
3	gi|178056512	heat shock 70 kDa protein 1-like [Sus scrofa]	837	18	1	240454	1	0	0	831.128	1660.24	2	1658.89	1.353	0	93.57	31	32	4.4e-08	R	IINEPTAAAIAYGLDK	A
3	gi|178056512	heat shock 70 kDa protein 1-like [Sus scrofa]	837	18	1	240462	1	0	0	554.432	1660.27	3	1658.89	1.3857	0	75.93	32	32	2.4e-06	R	IINEPTAAAIAYGLDK	A
4	gi|311252272	PREDICTED: lithostathine-like isoform 1 [Sus scrofa]	732	19	4	69959	1	1	0	696.237	695.23	1	694.365	0.8649	0	14.04	24	34	5.2	R	NTGYLK	W
4	gi|311252272	PREDICTED: lithostathine-like isoform 1 [Sus scrofa]	732	19	4	70076	1	1	0	696.263	695.256	1	694.365	0.8911	0	15.39	20	34	3.8	R	NTGYLK	W
4	gi|311252272	PREDICTED: lithostathine-like isoform 1 [Sus scrofa]	732	19	4	183071	1	1	1	678.657	1355.3	2	1355.53	-0.231	0	13.54	24	34	5.6	K	TWMDADMACQK	R
4	gi|311252272	PREDICTED: lithostathine-like isoform 1 [Sus scrofa]	732	19	4	183108	1	1	1	678.943	1355.87	2	1355.53	0.3404	0	16.98	27	34	3	K	TWMDADMACQK	R
4	gi|311252272	PREDICTED: lithostathine-like isoform 1 [Sus scrofa]	732	19	4	187173	1	1	1	686.626	1371.24	2	1371.53	-0.2883	0	47.73	22	33	0.0018	K	TWMDADMACQK	R	Oxidation (M)	0.00000010000.0
4	gi|311252272	PREDICTED: lithostathine-like isoform 1 [Sus scrofa]	732	19	4	187194	1	1	1	686.664	1371.31	2	1371.53	-0.2119	0	14.29	23	34	4.8	K	TWMDADMACQK	R	Oxidation (M)	0.00000010000.0
4	gi|311252272	PREDICTED: lithostathine-like isoform 1 [Sus scrofa]	732	19	4	190370	1	1	1	694.477	1386.94	2	1387.52	-0.582	0	14.48	24	34	5.2	K	TWMDADMACQK	R	2 Oxidation (M)	0.00100010000.0
4	gi|311252272	PREDICTED: lithostathine-like isoform 1 [Sus scrofa]	732	19	4	248327	1	1	0	854.54	1707.07	2	1706.74	0.3228	0	50.81	27	33	0.00095	R	DYNCYVNLPYVCK	F
4	gi|311252272	PREDICTED: lithostathine-like isoform 1 [Sus scrofa]	732	19	4	248336	1	1	0	854.565	1707.12	2	1706.74	0.372	0	30.19	30	33	0.11	R	DYNCYVNLPYVCK	F
4	gi|311252272	PREDICTED: lithostathine-like isoform 1 [Sus scrofa]	732	19	4	248340	1	1	0	854.58	1707.14	2	1706.74	0.4012	0	59.03	31	33	0.00014	R	DYNCYVNLPYVCK	F
4	gi|311252272	PREDICTED: lithostathine-like isoform 1 [Sus scrofa]	732	19	4	248350	1	1	0	854.608	1707.2	2	1706.74	0.4578	0	61.19	27	33	8.1e-05	R	DYNCYVNLPYVCK	F
4	gi|311252272	PREDICTED: lithostathine-like isoform 1 [Sus scrofa]	732	19	4	248363	1	1	0	854.705	1707.39	2	1706.74	0.6514	0	54.79	31	32	0.00028	R	DYNCYVNLPYVCK	F
4	gi|311252272	PREDICTED: lithostathine-like isoform 1 [Sus scrofa]	732	19	4	248373	1	1	0	854.781	1707.55	2	1706.74	0.804	0	50.37	30	33	0.00099	R	DYNCYVNLPYVCK	F
4	gi|311252272	PREDICTED: lithostathine-like isoform 1 [Sus scrofa]	732	19	4	248384	1	1	0	854.889	1707.76	2	1706.74	1.0196	0	53.39	26	33	0.00051	R	DYNCYVNLPYVCK	F
4	gi|311252272	PREDICTED: lithostathine-like isoform 1 [Sus scrofa]	732	19	4	248389	1	1	0	854.95	1707.89	2	1706.74	1.1428	0	59.63	29	33	0.00012	R	DYNCYVNLPYVCK	F
4	gi|311252272	PREDICTED: lithostathine-like isoform 1 [Sus scrofa]	732	19	4	248405	1	1	0	855.048	1708.08	2	1706.74	1.3384	0	59.26	29	33	0.00013	R	DYNCYVNLPYVCK	F
4	gi|311252272	PREDICTED: lithostathine-like isoform 1 [Sus scrofa]	732	19	4	248407	1	1	0	855.068	1708.12	2	1706.74	1.3782	0	45.56	30	33	0.0031	R	DYNCYVNLPYVCK	F
4	gi|311252272	PREDICTED: lithostathine-like isoform 1 [Sus scrofa]	732	19	4	251692	1	1	0	866.579	1731.14	2	1731.75	-0.609	0	13.13	22	33	5.6	R	NPSTSSYPGYCGSLSR	N
4	gi|311252272	PREDICTED: lithostathine-like isoform 1 [Sus scrofa]	732	19	4	251898	1	1	0	866.716	1731.42	2	1731.75	-0.3354	0	77.73	18	32	1.5e-06	R	NPSTSSYPGYCGSLSR	N
4	gi|311252272	PREDICTED: lithostathine-like isoform 1 [Sus scrofa]	732	19	4	252098	1	1	0	867.03	1732.05	2	1731.75	0.2942	0	69.22	20	33	1.4e-05	R	NPSTSSYPGYCGSLSR	N
4	gi|311252272	PREDICTED: lithostathine-like isoform 1 [Sus scrofa]	732	19	4	252115	1	1	0	867.074	1732.13	2	1731.75	0.3806	0	63.73	22	33	4.8e-05	R	NPSTSSYPGYCGSLSR	N
4	gi|311252272	PREDICTED: lithostathine-like isoform 1 [Sus scrofa]	732	19	4	252120	1	1	0	867.08	1732.15	2	1731.75	0.3938	0	71.61	22	33	7.8e-06	R	NPSTSSYPGYCGSLSR	N
4	gi|311252272	PREDICTED: lithostathine-like isoform 1 [Sus scrofa]	732	19	4	252153	1	1	0	867.144	1732.27	2	1731.75	0.5218	0	69.2	21	32	1.1e-05	R	NPSTSSYPGYCGSLSR	N
4	gi|311252272	PREDICTED: lithostathine-like isoform 1 [Sus scrofa]	732	19	4	252169	1	1	0	867.164	1732.31	2	1731.75	0.5606	0	72.45	21	32	5e-06	R	NPSTSSYPGYCGSLSR	N
4	gi|311252272	PREDICTED: lithostathine-like isoform 1 [Sus scrofa]	732	19	4	252309	1	1	0	867.508	1733	2	1731.75	1.25	0	81.46	24	33	8.3e-07	R	NPSTSSYPGYCGSLSR	N
4	gi|311252272	PREDICTED: lithostathine-like isoform 1 [Sus scrofa]	732	19	4	252334	1	1	0	867.58	1733.14	2	1731.75	1.3922	0	75.45	20	33	3.2e-06	R	NPSTSSYPGYCGSLSR	N
4	gi|311252272	PREDICTED: lithostathine-like isoform 1 [Sus scrofa]	732	19	4	293743	1	1	0	684.269	2049.79	3	2048.92	0.863	1	31.1	22	32	0.076	K	WRDYNCYVNLPYVCK	F
4	gi|311252272	PREDICTED: lithostathine-like isoform 1 [Sus scrofa]	732	19	4	293766	1	1	0	1026.09	2050.16	2	2048.92	1.2358	1	45.97	21	32	0.0025	K	WRDYNCYVNLPYVCK	F			emPAI	1.19
5	gi|221325622	regenerating islet-derived protein 3-gamma precursor [Sus scrofa]	706	18	3	69959	1	0	0	696.237	695.23	1	694.365	0.8649	0	14.04	24	34	5.2	R	NTGYLK	W
5	gi|221325622	regenerating islet-derived protein 3-gamma precursor [Sus scrofa]	706	18	3	70076	1	0	0	696.263	695.256	1	694.365	0.8911	0	15.39	20	34	3.8	R	NTGYLK	W
5	gi|221325622	regenerating islet-derived protein 3-gamma precursor [Sus scrofa]	706	18	3	172868	1	1	1	650.17	1298.33	2	1297.53	0.8005	0	13.5	21	34	6.2	K	TWMGADMACQK	R
5	gi|221325622	regenerating islet-derived protein 3-gamma precursor [Sus scrofa]	706	18	3	248327	1	0	0	854.54	1707.07	2	1706.74	0.3228	0	50.81	27	33	0.00095	R	DYNCYVNLPYVCK	F
5	gi|221325622	regenerating islet-derived protein 3-gamma precursor [Sus scrofa]	706	18	3	248336	1	0	0	854.565	1707.12	2	1706.74	0.372	0	30.19	30	33	0.11	R	DYNCYVNLPYVCK	F
5	gi|221325622	regenerating islet-derived protein 3-gamma precursor [Sus scrofa]	706	18	3	248340	1	0	0	854.58	1707.14	2	1706.74	0.4012	0	59.03	31	33	0.00014	R	DYNCYVNLPYVCK	F
5	gi|221325622	regenerating islet-derived protein 3-gamma precursor [Sus scrofa]	706	18	3	248350	1	0	0	854.608	1707.2	2	1706.74	0.4578	0	61.19	27	33	8.1e-05	R	DYNCYVNLPYVCK	F
5	gi|221325622	regenerating islet-derived protein 3-gamma precursor [Sus scrofa]	706	18	3	248363	1	0	0	854.705	1707.39	2	1706.74	0.6514	0	54.79	31	32	0.00028	R	DYNCYVNLPYVCK	F
5	gi|221325622	regenerating islet-derived protein 3-gamma precursor [Sus scrofa]	706	18	3	248373	1	0	0	854.781	1707.55	2	1706.74	0.804	0	50.37	30	33	0.00099	R	DYNCYVNLPYVCK	F
5	gi|221325622	regenerating islet-derived protein 3-gamma precursor [Sus scrofa]	706	18	3	248384	1	0	0	854.889	1707.76	2	1706.74	1.0196	0	53.39	26	33	0.00051	R	DYNCYVNLPYVCK	F
5	gi|221325622	regenerating islet-derived protein 3-gamma precursor [Sus scrofa]	706	18	3	248389	1	0	0	854.95	1707.89	2	1706.74	1.1428	0	59.63	29	33	0.00012	R	DYNCYVNLPYVCK	F
5	gi|221325622	regenerating islet-derived protein 3-gamma precursor [Sus scrofa]	706	18	3	248405	1	0	0	855.048	1708.08	2	1706.74	1.3384	0	59.26	29	33	0.00013	R	DYNCYVNLPYVCK	F
5	gi|221325622	regenerating islet-derived protein 3-gamma precursor [Sus scrofa]	706	18	3	248407	1	0	0	855.068	1708.12	2	1706.74	1.3782	0	45.56	30	33	0.0031	R	DYNCYVNLPYVCK	F
5	gi|221325622	regenerating islet-derived protein 3-gamma precursor [Sus scrofa]	706	18	3	251692	1	0	0	866.579	1731.14	2	1731.75	-0.609	0	13.13	22	33	5.6	R	NPSTSSYPGYCGSLSR	N
5	gi|221325622	regenerating islet-derived protein 3-gamma precursor [Sus scrofa]	706	18	3	251898	1	0	0	866.716	1731.42	2	1731.75	-0.3354	0	77.73	18	32	1.5e-06	R	NPSTSSYPGYCGSLSR	N
5	gi|221325622	regenerating islet-derived protein 3-gamma precursor [Sus scrofa]	706	18	3	252098	1	0	0	867.03	1732.05	2	1731.75	0.2942	0	69.22	20	33	1.4e-05	R	NPSTSSYPGYCGSLSR	N
5	gi|221325622	regenerating islet-derived protein 3-gamma precursor [Sus scrofa]	706	18	3	252115	1	0	0	867.074	1732.13	2	1731.75	0.3806	0	63.73	22	33	4.8e-05	R	NPSTSSYPGYCGSLSR	N
5	gi|221325622	regenerating islet-derived protein 3-gamma precursor [Sus scrofa]	706	18	3	252120	1	0	0	867.08	1732.15	2	1731.75	0.3938	0	71.61	22	33	7.8e-06	R	NPSTSSYPGYCGSLSR	N
5	gi|221325622	regenerating islet-derived protein 3-gamma precursor [Sus scrofa]	706	18	3	252153	1	0	0	867.144	1732.27	2	1731.75	0.5218	0	69.2	21	32	1.1e-05	R	NPSTSSYPGYCGSLSR	N
5	gi|221325622	regenerating islet-derived protein 3-gamma precursor [Sus scrofa]	706	18	3	252169	1	0	0	867.164	1732.31	2	1731.75	0.5606	0	72.45	21	32	5e-06	R	NPSTSSYPGYCGSLSR	N
5	gi|221325622	regenerating islet-derived protein 3-gamma precursor [Sus scrofa]	706	18	3	252309	1	0	0	867.508	1733	2	1731.75	1.25	0	81.46	24	33	8.3e-07	R	NPSTSSYPGYCGSLSR	N
5	gi|221325622	regenerating islet-derived protein 3-gamma precursor [Sus scrofa]	706	18	3	252334	1	0	0	867.58	1733.14	2	1731.75	1.3922	0	75.45	20	33	3.2e-06	R	NPSTSSYPGYCGSLSR	N
5	gi|221325622	regenerating islet-derived protein 3-gamma precursor [Sus scrofa]	706	18	3	293743	1	0	0	684.269	2049.79	3	2048.92	0.863	1	31.1	22	32	0.076	K	WRDYNCYVNLPYVCK	F
5	gi|221325622	regenerating islet-derived protein 3-gamma precursor [Sus scrofa]	706	18	3	293766	1	0	0	1026.09	2050.16	2	2048.92	1.2358	1	45.97	21	32	0.0025	K	WRDYNCYVNLPYVCK	F			emPAI	0.88
6	gi|335309396	PREDICTED: adenylate kinase 2, mitochondrial-like isoform 1 [Sus scrofa]	615	18	1	140202	1	1	1	568.411	1134.81	2	1134.58	0.2248	0	64.92	27	35	5.5e-05	K	NGFLLDGFPR	T
6	gi|335309396	PREDICTED: adenylate kinase 2, mitochondrial-like isoform 1 [Sus scrofa]	615	18	1	140220	1	1	1	568.464	1134.91	2	1134.58	0.3316	0	63.45	28	35	7.5e-05	K	NGFLLDGFPR	T
6	gi|335309396	PREDICTED: adenylate kinase 2, mitochondrial-like isoform 1 [Sus scrofa]	615	18	1	140231	1	1	1	568.499	1134.98	2	1134.58	0.4014	0	67.91	30	34	2.3e-05	K	NGFLLDGFPR	T
6	gi|335309396	PREDICTED: adenylate kinase 2, mitochondrial-like isoform 1 [Sus scrofa]	615	18	1	140240	1	1	1	568.527	1135.04	2	1134.58	0.4562	0	68.69	27	33	1.7e-05	K	NGFLLDGFPR	T
6	gi|335309396	PREDICTED: adenylate kinase 2, mitochondrial-like isoform 1 [Sus scrofa]	615	18	1	140256	1	1	1	568.574	1135.13	2	1134.58	0.5516	0	66.06	29	34	3.2e-05	K	NGFLLDGFPR	T
6	gi|335309396	PREDICTED: adenylate kinase 2, mitochondrial-like isoform 1 [Sus scrofa]	615	18	1	140283	1	1	1	568.626	1135.24	2	1134.58	0.6544	0	65.94	26	35	4.1e-05	K	NGFLLDGFPR	T
6	gi|335309396	PREDICTED: adenylate kinase 2, mitochondrial-like isoform 1 [Sus scrofa]	615	18	1	140302	1	1	1	568.659	1135.3	2	1134.58	0.7214	0	64.83	30	35	5.5e-05	K	NGFLLDGFPR	T
6	gi|335309396	PREDICTED: adenylate kinase 2, mitochondrial-like isoform 1 [Sus scrofa]	615	18	1	140307	1	1	1	568.683	1135.35	2	1134.58	0.7696	0	65.2	27	35	5.1e-05	K	NGFLLDGFPR	T			emPAI	0.28
7	gi|350583977	PREDICTED: keratin, type II cytoskeletal 1 [Sus scrofa]	596	16	3	71363	4	1	1	352.137	702.26	2	702.352	-0.0925	1	14.23	32	37	9.6	R	RSGGGGGR	F
7	gi|350583977	PREDICTED: keratin, type II cytoskeletal 1 [Sus scrofa]	596	16	3	109368	1	1	1	487.149	972.284	2	972.524	-0.2395	0	20.15	30	36	2	K	IEISELNR	V
7	gi|350583977	PREDICTED: keratin, type II cytoskeletal 1 [Sus scrofa]	596	16	3	121305	1	1	1	517.53	1033.05	2	1032.51	0.5371	0	22.71	25	33	0.67	R	TLLEGEESR	M
7	gi|350583977	PREDICTED: keratin, type II cytoskeletal 1 [Sus scrofa]	596	16	3	121309	2	1	1	517.54	1033.07	2	1032.51	0.5565	0	17.9	28	34	2.1	R	TLLEGEESR	M
7	gi|350583977	PREDICTED: keratin, type II cytoskeletal 1 [Sus scrofa]	596	16	3	121319	2	1	1	517.585	1033.15	2	1032.51	0.6461	0	19.4	33	35	1.9	R	TLLEGEESR	M
7	gi|350583977	PREDICTED: keratin, type II cytoskeletal 1 [Sus scrofa]	596	16	3	189714	1	1	1	692.192	1382.37	2	1382.68	-0.3146	0	73.15	29	34	6.5e-06	K	SLNNQFASFIDK	V
7	gi|350583977	PREDICTED: keratin, type II cytoskeletal 1 [Sus scrofa]	596	16	3	189719	1	1	1	692.215	1382.41	2	1382.68	-0.2686	0	73.21	29	34	6.7e-06	K	SLNNQFASFIDK	V
7	gi|350583977	PREDICTED: keratin, type II cytoskeletal 1 [Sus scrofa]	596	16	3	189720	1	1	1	692.229	1382.44	2	1382.68	-0.2388	0	73.19	29	34	6.8e-06	K	SLNNQFASFIDK	V
7	gi|350583977	PREDICTED: keratin, type II cytoskeletal 1 [Sus scrofa]	596	16	3	189746	1	1	1	692.508	1383	2	1382.68	0.3174	0	53.65	23	34	0.0006	K	SLNNQFASFIDK	V
7	gi|350583977	PREDICTED: keratin, type II cytoskeletal 1 [Sus scrofa]	596	16	3	189750	1	1	1	692.516	1383.02	2	1382.68	0.3348	0	56.46	28	34	0.00031	K	SLNNQFASFIDK	V
7	gi|350583977	PREDICTED: keratin, type II cytoskeletal 1 [Sus scrofa]	596	16	3	189759	1	1	1	692.571	1383.13	2	1382.68	0.4444	0	66.39	30	33	2.5e-05	K	SLNNQFASFIDK	V
7	gi|350583977	PREDICTED: keratin, type II cytoskeletal 1 [Sus scrofa]	596	16	3	207483	2	1	0	738.357	1474.7	2	1474.78	-0.0785	0	59.12		34	0.00016	R	FLEQQNQVLQTK	W
7	gi|350583977	PREDICTED: keratin, type II cytoskeletal 1 [Sus scrofa]	596	16	3	207549	1	1	0	738.577	1475.14	2	1474.78	0.3609	0	63		33	5.7e-05	R	FLEQQNQVLQTK	W
7	gi|350583977	PREDICTED: keratin, type II cytoskeletal 1 [Sus scrofa]	596	16	3	207550	1	1	0	738.577	1475.14	2	1474.78	0.3613	0	63.13		33	5.6e-05	R	FLEQQNQVLQTK	W
7	gi|350583977	PREDICTED: keratin, type II cytoskeletal 1 [Sus scrofa]	596	16	3	207640	1	1	0	738.915	1475.81	2	1474.78	1.0367	0	15.4	25	34	4	R	FLEQQNQVLQTK	W
7	gi|350583977	PREDICTED: keratin, type II cytoskeletal 1 [Sus scrofa]	596	16	3	207694	1	1	0	739.077	1476.14	2	1474.78	1.3617	0	60.08		33	0.00012	R	FLEQQNQVLQTK	W
7	gi|350583977	PREDICTED: keratin, type II cytoskeletal 1 [Sus scrofa]	596	16	3	215899	1	1	1	763.002	1523.99	2	1522.78	1.2085	1	19.51	24	34	1.5	R	LLRDYQELMNTK	L
7	gi|350583977	PREDICTED: keratin, type II cytoskeletal 1 [Sus scrofa]	596	16	3	236039	1	1	1	546.896	1637.67	3	1637.85	-0.1858	1	38.53	28	33	0.017	K	SLNNQFASFIDKVR	F
7	gi|350583977	PREDICTED: keratin, type II cytoskeletal 1 [Sus scrofa]	596	16	3	236091	1	1	1	820.118	1638.22	2	1637.85	0.3689	1	64.54	24	32	3.5e-05	K	SLNNQFASFIDKVR	F
7	gi|350583977	PREDICTED: keratin, type II cytoskeletal 1 [Sus scrofa]	596	16	3	236100	1	1	1	820.143	1638.27	2	1637.85	0.4197	1	68.59	23	32	1.2e-05	K	SLNNQFASFIDKVR	F
7	gi|350583977	PREDICTED: keratin, type II cytoskeletal 1 [Sus scrofa]	596	16	3	236101	1	1	1	820.144	1638.27	2	1637.85	0.4215	1	66.59	23	32	2e-05	K	SLNNQFASFIDKVR	F
7	gi|350583977	PREDICTED: keratin, type II cytoskeletal 1 [Sus scrofa]	596	16	3	236107	1	1	1	820.157	1638.3	2	1637.85	0.4471	1	63.74	20	32	3.7e-05	K	SLNNQFASFIDKVR	F
7	gi|350583977	PREDICTED: keratin, type II cytoskeletal 1 [Sus scrofa]	596	16	3	236130	1	1	1	820.254	1638.49	2	1637.85	0.6417	1	59.37	26	33	0.00013	K	SLNNQFASFIDKVR	F
7	gi|350583977	PREDICTED: keratin, type II cytoskeletal 1 [Sus scrofa]	596	16	3	236182	1	1	1	547.287	1638.84	3	1637.85	0.9854	1	29.35	24	33	0.14	K	SLNNQFASFIDKVR	F
7	gi|350583977	PREDICTED: keratin, type II cytoskeletal 1 [Sus scrofa]	596	16	3	236200	1	1	1	547.328	1638.96	3	1637.85	1.109	1	15.43	17	33	3.5	K	SLNNQFASFIDKVR	F
7	gi|350583977	PREDICTED: keratin, type II cytoskeletal 1 [Sus scrofa]	596	16	3	236211	1	1	1	547.344	1639.01	3	1637.85	1.1588	1	32.8	28	33	0.064	K	SLNNQFASFIDKVR	F
7	gi|350583977	PREDICTED: keratin, type II cytoskeletal 1 [Sus scrofa]	596	16	3	236249	1	1	1	547.397	1639.17	3	1637.85	1.3163	1	17.17	21	33	2.2	K	SLNNQFASFIDKVR	F			emPAI	0.22
8	gi|350583970	PREDICTED: keratin, type II cytoskeletal 75-like [Sus scrofa]	451	16	3	75157	8	1	1	359.349	716.684	2	715.386	1.2974	0	18.06	32	36	3.9	R	LDAELR	N
8	gi|350583970	PREDICTED: keratin, type II cytoskeletal 75-like [Sus scrofa]	451	16	3	129253	1	1	0	541.385	1080.76	2	1081.59	-0.8358	1	35.52	27	34	0.043	K	FASFIDKVR	F
8	gi|350583970	PREDICTED: keratin, type II cytoskeletal 75-like [Sus scrofa]	451	16	3	129267	1	1	0	541.406	1080.8	2	1081.59	-0.795	1	38.41	30	34	0.022	K	FASFIDKVR	F
8	gi|350583970	PREDICTED: keratin, type II cytoskeletal 75-like [Sus scrofa]	451	16	3	130387	3	1	0	363.379	1087.11	3	1086.6	0.5107	1	17.76	31	34	2.2	R	EQIKTLNNK	F
8	gi|350583970	PREDICTED: keratin, type II cytoskeletal 75-like [Sus scrofa]	451	16	3	130412	8	1	0	363.408	1087.2	3	1086.6	0.5992	1	14.77	34	35	5.7	R	EQIKTLNNK	F
8	gi|350583970	PREDICTED: keratin, type II cytoskeletal 75-like [Sus scrofa]	451	16	3	146351	2	1	0	585.972	1169.93	2	1169.54	0.3902	1	13.38	27	34	6.9	K	KDVDAAYMNK	M	Oxidation (M)	0.0000000100.0
8	gi|350583970	PREDICTED: keratin, type II cytoskeletal 75-like [Sus scrofa]	451	16	3	173553	1	1	1	651.791	1301.57	2	1301.71	-0.1412	0	100.64	34	34	1.3e-08	R	SLDLDSIIAEVK	A
8	gi|350583970	PREDICTED: keratin, type II cytoskeletal 75-like [Sus scrofa]	451	16	3	173563	1	1	1	651.856	1301.7	2	1301.71	-0.0094	0	17.7	19	34	2.5	R	SLDLDSIIAEVK	A
8	gi|350583970	PREDICTED: keratin, type II cytoskeletal 75-like [Sus scrofa]	451	16	3	173609	1	1	1	652.065	1302.12	2	1301.71	0.4074	0	73.9	27	33	4.5e-06	R	SLDLDSIIAEVK	A
8	gi|350583970	PREDICTED: keratin, type II cytoskeletal 75-like [Sus scrofa]	451	16	3	173617	1	1	1	652.092	1302.17	2	1301.71	0.461	0	88.81	29	33	1.4e-07	R	SLDLDSIIAEVK	A
8	gi|350583970	PREDICTED: keratin, type II cytoskeletal 75-like [Sus scrofa]	451	16	3	173627	1	1	1	652.115	1302.21	2	1301.71	0.507	0	70.63	32	33	9.7e-06	R	SLDLDSIIAEVK	A
8	gi|350583970	PREDICTED: keratin, type II cytoskeletal 75-like [Sus scrofa]	451	16	3	173637	1	1	1	652.156	1302.3	2	1301.71	0.5902	0	31.14	22	34	0.11	R	SLDLDSIIAEVK	A
8	gi|350583970	PREDICTED: keratin, type II cytoskeletal 75-like [Sus scrofa]	451	16	3	173658	1	1	1	652.223	1302.43	2	1301.71	0.7238	0	63.63	27	34	6.6e-05	R	SLDLDSIIAEVK	A
8	gi|350583970	PREDICTED: keratin, type II cytoskeletal 75-like [Sus scrofa]	451	16	3	173677	1	1	1	1303.5	1302.49	1	1301.71	0.7869	0	32.4	23	34	0.088	R	SLDLDSIIAEVK	A
8	gi|350583970	PREDICTED: keratin, type II cytoskeletal 75-like [Sus scrofa]	451	16	3	173686	1	1	1	652.273	1302.53	2	1301.71	0.8234	0	15.96	26	34	3.9	R	SLDLDSIIAEVK	A
8	gi|350583970	PREDICTED: keratin, type II cytoskeletal 75-like [Sus scrofa]	451	16	3	173693	1	1	1	652.292	1302.57	2	1301.71	0.861	0	22.16	27	34	0.93	R	SLDLDSIIAEVK	A
8	gi|350583970	PREDICTED: keratin, type II cytoskeletal 75-like [Sus scrofa]	451	16	3	173708	1	1	1	652.344	1302.67	2	1301.71	0.9664	0	18.39	27	34	2.2	R	SLDLDSIIAEVK	A
8	gi|350583970	PREDICTED: keratin, type II cytoskeletal 75-like [Sus scrofa]	451	16	3	173709	1	1	1	652.35	1302.69	2	1301.71	0.9778	0	73.31	29	34	7.1e-06	R	SLDLDSIIAEVK	A
8	gi|350583970	PREDICTED: keratin, type II cytoskeletal 75-like [Sus scrofa]	451	16	3	173710	1	1	1	652.354	1302.69	2	1301.71	0.9864	0	51.2		34	0.0012	R	SLDLDSIIAEVK	A
8	gi|350583970	PREDICTED: keratin, type II cytoskeletal 75-like [Sus scrofa]	451	16	3	173731	1	1	1	652.408	1302.8	2	1301.71	1.093	0	56.11	33	34	0.00037	R	SLDLDSIIAEVK	A
8	gi|350583970	PREDICTED: keratin, type II cytoskeletal 75-like [Sus scrofa]	451	16	3	173736	1	1	1	652.414	1302.81	2	1301.71	1.1064	0	34.29	30	34	0.057	R	SLDLDSIIAEVK	A
8	gi|350583970	PREDICTED: keratin, type II cytoskeletal 75-like [Sus scrofa]	451	16	3	173761	1	1	1	652.47	1302.93	2	1301.71	1.2182	0	35.71	25	34	0.041	R	SLDLDSIIAEVK	A
8	gi|350583970	PREDICTED: keratin, type II cytoskeletal 75-like [Sus scrofa]	451	16	3	207483	4	0	0	738.357	1474.7	2	1475.8	-1.0989	1	36.74		34	0.028	R	FLEQQNKVLETK	W
8	gi|350583970	PREDICTED: keratin, type II cytoskeletal 75-like [Sus scrofa]	451	16	3	207549	3	0	0	738.577	1475.14	2	1475.8	-0.6595	1	42.91		33	0.0058	R	FLEQQNKVLETK	W
8	gi|350583970	PREDICTED: keratin, type II cytoskeletal 75-like [Sus scrofa]	451	16	3	207550	3	0	0	738.577	1475.14	2	1475.8	-0.6591	1	44.44		33	0.0041	R	FLEQQNKVLETK	W
8	gi|350583970	PREDICTED: keratin, type II cytoskeletal 75-like [Sus scrofa]	451	16	3	207694	3	0	0	739.077	1476.14	2	1475.8	0.3413	1	46.41		33	0.0027	R	FLEQQNKVLETK	W
8	gi|350583970	PREDICTED: keratin, type II cytoskeletal 75-like [Sus scrofa]	451	16	3	207812	1	1	0	739.37	1476.73	2	1475.8	0.9273	1	13.29	22	34	6.5	R	FLEQQNKVLETK	W			emPAI	0.24
9	gi|350580796	PREDICTED: hypothetical protein LOC100522363 [Sus scrofa]	384	11	5	51098	1	1	1	559.262	558.254	1	557.292	0.9622	0	13.2	23	37	14	R	ASGAPR	A
9	gi|350580796	PREDICTED: hypothetical protein LOC100522363 [Sus scrofa]	384	11	5	57064	7	1	0	303.183	604.351	2	604.37	-0.019	0	14.64	32	37	9.2	R	VALFR	N
9	gi|350580796	PREDICTED: hypothetical protein LOC100522363 [Sus scrofa]	384	11	5	57081	4	1	0	303.338	604.662	2	604.37	0.292	0	16.94	33	37	5.3	R	VALFR	N
9	gi|350580796	PREDICTED: hypothetical protein LOC100522363 [Sus scrofa]	384	11	5	86802	2	1	1	400.84	799.666	2	800.382	-0.7161	0	15.23	29	35	5.8	R	SSGFFTR	V
9	gi|350580796	PREDICTED: hypothetical protein LOC100522363 [Sus scrofa]	384	11	5	110118	3	1	1	326.889	977.645	3	977.416	0.2286	0	18.99	33	35	2.3	R	SGGGSGGGSAER	T
9	gi|350580796	PREDICTED: hypothetical protein LOC100522363 [Sus scrofa]	384	11	5	140167	1	1	1	568.273	1134.53	2	1135.53	-0.9945	0	39.83	30	35	0.018	R	SISQNGYDPR	Q
9	gi|350580796	PREDICTED: hypothetical protein LOC100522363 [Sus scrofa]	384	11	5	140274	1	1	1	568.607	1135.2	2	1135.53	-0.3271	0	36.71	27	34	0.032	R	SISQNGYDPR	Q
9	gi|350580796	PREDICTED: hypothetical protein LOC100522363 [Sus scrofa]	384	11	5	146656	1	1	1	586.938	1171.86	2	1170.59	1.2749	0	42.75	26	35	0.0088	R	FVLTAASCFR	G
9	gi|350580796	PREDICTED: hypothetical protein LOC100522363 [Sus scrofa]	384	11	5	213190	1	1	1	755.338	1508.66	2	1507.76	0.8984	0	32.63	23	34	0.073	K	NSGSASVVLGAYDLR	Q
9	gi|350580796	PREDICTED: hypothetical protein LOC100522363 [Sus scrofa]	384	11	5	221827	1	1	1	778.027	1554.04	2	1552.86	1.1828	0	74.86	27	34	4.2e-06	R	QNLNDVLLLQLDR	E
9	gi|350580796	PREDICTED: hypothetical protein LOC100522363 [Sus scrofa]	384	11	5	256435	1	1	1	880.632	1759.25	2	1758.94	0.307	1	57.12	24	32	0.00019	R	RAQPQEFPFLASIQK	Q
9	gi|350580796	PREDICTED: hypothetical protein LOC100522363 [Sus scrofa]	384	11	5	270655	1	1	1	930.305	1858.6	2	1858.97	-0.3771	0	75.01	23	33	3.2e-06	R	GTPLVCNGLAQGVASFLR	R
9	gi|350580796	PREDICTED: hypothetical protein LOC100522363 [Sus scrofa]	384	11	5	270803	1	1	1	930.677	1859.34	2	1858.97	0.3667	0	73.88	25	32	3.5e-06	R	GTPLVCNGLAQGVASFLR	R
9	gi|350580796	PREDICTED: hypothetical protein LOC100522363 [Sus scrofa]	384	11	5	270808	1	1	1	930.689	1859.36	2	1858.97	0.3905	0	43.67		32	0.0036	R	GTPLVCNGLAQGVASFLR	R
9	gi|350580796	PREDICTED: hypothetical protein LOC100522363 [Sus scrofa]	384	11	5	270813	1	1	1	620.811	1859.41	3	1858.97	0.44	0	40.44	26	31	0.0071	R	GTPLVCNGLAQGVASFLR	R
9	gi|350580796	PREDICTED: hypothetical protein LOC100522363 [Sus scrofa]	384	11	5	270871	1	1	1	931.055	1860.09	2	1858.97	1.1223	0	74.81	23	33	3.5e-06	R	GTPLVCNGLAQGVASFLR	R
9	gi|350580796	PREDICTED: hypothetical protein LOC100522363 [Sus scrofa]	384	11	5	270905	1	1	1	931.17	1860.33	2	1858.97	1.3539	0	74.33	22	32	3.2e-06	R	GTPLVCNGLAQGVASFLR	R			emPAI	0.45
10	gi|350583957	PREDICTED: keratin, type II cuticular Hb4 [Sus scrofa]	334	11	6	53511	5	1	0	572.528	571.52	1	572.339	-0.8189	1	17.93	33	36	3.7	K	AQRAK	L
10	gi|350583957	PREDICTED: keratin, type II cuticular Hb4 [Sus scrofa]	334	11	6	53524	2	1	0	572.596	571.589	1	572.339	-0.7504	1	18.02	32	36	3.7	K	AQRAK	L
10	gi|350583957	PREDICTED: keratin, type II cuticular Hb4 [Sus scrofa]	334	11	6	53549	2	1	0	573.165	572.158	1	572.339	-0.1819	1	15.18	29	37	9.4	K	AQRAK	L
10	gi|350583957	PREDICTED: keratin, type II cuticular Hb4 [Sus scrofa]	334	11	6	78883	1	1	1	375.573	749.131	2	749.382	-0.2506	0	16.84	27	36	4.2	R	GLGGFGSR	S
10	gi|350583957	PREDICTED: keratin, type II cuticular Hb4 [Sus scrofa]	334	11	6	109605	1	1	0	488.371	974.727	2	974.406	0.3212	1	14.12	20	36	7.8	-	MSCRSYR	V	Oxidation (M)	0.1000000.0
10	gi|350583957	PREDICTED: keratin, type II cuticular Hb4 [Sus scrofa]	334	11	6	115325	1	1	1	504.827	1007.64	2	1007.49	0.1481	0	44.24	33	35	0.0062	K	DVDSAFLNK	S
10	gi|350583957	PREDICTED: keratin, type II cuticular Hb4 [Sus scrofa]	334	11	6	115359	1	1	1	504.976	1007.94	2	1007.49	0.4449	0	50.81	28	34	0.001	K	DVDSAFLNK	S
10	gi|350583957	PREDICTED: keratin, type II cuticular Hb4 [Sus scrofa]	334	11	6	124064	1	1	1	350.834	1049.48	3	1048.65	0.8284	0	15.79	28	35	4.4	R	IAAVGPRPIR	C
10	gi|350583957	PREDICTED: keratin, type II cuticular Hb4 [Sus scrofa]	334	11	6	129253	1	0	0	541.385	1080.76	2	1081.59	-0.8358	1	35.52	27	34	0.043	K	FASFIDKVR	F
10	gi|350583957	PREDICTED: keratin, type II cuticular Hb4 [Sus scrofa]	334	11	6	129267	1	0	0	541.406	1080.8	2	1081.59	-0.795	1	38.41	30	34	0.022	K	FASFIDKVR	F
10	gi|350583957	PREDICTED: keratin, type II cuticular Hb4 [Sus scrofa]	334	11	6	130387	3	0	0	363.379	1087.11	3	1086.6	0.5107	1	17.76	31	34	2.2	K	EQIKTLNNK	F
10	gi|350583957	PREDICTED: keratin, type II cuticular Hb4 [Sus scrofa]	334	11	6	130412	8	0	0	363.408	1087.2	3	1086.6	0.5992	1	14.77	34	35	5.7	K	EQIKTLNNK	F
10	gi|350583957	PREDICTED: keratin, type II cuticular Hb4 [Sus scrofa]	334	11	6	169596	1	1	1	643.373	1284.73	2	1284.69	0.0383	0	16.46	20	34	3.2	R	DLNVDGIIADIK	A
10	gi|350583957	PREDICTED: keratin, type II cuticular Hb4 [Sus scrofa]	334	11	6	169700	1	1	1	643.438	1284.86	2	1284.69	0.1687	0	54.81	32	34	0.00047	R	DLNVDGIIADIK	A
10	gi|350583957	PREDICTED: keratin, type II cuticular Hb4 [Sus scrofa]	334	11	6	169971	1	1	1	644.043	1286.07	2	1284.69	1.3787	0	70.52		33	1.1e-05	R	DLNVDGIIADIK	A
10	gi|350583957	PREDICTED: keratin, type II cuticular Hb4 [Sus scrofa]	334	11	6	188949	1	1	1	460.676	1379.01	3	1378.7	0.3068	1	13.35	22	34	6.7	K	WSFLQEQKGTR	S
10	gi|350583957	PREDICTED: keratin, type II cuticular Hb4 [Sus scrofa]	334	11	6	251599	1	1	1	866.261	1730.51	2	1730.86	-0.3547	0	34.36	22	33	0.039	R	GGVVCGPDALVTSSGLSR	G
10	gi|350583957	PREDICTED: keratin, type II cuticular Hb4 [Sus scrofa]	334	11	6	265846	1	1	1	912.029	1822.04	2	1821.93	0.117	0	66.82	25	33	2.5e-05	R	SNLEPLFENYITNLR	H
10	gi|350583957	PREDICTED: keratin, type II cuticular Hb4 [Sus scrofa]	334	11	6	265899	1	1	1	912.152	1822.29	2	1821.93	0.3624	0	28.52	18	33	0.14	R	SNLEPLFENYITNLR	H
10	gi|350583957	PREDICTED: keratin, type II cuticular Hb4 [Sus scrofa]	334	11	6	266020	1	1	1	912.57	1823.13	2	1821.93	1.1996	0	55.37	25	33	0.00035	R	SNLEPLFENYITNLR	H
10	gi|350583957	PREDICTED: keratin, type II cuticular Hb4 [Sus scrofa]	334	11	6	296432	1	1	1	1035.87	2069.72	2	2069.95	-0.2269	0	63.89	24	32	3.8e-05	K	SDMEANVDSLTQEIDFLK	T	Oxidation (M)	0.001000000000000000.0
10	gi|350583957	PREDICTED: keratin, type II cuticular Hb4 [Sus scrofa]	334	11	6	296498	1	1	1	1036.14	2070.28	2	2069.95	0.3291	0	86.69	26	32	2.1e-07	K	SDMEANVDSLTQEIDFLK	T	Oxidation (M)	0.001000000000000000.0	emPAI	0.35
11	gi|114703738	deleted in malignant brain tumors 1 protein precursor [Sus scrofa]	299	8	3	76573	1	1	1	365.296	728.577	2	729.377	-0.7995	0	24.46	28	36	0.77	R	LVNGGDR	C
11	gi|114703738	deleted in malignant brain tumors 1 protein precursor [Sus scrofa]	299	8	3	119794	1	1	1	512.648	1023.28	2	1022.54	0.7414	0	40.59	29	34	0.014	R	FISDVSVTR	A
11	gi|114703738	deleted in malignant brain tumors 1 protein precursor [Sus scrofa]	299	8	3	195702	2	1	1	472.333	1413.98	3	1413.65	0.3267	1	13.29	27	34	6.5	K	MVVCRAFDSSSR	C
11	gi|114703738	deleted in malignant brain tumors 1 protein precursor [Sus scrofa]	299	8	3	195710	1	1	1	472.341	1414	3	1413.65	0.3525	1	15.69	22	34	3.7	K	MVVCRAFDSSSR	C
11	gi|114703738	deleted in malignant brain tumors 1 protein precursor [Sus scrofa]	299	8	3	195717	1	1	1	472.346	1414.02	3	1413.65	0.3663	1	15.44	27	34	3.9	K	MVVCRAFDSSSR	C
11	gi|114703738	deleted in malignant brain tumors 1 protein precursor [Sus scrofa]	299	8	3	209464	1	1	1	744.235	1486.46	2	1486.78	-0.3226	0	40.15	22	34	0.013	R	FGQGSGPILLDDLR	C
11	gi|114703738	deleted in malignant brain tumors 1 protein precursor [Sus scrofa]	299	8	3	209548	1	1	1	744.556	1487.1	2	1486.78	0.32	0	81.17	32	34	9.8e-07	R	FGQGSGPILLDDLR	C
11	gi|114703738	deleted in malignant brain tumors 1 protein precursor [Sus scrofa]	299	8	3	209555	1	1	1	744.584	1487.15	2	1486.78	0.3754	0	66.07	31	33	2.9e-05	R	FGQGSGPILLDDLR	C
11	gi|114703738	deleted in malignant brain tumors 1 protein precursor [Sus scrofa]	299	8	3	209557	1	1	1	744.6	1487.19	2	1486.78	0.4078	0	83.85		33	4.4e-07	R	FGQGSGPILLDDLR	C
11	gi|114703738	deleted in malignant brain tumors 1 protein precursor [Sus scrofa]	299	8	3	209566	1	1	1	744.615	1487.21	2	1486.78	0.4366	0	79.19	31	33	1.2e-06	R	FGQGSGPILLDDLR	C
11	gi|114703738	deleted in malignant brain tumors 1 protein precursor [Sus scrofa]	299	8	3	209623	1	1	1	744.777	1487.54	2	1486.78	0.7616	0	24.54	19	34	0.48	R	FGQGSGPILLDDLR	C
11	gi|114703738	deleted in malignant brain tumors 1 protein precursor [Sus scrofa]	299	8	3	209707	1	1	1	745.061	1488.11	2	1486.78	1.3288	0	63.41		33	5.7e-05	R	FGQGSGPILLDDLR	C
11	gi|114703738	deleted in malignant brain tumors 1 protein precursor [Sus scrofa]	299	8	3	209710	1	1	1	745.063	1488.11	2	1486.78	1.3326	0	30.31	22	33	0.12	R	FGQGSGPILLDDLR	C
11	gi|114703738	deleted in malignant brain tumors 1 protein precursor [Sus scrofa]	299	8	3	214793	1	1	1	759.099	1516.18	2	1515.73	0.4582	0	36.81	23	33	0.023	R	QLGCGWAVSAPGSAR	F			emPAI	0.07
12	gi|47523278	resistin precursor [Sus scrofa]	288	7	2	183889	1	1	1	679.491	1356.97	2	1356.78	0.1917	0	55.91	27	34	0.00038	R	DVASFLIPQVIR	N
12	gi|47523278	resistin precursor [Sus scrofa]	288	7	2	183915	1	1	1	679.526	1357.04	2	1356.78	0.2617	0	76.22		34	3.3e-06	R	DVASFLIPQVIR	N
12	gi|47523278	resistin precursor [Sus scrofa]	288	7	2	183954	1	1	1	679.574	1357.13	2	1356.78	0.3573	0	78.29	28	33	1.7e-06	R	DVASFLIPQVIR	N
12	gi|47523278	resistin precursor [Sus scrofa]	288	7	2	184005	1	1	1	679.691	1357.37	2	1356.78	0.5913	0	68.34	27	34	2.2e-05	R	DVASFLIPQVIR	N
12	gi|47523278	resistin precursor [Sus scrofa]	288	7	2	184009	1	1	1	679.702	1357.39	2	1356.78	0.6127	0	62.65	25	34	8.1e-05	R	DVASFLIPQVIR	N
12	gi|47523278	resistin precursor [Sus scrofa]	288	7	2	184014	1	1	1	679.736	1357.46	2	1356.78	0.6819	0	58.69	24	34	0.00021	R	DVASFLIPQVIR	N
12	gi|47523278	resistin precursor [Sus scrofa]	288	7	2	188034	1	1	1	687.954	1373.89	2	1373.65	0.2442	0	52.14	27	34	0.00089	K	SLCPVDEAINEK	I			emPAI	0.63
13	gi|329744642	glyceraldehyde-3-phosphate dehydrogenase [Sus scrofa]	285	30	2	85980	1	1	0	795.228	794.221	1	794.411	-0.1901	0	22.86	28	34	0.81	K	LTGMAFR	V
13	gi|329744642	glyceraldehyde-3-phosphate dehydrogenase [Sus scrofa]	285	30	2	85985	1	1	0	795.307	794.3	1	794.411	-0.1109	0	21.97	26	34	1	K	LTGMAFR	V
13	gi|329744642	glyceraldehyde-3-phosphate dehydrogenase [Sus scrofa]	285	30	2	85987	1	1	0	795.333	794.326	1	794.411	-0.0854	0	26	30	34	0.39	K	LTGMAFR	V
13	gi|329744642	glyceraldehyde-3-phosphate dehydrogenase [Sus scrofa]	285	30	2	85989	1	1	0	795.334	794.327	1	794.411	-0.084	0	19.33	24	34	1.8	K	LTGMAFR	V
13	gi|329744642	glyceraldehyde-3-phosphate dehydrogenase [Sus scrofa]	285	30	2	85990	1	1	0	795.336	794.329	1	794.411	-0.0821	0	21.94	22	34	1	K	LTGMAFR	V
13	gi|329744642	glyceraldehyde-3-phosphate dehydrogenase [Sus scrofa]	285	30	2	85991	1	1	0	795.352	794.345	1	794.411	-0.0664	0	18.08	25	34	2.4	K	LTGMAFR	V
13	gi|329744642	glyceraldehyde-3-phosphate dehydrogenase [Sus scrofa]	285	30	2	85993	1	1	0	398.189	794.364	2	794.411	-0.0472	0	38.04	29	34	0.025	K	LTGMAFR	V
13	gi|329744642	glyceraldehyde-3-phosphate dehydrogenase [Sus scrofa]	285	30	2	85995	1	1	0	795.376	794.369	1	794.411	-0.0423	0	22.28	25	34	0.93	K	LTGMAFR	V
13	gi|329744642	glyceraldehyde-3-phosphate dehydrogenase [Sus scrofa]	285	30	2	85996	1	1	0	795.386	794.379	1	794.411	-0.032	0	24.17	27	34	0.6	K	LTGMAFR	V
13	gi|329744642	glyceraldehyde-3-phosphate dehydrogenase [Sus scrofa]	285	30	2	85997	1	1	0	795.401	794.393	1	794.411	-0.0176	0	19.11	26	34	1.9	K	LTGMAFR	V
13	gi|329744642	glyceraldehyde-3-phosphate dehydrogenase [Sus scrofa]	285	30	2	86003	1	1	0	398.22	794.425	2	794.411	0.0146	0	34.5	30	34	0.056	K	LTGMAFR	V
13	gi|329744642	glyceraldehyde-3-phosphate dehydrogenase [Sus scrofa]	285	30	2	86004	1	1	0	398.222	794.43	2	794.411	0.0192	0	31.1	25	34	0.12	K	LTGMAFR	V
13	gi|329744642	glyceraldehyde-3-phosphate dehydrogenase [Sus scrofa]	285	30	2	86012	1	1	0	398.245	794.476	2	794.411	0.0648	0	28.8	24	34	0.21	K	LTGMAFR	V
13	gi|329744642	glyceraldehyde-3-phosphate dehydrogenase [Sus scrofa]	285	30	2	86018	1	1	0	398.284	794.553	2	794.411	0.1422	0	40.71	32	34	0.013	K	LTGMAFR	V
13	gi|329744642	glyceraldehyde-3-phosphate dehydrogenase [Sus scrofa]	285	30	2	86024	1	1	0	398.324	794.634	2	794.411	0.223	0	39.59	30	34	0.017	K	LTGMAFR	V
13	gi|329744642	glyceraldehyde-3-phosphate dehydrogenase [Sus scrofa]	285	30	2	86030	1	1	0	398.356	794.697	2	794.411	0.286	0	24.81	30	34	0.52	K	LTGMAFR	V
13	gi|329744642	glyceraldehyde-3-phosphate dehydrogenase [Sus scrofa]	285	30	2	86033	1	1	0	398.384	794.753	2	794.411	0.3422	0	35.41	26	34	0.043	K	LTGMAFR	V
13	gi|329744642	glyceraldehyde-3-phosphate dehydrogenase [Sus scrofa]	285	30	2	86034	1	1	0	398.387	794.76	2	794.411	0.3494	0	37.37	29	34	0.027	K	LTGMAFR	V
13	gi|329744642	glyceraldehyde-3-phosphate dehydrogenase [Sus scrofa]	285	30	2	86037	1	1	0	398.394	794.773	2	794.411	0.3626	0	17.91	24	34	2.3	K	LTGMAFR	V
13	gi|329744642	glyceraldehyde-3-phosphate dehydrogenase [Sus scrofa]	285	30	2	86039	1	1	0	398.4	794.786	2	794.411	0.3752	0	37.15	29	34	0.026	K	LTGMAFR	V
13	gi|329744642	glyceraldehyde-3-phosphate dehydrogenase [Sus scrofa]	285	30	2	86043	1	1	0	398.402	794.79	2	794.411	0.3796	0	33.07	28	34	0.067	K	LTGMAFR	V
13	gi|329744642	glyceraldehyde-3-phosphate dehydrogenase [Sus scrofa]	285	30	2	86045	1	1	0	398.418	794.82	2	794.411	0.4096	0	28.86	26	33	0.15	K	LTGMAFR	V
13	gi|329744642	glyceraldehyde-3-phosphate dehydrogenase [Sus scrofa]	285	30	2	86050	1	1	0	398.436	794.858	2	794.411	0.4472	0	33.08	25	33	0.053	K	LTGMAFR	V
13	gi|329744642	glyceraldehyde-3-phosphate dehydrogenase [Sus scrofa]	285	30	2	86051	1	1	0	398.439	794.864	2	794.411	0.4532	0	41.99	30	33	0.0068	K	LTGMAFR	V
13	gi|329744642	glyceraldehyde-3-phosphate dehydrogenase [Sus scrofa]	285	30	2	86052	1	1	0	398.442	794.869	2	794.411	0.4584	0	35.92	28	33	0.027	K	LTGMAFR	V
13	gi|329744642	glyceraldehyde-3-phosphate dehydrogenase [Sus scrofa]	285	30	2	86053	1	1	0	398.444	794.873	2	794.411	0.4622	0	36.34	27	33	0.025	K	LTGMAFR	V
13	gi|329744642	glyceraldehyde-3-phosphate dehydrogenase [Sus scrofa]	285	30	2	86057	1	1	0	398.453	794.891	2	794.411	0.4802	0	37.93	30	33	0.017	K	LTGMAFR	V
13	gi|329744642	glyceraldehyde-3-phosphate dehydrogenase [Sus scrofa]	285	30	2	86065	1	1	0	398.497	794.979	2	794.411	0.5686	0	32.86	31	33	0.06	K	LTGMAFR	V
13	gi|329744642	glyceraldehyde-3-phosphate dehydrogenase [Sus scrofa]	285	30	2	86071	1	1	0	398.505	794.996	2	794.411	0.585	0	24.85	23	33	0.4	K	LTGMAFR	V
13	gi|329744642	glyceraldehyde-3-phosphate dehydrogenase [Sus scrofa]	285	30	2	87913	1	1	0	811.269	810.262	1	810.406	-0.1436	0	16.06	23	34	3.5	K	LTGMAFR	V	Oxidation (M)	0.0001000.0
13	gi|329744642	glyceraldehyde-3-phosphate dehydrogenase [Sus scrofa]	285	30	2	87917	1	1	0	811.318	810.31	1	810.406	-0.0954	0	26.13	23	34	0.35	K	LTGMAFR	V	Oxidation (M)	0.0001000.0
13	gi|329744642	glyceraldehyde-3-phosphate dehydrogenase [Sus scrofa]	285	30	2	87924	1	1	0	811.376	810.369	1	810.406	-0.0366	0	16.51	27	34	3.2	K	LTGMAFR	V	Oxidation (M)	0.0001000.0
13	gi|329744642	glyceraldehyde-3-phosphate dehydrogenase [Sus scrofa]	285	30	2	87930	2	1	0	811.425	810.418	1	810.406	0.0123	0	13.66	27	34	6.2	K	LTGMAFR	V	Oxidation (M)	0.0001000.0
13	gi|329744642	glyceraldehyde-3-phosphate dehydrogenase [Sus scrofa]	285	30	2	87955	1	1	0	406.307	810.6	2	810.406	0.1942	0	41.75		34	0.0096	K	LTGMAFR	V	Oxidation (M)	0.0001000.0
13	gi|329744642	glyceraldehyde-3-phosphate dehydrogenase [Sus scrofa]	285	30	2	87982	1	1	0	406.388	810.762	2	810.406	0.356	0	35.15	32	34	0.042	K	LTGMAFR	V	Oxidation (M)	0.0001000.0
13	gi|329744642	glyceraldehyde-3-phosphate dehydrogenase [Sus scrofa]	285	30	2	87990	1	1	0	406.405	810.796	2	810.406	0.3904	0	36.46	32	34	0.029	K	LTGMAFR	V	Oxidation (M)	0.0001000.0
13	gi|329744642	glyceraldehyde-3-phosphate dehydrogenase [Sus scrofa]	285	30	2	87995	1	1	0	406.416	810.817	2	810.406	0.4114	0	34.09	31	33	0.046	K	LTGMAFR	V	Oxidation (M)	0.0001000.0
13	gi|329744642	glyceraldehyde-3-phosphate dehydrogenase [Sus scrofa]	285	30	2	87997	1	1	0	406.419	810.824	2	810.406	0.4182	0	43.4		33	0.0053	K	LTGMAFR	V	Oxidation (M)	0.0001000.0
13	gi|329744642	glyceraldehyde-3-phosphate dehydrogenase [Sus scrofa]	285	30	2	87999	1	1	0	406.423	810.831	2	810.406	0.425	0	38.16	32	33	0.017	K	LTGMAFR	V	Oxidation (M)	0.0001000.0
13	gi|329744642	glyceraldehyde-3-phosphate dehydrogenase [Sus scrofa]	285	30	2	88003	1	1	0	406.435	810.856	2	810.406	0.4506	0	32.6	30	33	0.059	K	LTGMAFR	V	Oxidation (M)	0.0001000.0
13	gi|329744642	glyceraldehyde-3-phosphate dehydrogenase [Sus scrofa]	285	30	2	88004	1	1	0	406.438	810.862	2	810.406	0.4562	0	39.79	31	33	0.011	K	LTGMAFR	V	Oxidation (M)	0.0001000.0
13	gi|329744642	glyceraldehyde-3-phosphate dehydrogenase [Sus scrofa]	285	30	2	88006	1	1	0	406.442	810.869	2	810.406	0.463	0	34.46	31	33	0.037	K	LTGMAFR	V	Oxidation (M)	0.0001000.0
13	gi|329744642	glyceraldehyde-3-phosphate dehydrogenase [Sus scrofa]	285	30	2	88018	1	1	0	406.466	810.917	2	810.406	0.5108	0	44.84		33	0.0033	K	LTGMAFR	V	Oxidation (M)	0.0001000.0
13	gi|329744642	glyceraldehyde-3-phosphate dehydrogenase [Sus scrofa]	285	30	2	88021	1	1	0	406.479	810.944	2	810.406	0.5378	0	33.52	31	33	0.045	K	LTGMAFR	V	Oxidation (M)	0.0001000.0
13	gi|329744642	glyceraldehyde-3-phosphate dehydrogenase [Sus scrofa]	285	30	2	88026	1	1	0	406.485	810.955	2	810.406	0.549	0	38.93	32	33	0.013	K	LTGMAFR	V	Oxidation (M)	0.0001000.0
13	gi|329744642	glyceraldehyde-3-phosphate dehydrogenase [Sus scrofa]	285	30	2	88028	1	1	0	406.496	810.978	2	810.406	0.5724	0	31.1	31	33	0.083	K	LTGMAFR	V	Oxidation (M)	0.0001000.0
13	gi|329744642	glyceraldehyde-3-phosphate dehydrogenase [Sus scrofa]	285	30	2	88033	1	1	0	406.513	811.012	2	810.406	0.6058	0	28.7	27	33	0.16	K	LTGMAFR	V	Oxidation (M)	0.0001000.0
13	gi|329744642	glyceraldehyde-3-phosphate dehydrogenase [Sus scrofa]	285	30	2	95679	1	1	1	869.299	868.292	1	868.502	-0.2097	0	36.12	30	34	0.037	K	VIPELNGK	L
13	gi|329744642	glyceraldehyde-3-phosphate dehydrogenase [Sus scrofa]	285	30	2	95684	1	1	1	869.333	868.326	1	868.502	-0.1757	0	36.02		34	0.038	K	VIPELNGK	L
13	gi|329744642	glyceraldehyde-3-phosphate dehydrogenase [Sus scrofa]	285	30	2	95686	1	1	1	869.347	868.34	1	868.502	-0.1617	0	36	30	34	0.038	K	VIPELNGK	L
13	gi|329744642	glyceraldehyde-3-phosphate dehydrogenase [Sus scrofa]	285	30	2	95714	1	1	1	435.279	868.544	2	868.502	0.0426	0	35.2		34	0.046	K	VIPELNGK	L
13	gi|329744642	glyceraldehyde-3-phosphate dehydrogenase [Sus scrofa]	285	30	2	95715	1	1	1	435.281	868.548	2	868.502	0.0466	0	25.66	28	34	0.41	K	VIPELNGK	L
13	gi|329744642	glyceraldehyde-3-phosphate dehydrogenase [Sus scrofa]	285	30	2	95720	1	1	1	435.298	868.581	2	868.502	0.079	0	38.94	28	34	0.019	K	VIPELNGK	L
13	gi|329744642	glyceraldehyde-3-phosphate dehydrogenase [Sus scrofa]	285	30	2	95745	1	1	1	435.427	868.84	2	868.502	0.3378	0	28.27	28	34	0.19	K	VIPELNGK	L
13	gi|329744642	glyceraldehyde-3-phosphate dehydrogenase [Sus scrofa]	285	30	2	95748	1	1	1	435.439	868.863	2	868.502	0.3608	0	16.04	25	33	2.9	K	VIPELNGK	L
13	gi|329744642	glyceraldehyde-3-phosphate dehydrogenase [Sus scrofa]	285	30	2	95750	1	1	1	435.447	868.879	2	868.502	0.3768	0	25.2	24	33	0.34	K	VIPELNGK	L
13	gi|329744642	glyceraldehyde-3-phosphate dehydrogenase [Sus scrofa]	285	30	2	95756	1	1	1	435.474	868.934	2	868.502	0.432	0	38.93	26	33	0.013	K	VIPELNGK	L
13	gi|329744642	glyceraldehyde-3-phosphate dehydrogenase [Sus scrofa]	285	30	2	95760	1	1	1	435.498	868.981	2	868.502	0.479	0	44.28	31	33	0.0038	K	VIPELNGK	L			emPAI	0.55
14	gi|335297667	PREDICTED: keratin, type I cuticular Ha6 isoform 2 [Sus scrofa]	256	8	5	126209	1	1	1	532.824	1063.63	2	1063.51	0.1258	0	40.18	33	35	0.017	K	GLCGTSGGISR	V
14	gi|335297667	PREDICTED: keratin, type I cuticular Ha6 isoform 2 [Sus scrofa]	256	8	5	161157	1	1	1	622.797	1243.58	2	1242.59	0.9872	1	20.47	20	34	1.3	R	TKYETELGMR	Q	Oxidation (M)	0.0000000010.0
14	gi|335297667	PREDICTED: keratin, type I cuticular Ha6 isoform 2 [Sus scrofa]	256	8	5	174618	1	1	1	654.954	1307.89	2	1307.68	0.2101	1	36.99	27	34	0.029	K	ARLESEIATYR	R
14	gi|335297667	PREDICTED: keratin, type I cuticular Ha6 isoform 2 [Sus scrofa]	256	8	5	183911	1	1	1	679.525	1357.04	2	1356.74	0.2991	0	85.35	24	34	4e-07	R	VPSLAGVGGSASSIR	L
14	gi|335297667	PREDICTED: keratin, type I cuticular Ha6 isoform 2 [Sus scrofa]	256	8	5	183949	1	1	1	679.567	1357.12	2	1356.74	0.3823	0	71.54	24	33	8.2e-06	R	VPSLAGVGGSASSIR	L
14	gi|335297667	PREDICTED: keratin, type I cuticular Ha6 isoform 2 [Sus scrofa]	256	8	5	228407	1	1	1	797.589	1593.16	2	1592.84	0.3227	0	30.25	18	33	0.11	R	LNVEVDAAPPVDLNK	I
14	gi|335297667	PREDICTED: keratin, type I cuticular Ha6 isoform 2 [Sus scrofa]	256	8	5	248233	1	1	1	854.124	1706.23	2	1705.8	0.4312	0	62.22	24	32	6e-05	K	LPAHPCATECQPAVR	V
14	gi|335297667	PREDICTED: keratin, type I cuticular Ha6 isoform 2 [Sus scrofa]	256	8	5	248250	1	1	1	569.789	1706.34	3	1705.8	0.5411	0	45.22	23	32	0.0025	K	LPAHPCATECQPAVR	V
14	gi|335297667	PREDICTED: keratin, type I cuticular Ha6 isoform 2 [Sus scrofa]	256	8	5	248314	1	1	1	569.988	1706.94	3	1705.8	1.1405	0	26.51	28	33	0.26	K	LPAHPCATECQPAVR	V
14	gi|335297667	PREDICTED: keratin, type I cuticular Ha6 isoform 2 [Sus scrofa]	256	8	5	248348	1	1	1	570.066	1707.18	3	1705.8	1.3739	0	46.62	25	33	0.0024	K	LPAHPCATECQPAVR	V
14	gi|335297667	PREDICTED: keratin, type I cuticular Ha6 isoform 2 [Sus scrofa]	256	8	5	305531	1	1	1	1085.82	2169.62	2	2169.13	0.4942	0	31.05	20	31	0.054	R	VPYVSSVPCAPAPQLSTQIR	T			emPAI	0.63
15	gi|211578396	uncharacterized protein LOC100156145 [Sus scrofa]	254	3	1	313687	1	1	1	1135.61	2269.21	2	2269.09	0.1218	0	105.32	31	32	2.6e-09	K	DVALSSGSACTSASLEPSYVLR	A
15	gi|211578396	uncharacterized protein LOC100156145 [Sus scrofa]	254	3	1	313837	1	1	1	1136.14	2270.26	2	2269.09	1.1718	0	112.28		32	5e-10	K	DVALSSGSACTSASLEPSYVLR	A
15	gi|211578396	uncharacterized protein LOC100156145 [Sus scrofa]	254	3	1	313838	1	1	1	1136.14	2270.26	2	2269.09	1.1738	0	98.43	30	32	1.2e-08	K	DVALSSGSACTSASLEPSYVLR	A			emPAI	0.06
18	gi|194037336	PREDICTED: keratin, type II cytoskeletal 1b [Sus scrofa]	174	9	3	119619	1	1	1	512.076	1022.14	2	1022.47	-0.3375	1	21.23	29	34	1.1	K	GSSKSGGGGSSR	V
18	gi|194037336	PREDICTED: keratin, type II cytoskeletal 1b [Sus scrofa]	174	9	3	119637	1	1	1	512.216	1022.42	2	1022.47	-0.0573	1	14.07	23	35	6.4	K	GSSKSGGGGSSR	V
18	gi|194037336	PREDICTED: keratin, type II cytoskeletal 1b [Sus scrofa]	174	9	3	119642	1	1	1	512.224	1022.43	2	1022.47	-0.0415	1	24.24	24	35	0.62	K	GSSKSGGGGSSR	V
18	gi|194037336	PREDICTED: keratin, type II cytoskeletal 1b [Sus scrofa]	174	9	3	119644	1	1	1	512.229	1022.44	2	1022.47	-0.0305	1	21.33	31	35	1.2	K	GSSKSGGGGSSR	V
18	gi|194037336	PREDICTED: keratin, type II cytoskeletal 1b [Sus scrofa]	174	9	3	119646	2	1	1	512.231	1022.45	2	1022.47	-0.0265	1	13.43	27	35	7.5	K	GSSKSGGGGSSR	V
18	gi|194037336	PREDICTED: keratin, type II cytoskeletal 1b [Sus scrofa]	174	9	3	119663	1	1	1	512.32	1022.63	2	1022.47	0.1515	1	14.83	24	35	5.4	K	GSSKSGGGGSSR	V
18	gi|194037336	PREDICTED: keratin, type II cytoskeletal 1b [Sus scrofa]	174	9	3	129253	1	0	0	541.385	1080.76	2	1081.59	-0.8358	1	35.52	27	34	0.043	K	FASFIDKVR	F
18	gi|194037336	PREDICTED: keratin, type II cytoskeletal 1b [Sus scrofa]	174	9	3	129267	1	0	0	541.406	1080.8	2	1081.59	-0.795	1	38.41	30	34	0.022	K	FASFIDKVR	F
18	gi|194037336	PREDICTED: keratin, type II cytoskeletal 1b [Sus scrofa]	174	9	3	147515	1	1	1	590.098	1178.18	2	1177.61	0.5719	0	39.37		34	0.015	K	YQELQITAGR	H
18	gi|194037336	PREDICTED: keratin, type II cytoskeletal 1b [Sus scrofa]	174	9	3	147566	1	1	1	590.417	1178.82	2	1177.61	1.2107	0	35.92		34	0.04	K	YQELQITAGR	H
18	gi|194037336	PREDICTED: keratin, type II cytoskeletal 1b [Sus scrofa]	174	9	3	147584	1	1	1	590.462	1178.91	2	1177.61	1.3013	0	39.16	34	34	0.019	K	YQELQITAGR	H
18	gi|194037336	PREDICTED: keratin, type II cytoskeletal 1b [Sus scrofa]	174	9	3	176031	1	1	1	439.801	1316.38	3	1315.7	0.6816	0	24.66	28	34	0.52	R	SLDLDSIIDAVR	T
18	gi|194037336	PREDICTED: keratin, type II cytoskeletal 1b [Sus scrofa]	174	9	3	192445	1	1	1	699.014	1396.01	2	1394.64	1.3718	0	13.48	24	34	6.1	R	VYSVGSPAGSGDGSR	A
18	gi|194037336	PREDICTED: keratin, type II cytoskeletal 1b [Sus scrofa]	174	9	3	207483	2	0	0	738.357	1474.7	2	1474.78	-0.0785	0	59.12		34	0.00016	R	FLEQQNQVLQTK	W
18	gi|194037336	PREDICTED: keratin, type II cytoskeletal 1b [Sus scrofa]	174	9	3	207549	1	0	0	738.577	1475.14	2	1474.78	0.3609	0	63		33	5.7e-05	R	FLEQQNQVLQTK	W
18	gi|194037336	PREDICTED: keratin, type II cytoskeletal 1b [Sus scrofa]	174	9	3	207550	1	0	0	738.577	1475.14	2	1474.78	0.3613	0	63.13		33	5.6e-05	R	FLEQQNQVLQTK	W
18	gi|194037336	PREDICTED: keratin, type II cytoskeletal 1b [Sus scrofa]	174	9	3	207640	1	0	0	738.915	1475.81	2	1474.78	1.0367	0	15.4	25	34	4	R	FLEQQNQVLQTK	W
18	gi|194037336	PREDICTED: keratin, type II cytoskeletal 1b [Sus scrofa]	174	9	3	207694	1	0	0	739.077	1476.14	2	1474.78	1.3617	0	60.08		33	0.00012	R	FLEQQNQVLQTK	W
18	gi|194037336	PREDICTED: keratin, type II cytoskeletal 1b [Sus scrofa]	174	9	3	232682	1	1	1	810.515	1619.02	2	1617.81	1.2008	1	17.25	28	33	2.3	K	TQEREQIMVLNNK	F	Oxidation (M)	0.0000000100000.0	emPAI	0.22
19	gi|148747492	keratin, type II cytoskeletal 2 epidermal [Sus scrofa]	148	4	1	207483	1	0	1	738.357	1474.7	2	1474.81	-0.1149	1	61.5		34	9.5e-05	R	FLEQQNQVLKTK	W
19	gi|148747492	keratin, type II cytoskeletal 2 epidermal [Sus scrofa]	148	4	1	207549	1	0	1	738.577	1475.14	2	1474.81	0.3245	1	63		33	5.7e-05	R	FLEQQNQVLKTK	W
19	gi|148747492	keratin, type II cytoskeletal 2 epidermal [Sus scrofa]	148	4	1	207550	1	0	1	738.577	1475.14	2	1474.81	0.3249	1	63.13		33	5.6e-05	R	FLEQQNQVLKTK	W
20	gi|350584000	PREDICTED: keratin, type II cytoskeletal 78-like [Sus scrofa]	146	4	1	207549	1	0	0	738.577	1475.14	2	1474.78	0.3609	0	63		33	5.7e-05	R	FLEQQNQVLQTK	W
20	gi|350584000	PREDICTED: keratin, type II cytoskeletal 78-like [Sus scrofa]	146	4	1	207550	1	0	0	738.577	1475.14	2	1474.78	0.3613	0	63.13		33	5.6e-05	R	FLEQQNQVLQTK	W
21	gi|335297670	PREDICTED: keratin, type I microfibrillar, 47.6 kDa-like [Sus scrofa]	122	2	1	208030	1	1	0	739.928	1477.84	2	1477.69	0.1518	0	77.45		34	2.5e-06	R	DSLENTLTETEAR	Y
21	gi|335297670	PREDICTED: keratin, type I microfibrillar, 47.6 kDa-like [Sus scrofa]	122	2	1	208046	1	1	0	740.019	1478.02	2	1477.69	0.334	0	75.98	28	34	3.5e-06	R	DSLENTLTETEAR	Y			emPAI	0.07
22	gi|311267256	PREDICTED: keratin, type I cuticular Ha2 [Sus scrofa]	122	2	1	208030	1	0	0	739.928	1477.84	2	1477.69	0.1518	0	77.45		34	2.5e-06	R	DSLENTLTETEAR	Y
22	gi|311267256	PREDICTED: keratin, type I cuticular Ha2 [Sus scrofa]	122	2	1	208046	1	0	0	740.019	1478.02	2	1477.69	0.334	0	75.98	28	34	3.5e-06	R	DSLENTLTETEAR	Y
26	gi|311267330	PREDICTED: keratin, type I cytoskeletal 10-like [Sus scrofa]	113	4	3	126330	1	1	0	355.759	1064.25	3	1063.6	0.6511	1	34.8		35	0.056	R	LASYLDKVR	A
26	gi|311267330	PREDICTED: keratin, type I cytoskeletal 10-like [Sus scrofa]	113	4	3	126351	1	1	0	355.793	1064.36	3	1063.6	0.7561	1	29.27	32	35	0.2	R	LASYLDKVR	A
26	gi|311267330	PREDICTED: keratin, type I cytoskeletal 10-like [Sus scrofa]	113	4	3	134740	1	1	0	555.11	1108.2	2	1108.48	-0.2781	0	21.98	33	34	0.88	R	DAEAWFNEK	S
26	gi|311267330	PREDICTED: keratin, type I cytoskeletal 10-like [Sus scrofa]	113	4	3	134815	1	1	0	555.252	1108.49	2	1108.48	0.0061	0	26.64		34	0.33	R	DAEAWFNEK	S
26	gi|311267330	PREDICTED: keratin, type I cytoskeletal 10-like [Sus scrofa]	113	4	3	134873	1	1	0	555.297	1108.58	2	1108.48	0.0959	0	34.33	34	34	0.056	R	DAEAWFNEK	S
26	gi|311267330	PREDICTED: keratin, type I cytoskeletal 10-like [Sus scrofa]	113	4	3	135112	1	1	0	555.39	1108.77	2	1108.48	0.2827	0	25.71	32	34	0.41	R	DAEAWFNEK	S
26	gi|311267330	PREDICTED: keratin, type I cytoskeletal 10-like [Sus scrofa]	113	4	3	135204	1	1	0	555.571	1109.13	2	1108.48	0.6445	0	35.69	27	33	0.031	R	DAEAWFNEK	S
26	gi|311267330	PREDICTED: keratin, type I cytoskeletal 10-like [Sus scrofa]	113	4	3	145285	1	1	1	583.528	1165.04	2	1164.58	0.4632	0	54.6		33	0.00039	R	LENEIQTYR	S
26	gi|311267330	PREDICTED: keratin, type I cytoskeletal 10-like [Sus scrofa]	113	4	3	157237	1	1	1	409.037	1224.09	3	1224.59	-0.5019	0	16.32	26	33	2.4	R	VLSSMVESETK	K	Oxidation (M)	0.00001000000.0
26	gi|311267330	PREDICTED: keratin, type I cytoskeletal 10-like [Sus scrofa]	113	4	3	157628	1	1	1	409.507	1225.5	3	1224.59	0.9084	0	19.47	24	34	1.6	R	VLSSMVESETK	K	Oxidation (M)	0.00001000000.0
26	gi|311267330	PREDICTED: keratin, type I cytoskeletal 10-like [Sus scrofa]	113	4	3	157645	1	1	1	409.533	1225.58	3	1224.59	0.9858	0	19.62	25	34	1.5	R	VLSSMVESETK	K	Oxidation (M)	0.00001000000.0
26	gi|311267330	PREDICTED: keratin, type I cytoskeletal 10-like [Sus scrofa]	113	4	3	172955	1	1	1	650.514	1299.01	2	1297.63	1.3806	1	13.04	26	34	6.7	R	MKYENEVTLR	Q	Oxidation (M)	0.1000000000.0
26	gi|311267330	PREDICTED: keratin, type I cytoskeletal 10-like [Sus scrofa]	113	4	3	183932	1	1	0	679.544	1357.07	2	1356.71	0.3623	1	29.24	24	34	0.15	R	QSVEADINGLRR	V
26	gi|311267330	PREDICTED: keratin, type I cytoskeletal 10-like [Sus scrofa]	113	4	3	183980	1	1	0	679.642	1357.27	2	1356.71	0.5579	1	20.69	25	33	0.99	R	QSVEADINGLRR	V
26	gi|311267330	PREDICTED: keratin, type I cytoskeletal 10-like [Sus scrofa]	113	4	3	183991	1	1	0	453.446	1357.32	3	1356.71	0.604	1	15.21	25	34	4	R	QSVEADINGLRR	V
26	gi|311267330	PREDICTED: keratin, type I cytoskeletal 10-like [Sus scrofa]	113	4	3	185693	1	1	1	683.571	1365.13	2	1364.63	0.4954	0	66.27		33	2.5e-05	R	SQYEQLAEQNR	R
26	gi|311267330	PREDICTED: keratin, type I cytoskeletal 10-like [Sus scrofa]	113	4	3	191013	1	1	1	695.848	1389.68	2	1389.67	0.0081	0	32.28	26	34	0.085	K	QSLEASLAETEGR	Y
26	gi|311267330	PREDICTED: keratin, type I cytoskeletal 10-like [Sus scrofa]	113	4	3	200322	1	1	1	718.07	1434.12	2	1433.76	0.3624	1	30.34	21	33	0.1	K	IRLENEIQTYR	S
26	gi|311267330	PREDICTED: keratin, type I cytoskeletal 10-like [Sus scrofa]	113	4	3	200334	1	1	1	718.088	1434.16	2	1433.76	0.3998	1	15.02	21	33	3.2	K	IRLENEIQTYR	S
26	gi|311267330	PREDICTED: keratin, type I cytoskeletal 10-like [Sus scrofa]	113	4	3	200502	1	1	1	718.54	1435.06	2	1433.76	1.3022	1	13.16	24	34	6.2	K	IRLENEIQTYR	S			emPAI	0.36
27	gi|350579257	PREDICTED: glycine dehydrogenase [decarboxylating], mitochondrial-like [Sus scrofa]	112	3	1	268263	1	1	1	920.141	1838.27	2	1837.9	0.3705	0	60.78	22	33	8.5e-05	K	TFCIPHGGGGPGMGPIGVK	K
34	gi|311255413	PREDICTED: keratin, type II cytoskeletal 79 [Sus scrofa]	101	7	3	124673	1	1	1	528.225	1054.44	2	1054.52	-0.0803	1	13.24	24	35	7.5	K	HGDNLRDTK	N
34	gi|311255413	PREDICTED: keratin, type II cytoskeletal 79 [Sus scrofa]	101	7	3	129253	1	0	0	541.385	1080.76	2	1081.59	-0.8358	1	35.52	27	34	0.043	K	FASFIDKVR	F
34	gi|311255413	PREDICTED: keratin, type II cytoskeletal 79 [Sus scrofa]	101	7	3	129267	1	0	0	541.406	1080.8	2	1081.59	-0.795	1	38.41	30	34	0.022	K	FASFIDKVR	F
34	gi|311255413	PREDICTED: keratin, type II cytoskeletal 79 [Sus scrofa]	101	7	3	130387	3	0	0	363.379	1087.11	3	1087.59	-0.4733	1	17.76	31	34	2.2	R	EQIKTLNDK	F
34	gi|311255413	PREDICTED: keratin, type II cytoskeletal 79 [Sus scrofa]	101	7	3	130412	8	0	0	363.408	1087.2	3	1087.59	-0.3848	1	14.77	34	35	5.7	R	EQIKTLNDK	F
34	gi|311255413	PREDICTED: keratin, type II cytoskeletal 79 [Sus scrofa]	101	7	3	138529	1	1	1	563.44	1124.87	2	1124.53	0.3366	1	19.86	24	34	1.5	K	KDVDAAFMGR	M	Oxidation (M)	0.0000000100.0
34	gi|311255413	PREDICTED: keratin, type II cytoskeletal 79 [Sus scrofa]	101	7	3	138533	2	1	1	563.444	1124.87	2	1124.53	0.3442	1	13.77	27	34	6.3	K	KDVDAAFMGR	M	Oxidation (M)	0.0000000100.0
34	gi|311255413	PREDICTED: keratin, type II cytoskeletal 79 [Sus scrofa]	101	7	3	138538	1	1	1	563.446	1124.88	2	1124.53	0.3488	1	13.97	26	34	6	K	KDVDAAFMGR	M	Oxidation (M)	0.0000000100.0
34	gi|311255413	PREDICTED: keratin, type II cytoskeletal 79 [Sus scrofa]	101	7	3	138547	1	1	1	563.456	1124.9	2	1124.53	0.3684	1	13.69	24	34	6.3	K	KDVDAAFMGR	M	Oxidation (M)	0.0000000100.0
34	gi|311255413	PREDICTED: keratin, type II cytoskeletal 79 [Sus scrofa]	101	7	3	138556	2	1	1	563.467	1124.92	2	1124.53	0.391	1	13.71	23	34	6	K	KDVDAAFMGR	M	Oxidation (M)	0.0000000100.0
34	gi|311255413	PREDICTED: keratin, type II cytoskeletal 79 [Sus scrofa]	101	7	3	138594	1	1	1	563.548	1125.08	2	1124.53	0.552	1	13.86	24	33	4.5	K	KDVDAAFMGR	M	Oxidation (M)	0.0000000100.0
34	gi|311255413	PREDICTED: keratin, type II cytoskeletal 79 [Sus scrofa]	101	7	3	138665	4	1	1	563.826	1125.64	2	1124.53	1.109	1	13.11	29	34	7.6	K	KDVDAAFMGR	M	Oxidation (M)	0.0000000100.0
34	gi|311255413	PREDICTED: keratin, type II cytoskeletal 79 [Sus scrofa]	101	7	3	158883	2	1	1	412.464	1234.37	3	1233.63	0.7379	0	16.31	30	34	3.7	K	SISVSVAGGASSGR	N
34	gi|311255413	PREDICTED: keratin, type II cytoskeletal 79 [Sus scrofa]	101	7	3	158973	2	1	1	412.584	1234.73	3	1233.63	1.0997	0	17.9	32	34	2.6	K	SISVSVAGGASSGR	N
34	gi|311255413	PREDICTED: keratin, type II cytoskeletal 79 [Sus scrofa]	101	7	3	163061	2	1	0	627.7	1253.39	2	1253.56	-0.1738	0	15.97	30	34	3.6	R	NMQDLVEDFK	N	Oxidation (M)	0.0100000000.0
34	gi|311255413	PREDICTED: keratin, type II cytoskeletal 79 [Sus scrofa]	101	7	3	178016	1	1	0	665.237	1328.46	2	1328.72	-0.2597	0	38.19	26	34	0.022	R	NLDLDSIIAEVK	A
34	gi|311255413	PREDICTED: keratin, type II cytoskeletal 79 [Sus scrofa]	101	7	3	178263	1	1	0	665.677	1329.34	2	1328.72	0.6205	0	27.13	23	34	0.28	R	NLDLDSIIAEVK	A
34	gi|311255413	PREDICTED: keratin, type II cytoskeletal 79 [Sus scrofa]	101	7	3	195627	7	1	1	707.775	1413.54	2	1413.76	-0.2219	1	13.02	32	34	7	R	TVQRLQGEVDAAK	K
34	gi|311255413	PREDICTED: keratin, type II cytoskeletal 79 [Sus scrofa]	101	7	3	195719	6	1	1	708.019	1414.02	2	1413.76	0.2669	1	13.03	29	34	6.7	R	TVQRLQGEVDAAK	K
34	gi|311255413	PREDICTED: keratin, type II cytoskeletal 79 [Sus scrofa]	101	7	3	207483	4	0	0	738.357	1474.7	2	1475.8	-1.0989	1	36.74		34	0.028	R	FLEQQNKVLETK	W
34	gi|311255413	PREDICTED: keratin, type II cytoskeletal 79 [Sus scrofa]	101	7	3	207549	3	0	0	738.577	1475.14	2	1475.8	-0.6595	1	42.91		33	0.0058	R	FLEQQNKVLETK	W
34	gi|311255413	PREDICTED: keratin, type II cytoskeletal 79 [Sus scrofa]	101	7	3	207550	3	0	0	738.577	1475.14	2	1475.8	-0.6591	1	44.44		33	0.0041	R	FLEQQNKVLETK	W
34	gi|311255413	PREDICTED: keratin, type II cytoskeletal 79 [Sus scrofa]	101	7	3	207694	3	0	0	739.077	1476.14	2	1475.8	0.3413	1	46.41		33	0.0027	R	FLEQQNKVLETK	W
34	gi|311255413	PREDICTED: keratin, type II cytoskeletal 79 [Sus scrofa]	101	7	3	207812	1	0	0	739.37	1476.73	2	1475.8	0.9273	1	13.29	22	34	6.5	R	FLEQQNKVLETK	W			emPAI	0.18
35	gi|311255373	PREDICTED: keratin, type II cuticular Hb3-like [Sus scrofa]	100	2	2	48938	6	1	0	546.507	545.5	1	544.333	1.1667	0	13.34	29	38	18	K	ATVVR	H
35	gi|311255373	PREDICTED: keratin, type II cuticular Hb3-like [Sus scrofa]	100	2	2	107151	2	1	0	952.555	951.547	1	950.471	1.0765	0	14	26	35	6.6	R	LYEEEIR	V
35	gi|311255373	PREDICTED: keratin, type II cuticular Hb3-like [Sus scrofa]	100	2	2	129965	1	1	0	543.314	1084.61	2	1084.61	0.0009	0	23.75	28	35	0.71	K	LAELEAALQK	A
35	gi|311255373	PREDICTED: keratin, type II cuticular Hb3-like [Sus scrofa]	100	2	2	130004	1	1	0	543.39	1084.77	2	1084.61	0.1523	0	73.13		35	8.2e-06	K	LAELEAALQK	A
35	gi|311255373	PREDICTED: keratin, type II cuticular Hb3-like [Sus scrofa]	100	2	2	141671	1	1	1	383.296	1146.87	3	1147.63	-0.7676	1	14.18	25	35	6.5	K	VRFLEQQTK	L
35	gi|311255373	PREDICTED: keratin, type II cuticular Hb3-like [Sus scrofa]	100	2	2	178434	1	1	0	666.046	1330.08	2	1330.65	-0.5702	1	15.43	25	34	3.6	R	REAELVEADSGR	L
35	gi|311255373	PREDICTED: keratin, type II cuticular Hb3-like [Sus scrofa]	100	2	2	178651	1	1	0	666.527	1331.04	2	1330.65	0.391	1	13.5	22	34	6.2	R	REAELVEADSGR	L
35	gi|311255373	PREDICTED: keratin, type II cuticular Hb3-like [Sus scrofa]	100	2	2	207694	5	0	1	739.077	1476.14	2	1476.82	-0.6791	1	20.75		33	0.99	R	FLEQQTKLLETK	L
35	gi|311255373	PREDICTED: keratin, type II cuticular Hb3-like [Sus scrofa]	100	2	2	218081	1	1	0	767.442	1532.87	2	1531.8	1.0673	1	19.39	23	34	1.6	R	MIQRLTAEIENAK	C	Oxidation (M)	0.1000000000000.0
35	gi|311255373	PREDICTED: keratin, type II cuticular Hb3-like [Sus scrofa]	100	2	2	283539	1	1	0	653.454	1957.34	3	1956.03	1.3074	1	54.69	20	32	0.0003	R	LASELNHVQEVLEGYKK	K			emPAI	0.12
36	gi|311255369	PREDICTED: keratin, type II cuticular Hb1-like isoform 4 [Sus scrofa]	100	2	2	48938	6	0	0	546.507	545.5	1	544.333	1.1667	0	13.34	29	38	18	K	ATVVR	H
36	gi|311255369	PREDICTED: keratin, type II cuticular Hb1-like isoform 4 [Sus scrofa]	100	2	2	107151	2	0	0	952.555	951.547	1	950.471	1.0765	0	14	26	35	6.6	R	LYEEEIR	V
36	gi|311255369	PREDICTED: keratin, type II cuticular Hb1-like isoform 4 [Sus scrofa]	100	2	2	129965	1	0	0	543.314	1084.61	2	1084.61	0.0009	0	23.75	28	35	0.71	K	LAELEAALQK	A
36	gi|311255369	PREDICTED: keratin, type II cuticular Hb1-like isoform 4 [Sus scrofa]	100	2	2	130004	1	0	0	543.39	1084.77	2	1084.61	0.1523	0	73.13		35	8.2e-06	K	LAELEAALQK	A
36	gi|311255369	PREDICTED: keratin, type II cuticular Hb1-like isoform 4 [Sus scrofa]	100	2	2	144706	1	1	0	388.267	1161.78	3	1160.63	1.1481	1	17.18	28	35	3.3	K	EQIKFLNNR	F
36	gi|311255369	PREDICTED: keratin, type II cuticular Hb1-like isoform 4 [Sus scrofa]	100	2	2	178434	1	0	0	666.046	1330.08	2	1330.65	-0.5702	1	15.43	25	34	3.6	R	REAELVEADSGR	L
36	gi|311255369	PREDICTED: keratin, type II cuticular Hb1-like isoform 4 [Sus scrofa]	100	2	2	178651	1	0	0	666.527	1331.04	2	1330.65	0.391	1	13.5	22	34	6.2	R	REAELVEADSGR	L
36	gi|311255369	PREDICTED: keratin, type II cuticular Hb1-like isoform 4 [Sus scrofa]	100	2	2	218081	1	0	0	767.442	1532.87	2	1531.8	1.0673	1	19.39	23	34	1.6	R	MIQRLTAEIENAK	C	Oxidation (M)	0.1000000000000.0
36	gi|311255369	PREDICTED: keratin, type II cuticular Hb1-like isoform 4 [Sus scrofa]	100	2	2	283539	1	0	0	653.454	1957.34	3	1956.03	1.3074	1	54.69	20	32	0.0003	R	LASELNHVQEVLEGYKK	K			emPAI	0.12
40	gi|335287827	PREDICTED: keratin, type II cytoskeletal 73 [Sus scrofa]	87	6	2	101515	9	1	1	458.824	915.633	2	916.461	-0.8279	0	13.77		36	8.7	K	AEISDLNR	L
40	gi|335287827	PREDICTED: keratin, type II cytoskeletal 73 [Sus scrofa]	87	6	2	101521	3	1	1	458.837	915.659	2	916.461	-0.8021	0	19.81		36	2.2	K	AEISDLNR	L
40	gi|335287827	PREDICTED: keratin, type II cytoskeletal 73 [Sus scrofa]	87	6	2	101562	7	1	1	458.964	915.914	2	916.461	-0.5477	0	14	32	35	6.6	K	AEISDLNR	L
40	gi|335287827	PREDICTED: keratin, type II cytoskeletal 73 [Sus scrofa]	87	6	2	101564	5	1	1	458.968	915.921	2	916.461	-0.5407	0	18.15		34	2.4	K	AEISDLNR	L
40	gi|335287827	PREDICTED: keratin, type II cytoskeletal 73 [Sus scrofa]	87	6	2	101590	8	1	1	459.011	916.008	2	916.461	-0.4535	0	13.12	31	34	7	K	AEISDLNR	L
40	gi|335287827	PREDICTED: keratin, type II cytoskeletal 73 [Sus scrofa]	87	6	2	129253	1	0	0	541.385	1080.76	2	1081.59	-0.8358	1	35.52	27	34	0.043	K	FASFIDKVR	F
40	gi|335287827	PREDICTED: keratin, type II cytoskeletal 73 [Sus scrofa]	87	6	2	129267	1	0	0	541.406	1080.8	2	1081.59	-0.795	1	38.41	30	34	0.022	K	FASFIDKVR	F
40	gi|335287827	PREDICTED: keratin, type II cytoskeletal 73 [Sus scrofa]	87	6	2	141992	1	1	1	575.822	1149.63	2	1149.59	0.0414	1	13.91	24	35	6.6	R	AGGKGLSGGFGSR	S
40	gi|335287827	PREDICTED: keratin, type II cytoskeletal 73 [Sus scrofa]	87	6	2	142002	1	1	1	575.857	1149.7	2	1149.59	0.11	1	16.59	24	35	3.5	R	AGGKGLSGGFGSR	S
40	gi|335287827	PREDICTED: keratin, type II cytoskeletal 73 [Sus scrofa]	87	6	2	142099	1	1	1	576.12	1150.23	2	1149.59	0.637	1	14.23	18	34	5.5	R	AGGKGLSGGFGSR	S
40	gi|335287827	PREDICTED: keratin, type II cytoskeletal 73 [Sus scrofa]	87	6	2	142125	1	1	1	576.189	1150.36	2	1149.59	0.7738	1	16.43	25	35	3.6	R	AGGKGLSGGFGSR	S
40	gi|335287827	PREDICTED: keratin, type II cytoskeletal 73 [Sus scrofa]	87	6	2	183941	1	1	0	679.556	1357.1	2	1357.71	-0.612	0	24.79		33	0.41	R	DLDLDSIIAEVR	A
40	gi|335287827	PREDICTED: keratin, type II cytoskeletal 73 [Sus scrofa]	87	6	2	207483	3	0	0	738.357	1474.7	2	1475.76	-1.0625	0	37.6		34	0.023	R	FLEQQNQVLETK	W
40	gi|335287827	PREDICTED: keratin, type II cytoskeletal 73 [Sus scrofa]	87	6	2	207549	3	0	0	738.577	1475.14	2	1475.76	-0.6231	0	42.91		33	0.0058	R	FLEQQNQVLETK	W
40	gi|335287827	PREDICTED: keratin, type II cytoskeletal 73 [Sus scrofa]	87	6	2	207550	3	0	0	738.577	1475.14	2	1475.76	-0.6227	0	44.44		33	0.0041	R	FLEQQNQVLETK	W
40	gi|335287827	PREDICTED: keratin, type II cytoskeletal 73 [Sus scrofa]	87	6	2	207694	3	0	0	739.077	1476.14	2	1475.76	0.3777	0	46.41		33	0.0027	R	FLEQQNQVLETK	W
40	gi|335287827	PREDICTED: keratin, type II cytoskeletal 73 [Sus scrofa]	87	6	2	207812	1	0	0	739.37	1476.73	2	1475.76	0.9637	0	13.29	22	34	6.5	R	FLEQQNQVLETK	W
40	gi|335287827	PREDICTED: keratin, type II cytoskeletal 73 [Sus scrofa]	87	6	2	220090	2	1	1	773.051	1544.09	2	1543.74	0.3496	1	14.95	29	34	4	R	MLREYQELMSTK	L	Oxidation (M)	0.100000000000.0	emPAI	0.12
41	gi|345091038	keratin 74 [Sus scrofa]	87	6	2	119622	1	1	1	512.093	1022.17	2	1022.55	-0.3792	1	13.88	25	34	6.4	R	KALGSAASYR	A
41	gi|345091038	keratin 74 [Sus scrofa]	87	6	2	129253	1	0	0	541.385	1080.76	2	1081.59	-0.8358	1	35.52	27	34	0.043	K	FASFIDKVR	F
41	gi|345091038	keratin 74 [Sus scrofa]	87	6	2	129267	1	0	0	541.406	1080.8	2	1081.59	-0.795	1	38.41	30	34	0.022	K	FASFIDKVR	F
41	gi|345091038	keratin 74 [Sus scrofa]	87	6	2	183941	1	0	0	679.556	1357.1	2	1357.71	-0.612	0	24.79		33	0.41	R	DLDLDSIIAEVR	A
41	gi|345091038	keratin 74 [Sus scrofa]	87	6	2	207483	3	0	0	738.357	1474.7	2	1475.76	-1.0625	0	37.6		34	0.023	R	FLEQQNQVLETK	W
41	gi|345091038	keratin 74 [Sus scrofa]	87	6	2	207549	3	0	0	738.577	1475.14	2	1475.76	-0.6231	0	42.91		33	0.0058	R	FLEQQNQVLETK	W
41	gi|345091038	keratin 74 [Sus scrofa]	87	6	2	207550	3	0	0	738.577	1475.14	2	1475.76	-0.6227	0	44.44		33	0.0041	R	FLEQQNQVLETK	W
41	gi|345091038	keratin 74 [Sus scrofa]	87	6	2	207694	3	0	0	739.077	1476.14	2	1475.76	0.3777	0	46.41		33	0.0027	R	FLEQQNQVLETK	W
41	gi|345091038	keratin 74 [Sus scrofa]	87	6	2	207812	1	0	0	739.37	1476.73	2	1475.76	0.9637	0	13.29	22	34	6.5	R	FLEQQNQVLETK	W			emPAI	0.12
42	gi|47523720	glucose-6-phosphate isomerase [Sus scrofa]	87	3	2	68554	1	1	1	344.708	687.402	2	686.36	1.0418	0	20.38	29	37	2.4	K	DPSAVAK	H
42	gi|47523720	glucose-6-phosphate isomerase [Sus scrofa]	87	3	2	91676	1	1	1	423.003	843.992	2	844.452	-0.4592	1	24.3		35	0.6	K	SRGVEAAR	E
42	gi|47523720	glucose-6-phosphate isomerase [Sus scrofa]	87	3	2	91679	1	1	1	423.006	843.998	2	844.452	-0.4534	1	21.95	32	35	1	K	SRGVEAAR	E
42	gi|47523720	glucose-6-phosphate isomerase [Sus scrofa]	87	3	2	91682	2	1	1	423.011	844.008	2	844.452	-0.4432	1	21.19		35	1.3	K	SRGVEAAR	E
42	gi|47523720	glucose-6-phosphate isomerase [Sus scrofa]	87	3	2	91689	2	1	1	423.022	844.029	2	844.452	-0.4222	1	17.02	29	35	3.6	K	SRGVEAAR	E
42	gi|47523720	glucose-6-phosphate isomerase [Sus scrofa]	87	3	2	91700	4	1	1	423.051	844.088	2	844.452	-0.3638	1	13.53	27	36	9.9	K	SRGVEAAR	E
42	gi|47523720	glucose-6-phosphate isomerase [Sus scrofa]	87	3	2	92042	2	1	1	423.467	844.919	2	844.452	0.468	1	22.11		35	0.98	K	SRGVEAAR	E
42	gi|47523720	glucose-6-phosphate isomerase [Sus scrofa]	87	3	2	92054	1	0	1	423.487	844.96	2	844.452	0.5084	1	22.24	32	35	0.95	K	SRGVEAAR	E
42	gi|47523720	glucose-6-phosphate isomerase [Sus scrofa]	87	3	2	92109	1	1	1	423.803	845.592	2	844.452	1.1402	1	22.6	32	36	1.3	K	SRGVEAAR	E
42	gi|47523720	glucose-6-phosphate isomerase [Sus scrofa]	87	3	2	96631	1	1	1	293.682	878.024	3	877.55	0.4747	0	34.4	30	34	0.052	R	AVLHVALR	N
42	gi|47523720	glucose-6-phosphate isomerase [Sus scrofa]	87	3	2	96636	1	1	1	293.696	878.067	3	877.55	0.5167	0	36.24		35	0.039	R	AVLHVALR	N
42	gi|47523720	glucose-6-phosphate isomerase [Sus scrofa]	87	3	2	198817	1	1	1	476.591	1426.75	3	1427.74	-0.9937	1	21.43	27	34	0.96	K	DVMPEVNRVLEK	M
42	gi|47523720	glucose-6-phosphate isomerase [Sus scrofa]	87	3	2	198842	1	1	1	476.656	1426.95	3	1427.74	-0.7966	1	21.5	31	34	0.94	K	DVMPEVNRVLEK	M
42	gi|47523720	glucose-6-phosphate isomerase [Sus scrofa]	87	3	2	201889	5	1	1	723.145	1444.28	2	1443.74	0.5371	1	13.47	32	33	4.7	K	DVMPEVNRVLEK	M	Oxidation (M)	0.001000000000.0
42	gi|47523720	glucose-6-phosphate isomerase [Sus scrofa]	87	3	2	245782	1	1	1	846.536	1691.06	2	1691.72	-0.6679	0	73.21	21	33	5.5e-06	R	FAAYFQQGDMESNGK	Y			emPAI	0.11
43	gi|350580091	PREDICTED: proteoglycan 3-like [Sus scrofa]	86	2	1	202466	1	1	1	725.244	1448.47	2	1447.76	0.7131	0	65.88	23	34	3.6e-05	R	INSFIQNAICLR	N			emPAI	0.13
44	gi|194037334	PREDICTED: keratin, type II cytoskeletal 3-like [Sus scrofa]	86	6	2	68176	1	1	1	686.992	685.985	1	686.371	-0.3862	0	13.99	17	35	7.9	K	NELGVR	G
44	gi|194037334	PREDICTED: keratin, type II cytoskeletal 3-like [Sus scrofa]	86	6	2	68565	9	1	1	689.195	688.188	1	687.355	0.8328	0	13.84	33	37	10	K	DELGVR	G
44	gi|194037334	PREDICTED: keratin, type II cytoskeletal 3-like [Sus scrofa]	86	6	2	97069	1	1	1	442.474	882.934	2	882.504	0.4309	1	23.28	25	33	0.49	K	PELGVRGR	S
44	gi|194037334	PREDICTED: keratin, type II cytoskeletal 3-like [Sus scrofa]	86	6	2	97070	1	1	1	442.487	882.96	2	882.504	0.4561	1	22.47	30	33	0.58	K	PELGVRGR	S
44	gi|194037334	PREDICTED: keratin, type II cytoskeletal 3-like [Sus scrofa]	86	6	2	97072	2	1	1	442.496	882.978	2	882.504	0.4743	1	16.1	30	33	2.5	K	PELGVRGR	S
44	gi|194037334	PREDICTED: keratin, type II cytoskeletal 3-like [Sus scrofa]	86	6	2	97073	1	1	1	442.543	883.072	2	882.504	0.5681	1	15.77	24	34	3.3	K	PELGVRGR	S
44	gi|194037334	PREDICTED: keratin, type II cytoskeletal 3-like [Sus scrofa]	86	6	2	97074	2	1	1	442.552	883.089	2	882.504	0.5855	1	17.66	32	34	2.2	K	PELGVRGR	S
44	gi|194037334	PREDICTED: keratin, type II cytoskeletal 3-like [Sus scrofa]	86	6	2	129253	1	0	0	541.385	1080.76	2	1081.59	-0.8358	1	35.52	27	34	0.043	K	FASFIDKVR	F
44	gi|194037334	PREDICTED: keratin, type II cytoskeletal 3-like [Sus scrofa]	86	6	2	129267	1	0	0	541.406	1080.8	2	1081.59	-0.795	1	38.41	30	34	0.022	K	FASFIDKVR	F
44	gi|194037334	PREDICTED: keratin, type II cytoskeletal 3-like [Sus scrofa]	86	6	2	130387	3	0	0	363.379	1087.11	3	1087.59	-0.4733	1	17.76	31	34	2.2	R	EQIKTLNDK	F
44	gi|194037334	PREDICTED: keratin, type II cytoskeletal 3-like [Sus scrofa]	86	6	2	130412	8	0	0	363.408	1087.2	3	1087.59	-0.3848	1	14.77	34	35	5.7	R	EQIKTLNDK	F
44	gi|194037334	PREDICTED: keratin, type II cytoskeletal 3-like [Sus scrofa]	86	6	2	140333	2	1	1	568.793	1135.57	2	1135.62	-0.0472	1	13.32	27	35	7.8	R	ISSTKSSLASR	S
44	gi|194037334	PREDICTED: keratin, type II cytoskeletal 3-like [Sus scrofa]	86	6	2	140384	1	1	1	569.062	1136.11	2	1135.62	0.49	1	13.31	25	33	5.4	R	ISSTKSSLASR	S
44	gi|194037334	PREDICTED: keratin, type II cytoskeletal 3-like [Sus scrofa]	86	6	2	171389	1	1	1	646.889	1291.76	2	1290.65	1.1107	1	14.59	18	34	5.1	K	STRSEISELNR	L
44	gi|194037334	PREDICTED: keratin, type II cytoskeletal 3-like [Sus scrofa]	86	6	2	183941	1	0	0	679.556	1357.1	2	1357.71	-0.612	0	24.79		33	0.41	R	DLDLDSIIAEVR	A
44	gi|194037334	PREDICTED: keratin, type II cytoskeletal 3-like [Sus scrofa]	86	6	2	207483	4	0	0	738.357	1474.7	2	1475.8	-1.0989	1	36.74		34	0.028	R	FLEQQNKVLETK	W
44	gi|194037334	PREDICTED: keratin, type II cytoskeletal 3-like [Sus scrofa]	86	6	2	207549	3	0	0	738.577	1475.14	2	1475.8	-0.6595	1	42.91		33	0.0058	R	FLEQQNKVLETK	W
44	gi|194037334	PREDICTED: keratin, type II cytoskeletal 3-like [Sus scrofa]	86	6	2	207550	3	0	0	738.577	1475.14	2	1475.8	-0.6591	1	44.44		33	0.0041	R	FLEQQNKVLETK	W
44	gi|194037334	PREDICTED: keratin, type II cytoskeletal 3-like [Sus scrofa]	86	6	2	207694	3	0	0	739.077	1476.14	2	1475.8	0.3413	1	46.41		33	0.0027	R	FLEQQNKVLETK	W
44	gi|194037334	PREDICTED: keratin, type II cytoskeletal 3-like [Sus scrofa]	86	6	2	207812	1	0	0	739.37	1476.73	2	1475.8	0.9273	1	13.29	22	34	6.5	R	FLEQQNKVLETK	W			emPAI	0.1
45	gi|350583995	PREDICTED: keratin, type II cytoskeletal 75-like [Sus scrofa]	86	6	2	115831	1	1	1	505.344	1008.67	2	1007.55	1.1224	1	14.11	22	35	6.2	K	RISISGGYR	S
45	gi|350583995	PREDICTED: keratin, type II cytoskeletal 75-like [Sus scrofa]	86	6	2	115862	1	1	1	505.352	1008.69	2	1007.55	1.1386	1	13.29	15	35	7.4	K	RISISGGYR	S
45	gi|350583995	PREDICTED: keratin, type II cytoskeletal 75-like [Sus scrofa]	86	6	2	128597	1	1	1	539.466	1076.92	2	1077.58	-0.6596	1	13.15	25	35	7.8	R	SSVTIKSGGSR	N
45	gi|350583995	PREDICTED: keratin, type II cytoskeletal 75-like [Sus scrofa]	86	6	2	129253	1	0	0	541.385	1080.76	2	1081.59	-0.8358	1	35.52	27	34	0.043	K	FASFIDKVR	F
45	gi|350583995	PREDICTED: keratin, type II cytoskeletal 75-like [Sus scrofa]	86	6	2	129267	1	0	0	541.406	1080.8	2	1081.59	-0.795	1	38.41	30	34	0.022	K	FASFIDKVR	F
45	gi|350583995	PREDICTED: keratin, type II cytoskeletal 75-like [Sus scrofa]	86	6	2	130387	3	0	0	363.379	1087.11	3	1086.6	0.5107	1	17.76	31	34	2.2	R	EQIKTLNNK	F
45	gi|350583995	PREDICTED: keratin, type II cytoskeletal 75-like [Sus scrofa]	86	6	2	130412	2	0	0	363.408	1087.2	3	1086.6	0.5992	1	20.68	34	35	1.5	R	LRSEIDNLK	K
45	gi|350583995	PREDICTED: keratin, type II cytoskeletal 75-like [Sus scrofa]	86	6	2	139385	6	1	0	565.57	1129.13	2	1128.6	0.5226	0	13.78	31	33	5.2	K	LAELEDALQK	A
45	gi|350583995	PREDICTED: keratin, type II cytoskeletal 75-like [Sus scrofa]	86	6	2	145601	1	1	1	389.985	1166.93	3	1165.61	1.3219	1	14.5	23	34	4.9	-	MTQRSSVTIK	S	Oxidation (M)	0.1000000000.0
45	gi|350583995	PREDICTED: keratin, type II cytoskeletal 75-like [Sus scrofa]	86	6	2	176612	4	1	0	661.829	1321.64	2	1322.65	-1.0071	1	14.82	31	34	4.6	R	STKMEISELNR	V	Oxidation (M)	0.00010000000.0
45	gi|350583995	PREDICTED: keratin, type II cytoskeletal 75-like [Sus scrofa]	86	6	2	176666	4	1	0	662.052	1322.09	2	1322.65	-0.5615	1	14.27	33	33	4.2	R	STKMEISELNR	V	Oxidation (M)	0.00010000000.0
45	gi|350583995	PREDICTED: keratin, type II cytoskeletal 75-like [Sus scrofa]	86	6	2	176680	4	1	0	662.091	1322.17	2	1322.65	-0.4817	1	15.68		32	2.6	R	STKMEISELNR	V	Oxidation (M)	0.00010000000.0
45	gi|350583995	PREDICTED: keratin, type II cytoskeletal 75-like [Sus scrofa]	86	6	2	176683	4	1	0	662.1	1322.18	2	1322.65	-0.4651	1	14.39	32	32	3.6	R	STKMEISELNR	V	Oxidation (M)	0.00010000000.0
45	gi|350583995	PREDICTED: keratin, type II cytoskeletal 75-like [Sus scrofa]	86	6	2	176686	7	1	0	662.105	1322.19	2	1322.65	-0.4555	1	13.04	31	33	5	R	STKMEISELNR	V	Oxidation (M)	0.00010000000.0
45	gi|350583995	PREDICTED: keratin, type II cytoskeletal 75-like [Sus scrofa]	86	6	2	176688	6	1	0	662.106	1322.2	2	1322.65	-0.4535	1	15.64	32	33	2.7	R	STKMEISELNR	V	Oxidation (M)	0.00010000000.0
45	gi|350583995	PREDICTED: keratin, type II cytoskeletal 75-like [Sus scrofa]	86	6	2	207483	4	0	0	738.357	1474.7	2	1475.8	-1.0989	1	36.74		34	0.028	R	FLEQQNKVLETK	W
45	gi|350583995	PREDICTED: keratin, type II cytoskeletal 75-like [Sus scrofa]	86	6	2	207549	3	0	0	738.577	1475.14	2	1475.8	-0.6595	1	42.91		33	0.0058	R	FLEQQNKVLETK	W
45	gi|350583995	PREDICTED: keratin, type II cytoskeletal 75-like [Sus scrofa]	86	6	2	207550	3	0	0	738.577	1475.14	2	1475.8	-0.6591	1	44.44		33	0.0041	R	FLEQQNKVLETK	W
45	gi|350583995	PREDICTED: keratin, type II cytoskeletal 75-like [Sus scrofa]	86	6	2	207694	3	0	0	739.077	1476.14	2	1475.8	0.3413	1	46.41		33	0.0027	R	FLEQQNKVLETK	W
45	gi|350583995	PREDICTED: keratin, type II cytoskeletal 75-like [Sus scrofa]	86	6	2	207812	1	0	0	739.37	1476.73	2	1475.8	0.9273	1	13.29	22	34	6.5	R	FLEQQNKVLETK	W			emPAI	0.13
46	gi|350583998	PREDICTED: hypothetical protein LOC100157304 [Sus scrofa]	86	6	2	53576	9	1	0	573.337	572.33	1	572.328	0.0013	0	13.1	31	37	15	K	VDALR	D
46	gi|350583998	PREDICTED: hypothetical protein LOC100157304 [Sus scrofa]	86	6	2	53582	8	1	0	573.395	572.388	1	572.328	0.0594	0	15.98	33	37	7.8	K	VDALR	D
46	gi|350583998	PREDICTED: hypothetical protein LOC100157304 [Sus scrofa]	86	6	2	53583	7	1	0	573.395	572.388	1	572.328	0.0599	0	14.66	30	37	11	K	VDALR	D
46	gi|350583998	PREDICTED: hypothetical protein LOC100157304 [Sus scrofa]	86	6	2	129253	1	0	0	541.385	1080.76	2	1081.59	-0.8358	1	35.52	27	34	0.043	K	FASFIDKVR	F
46	gi|350583998	PREDICTED: hypothetical protein LOC100157304 [Sus scrofa]	86	6	2	129267	1	0	0	541.406	1080.8	2	1081.59	-0.795	1	38.41	30	34	0.022	K	FASFIDKVR	F
46	gi|350583998	PREDICTED: hypothetical protein LOC100157304 [Sus scrofa]	86	6	2	130387	3	0	0	363.379	1087.11	3	1086.6	0.5107	1	17.76	31	34	2.2	R	EQIKTLNNK	F
46	gi|350583998	PREDICTED: hypothetical protein LOC100157304 [Sus scrofa]	86	6	2	130412	8	0	0	363.408	1087.2	3	1086.6	0.5992	1	14.77	34	35	5.7	R	EQIKTLNNK	F
46	gi|350583998	PREDICTED: hypothetical protein LOC100157304 [Sus scrofa]	86	6	2	146351	2	0	0	585.972	1169.93	2	1169.54	0.3902	1	13.38	27	34	6.9	K	KDVDAAYMNK	V	Oxidation (M)	0.0000000100.0
46	gi|350583998	PREDICTED: hypothetical protein LOC100157304 [Sus scrofa]	86	6	2	163061	2	0	0	627.7	1253.39	2	1253.56	-0.1738	0	15.97	30	34	3.6	R	NMQDLVEDFK	K	Oxidation (M)	0.0100000000.0
46	gi|350583998	PREDICTED: hypothetical protein LOC100157304 [Sus scrofa]	86	6	2	207483	4	0	0	738.357	1474.7	2	1475.8	-1.0989	1	36.74		34	0.028	R	FLEQQNKVLETK	W
46	gi|350583998	PREDICTED: hypothetical protein LOC100157304 [Sus scrofa]	86	6	2	207549	3	0	0	738.577	1475.14	2	1475.8	-0.6595	1	42.91		33	0.0058	R	FLEQQNKVLETK	W
46	gi|350583998	PREDICTED: hypothetical protein LOC100157304 [Sus scrofa]	86	6	2	207550	3	0	0	738.577	1475.14	2	1475.8	-0.6591	1	44.44		33	0.0041	R	FLEQQNKVLETK	W
46	gi|350583998	PREDICTED: hypothetical protein LOC100157304 [Sus scrofa]	86	6	2	207694	3	0	0	739.077	1476.14	2	1475.8	0.3413	1	46.41		33	0.0027	R	FLEQQNKVLETK	W
46	gi|350583998	PREDICTED: hypothetical protein LOC100157304 [Sus scrofa]	86	6	2	207812	1	0	0	739.37	1476.73	2	1475.8	0.9273	1	13.29	22	34	6.5	R	FLEQQNKVLETK	W
46	gi|350583998	PREDICTED: hypothetical protein LOC100157304 [Sus scrofa]	86	6	2	232017	3	1	1	538.877	1613.61	3	1614.83	-1.2236	1	13.81	30	33	5	K	QSAKLQTAVADAEQR	G
46	gi|350583998	PREDICTED: hypothetical protein LOC100157304 [Sus scrofa]	86	6	2	232031	1	1	1	538.929	1613.77	3	1614.83	-1.0661	1	14.57	26	33	4.2	K	QSAKLQTAVADAEQR	G
46	gi|350583998	PREDICTED: hypothetical protein LOC100157304 [Sus scrofa]	86	6	2	290619	1	1	1	674.614	2020.82	3	2020.97	-0.1488	1	13.57	14	32	4.2	K	TSGGRSQGFSGHSAVISGSSR	M			emPAI	0.1
47	gi|311255411	PREDICTED: LOW QUALITY PROTEIN: keratin, type II cytoskeletal 4 [Sus scrofa]	86	6	2	92666	6	1	1	426.524	851.034	2	850.455	0.5794	0	14.47	31	34	4.7	R	SLYNLGGK	K
47	gi|311255411	PREDICTED: LOW QUALITY PROTEIN: keratin, type II cytoskeletal 4 [Sus scrofa]	86	6	2	129253	1	0	0	541.385	1080.76	2	1081.59	-0.8358	1	35.52	27	34	0.043	K	FASFIDKVR	F
47	gi|311255411	PREDICTED: LOW QUALITY PROTEIN: keratin, type II cytoskeletal 4 [Sus scrofa]	86	6	2	129267	1	0	0	541.406	1080.8	2	1081.59	-0.795	1	38.41	30	34	0.022	K	FASFIDKVR	F
47	gi|311255411	PREDICTED: LOW QUALITY PROTEIN: keratin, type II cytoskeletal 4 [Sus scrofa]	86	6	2	142574	1	1	1	384.885	1151.63	3	1151.58	0.0522	1	13.84	24	34	6.5	R	GEAALKDAYSK	R
47	gi|311255411	PREDICTED: LOW QUALITY PROTEIN: keratin, type II cytoskeletal 4 [Sus scrofa]	86	6	2	142638	1	1	1	384.952	1151.83	3	1151.58	0.2514	1	13.55	25	34	7	R	GEAALKDAYSK	R
47	gi|311255411	PREDICTED: LOW QUALITY PROTEIN: keratin, type II cytoskeletal 4 [Sus scrofa]	86	6	2	142655	1	1	1	384.962	1151.86	3	1151.58	0.2814	1	22.03	26	34	0.98	R	GEAALKDAYSK	R
47	gi|311255411	PREDICTED: LOW QUALITY PROTEIN: keratin, type II cytoskeletal 4 [Sus scrofa]	86	6	2	142688	1	1	1	384.988	1151.94	3	1151.58	0.3612	1	14.17	24	34	5.6	R	GEAALKDAYSK	R
47	gi|311255411	PREDICTED: LOW QUALITY PROTEIN: keratin, type II cytoskeletal 4 [Sus scrofa]	86	6	2	142739	1	1	1	385.035	1152.08	3	1151.58	0.5004	1	23.14	27	33	0.52	R	GEAALKDAYSK	R
47	gi|311255411	PREDICTED: LOW QUALITY PROTEIN: keratin, type II cytoskeletal 4 [Sus scrofa]	86	6	2	146351	2	0	0	585.972	1169.93	2	1169.54	0.3902	1	13.38	27	34	6.9	K	KDVDAAYMNK	V	Oxidation (M)	0.0000000100.0
47	gi|311255411	PREDICTED: LOW QUALITY PROTEIN: keratin, type II cytoskeletal 4 [Sus scrofa]	86	6	2	183941	1	0	0	679.556	1357.1	2	1357.71	-0.612	0	24.79		33	0.41	R	DLDLDSIIAEVR	A
47	gi|311255411	PREDICTED: LOW QUALITY PROTEIN: keratin, type II cytoskeletal 4 [Sus scrofa]	86	6	2	207483	4	0	0	738.357	1474.7	2	1475.8	-1.0989	1	36.74		34	0.028	R	FLEQQNKVLETK	W
47	gi|311255411	PREDICTED: LOW QUALITY PROTEIN: keratin, type II cytoskeletal 4 [Sus scrofa]	86	6	2	207549	3	0	0	738.577	1475.14	2	1475.8	-0.6595	1	42.91		33	0.0058	R	FLEQQNKVLETK	W
47	gi|311255411	PREDICTED: LOW QUALITY PROTEIN: keratin, type II cytoskeletal 4 [Sus scrofa]	86	6	2	207550	3	0	0	738.577	1475.14	2	1475.8	-0.6591	1	44.44		33	0.0041	R	FLEQQNKVLETK	W
47	gi|311255411	PREDICTED: LOW QUALITY PROTEIN: keratin, type II cytoskeletal 4 [Sus scrofa]	86	6	2	207694	3	0	0	739.077	1476.14	2	1475.8	0.3413	1	46.41		33	0.0027	R	FLEQQNKVLETK	W
47	gi|311255411	PREDICTED: LOW QUALITY PROTEIN: keratin, type II cytoskeletal 4 [Sus scrofa]	86	6	2	207812	1	0	0	739.37	1476.73	2	1475.8	0.9273	1	13.29	22	34	6.5	R	FLEQQNKVLETK	W			emPAI	0.1
49	gi|346421372	ferritin, light polypeptide [Sus scrofa]	77	4	2	53975	1	1	1	577.423	576.415	1	576.25	0.1652	0	13.52	26	36	9.6	R	EGSER	L
49	gi|346421372	ferritin, light polypeptide [Sus scrofa]	77	4	2	154467	1	1	1	405.156	1212.45	3	1211.62	0.8263	1	21.22	26	34	1.1	K	MGDHLTNLRR	L
49	gi|346421372	ferritin, light polypeptide [Sus scrofa]	77	4	2	235475	1	1	1	545.824	1634.45	3	1633.89	0.5611	0	36.28	22	33	0.025	K	GLNQALVDLHALGSAR	A
49	gi|346421372	ferritin, light polypeptide [Sus scrofa]	77	4	2	235486	1	1	1	545.885	1634.63	3	1633.89	0.7429	0	43.27	24	33	0.0055	K	GLNQALVDLHALGSAR	A
49	gi|346421372	ferritin, light polypeptide [Sus scrofa]	77	4	2	235524	1	1	1	546.048	1635.12	3	1633.89	1.2319	0	41.3	32	33	0.0086	K	GLNQALVDLHALGSAR	A
49	gi|346421372	ferritin, light polypeptide [Sus scrofa]	77	4	2	235634	1	1	1	818.974	1635.93	2	1635.83	0.1074	0	34.88	27	33	0.039	R	LSGPQAGLGEYLFER	L			emPAI	0.36
50	gi|47523546	myoglobin [Sus scrofa]	76	3	2	78723	3	1	1	748.351	747.344	1	747.428	-0.0841	0	16.85	34	36	4.7	K	ALELFR	N
50	gi|47523546	myoglobin [Sus scrofa]	76	3	2	78728	3	1	1	748.426	747.419	1	747.428	-0.0089	0	17	34	36	4.6	K	ALELFR	N
50	gi|47523546	myoglobin [Sus scrofa]	76	3	2	78734	1	1	1	374.861	747.707	2	747.428	0.2789	0	31.45		36	0.16	K	ALELFR	N
50	gi|47523546	myoglobin [Sus scrofa]	76	3	2	78736	1	1	1	374.888	747.762	2	747.428	0.3339	0	38.17		36	0.032	K	ALELFR	N
50	gi|47523546	myoglobin [Sus scrofa]	76	3	2	78738	1	1	1	374.929	747.844	2	747.428	0.4157	0	28.07		34	0.24	K	ALELFR	N
50	gi|47523546	myoglobin [Sus scrofa]	76	3	2	78741	1	1	1	374.95	747.885	2	747.428	0.4567	0	33.51		34	0.065	K	ALELFR	N
50	gi|47523546	myoglobin [Sus scrofa]	76	3	2	104687	1	1	1	470.709	939.404	2	940.465	-1.061	1	19.41	21	34	1.8	K	YKELGFQG	-
50	gi|47523546	myoglobin [Sus scrofa]	76	3	2	104828	1	1	1	470.906	939.798	2	940.465	-0.6674	1	28.87	17	34	0.2	K	YKELGFQG	-
50	gi|47523546	myoglobin [Sus scrofa]	76	3	2	104865	1	1	1	941.117	940.109	1	940.465	-0.3561	1	37.17	18	34	0.025	K	YKELGFQG	-
50	gi|47523546	myoglobin [Sus scrofa]	76	3	2	104880	1	1	1	941.28	940.272	1	940.465	-0.193	1	38.05	18	34	0.025	K	YKELGFQG	-
50	gi|47523546	myoglobin [Sus scrofa]	76	3	2	172853	2	1	1	650.13	1298.25	2	1297.7	0.5428	1	25.22		33	0.34	R	LFKGHPETLEK	F
50	gi|47523546	myoglobin [Sus scrofa]	76	3	2	172861	1	1	1	650.148	1298.28	2	1297.7	0.578	1	15.68	28	34	3.4	R	LFKGHPETLEK	F			emPAI	0.72
57	gi|350585167	PREDICTED: LOW QUALITY PROTEIN: zinc finger protein 345-like [Sus scrofa]	68	12	2	106725	1	1	1	317.255	948.742	3	949.548	-0.8064	0	13.66	26	35	8.3	R	SLTELFLK	K
57	gi|350585167	PREDICTED: LOW QUALITY PROTEIN: zinc finger protein 345-like [Sus scrofa]	68	12	2	106885	1	1	1	475.85	949.685	2	949.548	0.1362	0	29.66	33	35	0.2	R	SLTELFLK	K
57	gi|350585167	PREDICTED: LOW QUALITY PROTEIN: zinc finger protein 345-like [Sus scrofa]	68	12	2	106887	1	1	1	475.866	949.717	2	949.548	0.1682	0	30.19		35	0.18	R	SLTELFLK	K
57	gi|350585167	PREDICTED: LOW QUALITY PROTEIN: zinc finger protein 345-like [Sus scrofa]	68	12	2	106904	1	1	1	475.944	949.874	2	949.548	0.3258	0	32.68		35	0.086	R	SLTELFLK	K
57	gi|350585167	PREDICTED: LOW QUALITY PROTEIN: zinc finger protein 345-like [Sus scrofa]	68	12	2	106912	1	1	1	475.974	949.934	2	949.548	0.3858	0	17.51	29	34	2.4	R	SLTELFLK	K
57	gi|350585167	PREDICTED: LOW QUALITY PROTEIN: zinc finger protein 345-like [Sus scrofa]	68	12	2	106915	1	1	1	475.988	949.962	2	949.548	0.4134	0	26.39	29	34	0.29	R	SLTELFLK	K
57	gi|350585167	PREDICTED: LOW QUALITY PROTEIN: zinc finger protein 345-like [Sus scrofa]	68	12	2	106920	1	1	1	475.997	949.98	2	949.548	0.4312	0	29.85		33	0.13	R	SLTELFLK	K
57	gi|350585167	PREDICTED: LOW QUALITY PROTEIN: zinc finger protein 345-like [Sus scrofa]	68	12	2	106935	1	1	1	476.018	950.021	2	949.548	0.4726	0	35.62		34	0.035	R	SLTELFLK	K
57	gi|350585167	PREDICTED: LOW QUALITY PROTEIN: zinc finger protein 345-like [Sus scrofa]	68	12	2	106938	1	1	1	476.022	950.029	2	949.548	0.481	0	25		34	0.41	R	SLTELFLK	K
57	gi|350585167	PREDICTED: LOW QUALITY PROTEIN: zinc finger protein 345-like [Sus scrofa]	68	12	2	106948	1	1	1	476.051	950.087	2	949.548	0.5386	0	19.44	26	34	1.7	R	SLTELFLK	K
57	gi|350585167	PREDICTED: LOW QUALITY PROTEIN: zinc finger protein 345-like [Sus scrofa]	68	12	2	128603	1	1	1	539.476	1076.94	2	1077.64	-0.7051	1	16.3	28	34	3.6	R	SLTELFLKK	N
57	gi|350585167	PREDICTED: LOW QUALITY PROTEIN: zinc finger protein 345-like [Sus scrofa]	68	12	2	128625	1	1	1	539.578	1077.14	2	1077.64	-0.5015	1	19.81	32	34	1.5	R	SLTELFLKK	N
57	gi|350585167	PREDICTED: LOW QUALITY PROTEIN: zinc finger protein 345-like [Sus scrofa]	68	12	2	128634	1	1	1	539.606	1077.2	2	1077.64	-0.4467	1	16.79	27	34	3.3	R	SLTELFLKK	N
57	gi|350585167	PREDICTED: LOW QUALITY PROTEIN: zinc finger protein 345-like [Sus scrofa]	68	12	2	128647	5	1	1	1078.29	1077.28	1	1077.64	-0.3636	1	17.76		35	2.8	R	SLTELFLKK	N
57	gi|350585167	PREDICTED: LOW QUALITY PROTEIN: zinc finger protein 345-like [Sus scrofa]	68	12	2	128656	2	1	1	1078.35	1077.34	1	1077.64	-0.3046	1	18.56	32	35	2.3	R	SLTELFLKK	N
57	gi|350585167	PREDICTED: LOW QUALITY PROTEIN: zinc finger protein 345-like [Sus scrofa]	68	12	2	128658	5	1	1	1078.38	1077.37	1	1077.64	-0.2726	1	19.9		35	1.7	R	SLTELFLKK	N
57	gi|350585167	PREDICTED: LOW QUALITY PROTEIN: zinc finger protein 345-like [Sus scrofa]	68	12	2	128660	5	1	1	1078.38	1077.38	1	1077.64	-0.2656	1	17.16		35	3.2	R	SLTELFLKK	N
57	gi|350585167	PREDICTED: LOW QUALITY PROTEIN: zinc finger protein 345-like [Sus scrofa]	68	12	2	128663	5	1	1	1078.41	1077.4	1	1077.64	-0.2426	1	18.71		35	2.2	R	SLTELFLKK	N
57	gi|350585167	PREDICTED: LOW QUALITY PROTEIN: zinc finger protein 345-like [Sus scrofa]	68	12	2	128665	5	1	1	1078.41	1077.41	1	1077.64	-0.2366	1	18.91		35	2.1	R	SLTELFLKK	N
57	gi|350585167	PREDICTED: LOW QUALITY PROTEIN: zinc finger protein 345-like [Sus scrofa]	68	12	2	128670	5	1	1	1078.45	1077.44	1	1077.64	-0.2006	1	18.89		35	2.2	R	SLTELFLKK	N
57	gi|350585167	PREDICTED: LOW QUALITY PROTEIN: zinc finger protein 345-like [Sus scrofa]	68	12	2	128674	3	1	1	1078.46	1077.45	1	1077.64	-0.1926	1	18.48	34	35	2.4	R	SLTELFLKK	N
57	gi|350585167	PREDICTED: LOW QUALITY PROTEIN: zinc finger protein 345-like [Sus scrofa]	68	12	2	128675	2	1	1	1078.47	1077.46	1	1077.64	-0.1836	1	18.79	33	35	2.2	R	SLTELFLKK	N
57	gi|350585167	PREDICTED: LOW QUALITY PROTEIN: zinc finger protein 345-like [Sus scrofa]	68	12	2	128681	1	1	1	539.757	1077.5	2	1077.64	-0.1445	1	37.36		35	0.031	R	SLTELFLKK	N
57	gi|350585167	PREDICTED: LOW QUALITY PROTEIN: zinc finger protein 345-like [Sus scrofa]	68	12	2	128682	5	1	1	1078.51	1077.5	1	1077.64	-0.1406	1	18.69		35	2.3	R	SLTELFLKK	N
57	gi|350585167	PREDICTED: LOW QUALITY PROTEIN: zinc finger protein 345-like [Sus scrofa]	68	12	2	128687	1	1	1	539.767	1077.52	2	1077.64	-0.1235	1	23.66	34	35	0.72	R	SLTELFLKK	N
57	gi|350585167	PREDICTED: LOW QUALITY PROTEIN: zinc finger protein 345-like [Sus scrofa]	68	12	2	128691	1	1	1	539.778	1077.54	2	1077.64	-0.1011	1	29.59		35	0.18	R	SLTELFLKK	N
57	gi|350585167	PREDICTED: LOW QUALITY PROTEIN: zinc finger protein 345-like [Sus scrofa]	68	12	2	128698	1	1	1	539.801	1077.59	2	1077.64	-0.0561	1	27.62	33	35	0.29	R	SLTELFLKK	N
57	gi|350585167	PREDICTED: LOW QUALITY PROTEIN: zinc finger protein 345-like [Sus scrofa]	68	12	2	128704	1	1	1	539.846	1077.68	2	1077.64	0.0343	1	39.17		35	0.02	R	SLTELFLKK	N
57	gi|350585167	PREDICTED: LOW QUALITY PROTEIN: zinc finger protein 345-like [Sus scrofa]	68	12	2	128705	4	1	1	539.848	1077.68	2	1077.64	0.0391	1	19.34		35	1.9	R	SLTELFLKK	N
57	gi|350585167	PREDICTED: LOW QUALITY PROTEIN: zinc finger protein 345-like [Sus scrofa]	68	12	2	128708	1	1	1	539.866	1077.72	2	1077.64	0.0747	1	36.92		35	0.034	R	SLTELFLKK	N
57	gi|350585167	PREDICTED: LOW QUALITY PROTEIN: zinc finger protein 345-like [Sus scrofa]	68	12	2	128724	1	1	1	539.946	1077.88	2	1077.64	0.2345	1	33.5		35	0.072	R	SLTELFLKK	N
57	gi|350585167	PREDICTED: LOW QUALITY PROTEIN: zinc finger protein 345-like [Sus scrofa]	68	12	2	128737	1	1	1	540.01	1078.01	2	1077.64	0.3617	1	36.71		33	0.025	R	SLTELFLKK	N
57	gi|350585167	PREDICTED: LOW QUALITY PROTEIN: zinc finger protein 345-like [Sus scrofa]	68	12	2	128739	1	1	1	540.011	1078.01	2	1077.64	0.3643	1	34.85		33	0.038	R	SLTELFLKK	N
57	gi|350585167	PREDICTED: LOW QUALITY PROTEIN: zinc finger protein 345-like [Sus scrofa]	68	12	2	128740	1	1	1	540.014	1078.01	2	1077.64	0.3701	1	34.69		33	0.039	R	SLTELFLKK	N
57	gi|350585167	PREDICTED: LOW QUALITY PROTEIN: zinc finger protein 345-like [Sus scrofa]	68	12	2	128742	2	1	1	540.015	1078.02	2	1077.64	0.3721	1	13.7	26	33	4.9	R	SLTELFLKK	N
57	gi|350585167	PREDICTED: LOW QUALITY PROTEIN: zinc finger protein 345-like [Sus scrofa]	68	12	2	128743	1	1	1	540.02	1078.03	2	1077.64	0.3827	1	38.75		33	0.015	R	SLTELFLKK	N
57	gi|350585167	PREDICTED: LOW QUALITY PROTEIN: zinc finger protein 345-like [Sus scrofa]	68	12	2	128744	1	1	1	540.021	1078.03	2	1077.64	0.3851	1	34.27		33	0.043	R	SLTELFLKK	N
57	gi|350585167	PREDICTED: LOW QUALITY PROTEIN: zinc finger protein 345-like [Sus scrofa]	68	12	2	128746	1	1	1	540.042	1078.07	2	1077.64	0.4267	1	37.13		33	0.022	R	SLTELFLKK	N
57	gi|350585167	PREDICTED: LOW QUALITY PROTEIN: zinc finger protein 345-like [Sus scrofa]	68	12	2	128752	1	1	1	540.053	1078.09	2	1077.64	0.4487	1	37.11		33	0.023	R	SLTELFLKK	N
57	gi|350585167	PREDICTED: LOW QUALITY PROTEIN: zinc finger protein 345-like [Sus scrofa]	68	12	2	128754	1	1	1	540.062	1078.11	2	1077.64	0.4663	1	34.88		33	0.04	R	SLTELFLKK	N
57	gi|350585167	PREDICTED: LOW QUALITY PROTEIN: zinc finger protein 345-like [Sus scrofa]	68	12	2	128755	1	1	1	540.062	1078.11	2	1077.64	0.4663	1	27.03		33	0.24	R	SLTELFLKK	N
57	gi|350585167	PREDICTED: LOW QUALITY PROTEIN: zinc finger protein 345-like [Sus scrofa]	68	12	2	128766	1	1	1	540.1	1078.18	2	1077.64	0.5413	1	31.67		34	0.1	R	SLTELFLKK	N
57	gi|350585167	PREDICTED: LOW QUALITY PROTEIN: zinc finger protein 345-like [Sus scrofa]	68	12	2	128767	1	1	1	540.1	1078.19	2	1077.64	0.5425	1	23.94	33	34	0.6	R	SLTELFLKK	N
57	gi|350585167	PREDICTED: LOW QUALITY PROTEIN: zinc finger protein 345-like [Sus scrofa]	68	12	2	128782	6	1	1	540.124	1078.23	2	1077.64	0.5899	1	13.81	27	34	6.5	R	SLTELFLKK	N
57	gi|350585167	PREDICTED: LOW QUALITY PROTEIN: zinc finger protein 345-like [Sus scrofa]	68	12	2	128786	5	1	1	540.141	1078.27	2	1077.64	0.6239	1	13.24	33	35	7.6	R	SLTELFLKK	N
57	gi|350585167	PREDICTED: LOW QUALITY PROTEIN: zinc finger protein 345-like [Sus scrofa]	68	12	2	128790	5	1	1	1079.31	1078.3	1	1077.64	0.6554	1	14.03	34	35	6.4	R	SLTELFLKK	N
57	gi|350585167	PREDICTED: LOW QUALITY PROTEIN: zinc finger protein 345-like [Sus scrofa]	68	12	2	128794	1	1	1	540.159	1078.3	2	1077.64	0.6607	1	27.67		35	0.27	R	SLTELFLKK	N
57	gi|350585167	PREDICTED: LOW QUALITY PROTEIN: zinc finger protein 345-like [Sus scrofa]	68	12	2	128796	1	1	1	540.17	1078.33	2	1077.64	0.6825	1	29.66	35	35	0.17	R	SLTELFLKK	N
57	gi|350585167	PREDICTED: LOW QUALITY PROTEIN: zinc finger protein 345-like [Sus scrofa]	68	12	2	128799	1	1	1	540.186	1078.36	2	1077.64	0.7141	1	23.75	31	35	0.68	R	SLTELFLKK	N
57	gi|350585167	PREDICTED: LOW QUALITY PROTEIN: zinc finger protein 345-like [Sus scrofa]	68	12	2	128805	1	1	1	540.199	1078.38	2	1077.64	0.7409	1	20.07	30	35	1.6	R	SLTELFLKK	N
57	gi|350585167	PREDICTED: LOW QUALITY PROTEIN: zinc finger protein 345-like [Sus scrofa]	68	12	2	128806	5	1	1	1079.4	1078.39	1	1077.64	0.7494	1	15.92	30	35	4.1	R	SLTELFLKK	N
57	gi|350585167	PREDICTED: LOW QUALITY PROTEIN: zinc finger protein 345-like [Sus scrofa]	68	12	2	128831	3	1	1	540.303	1078.59	2	1077.64	0.9489	1	13.38	31	35	7.4	R	SLTELFLKK	N
57	gi|350585167	PREDICTED: LOW QUALITY PROTEIN: zinc finger protein 345-like [Sus scrofa]	68	12	2	216892	2	1	1	510.123	1527.35	3	1527.75	-0.4032	1	14.29	28	32	3.7	K	ECGKAFSFGSGLIR	H			emPAI	0.1
61	gi|311261653	PREDICTED: protein KIAA0284-like [Sus scrofa]	64	6	2	44843	1	1	0	513.306	512.298	1	512.307	-0.0085	0	14.29	24	33	3.7	R	APGLR	D
61	gi|311261653	PREDICTED: protein KIAA0284-like [Sus scrofa]	64	6	2	74882	5	1	1	358.45	714.884	2	714.402	0.482	0	25.84		35	0.42	K	EALGLGR	Q
61	gi|311261653	PREDICTED: protein KIAA0284-like [Sus scrofa]	64	6	2	79598	2	0	1	378.675	755.334	2	756.449	-1.1149	0	35.15		35	0.051	K	DVAILAR	E
61	gi|311261653	PREDICTED: protein KIAA0284-like [Sus scrofa]	64	6	2	79618	1	0	1	378.86	755.706	2	756.449	-0.7431	0	42.57		35	0.0091	K	DVAILAR	E
61	gi|311261653	PREDICTED: protein KIAA0284-like [Sus scrofa]	64	6	2	79622	2	0	1	378.88	755.746	2	756.449	-0.7037	0	38.9		35	0.021	K	DVAILAR	E
61	gi|311261653	PREDICTED: protein KIAA0284-like [Sus scrofa]	64	6	2	79628	2	0	1	378.893	755.772	2	756.449	-0.6777	0	38.6		34	0.021	K	DVAILAR	E
61	gi|311261653	PREDICTED: protein KIAA0284-like [Sus scrofa]	64	6	2	127865	3	1	1	537.264	1072.51	2	1072.48	0.0347	0	16.34	31	35	4.4	R	DEPSDGVAQR	M
61	gi|311261653	PREDICTED: protein KIAA0284-like [Sus scrofa]	64	6	2	127889	2	1	1	537.323	1072.63	2	1072.48	0.1531	0	22.05		35	1.2	R	DEPSDGVAQR	M
61	gi|311261653	PREDICTED: protein KIAA0284-like [Sus scrofa]	64	6	2	127917	3	1	1	537.367	1072.72	2	1072.48	0.2413	0	18.11	32	35	2.9	R	DEPSDGVAQR	M
61	gi|311261653	PREDICTED: protein KIAA0284-like [Sus scrofa]	64	6	2	127924	5	1	1	537.375	1072.74	2	1072.48	0.2569	0	14.56	31	35	6.6	R	DEPSDGVAQR	M
61	gi|311261653	PREDICTED: protein KIAA0284-like [Sus scrofa]	64	6	2	127934	3	1	1	537.391	1072.77	2	1072.48	0.2897	0	16.71	31	35	4	R	DEPSDGVAQR	M
61	gi|311261653	PREDICTED: protein KIAA0284-like [Sus scrofa]	64	6	2	127950	5	1	1	537.428	1072.84	2	1072.48	0.3633	0	16.46		35	4.2	R	DEPSDGVAQR	M
61	gi|311261653	PREDICTED: protein KIAA0284-like [Sus scrofa]	64	6	2	127957	4	1	1	537.441	1072.87	2	1072.48	0.3887	0	16.5	31	35	4.1	R	DEPSDGVAQR	M
61	gi|311261653	PREDICTED: protein KIAA0284-like [Sus scrofa]	64	6	2	127968	4	1	1	537.483	1072.95	2	1072.48	0.4723	0	17.33	32	35	3	R	DEPSDGVAQR	M
61	gi|311261653	PREDICTED: protein KIAA0284-like [Sus scrofa]	64	6	2	127971	10	1	1	537.494	1072.97	2	1072.48	0.4945	0	14.56		34	5.2	R	DEPSDGVAQR	M
61	gi|311261653	PREDICTED: protein KIAA0284-like [Sus scrofa]	64	6	2	127978	9	0	1	537.518	1073.02	2	1072.48	0.5427	0	15.51	32	34	3.7	R	DEPSDGVAQR	M
61	gi|311261653	PREDICTED: protein KIAA0284-like [Sus scrofa]	64	6	2	148839	5	1	1	1186.41	1185.4	1	1186.69	-1.2874	1	19.22	33	35	2	K	EISSILKELR	R
61	gi|311261653	PREDICTED: protein KIAA0284-like [Sus scrofa]	64	6	2	148885	1	1	1	594.054	1186.09	2	1186.69	-0.5994	1	42.67		33	0.0063	K	EISSILKELR	R
61	gi|311261653	PREDICTED: protein KIAA0284-like [Sus scrofa]	64	6	2	148890	1	1	1	594.073	1186.13	2	1186.69	-0.561	1	31.56		33	0.081	K	EISSILKELR	R
61	gi|311261653	PREDICTED: protein KIAA0284-like [Sus scrofa]	64	6	2	148896	1	1	1	594.099	1186.18	2	1186.69	-0.5088	1	31.51	32	34	0.09	K	EISSILKELR	R
61	gi|311261653	PREDICTED: protein KIAA0284-like [Sus scrofa]	64	6	2	148946	1	1	1	1187.45	1186.44	1	1186.69	-0.2514	1	18.04	30	35	2.6	K	EISSILKELR	R
61	gi|311261653	PREDICTED: protein KIAA0284-like [Sus scrofa]	64	6	2	149126	1	1	1	594.497	1186.98	2	1186.69	0.2878	1	18.87	26	34	1.9	K	EISSILKELR	R
61	gi|311261653	PREDICTED: protein KIAA0284-like [Sus scrofa]	64	6	2	149148	1	1	1	594.539	1187.06	2	1186.69	0.3708	1	35.89	32	33	0.031	K	EISSILKELR	R
61	gi|311261653	PREDICTED: protein KIAA0284-like [Sus scrofa]	64	6	2	149172	1	1	1	594.572	1187.13	2	1186.69	0.4364	1	21.7	22	33	0.77	K	EISSILKELR	R
61	gi|311261653	PREDICTED: protein KIAA0284-like [Sus scrofa]	64	6	2	149173	1	1	1	594.573	1187.13	2	1186.69	0.4392	1	17.67	23	33	2	K	EISSILKELR	R
61	gi|311261653	PREDICTED: protein KIAA0284-like [Sus scrofa]	64	6	2	178343	1	1	1	444.257	1329.75	3	1329.67	0.0821	0	18.38	26	34	2.2	R	TPEVPPHEAPTR	D			emPAI	0.04
107	gi|350591252	PREDICTED: RNA-binding protein 5 [Sus scrofa]	43	2	2	67031	1	1	0	338.114	674.213	2	674.335	-0.1219	0	27.38	30	37	0.5	R	EGSGLGR	K
107	gi|350591252	PREDICTED: RNA-binding protein 5 [Sus scrofa]	43	2	2	67035	1	1	0	338.144	674.273	2	674.335	-0.0621	0	29.93	32	37	0.28	R	EGSGLGR	K
107	gi|350591252	PREDICTED: RNA-binding protein 5 [Sus scrofa]	43	2	2	67046	2	1	0	675.338	674.331	1	674.335	-0.0039	0	13.08	26	37	14	R	EGSGLGR	K
107	gi|350591252	PREDICTED: RNA-binding protein 5 [Sus scrofa]	43	2	2	67064	1	1	0	338.353	674.691	2	674.335	0.3565	0	38.39		37	0.04	R	EGSGLGR	K
107	gi|350591252	PREDICTED: RNA-binding protein 5 [Sus scrofa]	43	2	2	67065	1	1	0	338.377	674.739	2	674.335	0.4043	0	31.6	34	37	0.18	R	EGSGLGR	K
107	gi|350591252	PREDICTED: RNA-binding protein 5 [Sus scrofa]	43	2	2	67069	4	1	0	338.543	675.072	2	674.335	0.7377	0	13.97	28	36	9.8	R	EGSGLGR	K
107	gi|350591252	PREDICTED: RNA-binding protein 5 [Sus scrofa]	43	2	2	89450	1	1	1	411.722	821.43	2	822.424	-0.9937	0	15.7	23	35	4.8	R	YGSIIDR	D
107	gi|350591252	PREDICTED: RNA-binding protein 5 [Sus scrofa]	43	2	2	89451	1	1	1	411.74	821.465	2	822.424	-0.9589	0	15.6	23	35	4.9	R	YGSIIDR	D
107	gi|350591252	PREDICTED: RNA-binding protein 5 [Sus scrofa]	43	2	2	89453	1	1	1	411.756	821.498	2	822.424	-0.9255	0	14.65	22	35	6.1	R	YGSIIDR	D
107	gi|350591252	PREDICTED: RNA-binding protein 5 [Sus scrofa]	43	2	2	89608	2	1	1	412.338	822.662	2	822.424	0.2381	0	14.81	29	35	5.4	R	YGSIIDR	D
107	gi|350591252	PREDICTED: RNA-binding protein 5 [Sus scrofa]	43	2	2	89655	2	1	1	412.5	822.986	2	822.424	0.5621	0	15.53	29	33	3.3	R	YGSIIDR	D
107	gi|350591252	PREDICTED: RNA-binding protein 5 [Sus scrofa]	43	2	2	95950	1	1	1	436.825	871.635	2	870.383	1.2517	0	13.6	26	36	8.8	R	HDISDER	E
107	gi|350591252	PREDICTED: RNA-binding protein 5 [Sus scrofa]	43	2	2	146579	1	1	1	586.527	1171.04	2	1170.56	0.4764	1	40.05		34	0.013	R	NGDEENPLKR	G
107	gi|350591252	PREDICTED: RNA-binding protein 5 [Sus scrofa]	43	2	2	146584	1	1	1	586.55	1171.09	2	1170.56	0.5222	1	26.01		33	0.3	R	NGDEENPLKR	G			emPAI	0.07

## Sheet: invivo_EHEC_100324_Protein
Prot ID	Accession	Description	Mascot Score	# PSMs	# Peptides	Pr Coverage	Pr Length	MW (kDa)	pI
1	gi|242253868	trypsinogen precursor [Sus scrofa]	2017	51	3	23.6	246	26549	6.85
2	gi|335292694	PREDICTED: heat shock-related 70 kDa protein 2-like [Sus scrofa]	792	17	1	7.5	636	70065	5.51
3	gi|350579657	PREDICTED: 78 kDa glucose-regulated protein [Sus scrofa]	792	17	1	4.7	659	73167	5.43
4	gi|335309396	PREDICTED: adenylate kinase 2, mitochondrial-like isoform 1 [Sus scrofa]	540	17	1	13.2	228	25328	6.24
5	gi|350583977	PREDICTED: keratin, type II cytoskeletal 1 [Sus scrofa]	408	14	4	8.1	629	65381	8.18
6	gi|311252272	PREDICTED: lithostathine-like isoform 1 [Sus scrofa]	282	10	4	23.9	176	19853	5.3
7	gi|211578396	uncharacterized protein LOC100156145 [Sus scrofa]	263	4	1	7	457	50768	8.54
8	gi|114703738	deleted in malignant brain tumors 1 protein precursor [Sus scrofa]	244	8	3	3	1349	151127	5.42
9	gi|329744642	glyceraldehyde-3-phosphate dehydrogenase [Sus scrofa]	212	21	3	9.6	333	36041	8.51
10	gi|148747492	keratin, type II cytoskeletal 2 epidermal [Sus scrofa]	210	6	2	9.3	642	66510	7.47
11	gi|335289549	PREDICTED: glyceraldehyde-3-phosphate dehydrogenase, testis-specific-like [Sus scrofa]	201	19	2	8.8	397	43498	8.3
12	gi|343478295	trefoil factor 3 (intestinal) precursor [Sus scrofa]	141	4	1	20	80	9131	4.55
13	gi|346421372	ferritin, light polypeptide [Sus scrofa]	140	5	3	35.4	175	20165	5.75
17	gi|350580796	PREDICTED: hypothetical protein LOC100522363 [Sus scrofa]	118	3	3	14.9	576	60839	11.55
18	gi|194038855	PREDICTED: hypothetical protein LOC100154068 [Sus scrofa]	117	2	1	8.3	348	38394	6.8
19	gi|47523036	tyrosine-protein kinase JAK1 [Sus scrofa]	115	3	1	3.4	1141	133305	7.48
20	gi|350583970	PREDICTED: keratin, type II cytoskeletal 75-like [Sus scrofa]	115	9	3	11.3	551	59845	8.45
21	gi|194037336	PREDICTED: keratin, type II cytoskeletal 1b [Sus scrofa]	111	5	2	5.5	595	63962	5.75
22	gi|350584000	PREDICTED: keratin, type II cytoskeletal 78-like [Sus scrofa]	103	4	1	5.8	394	42842	9.23
28	gi|350593858	PREDICTED: carbamoyl-phosphate synthase [ammonia], mitochondrial isoform 1 [Sus scrofa]	89	2	1	4.3	1648	182096	5.94
29	gi|350579257	PREDICTED: glycine dehydrogenase [decarboxylating], mitochondrial-like [Sus scrofa]	89	2	1	5.4	755	84439	6.81
31	gi|47523720	glucose-6-phosphate isomerase [Sus scrofa]	82	2	1	7.7	558	63257	7.79
36	gi|47523546	myoglobin [Sus scrofa]	65	3	2	9.1	154	17074	6.75
43	gi|311261653	PREDICTED: protein KIAA0284-like [Sus scrofa]	60	3	2	3.4	1542	165726	6.52
52	gi|335280174	PREDICTED: uveal autoantigen with coiled-coil domains and ankyrin repeats protein-like isoform 1 [Sus scrofa]	52	3	2	7.3	1403	162798	6.41
56	gi|311255411	PREDICTED: LOW QUALITY PROTEIN: keratin, type II cytoskeletal 4 [Sus scrofa]	49	5	3	9.5	611	66127	8.12
61	gi|194037334	PREDICTED: keratin, type II cytoskeletal 3-like [Sus scrofa]	48	4	2	9.8	655	68106	7.08
62	gi|350583995	PREDICTED: keratin, type II cytoskeletal 75-like [Sus scrofa]	48	4	2	11.2	466	51982	6.15
63	gi|335287827	PREDICTED: keratin, type II cytoskeletal 73 [Sus scrofa]	48	4	2	9.3	518	57348	6.18
64	gi|345091038	keratin 74 [Sus scrofa]	48	4	2	8.5	531	58219	6.78
65	gi|311255413	PREDICTED: keratin, type II cytoskeletal 79 [Sus scrofa]	48	4	2	7.5	535	58094	6.45
73	gi|350591252	PREDICTED: RNA-binding protein 5 [Sus scrofa]	45	2	2	2.9	815	92679	5.94

## Sheet: invivo_EHEC_100324_psms
Prot ID	Accession	Description	Mascot Score	# PSMs	# Peptides	Pep_query	Pep_rank	Pep_isbold	Pep_isunique	Pep_exp_mz	Pep_exp_mr	Pep_exp_z	Pep_calc_mr	Pep_delta	Pep_miss	Pep_score	Pep_homol	Pep_ident	Pep_expect	Pep_res_before	Pep_seq	Pep_res_after
10	gi|148747492	keratin, type II cytoskeletal 2 epidermal [Sus scrofa]	210	6	2	102184	6	1	1	449.394	896.774	2	897.409	-0.6353	0	17.51		34	2.6	R	GFGGGGFGSR	S
10	gi|148747492	keratin, type II cytoskeletal 2 epidermal [Sus scrofa]	210	6	2	102187	4	1	1	449.422	896.83	2	897.409	-0.5797	0	16.32		34	3.2	R	GFGGGGFGSR	S
10	gi|148747492	keratin, type II cytoskeletal 2 epidermal [Sus scrofa]	210	6	2	133671	7	1	1	553.1	1104.19	2	1104.52	-0.3317	1	16.19	33	35	3.9	R	GGGGGGGGGGGRFR	G
10	gi|148747492	keratin, type II cytoskeletal 2 epidermal [Sus scrofa]	210	6	2	134151	1	1	1	553.309	1104.6	2	1104.52	0.0855	1	15.43	21	35	5.2	R	GGGGGGGGGGGRFR	G
10	gi|148747492	keratin, type II cytoskeletal 2 epidermal [Sus scrofa]	210	6	2	134402	1	1	1	553.364	1104.71	2	1104.52	0.1951	1	13.87	20	35	7.5	R	GGGGGGGGGGGRFR	G
10	gi|148747492	keratin, type II cytoskeletal 2 epidermal [Sus scrofa]	210	6	2	134585	1	1	1	553.444	1104.87	2	1104.52	0.3553	1	21.76	20	35	1.2	R	GGGGGGGGGGGRFR	G
10	gi|148747492	keratin, type II cytoskeletal 2 epidermal [Sus scrofa]	210	6	2	147242	1	1	1	589.727	1177.44	2	1178.59	-1.1539	1	13.53	21	35	7.2	K	KDVDNAYINK	A
10	gi|148747492	keratin, type II cytoskeletal 2 epidermal [Sus scrofa]	210	6	2	147264	1	1	1	589.969	1177.92	2	1178.59	-0.6701	1	16.18	23	34	3.8	K	KDVDNAYINK	A
10	gi|148747492	keratin, type II cytoskeletal 2 epidermal [Sus scrofa]	210	6	2	162875	1	1	1	627.714	1253.41	2	1253.6	-0.1858	0	85.96	32	34	3.6e-07	R	GFSSGSAVVSGGSR	G
10	gi|148747492	keratin, type II cytoskeletal 2 epidermal [Sus scrofa]	210	6	2	162948	1	1	1	627.985	1253.96	2	1253.6	0.3554	0	88.08	32	34	2.1e-07	R	GFSSGSAVVSGGSR	G
10	gi|148747492	keratin, type II cytoskeletal 2 epidermal [Sus scrofa]	210	6	2	205564	1	0	1	738.465	1474.92	2	1474.81	0.1017	1	41.74		34	0.0089	R	FLEQQNQVLKTK	W
10	gi|148747492	keratin, type II cytoskeletal 2 epidermal [Sus scrofa]	210	6	2	205572	1	0	1	738.488	1474.96	2	1474.81	0.1475	1	43.22		34	0.0064	R	FLEQQNQVLKTK	W
10	gi|148747492	keratin, type II cytoskeletal 2 epidermal [Sus scrofa]	210	6	2	205576	1	0	1	738.494	1474.97	2	1474.81	0.1581	1	53.7		34	0.00057	R	FLEQQNQVLKTK	W
10	gi|148747492	keratin, type II cytoskeletal 2 epidermal [Sus scrofa]	210	6	2	205604	2	0	1	738.604	1475.19	2	1474.81	0.3799	1	62.42		32	5.7e-05	R	FLEQQNQVLKTK	W	emPAI	0.16
11	gi|335289549	PREDICTED: glyceraldehyde-3-phosphate dehydrogenase, testis-specific-like [Sus scrofa]	201	19	2	92253	1	0	0	795.252	794.245	1	794.411	-0.1658	0	16.28	26	34	3.7	K	LTGMAFR	V
11	gi|335289549	PREDICTED: glyceraldehyde-3-phosphate dehydrogenase, testis-specific-like [Sus scrofa]	201	19	2	92254	1	0	0	795.255	794.248	1	794.411	-0.1632	0	21.97	26	34	1	K	LTGMAFR	V
11	gi|335289549	PREDICTED: glyceraldehyde-3-phosphate dehydrogenase, testis-specific-like [Sus scrofa]	201	19	2	92256	1	0	0	795.286	794.279	1	794.411	-0.1324	0	18.45	24	34	2.2	K	LTGMAFR	V
11	gi|335289549	PREDICTED: glyceraldehyde-3-phosphate dehydrogenase, testis-specific-like [Sus scrofa]	201	19	2	92259	1	0	0	795.313	794.306	1	794.411	-0.1051	0	21.58	26	34	1.1	K	LTGMAFR	V
11	gi|335289549	PREDICTED: glyceraldehyde-3-phosphate dehydrogenase, testis-specific-like [Sus scrofa]	201	19	2	92264	1	0	0	795.338	794.33	1	794.411	-0.0806	0	28.04	26	34	0.25	K	LTGMAFR	V
11	gi|335289549	PREDICTED: glyceraldehyde-3-phosphate dehydrogenase, testis-specific-like [Sus scrofa]	201	19	2	92266	1	0	0	398.183	794.351	2	794.411	-0.0598	0	29.56	27	34	0.17	K	LTGMAFR	V
11	gi|335289549	PREDICTED: glyceraldehyde-3-phosphate dehydrogenase, testis-specific-like [Sus scrofa]	201	19	2	92267	1	0	0	795.361	794.353	1	794.411	-0.0575	0	22.01	24	34	0.99	K	LTGMAFR	V
11	gi|335289549	PREDICTED: glyceraldehyde-3-phosphate dehydrogenase, testis-specific-like [Sus scrofa]	201	19	2	92268	1	0	0	795.362	794.355	1	794.411	-0.0558	0	21.67	27	34	1.1	K	LTGMAFR	V
11	gi|335289549	PREDICTED: glyceraldehyde-3-phosphate dehydrogenase, testis-specific-like [Sus scrofa]	201	19	2	92269	1	0	0	795.37	794.362	1	794.411	-0.0484	0	18.85	27	34	2	K	LTGMAFR	V
11	gi|335289549	PREDICTED: glyceraldehyde-3-phosphate dehydrogenase, testis-specific-like [Sus scrofa]	201	19	2	92271	1	0	0	795.381	794.374	1	794.411	-0.0373	0	21.5	25	34	1.1	K	LTGMAFR	V
11	gi|335289549	PREDICTED: glyceraldehyde-3-phosphate dehydrogenase, testis-specific-like [Sus scrofa]	201	19	2	92279	1	0	0	398.283	794.552	2	794.411	0.1412	0	33.61	27	34	0.068	K	LTGMAFR	V
11	gi|335289549	PREDICTED: glyceraldehyde-3-phosphate dehydrogenase, testis-specific-like [Sus scrofa]	201	19	2	92286	1	0	0	398.337	794.66	2	794.411	0.249	0	38.07	30	34	0.024	K	LTGMAFR	V
11	gi|335289549	PREDICTED: glyceraldehyde-3-phosphate dehydrogenase, testis-specific-like [Sus scrofa]	201	19	2	92288	1	0	0	398.362	794.709	2	794.411	0.298	0	26.97	30	34	0.31	K	LTGMAFR	V
11	gi|335289549	PREDICTED: glyceraldehyde-3-phosphate dehydrogenase, testis-specific-like [Sus scrofa]	201	19	2	92289	1	0	0	398.378	794.742	2	794.411	0.3312	0	39.07	30	34	0.019	K	LTGMAFR	V
11	gi|335289549	PREDICTED: glyceraldehyde-3-phosphate dehydrogenase, testis-specific-like [Sus scrofa]	201	19	2	92290	1	0	0	398.382	794.748	2	794.411	0.3376	0	36.3	27	34	0.035	K	LTGMAFR	V
11	gi|335289549	PREDICTED: glyceraldehyde-3-phosphate dehydrogenase, testis-specific-like [Sus scrofa]	201	19	2	92292	1	0	0	398.391	794.767	2	794.411	0.3558	0	33.63	26	34	0.062	K	LTGMAFR	V
11	gi|335289549	PREDICTED: glyceraldehyde-3-phosphate dehydrogenase, testis-specific-like [Sus scrofa]	201	19	2	92294	1	0	0	398.408	794.801	2	794.411	0.3906	0	36.4	28	34	0.029	K	LTGMAFR	V
11	gi|335289549	PREDICTED: glyceraldehyde-3-phosphate dehydrogenase, testis-specific-like [Sus scrofa]	201	19	2	92296	1	0	0	398.425	794.835	2	794.411	0.4244	0	37.81	29	33	0.019	K	LTGMAFR	V
11	gi|335289549	PREDICTED: glyceraldehyde-3-phosphate dehydrogenase, testis-specific-like [Sus scrofa]	201	19	2	92299	1	0	0	398.435	794.856	2	794.411	0.4448	0	38.05	32	33	0.017	K	LTGMAFR	V
11	gi|335289549	PREDICTED: glyceraldehyde-3-phosphate dehydrogenase, testis-specific-like [Sus scrofa]	201	19	2	92300	1	0	0	398.45	794.886	2	794.411	0.475	0	40.15	29	33	0.01	K	LTGMAFR	V
11	gi|335289549	PREDICTED: glyceraldehyde-3-phosphate dehydrogenase, testis-specific-like [Sus scrofa]	201	19	2	92302	1	0	0	398.459	794.903	2	794.411	0.4926	0	20.11	25	33	1	K	LTGMAFR	V
11	gi|335289549	PREDICTED: glyceraldehyde-3-phosphate dehydrogenase, testis-specific-like [Sus scrofa]	201	19	2	92308	1	0	0	398.481	794.946	2	794.411	0.5356	0	39.64	29	33	0.012	K	LTGMAFR	V
11	gi|335289549	PREDICTED: glyceraldehyde-3-phosphate dehydrogenase, testis-specific-like [Sus scrofa]	201	19	2	92312	1	0	0	398.491	794.967	2	794.411	0.5564	0	37.67	27	33	0.019	K	LTGMAFR	V
11	gi|335289549	PREDICTED: glyceraldehyde-3-phosphate dehydrogenase, testis-specific-like [Sus scrofa]	201	19	2	92323	2	0	0	398.509	795.004	2	794.411	0.593	0	13.5	27	34	5.6	K	LTGMAFR	V
11	gi|335289549	PREDICTED: glyceraldehyde-3-phosphate dehydrogenase, testis-specific-like [Sus scrofa]	201	19	2	92357	1	0	0	398.578	795.142	2	794.411	0.7308	0	20.24	26	34	1.4	K	LTGMAFR	V
11	gi|335289549	PREDICTED: glyceraldehyde-3-phosphate dehydrogenase, testis-specific-like [Sus scrofa]	201	19	2	92368	1	0	0	398.597	795.179	2	794.411	0.7678	0	15.35	25	34	4.5	K	LTGMAFR	V
11	gi|335289549	PREDICTED: glyceraldehyde-3-phosphate dehydrogenase, testis-specific-like [Sus scrofa]	201	19	2	92371	1	0	0	398.603	795.191	2	794.411	0.7798	0	14.24	25	34	5.7	K	LTGMAFR	V
11	gi|335289549	PREDICTED: glyceraldehyde-3-phosphate dehydrogenase, testis-specific-like [Sus scrofa]	201	19	2	93578	1	0	0	406.015	810.016	2	810.406	-0.3896	0	13.01	23	33	5.9	K	LTGMAFR	V
11	gi|335289549	PREDICTED: glyceraldehyde-3-phosphate dehydrogenase, testis-specific-like [Sus scrofa]	201	19	2	93598	1	0	0	811.297	810.289	1	810.406	-0.1165	0	15.37	27	34	4.2	K	LTGMAFR	V
11	gi|335289549	PREDICTED: glyceraldehyde-3-phosphate dehydrogenase, testis-specific-like [Sus scrofa]	201	19	2	93608	1	0	0	811.4	810.393	1	810.406	-0.0133	0	17.26	27	34	2.7	K	LTGMAFR	V
11	gi|335289549	PREDICTED: glyceraldehyde-3-phosphate dehydrogenase, testis-specific-like [Sus scrofa]	201	19	2	93625	1	0	0	406.33	810.646	2	810.406	0.2406	0	35.79	31	34	0.038	K	LTGMAFR	V
11	gi|335289549	PREDICTED: glyceraldehyde-3-phosphate dehydrogenase, testis-specific-like [Sus scrofa]	201	19	2	93628	1	0	0	406.367	810.719	2	810.406	0.3128	0	42.25		34	0.0085	K	LTGMAFR	V
11	gi|335289549	PREDICTED: glyceraldehyde-3-phosphate dehydrogenase, testis-specific-like [Sus scrofa]	201	19	2	93637	1	0	0	406.386	810.758	2	810.406	0.352	0	39.22		34	0.016	K	LTGMAFR	V
11	gi|335289549	PREDICTED: glyceraldehyde-3-phosphate dehydrogenase, testis-specific-like [Sus scrofa]	201	19	2	93641	1	0	0	406.411	810.808	2	810.406	0.4022	0	37.08		33	0.024	K	LTGMAFR	V
11	gi|335289549	PREDICTED: glyceraldehyde-3-phosphate dehydrogenase, testis-specific-like [Sus scrofa]	201	19	2	93643	2	0	0	406.418	810.821	2	810.406	0.4156	0	13.71	27	33	5	K	LTGMAFR	V
11	gi|335289549	PREDICTED: glyceraldehyde-3-phosphate dehydrogenase, testis-specific-like [Sus scrofa]	201	19	2	93646	1	0	0	406.423	810.831	2	810.406	0.4252	0	33.1	31	33	0.056	K	LTGMAFR	V
11	gi|335289549	PREDICTED: glyceraldehyde-3-phosphate dehydrogenase, testis-specific-like [Sus scrofa]	201	19	2	93648	1	0	0	406.429	810.844	2	810.406	0.4384	0	39.58	32	33	0.012	K	LTGMAFR	V
11	gi|335289549	PREDICTED: glyceraldehyde-3-phosphate dehydrogenase, testis-specific-like [Sus scrofa]	201	19	2	93652	1	0	0	406.447	810.879	2	810.406	0.473	0	39.2		33	0.012	K	LTGMAFR	V
11	gi|335289549	PREDICTED: glyceraldehyde-3-phosphate dehydrogenase, testis-specific-like [Sus scrofa]	201	19	2	93653	1	0	0	406.45	810.885	2	810.406	0.479	0	43.64		33	0.0044	K	LTGMAFR	V
11	gi|335289549	PREDICTED: glyceraldehyde-3-phosphate dehydrogenase, testis-specific-like [Sus scrofa]	201	19	2	93654	1	0	0	406.452	810.889	2	810.406	0.4836	0	21.54	26	33	0.71	K	LTGMAFR	V
11	gi|335289549	PREDICTED: glyceraldehyde-3-phosphate dehydrogenase, testis-specific-like [Sus scrofa]	201	19	2	93655	2	0	0	406.453	810.892	2	810.406	0.4864	0	14.38	28	33	3.7	K	LTGMAFR	V
11	gi|335289549	PREDICTED: glyceraldehyde-3-phosphate dehydrogenase, testis-specific-like [Sus scrofa]	201	19	2	93657	1	0	0	406.458	810.901	2	810.406	0.4952	0	41.4		33	0.0073	K	LTGMAFR	V
11	gi|335289549	PREDICTED: glyceraldehyde-3-phosphate dehydrogenase, testis-specific-like [Sus scrofa]	201	19	2	93665	1	0	0	406.496	810.977	2	810.406	0.571	0	26.37	28	33	0.24	K	LTGMAFR	V
11	gi|335289549	PREDICTED: glyceraldehyde-3-phosphate dehydrogenase, testis-specific-like [Sus scrofa]	201	19	2	93666	1	0	0	406.496	810.978	2	810.406	0.5724	0	32.49	31	33	0.06	K	LTGMAFR	V
11	gi|335289549	PREDICTED: glyceraldehyde-3-phosphate dehydrogenase, testis-specific-like [Sus scrofa]	201	19	2	144725	1	1	1	388.337	1161.99	3	1161.61	0.3746	0	15.82	26	34	3.8	R	ELTVGINGFGR	I
11	gi|335289549	PREDICTED: glyceraldehyde-3-phosphate dehydrogenase, testis-specific-like [Sus scrofa]	201	19	2	144768	1	1	1	388.408	1162.2	3	1161.61	0.5885	0	15.09	23	34	4.6	R	ELTVGINGFGR	I
11	gi|335289549	PREDICTED: glyceraldehyde-3-phosphate dehydrogenase, testis-specific-like [Sus scrofa]	201	19	2	265369	1	0	0	910.714	1819.41	2	1818.9	0.5159	0	43.24		32	0.0041	K	IVSNASCTTNCLAPLAK	V
11	gi|335289549	PREDICTED: glyceraldehyde-3-phosphate dehydrogenase, testis-specific-like [Sus scrofa]	201	19	2	265449	1	0	0	910.943	1819.87	2	1818.9	0.9741	0	21.5		33	0.85	K	IVSNASCTTNCLAPLAK	V	emPAI	0.34
21	gi|194037336	PREDICTED: keratin, type II cytoskeletal 1b [Sus scrofa]	111	5	2	121081	3	1	1	512.223	1022.43	2	1022.47	-0.0425	1	14.71	28	35	5.6	K	GSSKSGGGGSSR	V
21	gi|194037336	PREDICTED: keratin, type II cytoskeletal 1b [Sus scrofa]	111	5	2	121092	1	1	1	512.272	1022.53	2	1022.47	0.0553	1	18.3	24	35	2.4	K	GSSKSGGGGSSR	V
21	gi|194037336	PREDICTED: keratin, type II cytoskeletal 1b [Sus scrofa]	111	5	2	121097	1	1	1	512.299	1022.58	2	1022.47	0.1101	1	24.09	21	35	0.64	K	GSSKSGGGGSSR	V
21	gi|194037336	PREDICTED: keratin, type II cytoskeletal 1b [Sus scrofa]	111	5	2	121104	3	1	1	512.335	1022.65	2	1022.47	0.1807	1	13.41	27	35	7.5	K	GSSKSGGGGSSR	V
21	gi|194037336	PREDICTED: keratin, type II cytoskeletal 1b [Sus scrofa]	111	5	2	121208	1	1	1	512.587	1023.16	2	1022.47	0.6851	1	19.09	29	34	1.8	K	GSSKSGGGGSSR	V
21	gi|194037336	PREDICTED: keratin, type II cytoskeletal 1b [Sus scrofa]	111	5	2	129476	1	0	0	541.203	1080.39	2	1081.59	-1.2006	1	35.74	27	34	0.041	K	FASFIDKVR	F
21	gi|194037336	PREDICTED: keratin, type II cytoskeletal 1b [Sus scrofa]	111	5	2	205564	1	0	0	738.465	1474.92	2	1474.78	0.1381	0	41.74		34	0.0089	R	FLEQQNQVLQTK	W
21	gi|194037336	PREDICTED: keratin, type II cytoskeletal 1b [Sus scrofa]	111	5	2	205572	1	0	0	738.488	1474.96	2	1474.78	0.1839	0	43.22		34	0.0064	R	FLEQQNQVLQTK	W
21	gi|194037336	PREDICTED: keratin, type II cytoskeletal 1b [Sus scrofa]	111	5	2	205576	1	0	0	738.494	1474.97	2	1474.78	0.1945	0	53.7		34	0.00057	R	FLEQQNQVLQTK	W
21	gi|194037336	PREDICTED: keratin, type II cytoskeletal 1b [Sus scrofa]	111	5	2	205604	1	0	0	738.604	1475.19	2	1474.78	0.4163	0	64.35		32	3.7e-05	R	FLEQQNQVLQTK	W	emPAI	0.16
36	gi|47523546	myoglobin [Sus scrofa]	65	3	2	85731	1	1	1	748.438	747.431	1	747.428	0.0027	0	20.29	29	36	2.1	K	ALELFR	N
36	gi|47523546	myoglobin [Sus scrofa]	65	3	2	85732	3	1	1	748.444	747.437	1	747.428	0.0091	0	17.06	31	36	4.5	K	ALELFR	N
36	gi|47523546	myoglobin [Sus scrofa]	65	3	2	85736	1	1	1	374.869	747.723	2	747.428	0.2955	0	34.48		36	0.081	K	ALELFR	N
36	gi|47523546	myoglobin [Sus scrofa]	65	3	2	85739	1	1	1	374.898	747.781	2	747.428	0.3535	0	32.81		35	0.1	K	ALELFR	N
36	gi|47523546	myoglobin [Sus scrofa]	65	3	2	85741	1	1	1	374.908	747.802	2	747.428	0.3737	0	33.06		35	0.089	K	ALELFR	N
36	gi|47523546	myoglobin [Sus scrofa]	65	3	2	85742	1	1	1	374.914	747.814	2	747.428	0.3859	0	29.74		35	0.18	K	ALELFR	N
36	gi|47523546	myoglobin [Sus scrofa]	65	3	2	85749	1	1	1	375.02	748.026	2	747.428	0.5981	0	41.33		35	0.014	K	ALELFR	N
36	gi|47523546	myoglobin [Sus scrofa]	65	3	2	85780	1	1	1	375.095	748.176	2	747.428	0.7479	0	29.36		36	0.23	K	ALELFR	N
36	gi|47523546	myoglobin [Sus scrofa]	65	3	2	107335	1	1	1	470.551	939.087	2	940.465	-1.3782	1	18.76	21	34	1.7	K	YKELGFQG	-
36	gi|47523546	myoglobin [Sus scrofa]	65	3	2	107507	1	1	1	471.075	940.136	2	940.465	-0.329	1	34.9	21	34	0.045	K	YKELGFQG	-
36	gi|47523546	myoglobin [Sus scrofa]	65	3	2	107539	1	1	1	941.281	940.273	1	940.465	-0.1921	1	34.83	21	34	0.052	K	YKELGFQG	-
36	gi|47523546	myoglobin [Sus scrofa]	65	3	2	107755	1	1	1	471.395	940.776	2	940.465	0.3104	1	29.96	24	34	0.16	K	YKELGFQG	-	emPAI	0.72
43	gi|311261653	PREDICTED: protein KIAA0284-like [Sus scrofa]	60	3	2	86677	9	0	1	378.881	755.747	2	756.449	-0.7025	0	25.07		35	0.5	K	DVAILAR	E
43	gi|311261653	PREDICTED: protein KIAA0284-like [Sus scrofa]	60	3	2	86682	3	0	1	378.914	755.814	2	756.449	-0.6357	0	27.65		34	0.24	K	DVAILAR	E
43	gi|311261653	PREDICTED: protein KIAA0284-like [Sus scrofa]	60	3	2	86702	2	0	1	379.038	756.061	2	756.449	-0.3881	0	28.24		35	0.27	K	DVAILAR	E
43	gi|311261653	PREDICTED: protein KIAA0284-like [Sus scrofa]	60	3	2	86804	8	0	1	379.191	756.367	2	756.449	-0.0827	0	22.98		35	0.98	K	DVAILAR	E
43	gi|311261653	PREDICTED: protein KIAA0284-like [Sus scrofa]	60	3	2	86843	2	0	1	379.265	756.516	2	756.449	0.0663	0	44.19		35	0.0074	K	DVAILAR	E
43	gi|311261653	PREDICTED: protein KIAA0284-like [Sus scrofa]	60	3	2	86851	2	0	1	379.368	756.721	2	756.449	0.2719	0	43.55		35	0.0085	K	DVAILAR	E
43	gi|311261653	PREDICTED: protein KIAA0284-like [Sus scrofa]	60	3	2	128456	2	1	1	537.261	1072.51	2	1072.48	0.0291	0	13.1	26	35	9.3	R	DEPSDGVAQR	M
43	gi|311261653	PREDICTED: protein KIAA0284-like [Sus scrofa]	60	3	2	128534	3	1	1	537.413	1072.81	2	1072.48	0.3319	0	22.36		35	1.1	R	DEPSDGVAQR	M
43	gi|311261653	PREDICTED: protein KIAA0284-like [Sus scrofa]	60	3	2	128539	1	1	1	537.424	1072.83	2	1072.48	0.3543	0	19.93	32	35	1.9	R	DEPSDGVAQR	M
43	gi|311261653	PREDICTED: protein KIAA0284-like [Sus scrofa]	60	3	2	128555	4	1	1	537.508	1073	2	1072.48	0.5221	0	16.15	31	34	3.4	R	DEPSDGVAQR	M
43	gi|311261653	PREDICTED: protein KIAA0284-like [Sus scrofa]	60	3	2	128567	3	1	1	537.563	1073.11	2	1072.48	0.6333	0	15.96	29	34	3.4	R	DEPSDGVAQR	M
43	gi|311261653	PREDICTED: protein KIAA0284-like [Sus scrofa]	60	3	2	140634	3	0	1	568.811	1135.61	2	1135.46	0.1511	0	13.18	28	35	8.1	R	DLDQNMNDR	C
43	gi|311261653	PREDICTED: protein KIAA0284-like [Sus scrofa]	60	3	2	148595	4	1	1	1186.4	1185.39	1	1186.69	-1.3024	1	18.57	33	35	2.3	K	EISSILKELR	R
43	gi|311261653	PREDICTED: protein KIAA0284-like [Sus scrofa]	60	3	2	148597	2	1	1	593.736	1185.46	2	1186.69	-1.2344	1	17.61	32	35	2.8	K	EISSILKELR	R
43	gi|311261653	PREDICTED: protein KIAA0284-like [Sus scrofa]	60	3	2	148631	1	1	1	594.034	1186.05	2	1186.69	-0.6384	1	28.51		33	0.18	K	EISSILKELR	R
43	gi|311261653	PREDICTED: protein KIAA0284-like [Sus scrofa]	60	3	2	148643	1	1	1	594.086	1186.16	2	1186.69	-0.535	1	40.53		33	0.011	K	EISSILKELR	R
43	gi|311261653	PREDICTED: protein KIAA0284-like [Sus scrofa]	60	3	2	148646	1	1	1	594.095	1186.17	2	1186.69	-0.5174	1	31.78		33	0.083	K	EISSILKELR	R
43	gi|311261653	PREDICTED: protein KIAA0284-like [Sus scrofa]	60	3	2	148663	4	1	1	594.131	1186.25	2	1186.69	-0.444	1	14.24	31	34	5.7	K	EISSILKELR	R
43	gi|311261653	PREDICTED: protein KIAA0284-like [Sus scrofa]	60	3	2	148682	1	1	1	594.184	1186.35	2	1186.69	-0.3392	1	33.33	34	35	0.077	K	EISSILKELR	R
43	gi|311261653	PREDICTED: protein KIAA0284-like [Sus scrofa]	60	3	2	148934	2	1	1	594.671	1187.33	2	1186.69	0.635	1	29.93	33	35	0.17	K	EISSILKELR	R
43	gi|311261653	PREDICTED: protein KIAA0284-like [Sus scrofa]	60	3	2	233389	1	1	1	545.176	1632.51	3	1632.73	-0.2266	1	14.43	24	33	4.2	R	ARLGDASDTEAADGER	G	emPAI	0.04
52	gi|335280174	PREDICTED: uveal autoantigen with coiled-coil domains and ankyrin repeats protein-like isoform 1 [Sus scrofa]	52	3	2	86645	4	1	1	378.473	754.932	2	755.381	-0.4497	0	14.27	26	33	3.9	K	THEEIK	T
52	gi|335280174	PREDICTED: uveal autoantigen with coiled-coil domains and ankyrin repeats protein-like isoform 1 [Sus scrofa]	52	3	2	89374	7	1	0	388.976	775.937	2	776.41	-0.4735	1	14.48	30	35	5.7	K	KLEMEK	L
52	gi|335280174	PREDICTED: uveal autoantigen with coiled-coil domains and ankyrin repeats protein-like isoform 1 [Sus scrofa]	52	3	2	89375	2	1	0	388.978	775.941	2	776.41	-0.4693	1	13.67	26	35	6.8	K	KLEMEK	L
52	gi|335280174	PREDICTED: uveal autoantigen with coiled-coil domains and ankyrin repeats protein-like isoform 1 [Sus scrofa]	52	3	2	89567	7	1	1	389.858	777.7	2	777.394	0.3062	0	17.21	34	36	4.2	R	LMEELK	D
52	gi|335280174	PREDICTED: uveal autoantigen with coiled-coil domains and ankyrin repeats protein-like isoform 1 [Sus scrofa]	52	3	2	94155	1	1	1	408.808	815.601	2	814.455	1.146	0	18.12	28	36	3.5	K	QLAELNK	K
52	gi|335280174	PREDICTED: uveal autoantigen with coiled-coil domains and ankyrin repeats protein-like isoform 1 [Sus scrofa]	52	3	2	96247	5	1	1	417.195	832.376	2	833.443	-1.0672	1	15.1	32	36	6.7	R	LMKAAER	G
52	gi|335280174	PREDICTED: uveal autoantigen with coiled-coil domains and ankyrin repeats protein-like isoform 1 [Sus scrofa]	52	3	2	96256	3	1	1	417.217	832.419	2	833.443	-1.0238	1	17.61	31	36	3.7	R	LMKAAER	G
52	gi|335280174	PREDICTED: uveal autoantigen with coiled-coil domains and ankyrin repeats protein-like isoform 1 [Sus scrofa]	52	3	2	96260	5	1	1	417.224	832.433	2	833.443	-1.0094	1	25.64		36	0.59	R	LMKAAER	G
52	gi|335280174	PREDICTED: uveal autoantigen with coiled-coil domains and ankyrin repeats protein-like isoform 1 [Sus scrofa]	52	3	2	96265	3	1	1	417.243	832.472	2	833.443	-0.971	1	16.3	31	36	5.1	R	LMKAAER	G
52	gi|335280174	PREDICTED: uveal autoantigen with coiled-coil domains and ankyrin repeats protein-like isoform 1 [Sus scrofa]	52	3	2	96266	9	1	1	417.243	832.472	2	833.443	-0.9704	1	16.24	31	36	5.1	R	LMKAAER	G
52	gi|335280174	PREDICTED: uveal autoantigen with coiled-coil domains and ankyrin repeats protein-like isoform 1 [Sus scrofa]	52	3	2	96287	4	1	1	417.306	832.598	2	833.443	-0.8446	1	14.97	32	36	6.9	R	LMKAAER	G
52	gi|335280174	PREDICTED: uveal autoantigen with coiled-coil domains and ankyrin repeats protein-like isoform 1 [Sus scrofa]	52	3	2	96293	4	1	1	417.322	832.629	2	833.443	-0.8142	1	17.93	34	36	3.5	R	LMKAAER	G
52	gi|335280174	PREDICTED: uveal autoantigen with coiled-coil domains and ankyrin repeats protein-like isoform 1 [Sus scrofa]	52	3	2	96306	5	1	1	417.383	832.752	2	833.443	-0.6906	1	14.95	29	36	6.8	R	LMKAAER	G
52	gi|335280174	PREDICTED: uveal autoantigen with coiled-coil domains and ankyrin repeats protein-like isoform 1 [Sus scrofa]	52	3	2	96377	3	1	1	417.881	833.747	2	833.443	0.3046	1	22.66		36	1.1	R	LMKAAER	G
52	gi|335280174	PREDICTED: uveal autoantigen with coiled-coil domains and ankyrin repeats protein-like isoform 1 [Sus scrofa]	52	3	2	158966	1	1	1	618.828	1235.64	2	1234.59	1.0561	1	27.2	26	34	0.29	K	CNVTEEEVKK	C
52	gi|335280174	PREDICTED: uveal autoantigen with coiled-coil domains and ankyrin repeats protein-like isoform 1 [Sus scrofa]	52	3	2	158970	2	1	1	618.835	1235.66	2	1234.59	1.0691	1	16.08	25	34	3.7	K	CNVTEEEVKK	C
52	gi|335280174	PREDICTED: uveal autoantigen with coiled-coil domains and ankyrin repeats protein-like isoform 1 [Sus scrofa]	52	3	2	158978	1	1	1	618.867	1235.72	2	1234.59	1.1329	1	37.94		34	0.024	K	CNVTEEEVKK	C
52	gi|335280174	PREDICTED: uveal autoantigen with coiled-coil domains and ankyrin repeats protein-like isoform 1 [Sus scrofa]	52	3	2	158990	1	1	1	618.905	1235.8	2	1234.59	1.2095	1	21.24	25	34	1.1	K	CNVTEEEVKK	C
52	gi|335280174	PREDICTED: uveal autoantigen with coiled-coil domains and ankyrin repeats protein-like isoform 1 [Sus scrofa]	52	3	2	158999	1	1	1	618.933	1235.85	2	1234.59	1.2641	1	33.71	30	34	0.064	K	CNVTEEEVKK	C
52	gi|335280174	PREDICTED: uveal autoantigen with coiled-coil domains and ankyrin repeats protein-like isoform 1 [Sus scrofa]	52	3	2	159172	1	1	1	413.326	1236.95	3	1236.63	0.32	1	15.12	24	34	4.3	K	VKYEGASAEVGK	L
52	gi|335280174	PREDICTED: uveal autoantigen with coiled-coil domains and ankyrin repeats protein-like isoform 1 [Sus scrofa]	52	3	2	170049	5	1	1	430.456	1288.35	3	1289.66	-1.319	1	15.17		34	4.6	R	LMEELKDQLR	D
52	gi|335280174	PREDICTED: uveal autoantigen with coiled-coil domains and ankyrin repeats protein-like isoform 1 [Sus scrofa]	52	3	2	170050	9	1	1	430.459	1288.36	3	1289.66	-1.3097	1	15.56		34	4.2	R	LMEELKDQLR	D
52	gi|335280174	PREDICTED: uveal autoantigen with coiled-coil domains and ankyrin repeats protein-like isoform 1 [Sus scrofa]	52	3	2	228811	2	1	1	803.381	1604.75	2	1603.87	0.8806	1	21.32	28	33	0.88	K	SLNSTIETLKEELK	T
52	gi|335280174	PREDICTED: uveal autoantigen with coiled-coil domains and ankyrin repeats protein-like isoform 1 [Sus scrofa]	52	3	2	228836	1	1	1	803.482	1604.95	2	1603.87	1.0828	1	19.91	29	33	1.2	K	SLNSTIETLKEELK	T
52	gi|335280174	PREDICTED: uveal autoantigen with coiled-coil domains and ankyrin repeats protein-like isoform 1 [Sus scrofa]	52	3	2	228837	1	1	1	803.482	1604.95	2	1603.87	1.0836	1	21.6	27	33	0.83	K	SLNSTIETLKEELK	T
52	gi|335280174	PREDICTED: uveal autoantigen with coiled-coil domains and ankyrin repeats protein-like isoform 1 [Sus scrofa]	52	3	2	228838	2	1	1	803.483	1604.95	2	1603.87	1.0846	1	16.05	26	33	3	K	SLNSTIETLKEELK	T
52	gi|335280174	PREDICTED: uveal autoantigen with coiled-coil domains and ankyrin repeats protein-like isoform 1 [Sus scrofa]	52	3	2	228845	1	1	1	803.504	1604.99	2	1603.87	1.1266	1	19.27	31	33	1.4	K	SLNSTIETLKEELK	T
52	gi|335280174	PREDICTED: uveal autoantigen with coiled-coil domains and ankyrin repeats protein-like isoform 1 [Sus scrofa]	52	3	2	228865	1	1	1	803.549	1605.08	2	1603.87	1.217	1	24.6	28	33	0.41	K	SLNSTIETLKEELK	T
52	gi|335280174	PREDICTED: uveal autoantigen with coiled-coil domains and ankyrin repeats protein-like isoform 1 [Sus scrofa]	52	3	2	228868	1	1	1	803.559	1605.1	2	1603.87	1.2374	1	14.63	21	33	4	K	SLNSTIETLKEELK	T
52	gi|335280174	PREDICTED: uveal autoantigen with coiled-coil domains and ankyrin repeats protein-like isoform 1 [Sus scrofa]	52	3	2	228887	1	1	1	803.617	1605.22	2	1603.87	1.3528	1	36.49	32	32	0.022	K	SLNSTIETLKEELK	T
52	gi|335280174	PREDICTED: uveal autoantigen with coiled-coil domains and ankyrin repeats protein-like isoform 1 [Sus scrofa]	52	3	2	228895	1	1	1	803.631	1605.25	2	1603.87	1.3808	1	37.85	29	32	0.015	K	SLNSTIETLKEELK	T
52	gi|335280174	PREDICTED: uveal autoantigen with coiled-coil domains and ankyrin repeats protein-like isoform 1 [Sus scrofa]	52	3	2	253120	4	1	1	582.251	1743.73	3	1742.84	0.893	1	14.37	29	33	4.2	K	FESMKSLLSSEVNEK	A
52	gi|335280174	PREDICTED: uveal autoantigen with coiled-coil domains and ankyrin repeats protein-like isoform 1 [Sus scrofa]	52	3	2	280867	1	1	1	645.02	1932.04	3	1932.91	-0.8721	1	15.55	25	33	2.9	K	NVLVENSHEMERAFSR	K	emPAI	0.04
61	gi|194037334	PREDICTED: keratin, type II cytoskeletal 3-like [Sus scrofa]	48	4	2	76422	2	1	1	686.359	685.352	1	686.371	-1.0191	0	16.76	30	36	4.4	K	NELGVR	G
61	gi|194037334	PREDICTED: keratin, type II cytoskeletal 3-like [Sus scrofa]	48	4	2	76426	1	0	1	686.403	685.395	1	686.371	-0.9759	0	19.64	31	36	2.3	K	NELGVR	G
61	gi|194037334	PREDICTED: keratin, type II cytoskeletal 3-like [Sus scrofa]	48	4	2	110105	6	1	1	957.389	956.381	1	956.565	-0.1842	1	17.74	31	35	3.1	K	EDLARLLK	E
61	gi|194037334	PREDICTED: keratin, type II cytoskeletal 3-like [Sus scrofa]	48	4	2	129476	1	0	0	541.203	1080.39	2	1081.59	-1.2006	1	35.74	27	34	0.041	K	FASFIDKVR	F
61	gi|194037334	PREDICTED: keratin, type II cytoskeletal 3-like [Sus scrofa]	48	4	2	140662	1	1	1	568.939	1135.86	2	1135.62	0.244	1	13.27	25	35	7.9	R	ISSTKSSLASR	S
61	gi|194037334	PREDICTED: keratin, type II cytoskeletal 3-like [Sus scrofa]	48	4	2	205564	3	0	0	738.465	1474.92	2	1475.8	-0.8823	1	28.5		34	0.19	R	FLEQQNKVLETK	W
61	gi|194037334	PREDICTED: keratin, type II cytoskeletal 3-like [Sus scrofa]	48	4	2	205572	3	0	0	738.488	1474.96	2	1475.8	-0.8365	1	32.69		34	0.072	R	FLEQQNKVLETK	W
61	gi|194037334	PREDICTED: keratin, type II cytoskeletal 3-like [Sus scrofa]	48	4	2	205576	3	0	0	738.494	1474.97	2	1475.8	-0.8259	1	34.03		34	0.053	R	FLEQQNKVLETK	W
61	gi|194037334	PREDICTED: keratin, type II cytoskeletal 3-like [Sus scrofa]	48	4	2	205604	3	0	0	738.604	1475.19	2	1475.8	-0.6041	1	36.99		32	0.02	R	FLEQQNKVLETK	W
61	gi|194037334	PREDICTED: keratin, type II cytoskeletal 3-like [Sus scrofa]	48	4	2	205786	1	0	0	739.285	1476.56	2	1475.8	0.7569	1	36.33		34	0.032	R	FLEQQNKVLETK	W
61	gi|194037334	PREDICTED: keratin, type II cytoskeletal 3-like [Sus scrofa]	48	4	2	217851	1	1	1	515.026	1542.06	3	1542.67	-0.6173	1	13.66	21	33	5.4	R	GSGFGGGGRGMGGGFGGR	A
61	gi|194037334	PREDICTED: keratin, type II cytoskeletal 3-like [Sus scrofa]	48	4	2	218523	1	1	1	515.424	1543.25	3	1542.67	0.5764	1	19.03	27	32	1.2	R	GSGFGGGGRGMGGGFGGR	A	emPAI	0.1
62	gi|350583995	PREDICTED: keratin, type II cytoskeletal 75-like [Sus scrofa]	48	4	2	37465	1	1	0	463.283	462.276	1	462.219	0.0569	0	14.26	18	36	8.9	K	SGGSR	N
62	gi|350583995	PREDICTED: keratin, type II cytoskeletal 75-like [Sus scrofa]	48	4	2	129125	2	1	0	539.469	1076.92	2	1077.58	-0.6548	1	13.23	27	35	7.6	R	SSVTIKSGGSR	N
62	gi|350583995	PREDICTED: keratin, type II cytoskeletal 75-like [Sus scrofa]	48	4	2	129476	1	0	0	541.203	1080.39	2	1081.59	-1.2006	1	35.74	27	34	0.041	K	FASFIDKVR	F
62	gi|350583995	PREDICTED: keratin, type II cytoskeletal 75-like [Sus scrofa]	48	4	2	130799	1	1	0	363.332	1086.98	3	1086.6	0.3724	1	23.09	31	34	0.75	R	LRSEIDNLK	K
62	gi|350583995	PREDICTED: keratin, type II cytoskeletal 75-like [Sus scrofa]	48	4	2	175600	2	1	0	662	1321.99	2	1322.65	-0.6641	1	15.87	27	34	3.5	R	STKMEISELNR	V
62	gi|350583995	PREDICTED: keratin, type II cytoskeletal 75-like [Sus scrofa]	48	4	2	175620	4	1	0	662.086	1322.16	2	1322.65	-0.4919	1	15.69	32	32	2.6	R	STKMEISELNR	V
62	gi|350583995	PREDICTED: keratin, type II cytoskeletal 75-like [Sus scrofa]	48	4	2	175704	4	1	0	662.492	1322.97	2	1322.65	0.3197	1	14.17	28	34	5.2	R	STKMEISELNR	V
62	gi|350583995	PREDICTED: keratin, type II cytoskeletal 75-like [Sus scrofa]	48	4	2	205564	3	0	0	738.465	1474.92	2	1475.8	-0.8823	1	28.5		34	0.19	R	FLEQQNKVLETK	W
62	gi|350583995	PREDICTED: keratin, type II cytoskeletal 75-like [Sus scrofa]	48	4	2	205572	3	0	0	738.488	1474.96	2	1475.8	-0.8365	1	32.69		34	0.072	R	FLEQQNKVLETK	W
62	gi|350583995	PREDICTED: keratin, type II cytoskeletal 75-like [Sus scrofa]	48	4	2	205576	3	0	0	738.494	1474.97	2	1475.8	-0.8259	1	34.03		34	0.053	R	FLEQQNKVLETK	W
62	gi|350583995	PREDICTED: keratin, type II cytoskeletal 75-like [Sus scrofa]	48	4	2	205604	3	0	0	738.604	1475.19	2	1475.8	-0.6041	1	36.99		32	0.02	R	FLEQQNKVLETK	W
62	gi|350583995	PREDICTED: keratin, type II cytoskeletal 75-like [Sus scrofa]	48	4	2	205786	1	0	0	739.285	1476.56	2	1475.8	0.7569	1	36.33		34	0.032	R	FLEQQNKVLETK	W	emPAI	0.13
63	gi|335287827	PREDICTED: keratin, type II cytoskeletal 73 [Sus scrofa]	48	4	2	67243	1	0	0	617.292	616.284	1	616.318	-0.0337	0	17.82	25	38	5.9	K	EELAR	M
63	gi|335287827	PREDICTED: keratin, type II cytoskeletal 73 [Sus scrofa]	48	4	2	129476	1	0	0	541.203	1080.39	2	1081.59	-1.2006	1	35.74	27	34	0.041	K	FASFIDKVR	F
63	gi|335287827	PREDICTED: keratin, type II cytoskeletal 73 [Sus scrofa]	48	4	2	142303	1	1	1	576.088	1150.16	2	1149.59	0.572	1	16.65	24	34	2.7	R	AGGKGLSGGFGSR	S
63	gi|335287827	PREDICTED: keratin, type II cytoskeletal 73 [Sus scrofa]	48	4	2	142485	1	1	1	384.668	1150.98	3	1149.59	1.3937	1	13.8	20	34	5.5	R	AGGKGLSGGFGSR	S
63	gi|335287827	PREDICTED: keratin, type II cytoskeletal 73 [Sus scrofa]	48	4	2	205564	3	0	0	738.465	1474.92	2	1475.76	-0.8459	0	28.5		34	0.19	R	FLEQQNQVLETK	W
63	gi|335287827	PREDICTED: keratin, type II cytoskeletal 73 [Sus scrofa]	48	4	2	205572	3	0	0	738.488	1474.96	2	1475.76	-0.8001	0	32.69		34	0.072	R	FLEQQNQVLETK	W
63	gi|335287827	PREDICTED: keratin, type II cytoskeletal 73 [Sus scrofa]	48	4	2	205576	3	0	0	738.494	1474.97	2	1475.76	-0.7895	0	34.03		34	0.053	R	FLEQQNQVLETK	W
63	gi|335287827	PREDICTED: keratin, type II cytoskeletal 73 [Sus scrofa]	48	4	2	205604	3	0	0	738.604	1475.19	2	1475.76	-0.5677	0	36.99		32	0.02	R	FLEQQNQVLETK	W
63	gi|335287827	PREDICTED: keratin, type II cytoskeletal 73 [Sus scrofa]	48	4	2	205786	1	0	0	739.285	1476.56	2	1475.76	0.7933	0	36.33		34	0.032	R	FLEQQNQVLETK	W
63	gi|335287827	PREDICTED: keratin, type II cytoskeletal 73 [Sus scrofa]	48	4	2	263932	1	1	1	604.265	1809.77	3	1809.95	-0.1757	1	15.92	19	33	2.8	K	GLSGGFGSRSLYNLGGIR	S
63	gi|335287827	PREDICTED: keratin, type II cytoskeletal 73 [Sus scrofa]	48	4	2	264062	1	1	1	604.477	1810.41	3	1809.95	0.4615	1	13.26	26	31	3.7	K	GLSGGFGSRSLYNLGGIR	S
63	gi|335287827	PREDICTED: keratin, type II cytoskeletal 73 [Sus scrofa]	48	4	2	264077	1	1	1	604.506	1810.5	3	1809.95	0.5491	1	17.33	20	32	1.7	K	GLSGGFGSRSLYNLGGIR	S	emPAI	0.12
64	gi|345091038	keratin 74 [Sus scrofa]	48	4	2	67243	1	0	0	617.292	616.284	1	616.318	-0.0337	0	17.82	25	38	5.9	K	EELAR	M
64	gi|345091038	keratin 74 [Sus scrofa]	48	4	2	109815	2	1	1	477.393	952.772	2	952.45	0.3221	0	14.04	28	34	6	K	DADAAYTVK	V
64	gi|345091038	keratin 74 [Sus scrofa]	48	4	2	125984	1	1	1	1059.29	1058.29	1	1058.57	-0.2853	1	17.84	28	35	3.1	R	QLNIKSGGDK	G
64	gi|345091038	keratin 74 [Sus scrofa]	48	4	2	129476	1	0	0	541.203	1080.39	2	1081.59	-1.2006	1	35.74	27	34	0.041	K	FASFIDKVR	F
64	gi|345091038	keratin 74 [Sus scrofa]	48	4	2	205564	3	0	0	738.465	1474.92	2	1475.76	-0.8459	0	28.5		34	0.19	R	FLEQQNQVLETK	W
64	gi|345091038	keratin 74 [Sus scrofa]	48	4	2	205572	3	0	0	738.488	1474.96	2	1475.76	-0.8001	0	32.69		34	0.072	R	FLEQQNQVLETK	W
64	gi|345091038	keratin 74 [Sus scrofa]	48	4	2	205576	3	0	0	738.494	1474.97	2	1475.76	-0.7895	0	34.03		34	0.053	R	FLEQQNQVLETK	W
64	gi|345091038	keratin 74 [Sus scrofa]	48	4	2	205604	3	0	0	738.604	1475.19	2	1475.76	-0.5677	0	36.99		32	0.02	R	FLEQQNQVLETK	W
64	gi|345091038	keratin 74 [Sus scrofa]	48	4	2	205786	1	0	0	739.285	1476.56	2	1475.76	0.7933	0	36.33		34	0.032	R	FLEQQNQVLETK	W	emPAI	0.12
65	gi|311255413	PREDICTED: keratin, type II cytoskeletal 79 [Sus scrofa]	48	4	2	129476	1	0	0	541.203	1080.39	2	1081.59	-1.2006	1	35.74	27	34	0.041	K	FASFIDKVR	F
65	gi|311255413	PREDICTED: keratin, type II cytoskeletal 79 [Sus scrofa]	48	4	2	131268	4	1	0	364.43	1090.27	3	1089.57	0.7019	1	13.72	25	35	8	R	KLLESEESR	M
65	gi|311255413	PREDICTED: keratin, type II cytoskeletal 79 [Sus scrofa]	48	4	2	138672	1	1	1	563.232	1124.45	2	1124.53	-0.0796	1	17.17	29	34	2.9	K	KDVDAAFMGR	M
65	gi|311255413	PREDICTED: keratin, type II cytoskeletal 79 [Sus scrofa]	48	4	2	138793	1	1	1	563.298	1124.58	2	1124.53	0.054	1	15.5	25	34	4.3	K	KDVDAAFMGR	M
65	gi|311255413	PREDICTED: keratin, type II cytoskeletal 79 [Sus scrofa]	48	4	2	138901	1	1	1	563.346	1124.68	2	1124.53	0.1496	1	17.48	28	34	2.7	K	KDVDAAFMGR	M
65	gi|311255413	PREDICTED: keratin, type II cytoskeletal 79 [Sus scrofa]	48	4	2	205564	3	0	0	738.465	1474.92	2	1475.8	-0.8823	1	28.5		34	0.19	R	FLEQQNKVLETK	W
65	gi|311255413	PREDICTED: keratin, type II cytoskeletal 79 [Sus scrofa]	48	4	2	205572	3	0	0	738.488	1474.96	2	1475.8	-0.8365	1	32.69		34	0.072	R	FLEQQNKVLETK	W
65	gi|311255413	PREDICTED: keratin, type II cytoskeletal 79 [Sus scrofa]	48	4	2	205576	3	0	0	738.494	1474.97	2	1475.8	-0.8259	1	34.03		34	0.053	R	FLEQQNKVLETK	W
65	gi|311255413	PREDICTED: keratin, type II cytoskeletal 79 [Sus scrofa]	48	4	2	205604	3	0	0	738.604	1475.19	2	1475.8	-0.6041	1	36.99		32	0.02	R	FLEQQNKVLETK	W
65	gi|311255413	PREDICTED: keratin, type II cytoskeletal 79 [Sus scrofa]	48	4	2	205786	1	0	0	739.285	1476.56	2	1475.8	0.7569	1	36.33		34	0.032	R	FLEQQNKVLETK	W	emPAI	0.12
73	gi|350591252	PREDICTED: RNA-binding protein 5 [Sus scrofa]	45	2	2	75497	1	1	0	338.113	674.212	2	674.335	-0.1225	0	31.16	33	37	0.21	R	EGSGLGR	K
73	gi|350591252	PREDICTED: RNA-binding protein 5 [Sus scrofa]	45	2	2	75512	1	1	0	338.353	674.692	2	674.335	0.3577	0	29.49	37	37	0.31	R	EGSGLGR	K
73	gi|350591252	PREDICTED: RNA-binding protein 5 [Sus scrofa]	45	2	2	75513	1	1	0	338.363	674.711	2	674.335	0.3765	0	41.15		37	0.021	R	EGSGLGR	K
73	gi|350591252	PREDICTED: RNA-binding protein 5 [Sus scrofa]	45	2	2	75514	1	1	0	338.37	674.725	2	674.335	0.3899	0	26.31	27	37	0.62	R	EGSGLGR	K
73	gi|350591252	PREDICTED: RNA-binding protein 5 [Sus scrofa]	45	2	2	75515	1	1	0	338.434	674.853	2	674.335	0.5179	0	32.91		35	0.09	R	EGSGLGR	K
73	gi|350591252	PREDICTED: RNA-binding protein 5 [Sus scrofa]	45	2	2	95319	3	1	1	412.486	822.957	2	822.424	0.5331	0	14.37	29	33	4	R	YGSIIDR	D
73	gi|350591252	PREDICTED: RNA-binding protein 5 [Sus scrofa]	45	2	2	95322	4	1	1	412.493	822.971	2	822.424	0.5471	0	17.22	33	33	2.1	R	YGSIIDR	D
73	gi|350591252	PREDICTED: RNA-binding protein 5 [Sus scrofa]	45	2	2	146281	1	1	1	586.251	1170.49	2	1170.56	-0.0754	1	28.91		35	0.21	R	NGDEENPLKR	G
73	gi|350591252	PREDICTED: RNA-binding protein 5 [Sus scrofa]	45	2	2	146375	1	1	1	586.484	1170.95	2	1170.56	0.3908	1	39.53		34	0.017	R	NGDEENPLKR	G	emPAI	0.07
1	gi|242253868	trypsinogen precursor [Sus scrofa]	2017	51	3	97009	1	1	1	843.419	842.412	1	841.502	0.9095	0	32.51	28	36	0.11	R	VATVSLPR	S
1	gi|242253868	trypsinogen precursor [Sus scrofa]	2017	51	3	97010	1	1	1	843.461	842.453	1	841.502	0.9513	0	32.44	25	36	0.11	R	VATVSLPR	S
1	gi|242253868	trypsinogen precursor [Sus scrofa]	2017	51	3	124560	1	1	1	523.186	1044.36	2	1044.56	-0.1993	0	62.42		35	0.0001	K	LSSPATLNSR	V
1	gi|242253868	trypsinogen precursor [Sus scrofa]	2017	51	3	124598	1	1	1	523.238	1044.46	2	1044.56	-0.0955	0	46.25		35	0.0043	K	LSSPATLNSR	V
1	gi|242253868	trypsinogen precursor [Sus scrofa]	2017	51	3	124638	1	1	1	523.298	1044.58	2	1044.56	0.0241	0	53.41		35	0.00083	K	LSSPATLNSR	V
1	gi|242253868	trypsinogen precursor [Sus scrofa]	2017	51	3	124725	1	1	1	523.481	1044.95	2	1044.56	0.3921	0	44.46		34	0.0055	K	LSSPATLNSR	V
1	gi|242253868	trypsinogen precursor [Sus scrofa]	2017	51	3	124737	1	1	1	523.513	1045.01	2	1044.56	0.4547	0	46.69		34	0.0027	K	LSSPATLNSR	V
1	gi|242253868	trypsinogen precursor [Sus scrofa]	2017	51	3	309749	1	1	1	1105.51	2209	2	2210.1	-1.0933	0	43.17	22	32	0.004	R	LGEHNIDVLEGNEQFINAAK	I
1	gi|242253868	trypsinogen precursor [Sus scrofa]	2017	51	3	309763	1	1	1	737.386	2209.14	3	2210.1	-0.9609	0	80.82	25	32	6.9e-07	R	LGEHNIDVLEGNEQFINAAK	I
1	gi|242253868	trypsinogen precursor [Sus scrofa]	2017	51	3	309768	1	1	1	737.404	2209.19	3	2210.1	-0.9081	0	73.59	24	32	3.6e-06	R	LGEHNIDVLEGNEQFINAAK	I
1	gi|242253868	trypsinogen precursor [Sus scrofa]	2017	51	3	309816	1	1	1	737.49	2209.45	3	2210.1	-0.6495	0	20.5	15	31	0.67	R	LGEHNIDVLEGNEQFINAAK	I
1	gi|242253868	trypsinogen precursor [Sus scrofa]	2017	51	3	309849	1	1	1	737.569	2209.69	3	2210.1	-0.4116	0	54.89	18	31	0.00024	R	LGEHNIDVLEGNEQFINAAK	I
1	gi|242253868	trypsinogen precursor [Sus scrofa]	2017	51	3	309868	1	1	1	737.618	2209.83	3	2210.1	-0.264	0	72.67	32	32	4.7e-06	R	LGEHNIDVLEGNEQFINAAK	I
1	gi|242253868	trypsinogen precursor [Sus scrofa]	2017	51	3	309872	1	1	1	737.634	2209.88	3	2210.1	-0.2166	0	67.47	25	32	1.6e-05	R	LGEHNIDVLEGNEQFINAAK	I
1	gi|242253868	trypsinogen precursor [Sus scrofa]	2017	51	3	309877	1	1	1	737.657	2209.95	3	2210.1	-0.147	0	18.18	19	32	1.3	R	LGEHNIDVLEGNEQFINAAK	I
1	gi|242253868	trypsinogen precursor [Sus scrofa]	2017	51	3	309884	1	1	1	1106.05	2210.08	2	2210.1	-0.0213	0	112.97	28	32	4.4e-10	R	LGEHNIDVLEGNEQFINAAK	I
1	gi|242253868	trypsinogen precursor [Sus scrofa]	2017	51	3	309889	1	1	1	1106.09	2210.16	2	2210.1	0.0647	0	96.68	21	32	1.9e-08	R	LGEHNIDVLEGNEQFINAAK	I
1	gi|242253868	trypsinogen precursor [Sus scrofa]	2017	51	3	309891	1	1	1	1106.09	2210.17	2	2210.1	0.0687	0	92.86	24	32	4.6e-08	R	LGEHNIDVLEGNEQFINAAK	I
1	gi|242253868	trypsinogen precursor [Sus scrofa]	2017	51	3	309893	1	1	1	1106.09	2210.17	2	2210.1	0.0767	0	103.92	24	32	3.6e-09	R	LGEHNIDVLEGNEQFINAAK	I
1	gi|242253868	trypsinogen precursor [Sus scrofa]	2017	51	3	309895	1	1	1	1106.1	2210.19	2	2210.1	0.0967	0	113.68	26	32	3.8e-10	R	LGEHNIDVLEGNEQFINAAK	I
1	gi|242253868	trypsinogen precursor [Sus scrofa]	2017	51	3	309897	1	1	1	737.749	2210.22	3	2210.1	0.1269	0	55.19	21	32	0.00027	R	LGEHNIDVLEGNEQFINAAK	I
1	gi|242253868	trypsinogen precursor [Sus scrofa]	2017	51	3	309899	1	1	1	737.768	2210.28	3	2210.1	0.186	0	40.32	27	32	0.0081	R	LGEHNIDVLEGNEQFINAAK	I
1	gi|242253868	trypsinogen precursor [Sus scrofa]	2017	51	3	309901	1	1	1	1106.15	2210.29	2	2210.1	0.1887	0	118.79	26	32	1.2e-10	R	LGEHNIDVLEGNEQFINAAK	I
1	gi|242253868	trypsinogen precursor [Sus scrofa]	2017	51	3	309909	1	1	1	737.823	2210.45	3	2210.1	0.3501	0	58.54	21	31	0.00011	R	LGEHNIDVLEGNEQFINAAK	I
1	gi|242253868	trypsinogen precursor [Sus scrofa]	2017	51	3	309923	1	1	1	737.884	2210.63	3	2210.1	0.5325	0	77.65	26	31	1.2e-06	R	LGEHNIDVLEGNEQFINAAK	I
1	gi|242253868	trypsinogen precursor [Sus scrofa]	2017	51	3	309926	1	1	1	737.894	2210.66	3	2210.1	0.5634	0	73.07	29	31	3.5e-06	R	LGEHNIDVLEGNEQFINAAK	I
1	gi|242253868	trypsinogen precursor [Sus scrofa]	2017	51	3	309927	1	1	1	737.899	2210.68	3	2210.1	0.5796	0	57.28	21	31	0.00013	R	LGEHNIDVLEGNEQFINAAK	I
1	gi|242253868	trypsinogen precursor [Sus scrofa]	2017	51	3	309928	1	1	1	737.9	2210.68	3	2210.1	0.5802	0	56.47	19	31	0.00016	R	LGEHNIDVLEGNEQFINAAK	I
1	gi|242253868	trypsinogen precursor [Sus scrofa]	2017	51	3	309930	1	1	1	737.906	2210.7	3	2210.1	0.5982	0	48	19	31	0.0012	R	LGEHNIDVLEGNEQFINAAK	I
1	gi|242253868	trypsinogen precursor [Sus scrofa]	2017	51	3	309931	1	1	1	737.908	2210.7	3	2210.1	0.6051	0	61.37	26	31	5.5e-05	R	LGEHNIDVLEGNEQFINAAK	I
1	gi|242253868	trypsinogen precursor [Sus scrofa]	2017	51	3	309933	1	1	1	737.914	2210.72	3	2210.1	0.6234	0	70.6	27	31	6.8e-06	R	LGEHNIDVLEGNEQFINAAK	I
1	gi|242253868	trypsinogen precursor [Sus scrofa]	2017	51	3	309937	1	1	1	737.929	2210.77	3	2210.1	0.6687	0	49.32	20	32	0.00096	R	LGEHNIDVLEGNEQFINAAK	I
1	gi|242253868	trypsinogen precursor [Sus scrofa]	2017	51	3	309938	1	1	1	737.931	2210.77	3	2210.1	0.6729	0	62.99	24	32	4.1e-05	R	LGEHNIDVLEGNEQFINAAK	I
1	gi|242253868	trypsinogen precursor [Sus scrofa]	2017	51	3	309943	1	1	1	737.96	2210.86	3	2210.1	0.7608	0	76.26	25	32	2e-06	R	LGEHNIDVLEGNEQFINAAK	I
1	gi|242253868	trypsinogen precursor [Sus scrofa]	2017	51	3	309945	1	1	1	737.966	2210.88	3	2210.1	0.78	0	19.83	19	32	0.91	R	LGEHNIDVLEGNEQFINAAK	I
1	gi|242253868	trypsinogen precursor [Sus scrofa]	2017	51	3	309952	1	1	1	737.981	2210.92	3	2210.1	0.8247	0	33.38		32	0.04	R	LGEHNIDVLEGNEQFINAAK	I
1	gi|242253868	trypsinogen precursor [Sus scrofa]	2017	51	3	309954	1	1	1	737.985	2210.93	3	2210.1	0.8364	0	58.09	22	32	0.00014	R	LGEHNIDVLEGNEQFINAAK	I
1	gi|242253868	trypsinogen precursor [Sus scrofa]	2017	51	3	309956	1	1	1	737.991	2210.95	3	2210.1	0.8547	0	55.27	21	32	0.00026	R	LGEHNIDVLEGNEQFINAAK	I
1	gi|242253868	trypsinogen precursor [Sus scrofa]	2017	51	3	309957	1	1	1	737.996	2210.97	3	2210.1	0.8703	0	41.78	19	32	0.0058	R	LGEHNIDVLEGNEQFINAAK	I
1	gi|242253868	trypsinogen precursor [Sus scrofa]	2017	51	3	309963	1	1	1	738.012	2211.02	3	2210.1	0.9183	0	68.83	21	32	1.1e-05	R	LGEHNIDVLEGNEQFINAAK	I
1	gi|242253868	trypsinogen precursor [Sus scrofa]	2017	51	3	309970	1	1	1	738.033	2211.08	3	2210.1	0.9807	0	56.8	18	32	0.00018	R	LGEHNIDVLEGNEQFINAAK	I
1	gi|242253868	trypsinogen precursor [Sus scrofa]	2017	51	3	309972	1	1	1	738.038	2211.09	3	2210.1	0.9948	0	41.23	19	32	0.0066	R	LGEHNIDVLEGNEQFINAAK	I
1	gi|242253868	trypsinogen precursor [Sus scrofa]	2017	51	3	309980	1	1	1	1106.6	2211.19	2	2210.1	1.0947	0	103.36	26	32	4e-09	R	LGEHNIDVLEGNEQFINAAK	I
1	gi|242253868	trypsinogen precursor [Sus scrofa]	2017	51	3	309984	1	1	1	738.08	2211.22	3	2210.1	1.1226	0	60.63	21	32	7.6e-05	R	LGEHNIDVLEGNEQFINAAK	I
1	gi|242253868	trypsinogen precursor [Sus scrofa]	2017	51	3	309985	1	1	1	738.082	2211.22	3	2210.1	1.1262	0	71.22	25	32	6.6e-06	R	LGEHNIDVLEGNEQFINAAK	I
1	gi|242253868	trypsinogen precursor [Sus scrofa]	2017	51	3	309988	1	1	1	738.097	2211.27	3	2210.1	1.1739	0	35.61	25	32	0.024	R	LGEHNIDVLEGNEQFINAAK	I
1	gi|242253868	trypsinogen precursor [Sus scrofa]	2017	51	3	309989	1	1	1	738.099	2211.28	3	2210.1	1.1793	0	48.62	20	32	0.0012	R	LGEHNIDVLEGNEQFINAAK	I
1	gi|242253868	trypsinogen precursor [Sus scrofa]	2017	51	3	309990	1	1	1	738.105	2211.29	3	2210.1	1.1976	0	65.46	24	32	2.5e-05	R	LGEHNIDVLEGNEQFINAAK	I
1	gi|242253868	trypsinogen precursor [Sus scrofa]	2017	51	3	309992	1	1	1	738.111	2211.31	3	2210.1	1.2153	0	59.8	21	32	9.1e-05	R	LGEHNIDVLEGNEQFINAAK	I
1	gi|242253868	trypsinogen precursor [Sus scrofa]	2017	51	3	309998	1	1	1	1106.7	2211.38	2	2210.1	1.2807	0	104.58	26	32	3e-09	R	LGEHNIDVLEGNEQFINAAK	I
1	gi|242253868	trypsinogen precursor [Sus scrofa]	2017	51	3	315232	1	1	1	761.713	2282.12	3	2282.17	-0.0557	0	48.31	22	32	0.0012	K	IITHPNFNGNTLDNDIMLIK	L
1	gi|242253868	trypsinogen precursor [Sus scrofa]	2017	51	3	315235	1	1	1	761.718	2282.13	3	2282.17	-0.041	0	36.78	23	32	0.017	K	IITHPNFNGNTLDNDIMLIK	L
1	gi|242253868	trypsinogen precursor [Sus scrofa]	2017	51	3	315250	1	1	1	761.817	2282.43	3	2282.17	0.2572	0	17.22	18	31	1.5	K	IITHPNFNGNTLDNDIMLIK	L
1	gi|242253868	trypsinogen precursor [Sus scrofa]	2017	51	3	315252	1	1	1	761.819	2282.44	3	2282.17	0.2632	0	33.51	22	31	0.035	K	IITHPNFNGNTLDNDIMLIK	L
1	gi|242253868	trypsinogen precursor [Sus scrofa]	2017	51	3	315256	1	1	1	761.859	2282.56	3	2282.17	0.3832	0	38.85	24	31	0.0088	K	IITHPNFNGNTLDNDIMLIK	L
1	gi|242253868	trypsinogen precursor [Sus scrofa]	2017	51	3	316279	1	1	1	1149.85	2297.69	2	2298.17	-0.4744	0	61.02		31	5.1e-05	K	IITHPNFNGNTLDNDIMLIK	L
1	gi|242253868	trypsinogen precursor [Sus scrofa]	2017	51	3	316389	1	1	1	767.317	2298.93	3	2298.17	0.7608	0	42.18	28	32	0.0052	K	IITHPNFNGNTLDNDIMLIK	L
1	gi|242253868	trypsinogen precursor [Sus scrofa]	2017	51	3	316422	1	1	1	767.472	2299.4	3	2298.17	1.2273	0	17.27	26	32	1.6	K	IITHPNFNGNTLDNDIMLIK	L	emPAI	1.29
8	gi|114703738	deleted in malignant brain tumors 1 protein precursor [Sus scrofa]	244	8	3	121161	1	1	1	512.454	1022.89	2	1022.54	0.3538	0	57.38		34	0.00027	R	FISDVSVTR	A
8	gi|114703738	deleted in malignant brain tumors 1 protein precursor [Sus scrofa]	244	8	3	121201	1	1	1	512.543	1023.07	2	1022.54	0.5328	0	59.81		33	0.00012	R	FISDVSVTR	A
8	gi|114703738	deleted in malignant brain tumors 1 protein precursor [Sus scrofa]	244	8	3	207292	1	1	1	743.76	1485.51	2	1486.78	-1.2718	0	15.37	15	34	4	R	FGQGSGPILLDDLR	C
8	gi|114703738	deleted in malignant brain tumors 1 protein precursor [Sus scrofa]	244	8	3	207353	1	1	1	744.06	1486.1	2	1486.78	-0.6734	0	23.77	25	34	0.54	R	FGQGSGPILLDDLR	C
8	gi|114703738	deleted in malignant brain tumors 1 protein precursor [Sus scrofa]	244	8	3	207425	1	1	1	744.327	1486.64	2	1486.78	-0.1388	0	28.89	24	34	0.18	R	FGQGSGPILLDDLR	C
8	gi|114703738	deleted in malignant brain tumors 1 protein precursor [Sus scrofa]	244	8	3	207463	1	1	1	744.522	1487.03	2	1486.78	0.2512	0	19.11	18	34	1.7	R	FGQGSGPILLDDLR	C
8	gi|114703738	deleted in malignant brain tumors 1 protein precursor [Sus scrofa]	244	8	3	207467	1	1	1	744.538	1487.06	2	1486.78	0.283	0	73.24		34	6.4e-06	R	FGQGSGPILLDDLR	C
8	gi|114703738	deleted in malignant brain tumors 1 protein precursor [Sus scrofa]	244	8	3	207469	1	1	1	744.547	1487.08	2	1486.78	0.3006	0	17.63	19	34	2.3	R	FGQGSGPILLDDLR	C
8	gi|114703738	deleted in malignant brain tumors 1 protein precursor [Sus scrofa]	244	8	3	207488	1	1	1	744.606	1487.2	2	1486.78	0.4184	0	63.27		33	4.9e-05	R	FGQGSGPILLDDLR	C
8	gi|114703738	deleted in malignant brain tumors 1 protein precursor [Sus scrofa]	244	8	3	207506	1	1	1	744.701	1487.39	2	1486.78	0.6098	0	48.44	28	33	0.0018	R	FGQGSGPILLDDLR	C
8	gi|114703738	deleted in malignant brain tumors 1 protein precursor [Sus scrofa]	244	8	3	207573	1	1	1	744.943	1487.87	2	1486.78	1.0936	0	15.84	24	34	3.5	R	FGQGSGPILLDDLR	C
8	gi|114703738	deleted in malignant brain tumors 1 protein precursor [Sus scrofa]	244	8	3	207579	1	1	1	744.955	1487.89	2	1486.78	1.1168	0	31.01	24	34	0.11	R	FGQGSGPILLDDLR	C
8	gi|114703738	deleted in malignant brain tumors 1 protein precursor [Sus scrofa]	244	8	3	207596	1	1	1	744.986	1487.96	2	1486.78	1.18	0	24.56	23	34	0.47	R	FGQGSGPILLDDLR	C
8	gi|114703738	deleted in malignant brain tumors 1 protein precursor [Sus scrofa]	244	8	3	207603	1	1	1	744.998	1487.98	2	1486.78	1.2038	0	32.65	24	34	0.074	R	FGQGSGPILLDDLR	C
8	gi|114703738	deleted in malignant brain tumors 1 protein precursor [Sus scrofa]	244	8	3	207608	1	1	1	745.007	1488	2	1486.78	1.222	0	30.25	20	34	0.13	R	FGQGSGPILLDDLR	C
8	gi|114703738	deleted in malignant brain tumors 1 protein precursor [Sus scrofa]	244	8	3	207619	1	1	1	745.032	1488.05	2	1486.78	1.2716	0	37.15	28	34	0.025	R	FGQGSGPILLDDLR	C
8	gi|114703738	deleted in malignant brain tumors 1 protein precursor [Sus scrofa]	244	8	3	298352	1	1	1	696.549	2086.63	3	2087.92	-1.2958	1	39.19	21	31	0.0092	R	SGCVKDETYQSYSQPSPR	I
8	gi|114703738	deleted in malignant brain tumors 1 protein precursor [Sus scrofa]	244	8	3	298459	1	1	1	697.243	2088.71	3	2087.92	0.7856	1	36.99	20	32	0.019	R	SGCVKDETYQSYSQPSPR	I
8	gi|114703738	deleted in malignant brain tumors 1 protein precursor [Sus scrofa]	244	8	3	298531	1	1	1	697.371	2089.09	3	2087.92	1.1708	1	21.85	23	32	0.65	R	SGCVKDETYQSYSQPSPR	I	emPAI	0.07
9	gi|329744642	glyceraldehyde-3-phosphate dehydrogenase [Sus scrofa]	212	21	3	92253	1	1	0	795.252	794.245	1	794.411	-0.1658	0	16.28	26	34	3.7	K	LTGMAFR	V
9	gi|329744642	glyceraldehyde-3-phosphate dehydrogenase [Sus scrofa]	212	21	3	92254	1	1	0	795.255	794.248	1	794.411	-0.1632	0	21.97	26	34	1	K	LTGMAFR	V
9	gi|329744642	glyceraldehyde-3-phosphate dehydrogenase [Sus scrofa]	212	21	3	92256	1	1	0	795.286	794.279	1	794.411	-0.1324	0	18.45	24	34	2.2	K	LTGMAFR	V
9	gi|329744642	glyceraldehyde-3-phosphate dehydrogenase [Sus scrofa]	212	21	3	92259	1	1	0	795.313	794.306	1	794.411	-0.1051	0	21.58	26	34	1.1	K	LTGMAFR	V
9	gi|329744642	glyceraldehyde-3-phosphate dehydrogenase [Sus scrofa]	212	21	3	92264	1	1	0	795.338	794.33	1	794.411	-0.0806	0	28.04	26	34	0.25	K	LTGMAFR	V
9	gi|329744642	glyceraldehyde-3-phosphate dehydrogenase [Sus scrofa]	212	21	3	92266	1	1	0	398.183	794.351	2	794.411	-0.0598	0	29.56	27	34	0.17	K	LTGMAFR	V
9	gi|329744642	glyceraldehyde-3-phosphate dehydrogenase [Sus scrofa]	212	21	3	92267	1	1	0	795.361	794.353	1	794.411	-0.0575	0	22.01	24	34	0.99	K	LTGMAFR	V
9	gi|329744642	glyceraldehyde-3-phosphate dehydrogenase [Sus scrofa]	212	21	3	92268	1	1	0	795.362	794.355	1	794.411	-0.0558	0	21.67	27	34	1.1	K	LTGMAFR	V
9	gi|329744642	glyceraldehyde-3-phosphate dehydrogenase [Sus scrofa]	212	21	3	92269	1	1	0	795.37	794.362	1	794.411	-0.0484	0	18.85	27	34	2	K	LTGMAFR	V
9	gi|329744642	glyceraldehyde-3-phosphate dehydrogenase [Sus scrofa]	212	21	3	92271	1	1	0	795.381	794.374	1	794.411	-0.0373	0	21.5	25	34	1.1	K	LTGMAFR	V
9	gi|329744642	glyceraldehyde-3-phosphate dehydrogenase [Sus scrofa]	212	21	3	92279	1	1	0	398.283	794.552	2	794.411	0.1412	0	33.61	27	34	0.068	K	LTGMAFR	V
9	gi|329744642	glyceraldehyde-3-phosphate dehydrogenase [Sus scrofa]	212	21	3	92286	1	1	0	398.337	794.66	2	794.411	0.249	0	38.07	30	34	0.024	K	LTGMAFR	V
9	gi|329744642	glyceraldehyde-3-phosphate dehydrogenase [Sus scrofa]	212	21	3	92288	1	1	0	398.362	794.709	2	794.411	0.298	0	26.97	30	34	0.31	K	LTGMAFR	V
9	gi|329744642	glyceraldehyde-3-phosphate dehydrogenase [Sus scrofa]	212	21	3	92289	1	1	0	398.378	794.742	2	794.411	0.3312	0	39.07	30	34	0.019	K	LTGMAFR	V
9	gi|329744642	glyceraldehyde-3-phosphate dehydrogenase [Sus scrofa]	212	21	3	92290	1	1	0	398.382	794.748	2	794.411	0.3376	0	36.3	27	34	0.035	K	LTGMAFR	V
9	gi|329744642	glyceraldehyde-3-phosphate dehydrogenase [Sus scrofa]	212	21	3	92292	1	1	0	398.391	794.767	2	794.411	0.3558	0	33.63	26	34	0.062	K	LTGMAFR	V
9	gi|329744642	glyceraldehyde-3-phosphate dehydrogenase [Sus scrofa]	212	21	3	92294	1	1	0	398.408	794.801	2	794.411	0.3906	0	36.4	28	34	0.029	K	LTGMAFR	V
9	gi|329744642	glyceraldehyde-3-phosphate dehydrogenase [Sus scrofa]	212	21	3	92296	1	1	0	398.425	794.835	2	794.411	0.4244	0	37.81	29	33	0.019	K	LTGMAFR	V
9	gi|329744642	glyceraldehyde-3-phosphate dehydrogenase [Sus scrofa]	212	21	3	92299	1	1	0	398.435	794.856	2	794.411	0.4448	0	38.05	32	33	0.017	K	LTGMAFR	V
9	gi|329744642	glyceraldehyde-3-phosphate dehydrogenase [Sus scrofa]	212	21	3	92300	1	1	0	398.45	794.886	2	794.411	0.475	0	40.15	29	33	0.01	K	LTGMAFR	V
9	gi|329744642	glyceraldehyde-3-phosphate dehydrogenase [Sus scrofa]	212	21	3	92302	1	1	0	398.459	794.903	2	794.411	0.4926	0	20.11	25	33	1	K	LTGMAFR	V
9	gi|329744642	glyceraldehyde-3-phosphate dehydrogenase [Sus scrofa]	212	21	3	92308	1	1	0	398.481	794.946	2	794.411	0.5356	0	39.64	29	33	0.012	K	LTGMAFR	V
9	gi|329744642	glyceraldehyde-3-phosphate dehydrogenase [Sus scrofa]	212	21	3	92312	1	1	0	398.491	794.967	2	794.411	0.5564	0	37.67	27	33	0.019	K	LTGMAFR	V
9	gi|329744642	glyceraldehyde-3-phosphate dehydrogenase [Sus scrofa]	212	21	3	92323	2	1	0	398.509	795.004	2	794.411	0.593	0	13.5	27	34	5.6	K	LTGMAFR	V
9	gi|329744642	glyceraldehyde-3-phosphate dehydrogenase [Sus scrofa]	212	21	3	92357	1	1	0	398.578	795.142	2	794.411	0.7308	0	20.24	26	34	1.4	K	LTGMAFR	V
9	gi|329744642	glyceraldehyde-3-phosphate dehydrogenase [Sus scrofa]	212	21	3	92368	1	1	0	398.597	795.179	2	794.411	0.7678	0	15.35	25	34	4.5	K	LTGMAFR	V
9	gi|329744642	glyceraldehyde-3-phosphate dehydrogenase [Sus scrofa]	212	21	3	92371	1	1	0	398.603	795.191	2	794.411	0.7798	0	14.24	25	34	5.7	K	LTGMAFR	V
9	gi|329744642	glyceraldehyde-3-phosphate dehydrogenase [Sus scrofa]	212	21	3	93578	1	1	0	406.015	810.016	2	810.406	-0.3896	0	13.01	23	33	5.9	K	LTGMAFR	V
9	gi|329744642	glyceraldehyde-3-phosphate dehydrogenase [Sus scrofa]	212	21	3	93598	1	1	0	811.297	810.289	1	810.406	-0.1165	0	15.37	27	34	4.2	K	LTGMAFR	V
9	gi|329744642	glyceraldehyde-3-phosphate dehydrogenase [Sus scrofa]	212	21	3	93608	1	1	0	811.4	810.393	1	810.406	-0.0133	0	17.26	27	34	2.7	K	LTGMAFR	V
9	gi|329744642	glyceraldehyde-3-phosphate dehydrogenase [Sus scrofa]	212	21	3	93625	1	1	0	406.33	810.646	2	810.406	0.2406	0	35.79	31	34	0.038	K	LTGMAFR	V
9	gi|329744642	glyceraldehyde-3-phosphate dehydrogenase [Sus scrofa]	212	21	3	93628	1	1	0	406.367	810.719	2	810.406	0.3128	0	42.25		34	0.0085	K	LTGMAFR	V
9	gi|329744642	glyceraldehyde-3-phosphate dehydrogenase [Sus scrofa]	212	21	3	93637	1	1	0	406.386	810.758	2	810.406	0.352	0	39.22		34	0.016	K	LTGMAFR	V
9	gi|329744642	glyceraldehyde-3-phosphate dehydrogenase [Sus scrofa]	212	21	3	93641	1	1	0	406.411	810.808	2	810.406	0.4022	0	37.08		33	0.024	K	LTGMAFR	V
9	gi|329744642	glyceraldehyde-3-phosphate dehydrogenase [Sus scrofa]	212	21	3	93643	2	1	0	406.418	810.821	2	810.406	0.4156	0	13.71	27	33	5	K	LTGMAFR	V
9	gi|329744642	glyceraldehyde-3-phosphate dehydrogenase [Sus scrofa]	212	21	3	93646	1	1	0	406.423	810.831	2	810.406	0.4252	0	33.1	31	33	0.056	K	LTGMAFR	V
9	gi|329744642	glyceraldehyde-3-phosphate dehydrogenase [Sus scrofa]	212	21	3	93648	1	1	0	406.429	810.844	2	810.406	0.4384	0	39.58	32	33	0.012	K	LTGMAFR	V
9	gi|329744642	glyceraldehyde-3-phosphate dehydrogenase [Sus scrofa]	212	21	3	93652	1	1	0	406.447	810.879	2	810.406	0.473	0	39.2		33	0.012	K	LTGMAFR	V
9	gi|329744642	glyceraldehyde-3-phosphate dehydrogenase [Sus scrofa]	212	21	3	93653	1	1	0	406.45	810.885	2	810.406	0.479	0	43.64		33	0.0044	K	LTGMAFR	V
9	gi|329744642	glyceraldehyde-3-phosphate dehydrogenase [Sus scrofa]	212	21	3	93654	1	1	0	406.452	810.889	2	810.406	0.4836	0	21.54	26	33	0.71	K	LTGMAFR	V
9	gi|329744642	glyceraldehyde-3-phosphate dehydrogenase [Sus scrofa]	212	21	3	93655	2	1	0	406.453	810.892	2	810.406	0.4864	0	14.38	28	33	3.7	K	LTGMAFR	V
9	gi|329744642	glyceraldehyde-3-phosphate dehydrogenase [Sus scrofa]	212	21	3	93657	1	1	0	406.458	810.901	2	810.406	0.4952	0	41.4		33	0.0073	K	LTGMAFR	V
9	gi|329744642	glyceraldehyde-3-phosphate dehydrogenase [Sus scrofa]	212	21	3	93665	1	1	0	406.496	810.977	2	810.406	0.571	0	26.37	28	33	0.24	K	LTGMAFR	V
9	gi|329744642	glyceraldehyde-3-phosphate dehydrogenase [Sus scrofa]	212	21	3	93666	1	1	0	406.496	810.978	2	810.406	0.5724	0	32.49	31	33	0.06	K	LTGMAFR	V
9	gi|329744642	glyceraldehyde-3-phosphate dehydrogenase [Sus scrofa]	212	21	3	99816	1	1	1	869.313	868.306	1	868.502	-0.196	0	35.95	30	34	0.038	K	VIPELNGK	L
9	gi|329744642	glyceraldehyde-3-phosphate dehydrogenase [Sus scrofa]	212	21	3	99823	1	1	1	869.349	868.342	1	868.502	-0.1597	0	35.96		34	0.038	K	VIPELNGK	L
9	gi|329744642	glyceraldehyde-3-phosphate dehydrogenase [Sus scrofa]	212	21	3	99834	1	1	1	869.421	868.413	1	868.502	-0.0883	0	21.12	25	34	1.2	K	VIPELNGK	L
9	gi|329744642	glyceraldehyde-3-phosphate dehydrogenase [Sus scrofa]	212	21	3	99872	1	1	1	435.41	868.805	2	868.502	0.3036	0	31.35	31	34	0.1	K	VIPELNGK	L
9	gi|329744642	glyceraldehyde-3-phosphate dehydrogenase [Sus scrofa]	212	21	3	99878	1	1	1	435.445	868.876	2	868.502	0.374	0	25.62	23	33	0.31	K	VIPELNGK	L
9	gi|329744642	glyceraldehyde-3-phosphate dehydrogenase [Sus scrofa]	212	21	3	235959	1	1	1	549.484	1645.43	3	1644.9	0.5283	1	15.13	17	33	3.1	K	VIPELNGKLTGMAFR	V
9	gi|329744642	glyceraldehyde-3-phosphate dehydrogenase [Sus scrofa]	212	21	3	265369	1	1	0	910.714	1819.41	2	1818.9	0.5159	0	43.24		32	0.0041	K	IVSNASCTTNCLAPLAK	V
9	gi|329744642	glyceraldehyde-3-phosphate dehydrogenase [Sus scrofa]	212	21	3	265449	1	1	0	910.943	1819.87	2	1818.9	0.9741	0	21.5		33	0.85	K	IVSNASCTTNCLAPLAK	V	emPAI	0.69
13	gi|346421372	ferritin, light polypeptide [Sus scrofa]	140	5	3	61993	2	1	1	577.339	576.332	1	576.25	0.0816	0	13.01	27	36	11	R	EGSER	L
13	gi|346421372	ferritin, light polypeptide [Sus scrofa]	140	5	3	62089	1	1	1	577.491	576.483	1	576.25	0.2331	0	16.38	26	36	5	R	EGSER	L
13	gi|346421372	ferritin, light polypeptide [Sus scrofa]	140	5	3	157806	2	1	1	614.967	1227.92	2	1227.61	0.3048	1	15.3	29	34	4.6	K	MGDHLTNLRR	L
13	gi|346421372	ferritin, light polypeptide [Sus scrofa]	140	5	3	233744	1	1	1	817.885	1633.75	2	1633.89	-0.1353	0	29.33	22	33	0.14	K	GLNQALVDLHALGSAR	A
13	gi|346421372	ferritin, light polypeptide [Sus scrofa]	140	5	3	233766	1	1	1	818.037	1634.06	2	1633.89	0.1689	0	45.53	25	33	0.0033	K	GLNQALVDLHALGSAR	A
13	gi|346421372	ferritin, light polypeptide [Sus scrofa]	140	5	3	233829	1	1	1	545.905	1634.69	3	1633.89	0.8041	0	45.08	26	33	0.0037	K	GLNQALVDLHALGSAR	A
13	gi|346421372	ferritin, light polypeptide [Sus scrofa]	140	5	3	233842	1	1	1	545.957	1634.85	3	1633.89	0.9601	0	43.34	28	33	0.0055	K	GLNQALVDLHALGSAR	A
13	gi|346421372	ferritin, light polypeptide [Sus scrofa]	140	5	3	234140	1	1	1	819.176	1636.34	2	1635.83	0.5116	0	45.48	16	32	0.0025	R	LSGPQAGLGEYLFER	L
13	gi|346421372	ferritin, light polypeptide [Sus scrofa]	140	5	3	273270	1	1	1	626.211	1875.61	3	1874.92	0.6937	0	47.52	22	32	0.0017	R	ALFQDVQKPSQDEWGK	T	emPAI	0.85
17	gi|350580796	PREDICTED: hypothetical protein LOC100522363 [Sus scrofa]	118	3	3	140588	1	1	1	568.636	1135.26	2	1135.53	-0.2675	0	25.44	24	35	0.47	R	SISQNGYDPR	Q
17	gi|350580796	PREDICTED: hypothetical protein LOC100522363 [Sus scrofa]	118	3	3	140634	1	1	1	568.811	1135.61	2	1135.53	0.0817	0	26.19	28	35	0.41	R	SISQNGYDPR	Q
17	gi|350580796	PREDICTED: hypothetical protein LOC100522363 [Sus scrofa]	118	3	3	220244	1	1	1	777.704	1553.39	2	1552.86	0.5362	0	37.28	21	33	0.021	R	QNLNDVLLLQLDR	E
17	gi|350580796	PREDICTED: hypothetical protein LOC100522363 [Sus scrofa]	118	3	3	222343	1	1	1	522.8	1565.38	3	1564.8	0.5746	0	75.45		33	2.9e-06	K	QGRPFCAGALVHPR	F
17	gi|350580796	PREDICTED: hypothetical protein LOC100522363 [Sus scrofa]	118	3	3	222448	1	1	1	523.011	1566.01	3	1564.8	1.2079	0	14.49	20	33	4.4	K	QGRPFCAGALVHPR	F
17	gi|350580796	PREDICTED: hypothetical protein LOC100522363 [Sus scrofa]	118	3	3	228754	1	1	1	803.123	1604.23	2	1602.84	1.3903	0	21.53	20	32	0.67	R	AQPQEFPFLASIQK	Q
17	gi|350580796	PREDICTED: hypothetical protein LOC100522363 [Sus scrofa]	118	3	3	229622	1	1	1	537.569	1609.69	3	1609.89	-0.2045	1	13.05	23	33	6	R	RAELVELAAAAAGAAAR	R
17	gi|350580796	PREDICTED: hypothetical protein LOC100522363 [Sus scrofa]	118	3	3	270392	1	1	1	930.035	1858.06	2	1858.97	-0.9159	0	14.97	27	33	3.4	R	GTPLVCNGLAQGVASFLR	R
17	gi|350580796	PREDICTED: hypothetical protein LOC100522363 [Sus scrofa]	118	3	3	270665	1	1	1	930.627	1859.24	2	1858.97	0.2665	0	53.86	22	33	0.00042	R	GTPLVCNGLAQGVASFLR	R	emPAI	0.3
20	gi|350583970	PREDICTED: keratin, type II cytoskeletal 75-like [Sus scrofa]	115	9	3	111399	4	1	0	487.366	972.718	2	971.54	1.1781	1	17.21	34	36	3.9	R	GELALKDAR	A
20	gi|350583970	PREDICTED: keratin, type II cytoskeletal 75-like [Sus scrofa]	115	9	3	129476	1	1	0	541.203	1080.39	2	1081.59	-1.2006	1	35.74	27	34	0.041	K	FASFIDKVR	F
20	gi|350583970	PREDICTED: keratin, type II cytoskeletal 75-like [Sus scrofa]	115	9	3	134846	1	1	1	369.96	1106.86	3	1107.6	-0.7467	1	20.96	32	35	1.3	R	SLYNLGGTKR	V
20	gi|350583970	PREDICTED: keratin, type II cytoskeletal 75-like [Sus scrofa]	115	9	3	134982	1	1	1	370.3	1107.88	3	1107.6	0.2736	1	15.28	27	35	4.7	R	SLYNLGGTKR	V
20	gi|350583970	PREDICTED: keratin, type II cytoskeletal 75-like [Sus scrofa]	115	9	3	141497	1	1	1	572.308	1142.6	2	1142.62	-0.0168	0	15.58	21	35	4.9	K	LVDLEDALQK	A
20	gi|350583970	PREDICTED: keratin, type II cytoskeletal 75-like [Sus scrofa]	115	9	3	172637	1	1	1	652.18	1302.35	2	1301.71	0.6384	0	52.5	29	34	0.00084	R	SLDLDSIIAEVK	A
20	gi|350583970	PREDICTED: keratin, type II cytoskeletal 75-like [Sus scrofa]	115	9	3	172647	1	1	1	652.2	1302.39	2	1301.71	0.6784	0	35.53	29	34	0.042	R	SLDLDSIIAEVK	A
20	gi|350583970	PREDICTED: keratin, type II cytoskeletal 75-like [Sus scrofa]	115	9	3	172651	1	1	1	652.204	1302.39	2	1301.71	0.6856	0	52.59	32	34	0.00084	R	SLDLDSIIAEVK	A
20	gi|350583970	PREDICTED: keratin, type II cytoskeletal 75-like [Sus scrofa]	115	9	3	172662	1	1	1	652.222	1302.43	2	1301.71	0.7222	0	40.5	33	34	0.014	R	SLDLDSIIAEVK	A
20	gi|350583970	PREDICTED: keratin, type II cytoskeletal 75-like [Sus scrofa]	115	9	3	172673	1	1	1	652.238	1302.46	2	1301.71	0.7534	0	40.15	31	34	0.015	R	SLDLDSIIAEVK	A
20	gi|350583970	PREDICTED: keratin, type II cytoskeletal 75-like [Sus scrofa]	115	9	3	172698	1	1	1	652.29	1302.57	2	1301.71	0.8574	0	22.95	25	34	0.77	R	SLDLDSIIAEVK	A
20	gi|350583970	PREDICTED: keratin, type II cytoskeletal 75-like [Sus scrofa]	115	9	3	172802	1	1	1	652.485	1302.96	2	1301.71	1.248	0	17.59	27	34	2.6	R	SLDLDSIIAEVK	A
20	gi|350583970	PREDICTED: keratin, type II cytoskeletal 75-like [Sus scrofa]	115	9	3	205564	3	0	0	738.465	1474.92	2	1475.8	-0.8823	1	28.5		34	0.19	R	FLEQQNKVLETK	W
20	gi|350583970	PREDICTED: keratin, type II cytoskeletal 75-like [Sus scrofa]	115	9	3	205572	3	0	0	738.488	1474.96	2	1475.8	-0.8365	1	32.69		34	0.072	R	FLEQQNKVLETK	W
20	gi|350583970	PREDICTED: keratin, type II cytoskeletal 75-like [Sus scrofa]	115	9	3	205576	3	0	0	738.494	1474.97	2	1475.8	-0.8259	1	34.03		34	0.053	R	FLEQQNKVLETK	W
20	gi|350583970	PREDICTED: keratin, type II cytoskeletal 75-like [Sus scrofa]	115	9	3	205604	3	0	0	738.604	1475.19	2	1475.8	-0.6041	1	36.99		32	0.02	R	FLEQQNKVLETK	W
20	gi|350583970	PREDICTED: keratin, type II cytoskeletal 75-like [Sus scrofa]	115	9	3	205786	1	1	0	739.285	1476.56	2	1475.8	0.7569	1	36.33		34	0.032	R	FLEQQNKVLETK	W	emPAI	0.17
56	gi|311255411	PREDICTED: LOW QUALITY PROTEIN: keratin, type II cytoskeletal 4 [Sus scrofa]	49	5	3	67243	1	1	0	617.292	616.284	1	616.318	-0.0337	0	17.82	25	38	5.9	K	EELAR	M
56	gi|311255411	PREDICTED: LOW QUALITY PROTEIN: keratin, type II cytoskeletal 4 [Sus scrofa]	49	5	3	111418	2	0	1	487.552	973.089	2	973.483	-0.3936	0	37.47		35	0.029	K	NEISELNR	M
56	gi|311255411	PREDICTED: LOW QUALITY PROTEIN: keratin, type II cytoskeletal 4 [Sus scrofa]	49	5	3	129476	1	0	0	541.203	1080.39	2	1081.59	-1.2006	1	35.74	27	34	0.041	K	FASFIDKVR	F
56	gi|311255411	PREDICTED: LOW QUALITY PROTEIN: keratin, type II cytoskeletal 4 [Sus scrofa]	49	5	3	143260	1	1	1	385.288	1152.84	3	1151.58	1.2609	1	22.31	24	34	0.9	R	GEAALKDAYSK	R
56	gi|311255411	PREDICTED: LOW QUALITY PROTEIN: keratin, type II cytoskeletal 4 [Sus scrofa]	49	5	3	205564	3	0	0	738.465	1474.92	2	1475.8	-0.8823	1	28.5		34	0.19	R	FLEQQNKVLETK	W
56	gi|311255411	PREDICTED: LOW QUALITY PROTEIN: keratin, type II cytoskeletal 4 [Sus scrofa]	49	5	3	205572	3	0	0	738.488	1474.96	2	1475.8	-0.8365	1	32.69		34	0.072	R	FLEQQNKVLETK	W
56	gi|311255411	PREDICTED: LOW QUALITY PROTEIN: keratin, type II cytoskeletal 4 [Sus scrofa]	49	5	3	205576	3	0	0	738.494	1474.97	2	1475.8	-0.8259	1	34.03		34	0.053	R	FLEQQNKVLETK	W
56	gi|311255411	PREDICTED: LOW QUALITY PROTEIN: keratin, type II cytoskeletal 4 [Sus scrofa]	49	5	3	205604	3	0	0	738.604	1475.19	2	1475.8	-0.6041	1	36.99		32	0.02	R	FLEQQNKVLETK	W
56	gi|311255411	PREDICTED: LOW QUALITY PROTEIN: keratin, type II cytoskeletal 4 [Sus scrofa]	49	5	3	205786	1	0	0	739.285	1476.56	2	1475.8	0.7569	1	36.33		34	0.032	R	FLEQQNKVLETK	W
56	gi|311255411	PREDICTED: LOW QUALITY PROTEIN: keratin, type II cytoskeletal 4 [Sus scrofa]	49	5	3	225110	1	1	1	528.668	1582.98	3	1581.66	1.3205	0	19.33	19	34	1.5	-	MTSVGVFMDMFNR	C	emPAI	0.21
5	gi|350583977	PREDICTED: keratin, type II cytoskeletal 1 [Sus scrofa]	408	14	4	79010	4	1	1	352.13	702.246	2	702.352	-0.1063	1	13.79	32	37	11	R	RSGGGGGR	F
5	gi|350583977	PREDICTED: keratin, type II cytoskeletal 1 [Sus scrofa]	408	14	4	111418	1	1	1	487.552	973.089	2	972.524	0.5653	0	46.17		35	0.0039	K	IEISELNR	V
5	gi|350583977	PREDICTED: keratin, type II cytoskeletal 1 [Sus scrofa]	408	14	4	122787	2	1	1	517.335	1032.65	2	1032.51	0.1463	0	13.26	27	35	9	R	TLLEGEESR	M
5	gi|350583977	PREDICTED: keratin, type II cytoskeletal 1 [Sus scrofa]	408	14	4	122921	1	1	1	517.54	1033.07	2	1032.51	0.5571	0	23.84		34	0.53	R	TLLEGEESR	M
5	gi|350583977	PREDICTED: keratin, type II cytoskeletal 1 [Sus scrofa]	408	14	4	187866	1	1	1	692.185	1382.36	2	1382.68	-0.3278	0	68.01	29	34	2.1e-05	K	SLNNQFASFIDK	V
5	gi|350583977	PREDICTED: keratin, type II cytoskeletal 1 [Sus scrofa]	408	14	4	187867	1	1	1	692.187	1382.36	2	1382.68	-0.3232	0	61.66	22	34	9e-05	K	SLNNQFASFIDK	V
5	gi|350583977	PREDICTED: keratin, type II cytoskeletal 1 [Sus scrofa]	408	14	4	187889	1	1	1	692.343	1382.67	2	1382.68	-0.012	0	70.1	29	34	1.4e-05	K	SLNNQFASFIDK	V
5	gi|350583977	PREDICTED: keratin, type II cytoskeletal 1 [Sus scrofa]	408	14	4	187900	1	1	1	692.461	1382.91	2	1382.68	0.2236	0	48.76	29	34	0.0019	K	SLNNQFASFIDK	V
5	gi|350583977	PREDICTED: keratin, type II cytoskeletal 1 [Sus scrofa]	408	14	4	187969	1	1	1	692.97	1383.93	2	1382.68	1.2428	0	49.54	23	34	0.0016	K	SLNNQFASFIDK	V
5	gi|350583977	PREDICTED: keratin, type II cytoskeletal 1 [Sus scrofa]	408	14	4	205564	1	1	0	738.465	1474.92	2	1474.78	0.1381	0	41.74		34	0.0089	R	FLEQQNQVLQTK	W
5	gi|350583977	PREDICTED: keratin, type II cytoskeletal 1 [Sus scrofa]	408	14	4	205572	1	1	0	738.488	1474.96	2	1474.78	0.1839	0	43.22		34	0.0064	R	FLEQQNQVLQTK	W
5	gi|350583977	PREDICTED: keratin, type II cytoskeletal 1 [Sus scrofa]	408	14	4	205576	1	1	0	738.494	1474.97	2	1474.78	0.1945	0	53.7		34	0.00057	R	FLEQQNQVLQTK	W
5	gi|350583977	PREDICTED: keratin, type II cytoskeletal 1 [Sus scrofa]	408	14	4	205604	1	1	0	738.604	1475.19	2	1474.78	0.4163	0	64.35		32	3.7e-05	R	FLEQQNQVLQTK	W
5	gi|350583977	PREDICTED: keratin, type II cytoskeletal 1 [Sus scrofa]	408	14	4	234322	1	1	1	546.739	1637.19	3	1637.85	-0.658	1	14.39	17	33	3.8	K	SLNNQFASFIDKVR	F
5	gi|350583977	PREDICTED: keratin, type II cytoskeletal 1 [Sus scrofa]	408	14	4	234386	1	1	1	547.008	1638	3	1637.85	0.1493	1	35.06	22	33	0.038	K	SLNNQFASFIDKVR	F
5	gi|350583977	PREDICTED: keratin, type II cytoskeletal 1 [Sus scrofa]	408	14	4	234411	1	1	1	820.102	1638.19	2	1637.85	0.3375	1	70.56	26	33	9.5e-06	K	SLNNQFASFIDKVR	F
5	gi|350583977	PREDICTED: keratin, type II cytoskeletal 1 [Sus scrofa]	408	14	4	234426	1	1	1	820.148	1638.28	2	1637.85	0.4297	1	74.97	27	32	2.8e-06	K	SLNNQFASFIDKVR	F
5	gi|350583977	PREDICTED: keratin, type II cytoskeletal 1 [Sus scrofa]	408	14	4	234520	1	1	1	820.364	1638.71	2	1637.85	0.8601	1	36.73	18	33	0.026	K	SLNNQFASFIDKVR	F
5	gi|350583977	PREDICTED: keratin, type II cytoskeletal 1 [Sus scrofa]	408	14	4	234594	1	1	1	547.338	1638.99	3	1637.85	1.1384	1	27.98	22	33	0.2	K	SLNNQFASFIDKVR	F
5	gi|350583977	PREDICTED: keratin, type II cytoskeletal 1 [Sus scrofa]	408	14	4	234632	1	1	1	547.41	1639.21	3	1637.85	1.3568	1	26.89	23	33	0.22	K	SLNNQFASFIDKVR	F	emPAI	0.28
6	gi|311252272	PREDICTED: lithostathine-like isoform 1 [Sus scrofa]	282	10	4	181542	1	1	1	678.819	1355.62	2	1355.53	0.0924	0	25.76	28	34	0.4	K	TWMDADMACQK	R
6	gi|311252272	PREDICTED: lithostathine-like isoform 1 [Sus scrofa]	282	10	4	188429	1	1	1	694.447	1386.88	2	1387.52	-0.6402	0	38.04	31	34	0.023	K	TWMDADMACQK	R
6	gi|311252272	PREDICTED: lithostathine-like isoform 1 [Sus scrofa]	282	10	4	247283	1	1	1	854.433	1706.85	2	1706.74	0.1086	0	55.68	30	33	0.00031	R	DYNCYVNLPYVCK	F
6	gi|311252272	PREDICTED: lithostathine-like isoform 1 [Sus scrofa]	282	10	4	247292	1	1	1	854.478	1706.94	2	1706.74	0.1982	0	47.05	31	33	0.0023	R	DYNCYVNLPYVCK	F
6	gi|311252272	PREDICTED: lithostathine-like isoform 1 [Sus scrofa]	282	10	4	247384	1	1	1	854.96	1707.91	2	1706.74	1.1622	0	58.51	31	33	0.00016	R	DYNCYVNLPYVCK	F
6	gi|311252272	PREDICTED: lithostathine-like isoform 1 [Sus scrofa]	282	10	4	251035	1	1	1	867.027	1732.04	2	1731.75	0.2866	0	66.78	24	33	2.4e-05	R	NPSTSSYPGYCGSLSR	N
6	gi|311252272	PREDICTED: lithostathine-like isoform 1 [Sus scrofa]	282	10	4	251185	1	1	1	867.433	1732.85	2	1731.75	1.099	0	58.46	20	33	0.00017	R	NPSTSSYPGYCGSLSR	N
6	gi|311252272	PREDICTED: lithostathine-like isoform 1 [Sus scrofa]	282	10	4	251189	1	1	1	867.452	1732.89	2	1731.75	1.1382	0	63.12	23	33	5.7e-05	R	NPSTSSYPGYCGSLSR	N
6	gi|311252272	PREDICTED: lithostathine-like isoform 1 [Sus scrofa]	282	10	4	251196	1	1	1	867.484	1732.95	2	1731.75	1.2014	0	64.32		33	4.3e-05	R	NPSTSSYPGYCGSLSR	N
6	gi|311252272	PREDICTED: lithostathine-like isoform 1 [Sus scrofa]	282	10	4	293992	1	1	1	684.207	2049.6	3	2048.92	0.677	1	35.28	20	31	0.023	K	WRDYNCYVNLPYVCK	F
6	gi|311252272	PREDICTED: lithostathine-like isoform 1 [Sus scrofa]	282	10	4	294042	1	1	1	684.347	2050.02	3	2048.92	1.0958	1	33.89	23	32	0.04	K	WRDYNCYVNLPYVCK	F	emPAI	0.87
2	gi|335292694	PREDICTED: heat shock-related 70 kDa protein 2-like [Sus scrofa]	792	17	1	238771	1	1	0	830.742	1659.47	2	1658.89	0.5818	0	76.31	24	33	2.6e-06	R	IINEPTAAAIAYGLDK	K
2	gi|335292694	PREDICTED: heat shock-related 70 kDa protein 2-like [Sus scrofa]	792	17	1	238793	1	1	0	554.225	1659.65	3	1658.89	0.7653	0	73.88	33	33	5e-06	R	IINEPTAAAIAYGLDK	K
2	gi|335292694	PREDICTED: heat shock-related 70 kDa protein 2-like [Sus scrofa]	792	17	1	238812	1	1	0	830.896	1659.78	2	1658.89	0.8906	0	90.08	27	33	1.2e-07	R	IINEPTAAAIAYGLDK	K
2	gi|335292694	PREDICTED: heat shock-related 70 kDa protein 2-like [Sus scrofa]	792	17	1	238823	1	1	0	830.917	1659.82	2	1658.89	0.932	0	88.34	27	33	1.8e-07	R	IINEPTAAAIAYGLDK	K
2	gi|335292694	PREDICTED: heat shock-related 70 kDa protein 2-like [Sus scrofa]	792	17	1	238834	1	1	0	830.96	1659.91	2	1658.89	1.018	0	106.33	32	33	2.8e-09	R	IINEPTAAAIAYGLDK	K
2	gi|335292694	PREDICTED: heat shock-related 70 kDa protein 2-like [Sus scrofa]	792	17	1	238873	1	1	0	831.059	1660.1	2	1658.89	1.2148	0	108.69	31	33	1.6e-09	R	IINEPTAAAIAYGLDK	K
2	gi|335292694	PREDICTED: heat shock-related 70 kDa protein 2-like [Sus scrofa]	792	17	1	238896	1	1	0	831.113	1660.21	2	1658.89	1.3242	0	82.2	28	33	6.4e-07	R	IINEPTAAAIAYGLDK	K
2	gi|335292694	PREDICTED: heat shock-related 70 kDa protein 2-like [Sus scrofa]	792	17	1	238901	1	1	0	831.12	1660.22	2	1658.89	1.3368	0	95.85	27	33	2.7e-08	R	IINEPTAAAIAYGLDK	K
2	gi|335292694	PREDICTED: heat shock-related 70 kDa protein 2-like [Sus scrofa]	792	17	1	238912	1	1	0	831.136	1660.26	2	1658.89	1.3688	0	93.37	30	32	4.4e-08	R	IINEPTAAAIAYGLDK	K	emPAI	0.1
3	gi|350579657	PREDICTED: 78 kDa glucose-regulated protein [Sus scrofa]	792	17	1	238771	1	0	0	830.742	1659.47	2	1658.89	0.5818	0	76.31	24	33	2.6e-06	R	IINEPTAAAIAYGLDK	R
3	gi|350579657	PREDICTED: 78 kDa glucose-regulated protein [Sus scrofa]	792	17	1	238793	1	0	0	554.225	1659.65	3	1658.89	0.7653	0	73.88	33	33	5e-06	R	IINEPTAAAIAYGLDK	R
3	gi|350579657	PREDICTED: 78 kDa glucose-regulated protein [Sus scrofa]	792	17	1	238812	1	0	0	830.896	1659.78	2	1658.89	0.8906	0	90.08	27	33	1.2e-07	R	IINEPTAAAIAYGLDK	R
3	gi|350579657	PREDICTED: 78 kDa glucose-regulated protein [Sus scrofa]	792	17	1	238823	1	0	0	830.917	1659.82	2	1658.89	0.932	0	88.34	27	33	1.8e-07	R	IINEPTAAAIAYGLDK	R
3	gi|350579657	PREDICTED: 78 kDa glucose-regulated protein [Sus scrofa]	792	17	1	238834	1	0	0	830.96	1659.91	2	1658.89	1.018	0	106.33	32	33	2.8e-09	R	IINEPTAAAIAYGLDK	R
3	gi|350579657	PREDICTED: 78 kDa glucose-regulated protein [Sus scrofa]	792	17	1	238873	1	0	0	831.059	1660.1	2	1658.89	1.2148	0	108.69	31	33	1.6e-09	R	IINEPTAAAIAYGLDK	R
3	gi|350579657	PREDICTED: 78 kDa glucose-regulated protein [Sus scrofa]	792	17	1	238896	1	0	0	831.113	1660.21	2	1658.89	1.3242	0	82.2	28	33	6.4e-07	R	IINEPTAAAIAYGLDK	R
3	gi|350579657	PREDICTED: 78 kDa glucose-regulated protein [Sus scrofa]	792	17	1	238901	1	0	0	831.12	1660.22	2	1658.89	1.3368	0	95.85	27	33	2.7e-08	R	IINEPTAAAIAYGLDK	R
3	gi|350579657	PREDICTED: 78 kDa glucose-regulated protein [Sus scrofa]	792	17	1	238912	1	0	0	831.136	1660.26	2	1658.89	1.3688	0	93.37	30	32	4.4e-08	R	IINEPTAAAIAYGLDK	R
4	gi|335309396	PREDICTED: adenylate kinase 2, mitochondrial-like isoform 1 [Sus scrofa]	540	17	1	140471	1	1	1	568.331	1134.65	2	1134.58	0.0656	0	68.36	32	35	2.5e-05	K	NGFLLDGFPR	T
4	gi|335309396	PREDICTED: adenylate kinase 2, mitochondrial-like isoform 1 [Sus scrofa]	540	17	1	140499	1	1	1	568.394	1134.77	2	1134.58	0.1906	0	66	29	35	4.3e-05	K	NGFLLDGFPR	T
4	gi|335309396	PREDICTED: adenylate kinase 2, mitochondrial-like isoform 1 [Sus scrofa]	540	17	1	140536	1	1	1	568.495	1134.97	2	1134.58	0.3922	0	68.7	25	34	2e-05	K	NGFLLDGFPR	T
4	gi|335309396	PREDICTED: adenylate kinase 2, mitochondrial-like isoform 1 [Sus scrofa]	540	17	1	140538	1	1	1	568.496	1134.98	2	1134.58	0.3952	0	68.85		34	1.9e-05	K	NGFLLDGFPR	T
4	gi|335309396	PREDICTED: adenylate kinase 2, mitochondrial-like isoform 1 [Sus scrofa]	540	17	1	140543	1	1	1	568.511	1135.01	2	1134.58	0.4246	0	68.19	25	34	2e-05	K	NGFLLDGFPR	T
4	gi|335309396	PREDICTED: adenylate kinase 2, mitochondrial-like isoform 1 [Sus scrofa]	540	17	1	140558	1	1	1	568.544	1135.07	2	1134.58	0.4914	0	61.28	25	33	9e-05	K	NGFLLDGFPR	T
4	gi|335309396	PREDICTED: adenylate kinase 2, mitochondrial-like isoform 1 [Sus scrofa]	540	17	1	140560	1	1	1	568.549	1135.08	2	1134.58	0.5006	0	61.15	29	33	9.2e-05	K	NGFLLDGFPR	T
7	gi|211578396	uncharacterized protein LOC100156145 [Sus scrofa]	263	4	1	314019	1	1	1	1135.46	2268.9	2	2269.09	-0.1922	0	63.27	25	32	4e-05	K	DVALSSGSACTSASLEPSYVLR	A
7	gi|211578396	uncharacterized protein LOC100156145 [Sus scrofa]	263	4	1	314068	1	1	1	1135.64	2269.27	2	2269.09	0.1758	0	104.68	28	32	3e-09	K	DVALSSGSACTSASLEPSYVLR	A
7	gi|211578396	uncharacterized protein LOC100156145 [Sus scrofa]	263	4	1	314156	1	1	1	1135.96	2269.9	2	2269.09	0.8118	0	71.66	21	32	5.7e-06	K	DVALSSGSACTSASLEPSYVLR	A
7	gi|211578396	uncharacterized protein LOC100156145 [Sus scrofa]	263	4	1	314185	1	1	1	1136.11	2270.2	2	2269.09	1.1058	0	102.71		32	4.5e-09	K	DVALSSGSACTSASLEPSYVLR	A	emPAI	0.06
12	gi|343478295	trefoil factor 3 (intestinal) precursor [Sus scrofa]	141	4	1	281345	1	1	1	969.033	1936.05	2	1935.82	0.2301	0	66.97	19	33	2.1e-05	R	VDCGYPQVTPEQCNNR	G
18	gi|194038855	PREDICTED: hypothetical protein LOC100154068 [Sus scrofa]	117	2	1	152721	1	1	1	602.27	1202.53	2	1202.61	-0.0815	0	73.49	29	35	7.3e-06	K	VGIGPGSVCTTR	K
18	gi|194038855	PREDICTED: hypothetical protein LOC100154068 [Sus scrofa]	117	2	1	152803	1	1	1	602.503	1202.99	2	1202.61	0.3835	0	75.48		34	4.2e-06	K	VGIGPGSVCTTR	K
19	gi|47523036	tyrosine-protein kinase JAK1 [Sus scrofa]	115	3	1	102396	1	1	1	450.952	899.889	2	899.544	0.3449	1	65.23		34	4.6e-05	K	KEIEILR	N
22	gi|350584000	PREDICTED: keratin, type II cytoskeletal 78-like [Sus scrofa]	103	4	1	205604	1	0	0	738.604	1475.19	2	1474.78	0.4163	0	64.35		32	3.7e-05	R	FLEQQNQVLQTK	W	emPAI	0.08
28	gi|350593858	PREDICTED: carbamoyl-phosphate synthase [ammonia], mitochondrial isoform 1 [Sus scrofa]	89	2	1	120276	1	1	1	509.957	1017.9	2	1017.53	0.3721	0	66.11	32	35	4.3e-05	K	SVGEVMAIGR	T
29	gi|350579257	PREDICTED: glycine dehydrogenase [decarboxylating], mitochondrial-like [Sus scrofa]	89	2	1	268225	1	1	1	920.555	1839.1	2	1837.9	1.1995	0	60.94	23	33	9.1e-05	K	TFCIPHGGGGPGMGPIGVK	K	emPAI	0.04
31	gi|47523720	glucose-6-phosphate isomerase [Sus scrofa]	82	2	1	244710	1	1	1	846.528	1691.04	2	1691.72	-0.6831	0	61.28	20	33	8.6e-05	R	FAAYFQQGDMESNGK	Y

## Sheet: invivo_EHEC_100414_Protein
Prot ID	Accession	Description	Mascot Score	# PSMs	# Peptides	Pr Coverage	Pr Length	MW (kDa)	pI
1	gi|261245058	hemoglobin subunit beta [Sus scrofa]	4334	135	9	95.2	147	16212	7.1
2	gi|242253868	trypsinogen precursor [Sus scrofa]	2318	51	4	23.6	246	26549	6.85
3	gi|350581842	PREDICTED: hemoglobin subunit alpha-like isoform 1 [Sus scrofa]	1828	56	5	50.7	142	15218	8.74
4	gi|47523946	hemoglobin subunit epsilon [Sus scrofa]	803	34	2	34	147	16141	8.72
5	gi|350583970	PREDICTED: keratin, type II cytoskeletal 75-like [Sus scrofa]	743	20	3	16.3	551	59845	8.45
6	gi|211578396	uncharacterized protein LOC100156145 [Sus scrofa]	704	10	1	11.6	457	50768	8.54
7	gi|349585237	keratin 31 [Sus scrofa]	694	23	7	22.5	414	47874	4.79
8	gi|335297670	PREDICTED: keratin, type I microfibrillar, 47.6 kDa-like [Sus scrofa]	673	21	6	26.1	403	46796	4.73
9	gi|270289746	thyroglobulin precursor [Sus scrofa]	582	21	6	5.1	2692	299851	5.51
10	gi|345441750	heat shock 70kDa protein 8 [Sus scrofa]	577	14	1	8.4	646	71050	5.37
11	gi|350579657	PREDICTED: 78 kDa glucose-regulated protein [Sus scrofa]	577	14	1	7.3	659	73167	5.43
12	gi|178056512	heat shock 70 kDa protein 1-like [Sus scrofa]	577	14	1	5.3	641	70699	6.01
13	gi|311267256	PREDICTED: keratin, type I cuticular Ha2 [Sus scrofa]	548	15	4	13.5	460	52563	4.89
14	gi|350583977	PREDICTED: keratin, type II cytoskeletal 1 [Sus scrofa]	522	15	3	8.1	629	65381	8.18
15	gi|311255373	PREDICTED: keratin, type II cuticular Hb3-like [Sus scrofa]	424	20	9	26	493	55576	5.59
16	gi|350583957	PREDICTED: keratin, type II cuticular Hb4 [Sus scrofa]	380	10	7	28.8	593	64553	8.12
17	gi|350583961	PREDICTED: keratin, type II microfibrillar, component 7C-like [Sus scrofa]	339	14	5	18	495	55135	5.97
18	gi|311267330	PREDICTED: keratin, type I cytoskeletal 10-like [Sus scrofa]	322	14	5	19.1	613	62835	4.98
19	gi|335309396	PREDICTED: adenylate kinase 2, mitochondrial-like isoform 1 [Sus scrofa]	316	10	1	9.2	228	25328	6.24
20	gi|311255377	PREDICTED: keratin, type II cuticular Hb5 [Sus scrofa]	256	11	6	22.5	507	56893	6.41
21	gi|311252272	PREDICTED: lithostathine-like isoform 1 [Sus scrofa]	237	5	3	22.7	176	19853	5.3
22	gi|329744642	glyceraldehyde-3-phosphate dehydrogenase [Sus scrofa]	221	20	2	12.3	333	36041	8.51
23	gi|335297667	PREDICTED: keratin, type I cuticular Ha6 isoform 2 [Sus scrofa]	213	8	4	12.2	459	52340	4.86
24	gi|201066358	phosphoglycerate mutase 2 [Sus scrofa]	202	6	1	11.5	253	28830	8.86
25	gi|114703738	deleted in malignant brain tumors 1 protein precursor [Sus scrofa]	183	6	1	4.4	1349	151127	5.42
27	gi|194038855	PREDICTED: hypothetical protein LOC100154068 [Sus scrofa]	167	3	1	7.2	348	38394	6.8
28	gi|335287804	PREDICTED: keratin, type II microfibrillar, component 7C-like [Sus scrofa]	165	7	4	21.6	477	53787	8.06
30	gi|47523720	glucose-6-phosphate isomerase [Sus scrofa]	130	3	2	6.3	558	63257	7.79
32	gi|47523546	myoglobin [Sus scrofa]	110	10	2	39	154	17074	6.75
36	gi|47523278	resistin precursor [Sus scrofa]	94	3	2	22	109	12312	8.03
37	gi|335281875	PREDICTED: proteoglycan 3-like [Sus scrofa]	93	5	2	15.2	224	26406	9.08
38	gi|350590321	PREDICTED: keratin, type I cytoskeletal 14-like isoform 1 [Sus scrofa]	90	4	3	19.2	473	51862	5.04
39	gi|350590319	PREDICTED: keratin, type I cytoskeletal 17-like [Sus scrofa]	90	4	3	14.3	448	49530	5
40	gi|311267268	PREDICTED: keratin, type I cytoskeletal 15-like [Sus scrofa]	90	4	3	12.4	460	49501	4.87
41	gi|311267276	PREDICTED: keratin, type I cytoskeletal 19-like [Sus scrofa]	90	4	3	14.1	404	44186	5.05
44	gi|311255413	PREDICTED: keratin, type II cytoskeletal 79 [Sus scrofa]	86	3	2	10.3	535	58094	6.45
48	gi|311267693	PREDICTED: eosinophil peroxidase [Sus scrofa]	82	1	1	10.1	715	81652	10.1
59	gi|311255405	PREDICTED: keratin, type II cytoskeletal 5 [Sus scrofa]	71	1	1	16.3	602	63356	7.59
60	gi|350583965	PREDICTED: keratin, type II cytoskeletal 6A-like [Sus scrofa]	71	1	1	13.1	601	63984	8.66
74	gi|311267326	PREDICTED: keratin, type I cytoskeletal 20-like [Sus scrofa]	64	2	2	8.1	430	49088	5.38
84	gi|194037700	PREDICTED: centrosomal protein of 290 kDa-like [Sus scrofa]	58	3	2	9.1	2481	290691	5.83
98	gi|311261653	PREDICTED: protein KIAA0284-like [Sus scrofa]	52	3	2	3.6	1542	165726	6.52
111	gi|335280417	PREDICTED: centlein [Sus scrofa]	47	3	2	8.6	1404	162550	8.33
126	gi|335280174	PREDICTED: uveal autoantigen with coiled-coil domains and ankyrin repeats protein-like isoform 1 [Sus scrofa]	44	3	2	12.4	1403	162798	6.41

## Sheet: invivo_EHEC_100414_psms
Prot ID	Accession	Description	Mascot Score	# PSMs	# Peptides	Pep_query	Pep_rank	Pep_isbold	Pep_isunique	Pep_exp_mz	Pep_exp_mr	Pep_exp_z	Pep_calc_mr	Pep_delta	Pep_miss	Pep_score	Pep_homol	Pep_ident	Pep_expect	Pep_res_before	Pep_seq	Pep_res_after
1	gi|261245058	hemoglobin subunit beta [Sus scrofa]	4334	135	9	97416	1	1	1	972.298	971.291	1	971.544	-0.2528	0	50.2	34	35	0.0019	K	EAVLGLWGK	V
1	gi|261245058	hemoglobin subunit beta [Sus scrofa]	4334	135	9	97421	1	1	1	972.321	971.314	1	971.544	-0.2299	0	54.85		35	0.00063	K	EAVLGLWGK	V
1	gi|261245058	hemoglobin subunit beta [Sus scrofa]	4334	135	9	97427	1	1	1	972.378	971.371	1	971.544	-0.1729	0	48.44		35	0.0028	K	EAVLGLWGK	V
1	gi|261245058	hemoglobin subunit beta [Sus scrofa]	4334	135	9	97430	1	1	1	972.393	971.385	1	971.544	-0.1586	0	53.16	35	35	0.00094	K	EAVLGLWGK	V
1	gi|261245058	hemoglobin subunit beta [Sus scrofa]	4334	135	9	97435	1	1	1	486.741	971.468	2	971.544	-0.0764	0	20.25	26	35	1.8	K	EAVLGLWGK	V
1	gi|261245058	hemoglobin subunit beta [Sus scrofa]	4334	135	9	97438	1	1	1	486.748	971.481	2	971.544	-0.0626	0	45.51		35	0.0055	K	EAVLGLWGK	V
1	gi|261245058	hemoglobin subunit beta [Sus scrofa]	4334	135	9	97441	1	1	1	486.782	971.549	2	971.544	0.0046	0	52.99		35	0.00097	K	EAVLGLWGK	V
1	gi|261245058	hemoglobin subunit beta [Sus scrofa]	4334	135	9	97443	1	1	1	486.8	971.585	2	971.544	0.0412	0	59.58		35	0.00021	K	EAVLGLWGK	V
1	gi|261245058	hemoglobin subunit beta [Sus scrofa]	4334	135	9	97469	1	1	1	486.97	971.926	2	971.544	0.382	0	43.22	30	35	0.0077	K	EAVLGLWGK	V
1	gi|261245058	hemoglobin subunit beta [Sus scrofa]	4334	135	9	97475	1	1	1	486.996	971.977	2	971.544	0.4332	0	45.35		34	0.0042	K	EAVLGLWGK	V
1	gi|261245058	hemoglobin subunit beta [Sus scrofa]	4334	135	9	97476	1	1	1	486.996	971.978	2	971.544	0.4338	0	45.47		34	0.0041	K	EAVLGLWGK	V
1	gi|261245058	hemoglobin subunit beta [Sus scrofa]	4334	135	9	97478	1	1	1	486.999	971.983	2	971.544	0.4392	0	41.75	33	34	0.0095	K	EAVLGLWGK	V
1	gi|261245058	hemoglobin subunit beta [Sus scrofa]	4334	135	9	97482	1	1	1	487.022	972.03	2	971.544	0.4864	0	71.31		34	1e-05	K	EAVLGLWGK	V
1	gi|261245058	hemoglobin subunit beta [Sus scrofa]	4334	135	9	97487	1	1	1	487.034	972.053	2	971.544	0.509	0	67.25		34	2.7e-05	K	EAVLGLWGK	V
1	gi|261245058	hemoglobin subunit beta [Sus scrofa]	4334	135	9	97499	1	1	1	487.136	972.257	2	971.544	0.713	0	33.26	27	36	0.096	K	EAVLGLWGK	V
1	gi|261245058	hemoglobin subunit beta [Sus scrofa]	4334	135	9	112811	1	1	1	1093.31	1092.3	1	1092.58	-0.2828	0	50.62	28	35	0.0015	K	VLQSFSDGLK	H
1	gi|261245058	hemoglobin subunit beta [Sus scrofa]	4334	135	9	112816	1	1	1	1093.34	1092.33	1	1092.58	-0.2518	0	50.51	28	35	0.0015	K	VLQSFSDGLK	H
1	gi|261245058	hemoglobin subunit beta [Sus scrofa]	4334	135	9	112822	1	1	1	1093.36	1092.36	1	1092.58	-0.2248	0	52.37	30	35	0.00098	K	VLQSFSDGLK	H
1	gi|261245058	hemoglobin subunit beta [Sus scrofa]	4334	135	9	112823	1	1	1	547.187	1092.36	2	1092.58	-0.2213	0	19.5	24	35	1.9	K	VLQSFSDGLK	H
1	gi|261245058	hemoglobin subunit beta [Sus scrofa]	4334	135	9	112828	1	1	1	1093.38	1092.37	1	1092.58	-0.2118	0	53.91	28	35	0.00069	K	VLQSFSDGLK	H
1	gi|261245058	hemoglobin subunit beta [Sus scrofa]	4334	135	9	112836	1	1	1	1093.4	1092.4	1	1092.58	-0.1838	0	47.88	25	35	0.0028	K	VLQSFSDGLK	H
1	gi|261245058	hemoglobin subunit beta [Sus scrofa]	4334	135	9	112844	1	1	1	1093.44	1092.44	1	1092.58	-0.1448	0	45.87	26	35	0.0044	K	VLQSFSDGLK	H
1	gi|261245058	hemoglobin subunit beta [Sus scrofa]	4334	135	9	112885	1	1	1	547.272	1092.53	2	1092.58	-0.0515	0	13.09	24	35	8.3	K	VLQSFSDGLK	H
1	gi|261245058	hemoglobin subunit beta [Sus scrofa]	4334	135	9	112887	1	1	1	547.279	1092.54	2	1092.58	-0.0389	0	60.34	29	35	0.00016	K	VLQSFSDGLK	H
1	gi|261245058	hemoglobin subunit beta [Sus scrofa]	4334	135	9	112903	1	1	1	547.29	1092.57	2	1092.58	-0.0161	0	53.45	30	35	0.00077	K	VLQSFSDGLK	H
1	gi|261245058	hemoglobin subunit beta [Sus scrofa]	4334	135	9	112907	1	1	1	547.295	1092.58	2	1092.58	-0.0055	0	60.62	32	35	0.00015	K	VLQSFSDGLK	H
1	gi|261245058	hemoglobin subunit beta [Sus scrofa]	4334	135	9	112936	1	1	1	547.331	1092.65	2	1092.58	0.0665	0	23.36	28	35	0.78	K	VLQSFSDGLK	H
1	gi|261245058	hemoglobin subunit beta [Sus scrofa]	4334	135	9	112990	1	1	1	547.513	1093.01	2	1092.58	0.4303	0	50.3	29	33	0.0011	K	VLQSFSDGLK	H
1	gi|261245058	hemoglobin subunit beta [Sus scrofa]	4334	135	9	120602	1	1	1	383.636	1147.89	3	1148.67	-0.7801	0	21.86	22	35	1.1	K	VVAGVANALAHK	Y
1	gi|261245058	hemoglobin subunit beta [Sus scrofa]	4334	135	9	120681	1	1	1	575.255	1148.5	2	1148.67	-0.1707	0	54.31		35	0.0006	K	VVAGVANALAHK	Y
1	gi|261245058	hemoglobin subunit beta [Sus scrofa]	4334	135	9	120692	1	1	1	575.29	1148.56	2	1148.67	-0.1017	0	55.93		35	0.00041	K	VVAGVANALAHK	Y
1	gi|261245058	hemoglobin subunit beta [Sus scrofa]	4334	135	9	120729	1	1	1	575.502	1148.99	2	1148.67	0.3221	0	48.54	28	34	0.0018	K	VVAGVANALAHK	Y
1	gi|261245058	hemoglobin subunit beta [Sus scrofa]	4334	135	9	120731	1	1	1	575.51	1149	2	1148.67	0.3379	0	59.22	26	33	0.00015	K	VVAGVANALAHK	Y
1	gi|261245058	hemoglobin subunit beta [Sus scrofa]	4334	135	9	120733	1	1	1	575.514	1149.01	2	1148.67	0.3477	0	56.17	27	33	0.00029	K	VVAGVANALAHK	Y
1	gi|261245058	hemoglobin subunit beta [Sus scrofa]	4334	135	9	120740	1	1	1	575.531	1149.05	2	1148.67	0.3805	0	61.19		33	8.6e-05	K	VVAGVANALAHK	Y
1	gi|261245058	hemoglobin subunit beta [Sus scrofa]	4334	135	9	120741	1	1	1	575.535	1149.06	2	1148.67	0.3887	0	60.73	28	33	9.4e-05	K	VVAGVANALAHK	Y
1	gi|261245058	hemoglobin subunit beta [Sus scrofa]	4334	135	9	120744	1	1	1	575.546	1149.08	2	1148.67	0.4109	0	58.82	23	33	0.00014	K	VVAGVANALAHK	Y
1	gi|261245058	hemoglobin subunit beta [Sus scrofa]	4334	135	9	120746	1	1	1	575.554	1149.09	2	1148.67	0.4275	0	68.69	28	33	1.5e-05	K	VVAGVANALAHK	Y
1	gi|261245058	hemoglobin subunit beta [Sus scrofa]	4334	135	9	120752	1	1	1	575.568	1149.12	2	1148.67	0.4553	0	61.39	28	33	8.2e-05	K	VVAGVANALAHK	Y
1	gi|261245058	hemoglobin subunit beta [Sus scrofa]	4334	135	9	120755	1	1	1	575.586	1149.16	2	1148.67	0.4905	0	63.71	28	33	5.3e-05	K	VVAGVANALAHK	Y
1	gi|261245058	hemoglobin subunit beta [Sus scrofa]	4334	135	9	120761	1	1	1	384.07	1149.19	3	1148.67	0.5201	0	33.41	22	34	0.061	K	VVAGVANALAHK	Y
1	gi|261245058	hemoglobin subunit beta [Sus scrofa]	4334	135	9	120765	1	1	1	384.077	1149.21	3	1148.67	0.5426	0	40.56	31	34	0.013	K	VVAGVANALAHK	Y
1	gi|261245058	hemoglobin subunit beta [Sus scrofa]	4334	135	9	120768	1	1	1	384.08	1149.22	3	1148.67	0.5528	0	28.23	26	34	0.22	K	VVAGVANALAHK	Y
1	gi|261245058	hemoglobin subunit beta [Sus scrofa]	4334	135	9	120775	1	1	1	575.64	1149.27	2	1148.67	0.5989	0	53.23	27	34	0.00075	K	VVAGVANALAHK	Y
1	gi|261245058	hemoglobin subunit beta [Sus scrofa]	4334	135	9	120779	1	1	1	384.109	1149.31	3	1148.67	0.6398	0	51.8	33	35	0.0011	K	VVAGVANALAHK	Y
1	gi|261245058	hemoglobin subunit beta [Sus scrofa]	4334	135	9	120782	1	1	1	384.115	1149.32	3	1148.67	0.6563	0	15.16	22	35	4.9	K	VVAGVANALAHK	Y
1	gi|261245058	hemoglobin subunit beta [Sus scrofa]	4334	135	9	120785	1	1	1	384.132	1149.38	3	1148.67	0.7085	0	25.69	32	35	0.43	K	VVAGVANALAHK	Y
1	gi|261245058	hemoglobin subunit beta [Sus scrofa]	4334	135	9	120789	1	1	1	384.145	1149.41	3	1148.67	0.7478	0	53.82	29	35	0.00067	K	VVAGVANALAHK	Y
1	gi|261245058	hemoglobin subunit beta [Sus scrofa]	4334	135	9	120790	1	1	1	384.152	1149.43	3	1148.67	0.7667	0	34.78	26	35	0.054	K	VVAGVANALAHK	Y
1	gi|261245058	hemoglobin subunit beta [Sus scrofa]	4334	135	9	120792	1	1	1	384.161	1149.46	3	1148.67	0.7943	0	39.8	33	35	0.017	K	VVAGVANALAHK	Y
1	gi|261245058	hemoglobin subunit beta [Sus scrofa]	4334	135	9	120795	1	1	1	384.169	1149.48	3	1148.67	0.8183	0	56.93		35	0.00033	K	VVAGVANALAHK	Y
1	gi|261245058	hemoglobin subunit beta [Sus scrofa]	4334	135	9	120796	1	1	1	384.175	1149.5	3	1148.67	0.836	0	55.71	32	35	0.00043	K	VVAGVANALAHK	Y
1	gi|261245058	hemoglobin subunit beta [Sus scrofa]	4334	135	9	120798	1	1	1	384.177	1149.51	3	1148.67	0.8426	0	59.1	32	35	0.0002	K	VVAGVANALAHK	Y
1	gi|261245058	hemoglobin subunit beta [Sus scrofa]	4334	135	9	120804	1	1	1	384.183	1149.53	3	1148.67	0.8615	0	55.86	32	35	0.00042	K	VVAGVANALAHK	Y
1	gi|261245058	hemoglobin subunit beta [Sus scrofa]	4334	135	9	120805	1	1	1	384.185	1149.53	3	1148.67	0.8675	0	53.92	32	35	0.00065	K	VVAGVANALAHK	Y
1	gi|261245058	hemoglobin subunit beta [Sus scrofa]	4334	135	9	120810	1	1	1	384.198	1149.57	3	1148.67	0.905	0	43.35		35	0.0075	K	VVAGVANALAHK	Y
1	gi|261245058	hemoglobin subunit beta [Sus scrofa]	4334	135	9	120822	1	1	1	384.219	1149.63	3	1148.67	0.968	0	47.42	31	35	0.0029	K	VVAGVANALAHK	Y
1	gi|261245058	hemoglobin subunit beta [Sus scrofa]	4334	135	9	120838	1	1	1	384.267	1149.78	3	1148.67	1.112	0	40.4	28	35	0.015	K	VVAGVANALAHK	Y
1	gi|261245058	hemoglobin subunit beta [Sus scrofa]	4334	135	9	120844	1	1	1	575.93	1149.84	2	1148.67	1.1781	0	17.81	22	35	2.7	K	VVAGVANALAHK	Y
1	gi|261245058	hemoglobin subunit beta [Sus scrofa]	4334	135	9	120847	1	1	1	384.299	1149.87	3	1148.67	1.2074	0	22.68		35	0.87	K	VVAGVANALAHK	Y
1	gi|261245058	hemoglobin subunit beta [Sus scrofa]	4334	135	9	131692	1	1	1	611.026	1220.04	2	1220.68	-0.6398	1	20.36	24	33	1.1	K	KVLQSFSDGLK	H
1	gi|261245058	hemoglobin subunit beta [Sus scrofa]	4334	135	9	131742	1	1	1	611.211	1220.41	2	1220.68	-0.2682	1	49.43	28	35	0.0018	K	KVLQSFSDGLK	H
1	gi|261245058	hemoglobin subunit beta [Sus scrofa]	4334	135	9	131749	1	1	1	611.233	1220.45	2	1220.68	-0.2248	1	56.14	28	35	0.00039	K	KVLQSFSDGLK	H
1	gi|261245058	hemoglobin subunit beta [Sus scrofa]	4334	135	9	131786	1	1	1	611.365	1220.72	2	1220.68	0.0388	1	54.51	25	35	0.00056	K	KVLQSFSDGLK	H
1	gi|261245058	hemoglobin subunit beta [Sus scrofa]	4334	135	9	131820	1	1	1	611.451	1220.89	2	1220.68	0.2114	1	64.16	34	34	6.1e-05	K	KVLQSFSDGLK	H
1	gi|261245058	hemoglobin subunit beta [Sus scrofa]	4334	135	9	131824	1	1	1	611.467	1220.92	2	1220.68	0.243	1	57.91	26	34	0.00025	K	KVLQSFSDGLK	H
1	gi|261245058	hemoglobin subunit beta [Sus scrofa]	4334	135	9	131837	1	1	1	611.534	1221.05	2	1220.68	0.3766	1	53.43	30	33	0.00054	K	KVLQSFSDGLK	H
1	gi|261245058	hemoglobin subunit beta [Sus scrofa]	4334	135	9	131852	1	1	1	611.599	1221.18	2	1220.68	0.5074	1	52.57	28	33	0.00065	K	KVLQSFSDGLK	H
1	gi|261245058	hemoglobin subunit beta [Sus scrofa]	4334	135	9	131858	1	1	1	611.627	1221.24	2	1220.68	0.5626	1	52.11		34	0.00084	K	KVLQSFSDGLK	H
1	gi|261245058	hemoglobin subunit beta [Sus scrofa]	4334	135	9	131864	1	1	1	611.656	1221.3	2	1220.68	0.6214	1	56.79	33	34	0.00031	K	KVLQSFSDGLK	H
1	gi|261245058	hemoglobin subunit beta [Sus scrofa]	4334	135	9	131877	1	1	1	408.147	1221.42	3	1220.68	0.7427	1	14.64	27	34	5.3	K	KVLQSFSDGLK	H
1	gi|261245058	hemoglobin subunit beta [Sus scrofa]	4334	135	9	131935	1	1	1	611.958	1221.9	2	1220.68	1.2242	1	54.61	33	34	0.00053	K	KVLQSFSDGLK	H
1	gi|261245058	hemoglobin subunit beta [Sus scrofa]	4334	135	9	135786	1	1	1	415.381	1243.12	3	1242.67	0.4488	1	18.15	26	33	1.6	K	HLDNLKGTFAK	L
1	gi|261245058	hemoglobin subunit beta [Sus scrofa]	4334	135	9	135872	1	1	1	415.529	1243.56	3	1242.67	0.8925	1	19.64	15	34	1.6	K	HLDNLKGTFAK	L
1	gi|261245058	hemoglobin subunit beta [Sus scrofa]	4334	135	9	135885	1	1	1	415.577	1243.71	3	1242.67	1.0362	1	13.72	20	34	6.3	K	HLDNLKGTFAK	L
1	gi|261245058	hemoglobin subunit beta [Sus scrofa]	4334	135	9	139000	2	1	1	633.043	1264.07	2	1264.82	-0.751	0	13.73	27	33	5	R	LLGNVIVVVLAR	R
1	gi|261245058	hemoglobin subunit beta [Sus scrofa]	4334	135	9	139078	1	1	1	633.169	1264.32	2	1264.82	-0.499	0	22.19	26	34	0.89	R	LLGNVIVVVLAR	R
1	gi|261245058	hemoglobin subunit beta [Sus scrofa]	4334	135	9	139210	1	1	1	633.682	1265.35	2	1264.82	0.5266	0	22.55	22	34	0.82	R	LLGNVIVVVLAR	R
1	gi|261245058	hemoglobin subunit beta [Sus scrofa]	4334	135	9	140253	1	1	0	637.394	1272.77	2	1273.72	-0.945	0	17.5	23	34	2.7	R	LLVVYPWTQR	F
1	gi|261245058	hemoglobin subunit beta [Sus scrofa]	4334	135	9	140319	1	1	0	637.48	1272.95	2	1273.72	-0.7728	0	24	23	34	0.6	R	LLVVYPWTQR	F
1	gi|261245058	hemoglobin subunit beta [Sus scrofa]	4334	135	9	140365	1	1	0	637.558	1273.1	2	1273.72	-0.6162	0	19.09	32	33	1.4	R	LLVVYPWTQR	F
1	gi|261245058	hemoglobin subunit beta [Sus scrofa]	4334	135	9	140400	1	1	0	637.614	1273.21	2	1273.72	-0.5052	0	17.52	27	33	2.1	R	LLVVYPWTQR	F
1	gi|261245058	hemoglobin subunit beta [Sus scrofa]	4334	135	9	140405	1	1	0	637.618	1273.22	2	1273.72	-0.4964	0	23.51	23	33	0.55	R	LLVVYPWTQR	F
1	gi|261245058	hemoglobin subunit beta [Sus scrofa]	4334	135	9	140406	1	1	0	637.623	1273.23	2	1273.72	-0.487	0	32.3	24	33	0.074	R	LLVVYPWTQR	F
1	gi|261245058	hemoglobin subunit beta [Sus scrofa]	4334	135	9	140425	1	1	0	637.692	1273.37	2	1273.72	-0.3488	0	14.8	16	34	5.2	R	LLVVYPWTQR	F
1	gi|261245058	hemoglobin subunit beta [Sus scrofa]	4334	135	9	140431	1	1	0	637.705	1273.39	2	1273.72	-0.3232	0	19.01	23	34	2	R	LLVVYPWTQR	F
1	gi|261245058	hemoglobin subunit beta [Sus scrofa]	4334	135	9	140433	1	1	0	637.707	1273.4	2	1273.72	-0.3184	0	34.08	28	34	0.061	R	LLVVYPWTQR	F
1	gi|261245058	hemoglobin subunit beta [Sus scrofa]	4334	135	9	140437	1	1	0	1274.45	1273.44	1	1273.72	-0.2796	0	16.2	14	34	3.8	R	LLVVYPWTQR	F
1	gi|261245058	hemoglobin subunit beta [Sus scrofa]	4334	135	9	140449	1	1	0	1274.51	1273.5	1	1273.72	-0.2166	0	20.14	21	34	1.5	R	LLVVYPWTQR	F
1	gi|261245058	hemoglobin subunit beta [Sus scrofa]	4334	135	9	140451	1	1	0	637.771	1273.53	2	1273.72	-0.191	0	41.82	26	34	0.01	R	LLVVYPWTQR	F
1	gi|261245058	hemoglobin subunit beta [Sus scrofa]	4334	135	9	140453	1	1	0	637.773	1273.53	2	1273.72	-0.1876	0	49.17	26	34	0.0019	R	LLVVYPWTQR	F
1	gi|261245058	hemoglobin subunit beta [Sus scrofa]	4334	135	9	140454	1	1	0	637.782	1273.55	2	1273.72	-0.1686	0	53.31	27	34	0.00073	R	LLVVYPWTQR	F
1	gi|261245058	hemoglobin subunit beta [Sus scrofa]	4334	135	9	140461	1	1	0	637.802	1273.59	2	1273.72	-0.1292	0	52.67	27	34	0.00085	R	LLVVYPWTQR	F
1	gi|261245058	hemoglobin subunit beta [Sus scrofa]	4334	135	9	140467	1	1	0	637.814	1273.61	2	1273.72	-0.105	0	41.26	26	34	0.012	R	LLVVYPWTQR	F
1	gi|261245058	hemoglobin subunit beta [Sus scrofa]	4334	135	9	140470	1	1	0	637.823	1273.63	2	1273.72	-0.086	0	48.98	26	34	0.002	R	LLVVYPWTQR	F
1	gi|261245058	hemoglobin subunit beta [Sus scrofa]	4334	135	9	140483	1	1	0	637.851	1273.69	2	1273.72	-0.0302	0	47.95	28	34	0.0025	R	LLVVYPWTQR	F
1	gi|261245058	hemoglobin subunit beta [Sus scrofa]	4334	135	9	140506	1	1	0	637.97	1273.93	2	1273.72	0.2078	0	43.6	26	34	0.0068	R	LLVVYPWTQR	F
1	gi|261245058	hemoglobin subunit beta [Sus scrofa]	4334	135	9	140518	1	1	0	638.018	1274.02	2	1273.72	0.3036	0	40.25	26	34	0.013	R	LLVVYPWTQR	F
1	gi|261245058	hemoglobin subunit beta [Sus scrofa]	4334	135	9	140519	1	1	0	638.04	1274.06	2	1273.72	0.3464	0	46.8	26	34	0.0026	R	LLVVYPWTQR	F
1	gi|261245058	hemoglobin subunit beta [Sus scrofa]	4334	135	9	140532	1	1	0	638.067	1274.12	2	1273.72	0.4008	0	40.64	25	33	0.0096	R	LLVVYPWTQR	F
1	gi|261245058	hemoglobin subunit beta [Sus scrofa]	4334	135	9	140534	1	1	0	638.071	1274.13	2	1273.72	0.4086	0	29.68	17	33	0.12	R	LLVVYPWTQR	F
1	gi|261245058	hemoglobin subunit beta [Sus scrofa]	4334	135	9	140535	1	1	0	638.071	1274.13	2	1273.72	0.4092	0	40.43	25	33	0.01	R	LLVVYPWTQR	F
1	gi|261245058	hemoglobin subunit beta [Sus scrofa]	4334	135	9	140537	1	1	0	638.078	1274.14	2	1273.72	0.4224	0	40.4	26	33	0.0099	R	LLVVYPWTQR	F
1	gi|261245058	hemoglobin subunit beta [Sus scrofa]	4334	135	9	140538	1	1	0	638.082	1274.15	2	1273.72	0.4308	0	22.4	23	33	0.62	R	LLVVYPWTQR	F
1	gi|261245058	hemoglobin subunit beta [Sus scrofa]	4334	135	9	140544	1	1	0	638.099	1274.18	2	1273.72	0.4648	0	31.71	19	33	0.074	R	LLVVYPWTQR	F
1	gi|261245058	hemoglobin subunit beta [Sus scrofa]	4334	135	9	140554	1	1	0	638.123	1274.23	2	1273.72	0.513	0	39.62	24	33	0.013	R	LLVVYPWTQR	F
1	gi|261245058	hemoglobin subunit beta [Sus scrofa]	4334	135	9	140565	1	1	0	638.166	1274.32	2	1273.72	0.5988	0	40.44	27	34	0.014	R	LLVVYPWTQR	F
1	gi|261245058	hemoglobin subunit beta [Sus scrofa]	4334	135	9	140566	1	1	0	638.168	1274.32	2	1273.72	0.6042	0	29.45	25	34	0.17	R	LLVVYPWTQR	F
1	gi|261245058	hemoglobin subunit beta [Sus scrofa]	4334	135	9	140576	1	1	0	638.208	1274.4	2	1273.72	0.684	0	40.6	28	34	0.014	R	LLVVYPWTQR	F
1	gi|261245058	hemoglobin subunit beta [Sus scrofa]	4334	135	9	140604	1	1	0	638.378	1274.74	2	1273.72	1.0234	0	43.45	27	34	0.0071	R	LLVVYPWTQR	F
1	gi|261245058	hemoglobin subunit beta [Sus scrofa]	4334	135	9	140628	1	1	0	638.487	1274.96	2	1273.72	1.2416	0	40.34	28	34	0.014	R	LLVVYPWTQR	F
1	gi|261245058	hemoglobin subunit beta [Sus scrofa]	4334	135	9	140643	1	1	0	638.555	1275.1	2	1273.72	1.377	0	38.69	26	33	0.015	R	LLVVYPWTQR	F
1	gi|261245058	hemoglobin subunit beta [Sus scrofa]	4334	135	9	140644	1	1	0	638.555	1275.1	2	1273.72	1.377	0	32.28	26	33	0.067	R	LLVVYPWTQR	F
1	gi|261245058	hemoglobin subunit beta [Sus scrofa]	4334	135	9	146521	1	1	1	657.482	1312.95	2	1313.66	-0.7083	0	40.53	24	34	0.013	K	VNVDEVGGEALGR	L
1	gi|261245058	hemoglobin subunit beta [Sus scrofa]	4334	135	9	146593	1	1	1	657.679	1313.34	2	1313.66	-0.3143	0	84.71	34	34	4.8e-07	K	VNVDEVGGEALGR	L
1	gi|261245058	hemoglobin subunit beta [Sus scrofa]	4334	135	9	146594	1	1	1	1314.35	1313.34	1	1313.66	-0.3138	0	58.95	30	34	0.00018	K	VNVDEVGGEALGR	L
1	gi|261245058	hemoglobin subunit beta [Sus scrofa]	4334	135	9	146596	1	1	1	1314.36	1313.35	1	1313.66	-0.3058	0	56.48	29	34	0.00032	K	VNVDEVGGEALGR	L
1	gi|261245058	hemoglobin subunit beta [Sus scrofa]	4334	135	9	146603	1	1	1	1314.39	1313.38	1	1313.66	-0.2778	0	67.1	32	34	2.9e-05	K	VNVDEVGGEALGR	L
1	gi|261245058	hemoglobin subunit beta [Sus scrofa]	4334	135	9	146608	1	1	1	1314.42	1313.41	1	1313.66	-0.2458	0	69.7	30	34	1.6e-05	K	VNVDEVGGEALGR	L
1	gi|261245058	hemoglobin subunit beta [Sus scrofa]	4334	135	9	146610	1	1	1	1314.43	1313.42	1	1313.66	-0.2368	0	56.32	29	34	0.00035	K	VNVDEVGGEALGR	L
1	gi|261245058	hemoglobin subunit beta [Sus scrofa]	4334	135	9	146615	1	1	1	1314.46	1313.45	1	1313.66	-0.2048	0	54.28	31	34	0.00055	K	VNVDEVGGEALGR	L
1	gi|261245058	hemoglobin subunit beta [Sus scrofa]	4334	135	9	146618	1	1	1	657.75	1313.49	2	1313.66	-0.1723	0	88.24	33	34	2.2e-07	K	VNVDEVGGEALGR	L
1	gi|261245058	hemoglobin subunit beta [Sus scrofa]	4334	135	9	146619	1	1	1	1314.49	1313.49	1	1313.66	-0.1708	0	61.09	31	34	0.00012	K	VNVDEVGGEALGR	L
1	gi|261245058	hemoglobin subunit beta [Sus scrofa]	4334	135	9	146633	1	1	1	657.784	1313.55	2	1313.66	-0.1039	0	78.94	28	34	1.9e-06	K	VNVDEVGGEALGR	L
1	gi|261245058	hemoglobin subunit beta [Sus scrofa]	4334	135	9	146647	1	1	1	657.886	1313.76	2	1313.66	0.1001	0	42.67	22	34	0.008	K	VNVDEVGGEALGR	L
1	gi|261245058	hemoglobin subunit beta [Sus scrofa]	4334	135	9	146651	1	1	1	657.899	1313.78	2	1313.66	0.1251	0	64.95	29	34	4.7e-05	K	VNVDEVGGEALGR	L
1	gi|261245058	hemoglobin subunit beta [Sus scrofa]	4334	135	9	146656	1	1	1	657.92	1313.83	2	1313.66	0.1677	0	70.54	31	34	1.3e-05	K	VNVDEVGGEALGR	L
1	gi|261245058	hemoglobin subunit beta [Sus scrofa]	4334	135	9	146658	1	1	1	657.946	1313.88	2	1313.66	0.2191	0	72.15	31	34	9e-06	K	VNVDEVGGEALGR	L
1	gi|261245058	hemoglobin subunit beta [Sus scrofa]	4334	135	9	146660	1	1	1	657.949	1313.88	2	1313.66	0.2259	0	85.8	31	34	3.9e-07	K	VNVDEVGGEALGR	L
1	gi|261245058	hemoglobin subunit beta [Sus scrofa]	4334	135	9	146666	1	1	1	657.975	1313.93	2	1313.66	0.2775	0	72.09	33	34	9.1e-06	K	VNVDEVGGEALGR	L
1	gi|261245058	hemoglobin subunit beta [Sus scrofa]	4334	135	9	146674	1	1	1	658.001	1313.99	2	1313.66	0.3293	0	38.78	21	34	0.019	K	VNVDEVGGEALGR	L
1	gi|261245058	hemoglobin subunit beta [Sus scrofa]	4334	135	9	146702	1	1	1	658.073	1314.13	2	1313.66	0.4737	0	81.38		33	7.9e-07	K	VNVDEVGGEALGR	L
1	gi|261245058	hemoglobin subunit beta [Sus scrofa]	4334	135	9	146725	1	1	1	658.12	1314.23	2	1313.66	0.5689	0	15.45	19	33	3.1	K	VNVDEVGGEALGR	L
1	gi|261245058	hemoglobin subunit beta [Sus scrofa]	4334	135	9	146782	1	1	1	658.264	1314.51	2	1313.66	0.8567	0	36.63	22	34	0.033	K	VNVDEVGGEALGR	L
1	gi|261245058	hemoglobin subunit beta [Sus scrofa]	4334	135	9	146795	1	1	1	658.316	1314.62	2	1313.66	0.9601	0	15.07	19	34	4.7	K	VNVDEVGGEALGR	L
1	gi|261245058	hemoglobin subunit beta [Sus scrofa]	4334	135	9	168000	1	1	1	484.122	1449.34	3	1448.79	0.5539	1	14.84	20	33	3.9	K	VVAGVANALAHKYH	-
1	gi|261245058	hemoglobin subunit beta [Sus scrofa]	4334	135	9	168006	1	1	1	484.137	1449.39	3	1448.79	0.6004	1	18.61	25	34	1.8	K	VVAGVANALAHKYH	-
1	gi|261245058	hemoglobin subunit beta [Sus scrofa]	4334	135	9	168007	1	1	1	484.147	1449.42	3	1448.79	0.6316	1	17.91	21	34	2.2	K	VVAGVANALAHKYH	-
1	gi|261245058	hemoglobin subunit beta [Sus scrofa]	4334	135	9	168029	1	1	1	484.199	1449.57	3	1448.79	0.7855	1	16.87	23	34	2.8	K	VVAGVANALAHKYH	-
1	gi|261245058	hemoglobin subunit beta [Sus scrofa]	4334	135	9	168055	1	1	1	484.297	1449.87	3	1448.79	1.0807	1	20.91	29	34	1.1	K	VVAGVANALAHKYH	-
1	gi|261245058	hemoglobin subunit beta [Sus scrofa]	4334	135	9	201748	1	1	1	562.529	1684.57	3	1684.83	-0.2661	0	22.03	24	33	0.73	R	LGHDFNPNVQAAFQK	V
1	gi|261245058	hemoglobin subunit beta [Sus scrofa]	4334	135	9	201826	1	1	1	562.64	1684.9	3	1684.83	0.066	0	23.15	24	33	0.57	R	LGHDFNPNVQAAFQK	V
1	gi|261245058	hemoglobin subunit beta [Sus scrofa]	4334	135	9	201912	1	1	1	562.766	1685.28	3	1684.83	0.444	0	14.24	18	32	3.5	R	LGHDFNPNVQAAFQK	V
1	gi|261245058	hemoglobin subunit beta [Sus scrofa]	4334	135	9	201930	1	1	1	562.795	1685.36	3	1684.83	0.5319	0	23.29	18	32	0.4	R	LGHDFNPNVQAAFQK	V
1	gi|261245058	hemoglobin subunit beta [Sus scrofa]	4334	135	9	201944	1	1	1	562.824	1685.45	3	1684.83	0.6168	0	17.05	28	32	1.9	R	LGHDFNPNVQAAFQK	V
1	gi|261245058	hemoglobin subunit beta [Sus scrofa]	4334	135	9	201950	1	1	1	843.749	1685.48	2	1684.83	0.6515	0	24.36	19	33	0.38	R	LGHDFNPNVQAAFQK	V
1	gi|261245058	hemoglobin subunit beta [Sus scrofa]	4334	135	9	202067	1	1	1	843.988	1685.96	2	1684.83	1.1291	0	23.76	19	33	0.49	R	LGHDFNPNVQAAFQK	V
1	gi|261245058	hemoglobin subunit beta [Sus scrofa]	4334	135	9	202068	1	1	1	562.995	1685.96	3	1684.83	1.131	0	16.88	24	33	2.4	R	LGHDFNPNVQAAFQK	V
1	gi|261245058	hemoglobin subunit beta [Sus scrofa]	4334	135	9	202076	1	1	1	844.011	1686.01	2	1684.83	1.1761	0	21.02	16	33	0.92	R	LGHDFNPNVQAAFQK	V
1	gi|261245058	hemoglobin subunit beta [Sus scrofa]	4334	135	9	202080	1	1	1	844.019	1686.02	2	1684.83	1.1921	0	15.43	16	33	3.3	R	LGHDFNPNVQAAFQK	V
1	gi|261245058	hemoglobin subunit beta [Sus scrofa]	4334	135	9	202082	1	1	1	844.022	1686.03	2	1684.83	1.1973	0	23.91	16	33	0.47	R	LGHDFNPNVQAAFQK	V
1	gi|261245058	hemoglobin subunit beta [Sus scrofa]	4334	135	9	202086	1	1	1	844.028	1686.04	2	1684.83	1.2093	0	22.41	20	33	0.66	R	LGHDFNPNVQAAFQK	V
1	gi|261245058	hemoglobin subunit beta [Sus scrofa]	4334	135	9	202100	1	1	1	844.049	1686.08	2	1684.83	1.2509	0	18.33	19	33	1.7	R	LGHDFNPNVQAAFQK	V
1	gi|261245058	hemoglobin subunit beta [Sus scrofa]	4334	135	9	202103	1	1	1	844.055	1686.1	2	1684.83	1.2631	0	18.3	18	33	1.7	R	LGHDFNPNVQAAFQK	V
1	gi|261245058	hemoglobin subunit beta [Sus scrofa]	4334	135	9	202107	1	1	1	844.057	1686.1	2	1684.83	1.2669	0	18.38	17	33	1.7	R	LGHDFNPNVQAAFQK	V
1	gi|261245058	hemoglobin subunit beta [Sus scrofa]	4334	135	9	202116	1	1	1	844.07	1686.12	2	1684.83	1.2929	0	23.63	18	33	0.49	R	LGHDFNPNVQAAFQK	V
1	gi|261245058	hemoglobin subunit beta [Sus scrofa]	4334	135	9	202117	1	1	1	844.07	1686.13	2	1684.83	1.2941	0	20.21	19	33	1.1	R	LGHDFNPNVQAAFQK	V
1	gi|261245058	hemoglobin subunit beta [Sus scrofa]	4334	135	9	202118	1	1	1	844.071	1686.13	2	1684.83	1.2949	0	18.05	17	33	1.8	R	LGHDFNPNVQAAFQK	V
1	gi|261245058	hemoglobin subunit beta [Sus scrofa]	4334	135	9	202125	1	1	1	844.082	1686.15	2	1684.83	1.3179	0	15.32	16	33	3.3	R	LGHDFNPNVQAAFQK	V
1	gi|261245058	hemoglobin subunit beta [Sus scrofa]	4334	135	9	202140	1	1	1	844.112	1686.21	2	1684.83	1.3769	0	19.07	19	33	1.3	R	LGHDFNPNVQAAFQK	V
1	gi|261245058	hemoglobin subunit beta [Sus scrofa]	4334	135	9	222894	1	1	1	615.008	1842	3	1840.93	1.0701	1	14.92	17	33	3.4	R	RLGHDFNPNVQAAFQK	V
1	gi|261245058	hemoglobin subunit beta [Sus scrofa]	4334	135	9	222916	1	1	1	615.038	1842.09	3	1840.93	1.1583	1	19.23	22	33	1.3	R	RLGHDFNPNVQAAFQK	V
1	gi|261245058	hemoglobin subunit beta [Sus scrofa]	4334	135	9	222957	1	1	1	615.086	1842.24	3	1840.93	1.3032	1	21.69	26	33	0.69	R	RLGHDFNPNVQAAFQK	V
1	gi|261245058	hemoglobin subunit beta [Sus scrofa]	4334	135	9	226242	1	1	1	622.838	1865.49	3	1865	0.4872	1	47.25	19	32	0.0016	M	VHLSAEEKEAVLGLWGK	V
1	gi|261245058	hemoglobin subunit beta [Sus scrofa]	4334	135	9	246154	1	1	1	1023.48	2044.95	2	2044.92	0.0274	0	70.05	23	32	9.1e-06	R	FFESFGDLSNADAVMGNPK	V
1	gi|261245058	hemoglobin subunit beta [Sus scrofa]	4334	135	9	246156	1	1	1	1023.5	2044.98	2	2044.92	0.0634	0	98.32	24	32	1.4e-08	R	FFESFGDLSNADAVMGNPK	V
1	gi|261245058	hemoglobin subunit beta [Sus scrofa]	4334	135	9	246177	1	1	1	1023.59	2045.17	2	2044.92	0.2454	0	90.01	29	32	9.2e-08	R	FFESFGDLSNADAVMGNPK	V
1	gi|261245058	hemoglobin subunit beta [Sus scrofa]	4334	135	9	246182	1	1	1	1023.63	2045.24	2	2044.92	0.3174	0	31.42	15	32	0.066	R	FFESFGDLSNADAVMGNPK	V
1	gi|261245058	hemoglobin subunit beta [Sus scrofa]	4334	135	9	246183	1	1	1	1023.63	2045.24	2	2044.92	0.3194	0	43.45	16	32	0.0041	R	FFESFGDLSNADAVMGNPK	V
1	gi|261245058	hemoglobin subunit beta [Sus scrofa]	4334	135	9	246189	1	1	1	1023.67	2045.33	2	2044.92	0.4074	0	34.93		32	0.028	R	FFESFGDLSNADAVMGNPK	V
1	gi|261245058	hemoglobin subunit beta [Sus scrofa]	4334	135	9	246192	1	1	1	1023.68	2045.36	2	2044.92	0.4354	0	64.88	21	32	2.8e-05	R	FFESFGDLSNADAVMGNPK	V
1	gi|261245058	hemoglobin subunit beta [Sus scrofa]	4334	135	9	246196	1	1	1	1023.71	2045.41	2	2044.92	0.4894	0	97.79	21	32	1.3e-08	R	FFESFGDLSNADAVMGNPK	V
1	gi|261245058	hemoglobin subunit beta [Sus scrofa]	4334	135	9	246201	1	1	1	682.837	2045.49	3	2044.92	0.5691	0	35.29	18	31	0.021	R	FFESFGDLSNADAVMGNPK	V
1	gi|261245058	hemoglobin subunit beta [Sus scrofa]	4334	135	9	246231	1	1	1	1024.01	2046.01	2	2044.92	1.0894	0	102.96	23	32	4.9e-09	R	FFESFGDLSNADAVMGNPK	V
1	gi|261245058	hemoglobin subunit beta [Sus scrofa]	4334	135	9	246237	1	1	1	1024.03	2046.04	2	2044.92	1.1154	0	91.89	22	32	6.2e-08	R	FFESFGDLSNADAVMGNPK	V
1	gi|261245058	hemoglobin subunit beta [Sus scrofa]	4334	135	9	246257	1	1	1	1024.08	2046.14	2	2044.92	1.2214	0	105.4	22	32	2.8e-09	R	FFESFGDLSNADAVMGNPK	V
1	gi|261245058	hemoglobin subunit beta [Sus scrofa]	4334	135	9	246268	1	1	1	1024.1	2046.19	2	2044.92	1.2674	0	71.37	17	32	7e-06	R	FFESFGDLSNADAVMGNPK	V
1	gi|261245058	hemoglobin subunit beta [Sus scrofa]	4334	135	9	246273	1	1	1	1024.11	2046.21	2	2044.92	1.2874	0	92.3	24	32	5.6e-08	R	FFESFGDLSNADAVMGNPK	V
1	gi|261245058	hemoglobin subunit beta [Sus scrofa]	4334	135	9	247832	1	1	1	1031.3	2060.58	2	2060.91	-0.3335	0	33.41		32	0.036	R	FFESFGDLSNADAVMGNPK	V
1	gi|261245058	hemoglobin subunit beta [Sus scrofa]	4334	135	9	247861	1	1	1	1031.48	2060.95	2	2060.91	0.0325	0	107.54		33	1.8e-09	R	FFESFGDLSNADAVMGNPK	V
1	gi|261245058	hemoglobin subunit beta [Sus scrofa]	4334	135	9	247868	1	1	1	1031.53	2061.04	2	2060.91	0.1285	0	85	31	33	3.2e-07	R	FFESFGDLSNADAVMGNPK	V
1	gi|261245058	hemoglobin subunit beta [Sus scrofa]	4334	135	9	247903	1	1	1	1031.64	2061.27	2	2060.91	0.3565	0	92.52	25	32	5.5e-08	R	FFESFGDLSNADAVMGNPK	V
1	gi|261245058	hemoglobin subunit beta [Sus scrofa]	4334	135	9	247911	1	1	1	1031.68	2061.34	2	2060.91	0.4265	0	108.34	25	32	1.4e-09	R	FFESFGDLSNADAVMGNPK	V
1	gi|261245058	hemoglobin subunit beta [Sus scrofa]	4334	135	9	247923	1	1	1	688.17	2061.49	3	2060.91	0.5732	0	73.54		31	3.3e-06	R	FFESFGDLSNADAVMGNPK	V
1	gi|261245058	hemoglobin subunit beta [Sus scrofa]	4334	135	9	247931	1	1	1	1031.79	2061.57	2	2060.91	0.6545	0	140.91		31	6.1e-13	R	FFESFGDLSNADAVMGNPK	V
1	gi|261245058	hemoglobin subunit beta [Sus scrofa]	4334	135	9	247957	1	1	1	1031.97	2061.92	2	2060.91	1.0085	0	107.52		32	1.8e-09	R	FFESFGDLSNADAVMGNPK	V
1	gi|261245058	hemoglobin subunit beta [Sus scrofa]	4334	135	9	247960	1	1	1	1031.98	2061.94	2	2060.91	1.0265	0	98.58	22	32	1.4e-08	R	FFESFGDLSNADAVMGNPK	V
1	gi|261245058	hemoglobin subunit beta [Sus scrofa]	4334	135	9	247964	1	1	1	688.338	2061.99	3	2060.91	1.0772	0	76.9	28	32	2e-06	R	FFESFGDLSNADAVMGNPK	V
1	gi|261245058	hemoglobin subunit beta [Sus scrofa]	4334	135	9	247967	1	1	1	1032.02	2062.02	2	2060.91	1.1005	0	110.47		32	8.9e-10	R	FFESFGDLSNADAVMGNPK	V
1	gi|261245058	hemoglobin subunit beta [Sus scrofa]	4334	135	9	252699	1	1	1	703.472	2107.4	3	2107.97	-0.5792	0	16.76	29	32	1.9	K	LSELHCDQLHVDPENFR	L
1	gi|261245058	hemoglobin subunit beta [Sus scrofa]	4334	135	9	252742	1	1	1	1055.04	2108.07	2	2107.97	0.0909	0	86.77		32	2e-07	K	LSELHCDQLHVDPENFR	L
1	gi|261245058	hemoglobin subunit beta [Sus scrofa]	4334	135	9	252744	1	1	1	1055.05	2108.08	2	2107.97	0.1049	0	91.66		32	6.6e-08	K	LSELHCDQLHVDPENFR	L
1	gi|261245058	hemoglobin subunit beta [Sus scrofa]	4334	135	9	252755	1	1	1	1055.1	2108.19	2	2107.97	0.2149	0	73.66	31	32	4.1e-06	K	LSELHCDQLHVDPENFR	L
1	gi|261245058	hemoglobin subunit beta [Sus scrofa]	4334	135	9	252761	2	1	1	703.758	2108.25	3	2107.97	0.2776	0	49.34	27	32	0.0011	K	LSELHCDQLHVDPENFR	L
1	gi|261245058	hemoglobin subunit beta [Sus scrofa]	4334	135	9	252767	2	1	1	703.777	2108.31	3	2107.97	0.334	0	34.49	17	32	0.034	K	LSELHCDQLHVDPENFR	L
1	gi|261245058	hemoglobin subunit beta [Sus scrofa]	4334	135	9	252775	1	1	1	703.82	2108.44	3	2107.97	0.4648	0	49.48	24	32	0.00092	K	LSELHCDQLHVDPENFR	L
1	gi|261245058	hemoglobin subunit beta [Sus scrofa]	4334	135	9	252798	2	1	1	703.933	2108.78	3	2107.97	0.8026	0	37.81	20	32	0.016	K	LSELHCDQLHVDPENFR	L
1	gi|261245058	hemoglobin subunit beta [Sus scrofa]	4334	135	9	252820	2	1	1	703.986	2108.94	3	2107.97	0.961	0	48.89	23	32	0.0012	K	LSELHCDQLHVDPENFR	L
1	gi|261245058	hemoglobin subunit beta [Sus scrofa]	4334	135	9	252826	1	1	1	704.009	2109	3	2107.97	1.0291	0	40.76	21	32	0.0081	K	LSELHCDQLHVDPENFR	L
1	gi|261245058	hemoglobin subunit beta [Sus scrofa]	4334	135	9	252833	1	1	1	704.026	2109.06	3	2107.97	1.0816	0	33.94		32	0.039	K	LSELHCDQLHVDPENFR	L
1	gi|261245058	hemoglobin subunit beta [Sus scrofa]	4334	135	9	252836	1	1	1	704.032	2109.07	3	2107.97	1.0987	0	53.12	24	32	0.00047	K	LSELHCDQLHVDPENFR	L
1	gi|261245058	hemoglobin subunit beta [Sus scrofa]	4334	135	9	252853	2	1	1	704.072	2109.19	3	2107.97	1.2187	0	31.11		32	0.074	K	LSELHCDQLHVDPENFR	L
1	gi|261245058	hemoglobin subunit beta [Sus scrofa]	4334	135	9	252861	1	1	1	704.085	2109.23	3	2107.97	1.2589	0	45.76	19	32	0.0025	K	LSELHCDQLHVDPENFR	L
1	gi|261245058	hemoglobin subunit beta [Sus scrofa]	4334	135	9	252871	1	1	1	704.105	2109.29	3	2107.97	1.3183	0	31.78	18	32	0.062	K	LSELHCDQLHVDPENFR	L
1	gi|261245058	hemoglobin subunit beta [Sus scrofa]	4334	135	9	252872	1	1	1	704.106	2109.3	3	2107.97	1.3219	0	36.84	21	32	0.019	K	LSELHCDQLHVDPENFR	L
1	gi|261245058	hemoglobin subunit beta [Sus scrofa]	4334	135	9	252877	1	1	1	704.119	2109.33	3	2107.97	1.36	0	29.41	17	32	0.1	K	LSELHCDQLHVDPENFR	L
2	gi|242253868	trypsinogen precursor [Sus scrofa]	2318	51	4	84329	1	1	1	421.365	840.715	2	841.502	-0.7871	0	54.8		34	0.00051	R	VATVSLPR	S
2	gi|242253868	trypsinogen precursor [Sus scrofa]	2318	51	4	84343	1	1	1	421.488	840.96	2	841.502	-0.5417	0	24.96	32	33	0.35	R	VATVSLPR	S
2	gi|242253868	trypsinogen precursor [Sus scrofa]	2318	51	4	84353	1	1	1	843.386	842.379	1	841.502	0.8771	0	32.5	24	36	0.11	R	VATVSLPR	S
2	gi|242253868	trypsinogen precursor [Sus scrofa]	2318	51	4	84354	1	1	1	843.395	842.388	1	841.502	0.8857	0	37.95	27	36	0.032	R	VATVSLPR	S
2	gi|242253868	trypsinogen precursor [Sus scrofa]	2318	51	4	84355	1	1	1	843.398	842.391	1	841.502	0.8887	0	32.5	26	36	0.11	R	VATVSLPR	S
2	gi|242253868	trypsinogen precursor [Sus scrofa]	2318	51	4	84356	1	1	1	843.399	842.392	1	841.502	0.8896	0	34.12	24	36	0.078	R	VATVSLPR	S
2	gi|242253868	trypsinogen precursor [Sus scrofa]	2318	51	4	84357	1	1	1	843.402	842.394	1	841.502	0.8921	0	27.54	26	36	0.36	R	VATVSLPR	S
2	gi|242253868	trypsinogen precursor [Sus scrofa]	2318	51	4	84358	1	1	1	843.404	842.397	1	841.502	0.8949	0	28.97	25	36	0.26	R	VATVSLPR	S
2	gi|242253868	trypsinogen precursor [Sus scrofa]	2318	51	4	84361	1	1	1	843.42	842.413	1	841.502	0.9105	0	29.64	25	36	0.22	R	VATVSLPR	S
2	gi|242253868	trypsinogen precursor [Sus scrofa]	2318	51	4	84362	1	1	1	843.422	842.415	1	841.502	0.9126	0	35.65	27	36	0.055	R	VATVSLPR	S
2	gi|242253868	trypsinogen precursor [Sus scrofa]	2318	51	4	84364	1	1	1	843.457	842.45	1	841.502	0.9479	0	28.55	23	36	0.28	R	VATVSLPR	S
2	gi|242253868	trypsinogen precursor [Sus scrofa]	2318	51	4	106704	1	1	1	1045.28	1044.27	1	1044.56	-0.2856	0	30.96	27	35	0.15	K	LSSPATLNSR	V
2	gi|242253868	trypsinogen precursor [Sus scrofa]	2318	51	4	106716	1	1	1	523.167	1044.32	2	1044.56	-0.2367	0	48.44		35	0.0026	K	LSSPATLNSR	V
2	gi|242253868	trypsinogen precursor [Sus scrofa]	2318	51	4	106724	1	1	1	1045.35	1044.35	1	1044.56	-0.2096	0	36.57	28	35	0.04	K	LSSPATLNSR	V
2	gi|242253868	trypsinogen precursor [Sus scrofa]	2318	51	4	106739	1	1	1	523.208	1044.4	2	1044.56	-0.1557	0	49.49		35	0.002	K	LSSPATLNSR	V
2	gi|242253868	trypsinogen precursor [Sus scrofa]	2318	51	4	106745	1	1	1	1045.42	1044.41	1	1044.56	-0.1476	0	34.77	28	35	0.06	K	LSSPATLNSR	V
2	gi|242253868	trypsinogen precursor [Sus scrofa]	2318	51	4	106754	1	1	1	523.23	1044.44	2	1044.56	-0.1115	0	52.71		35	0.00097	K	LSSPATLNSR	V
2	gi|242253868	trypsinogen precursor [Sus scrofa]	2318	51	4	106815	1	1	1	523.419	1044.82	2	1044.56	0.2675	0	47.34	32	35	0.0033	K	LSSPATLNSR	V
2	gi|242253868	trypsinogen precursor [Sus scrofa]	2318	51	4	106820	1	1	1	523.436	1044.86	2	1044.56	0.3011	0	47.46	34	35	0.0032	K	LSSPATLNSR	V
2	gi|242253868	trypsinogen precursor [Sus scrofa]	2318	51	4	106827	1	1	1	523.453	1044.89	2	1044.56	0.3349	0	50.71		35	0.0015	K	LSSPATLNSR	V
2	gi|242253868	trypsinogen precursor [Sus scrofa]	2318	51	4	106832	1	1	1	523.469	1044.92	2	1044.56	0.3663	0	55.33		35	0.00048	K	LSSPATLNSR	V
2	gi|242253868	trypsinogen precursor [Sus scrofa]	2318	51	4	106844	1	1	1	523.498	1044.98	2	1044.56	0.4255	0	52.62		34	0.00075	K	LSSPATLNSR	V
2	gi|242253868	trypsinogen precursor [Sus scrofa]	2318	51	4	261340	1	1	1	737.342	2209	3	2210.1	-1.0926	0	31.39	17	32	0.06	R	LGEHNIDVLEGNEQFINAAK	I
2	gi|242253868	trypsinogen precursor [Sus scrofa]	2318	51	4	261428	1	1	1	737.602	2209.78	3	2210.1	-0.3123	0	74.94	28	32	2.7e-06	R	LGEHNIDVLEGNEQFINAAK	I
2	gi|242253868	trypsinogen precursor [Sus scrofa]	2318	51	4	261444	1	1	1	737.664	2209.97	3	2210.1	-0.126	0	86	28	32	2.2e-07	R	LGEHNIDVLEGNEQFINAAK	I
2	gi|242253868	trypsinogen precursor [Sus scrofa]	2318	51	4	261452	1	1	1	737.718	2210.13	3	2210.1	0.0363	0	49.03	24	32	0.0011	R	LGEHNIDVLEGNEQFINAAK	I
2	gi|242253868	trypsinogen precursor [Sus scrofa]	2318	51	4	261457	1	1	1	737.724	2210.15	3	2210.1	0.0528	0	19.02	20	32	1.1	R	LGEHNIDVLEGNEQFINAAK	I
2	gi|242253868	trypsinogen precursor [Sus scrofa]	2318	51	4	261459	1	1	1	737.729	2210.16	3	2210.1	0.0681	0	76.39	28	32	2e-06	R	LGEHNIDVLEGNEQFINAAK	I
2	gi|242253868	trypsinogen precursor [Sus scrofa]	2318	51	4	261464	1	1	1	1106.11	2210.2	2	2210.1	0.1027	0	83.7	24	32	3.8e-07	R	LGEHNIDVLEGNEQFINAAK	I
2	gi|242253868	trypsinogen precursor [Sus scrofa]	2318	51	4	261467	1	1	1	1106.12	2210.23	2	2210.1	0.1307	0	106.91	24	32	1.8e-09	R	LGEHNIDVLEGNEQFINAAK	I
2	gi|242253868	trypsinogen precursor [Sus scrofa]	2318	51	4	261470	1	1	1	1106.13	2210.25	2	2210.1	0.1567	0	92.84	28	32	4.6e-08	R	LGEHNIDVLEGNEQFINAAK	I
2	gi|242253868	trypsinogen precursor [Sus scrofa]	2318	51	4	261471	1	1	1	1106.14	2210.26	2	2210.1	0.1647	0	105.16	30	32	2.7e-09	R	LGEHNIDVLEGNEQFINAAK	I
2	gi|242253868	trypsinogen precursor [Sus scrofa]	2318	51	4	261473	1	1	1	737.774	2210.3	3	2210.1	0.2046	0	73.07	28	32	4.3e-06	R	LGEHNIDVLEGNEQFINAAK	I
2	gi|242253868	trypsinogen precursor [Sus scrofa]	2318	51	4	261475	1	1	1	1106.16	2210.31	2	2210.1	0.2127	0	89.21	25	32	1e-07	R	LGEHNIDVLEGNEQFINAAK	I
2	gi|242253868	trypsinogen precursor [Sus scrofa]	2318	51	4	261478	1	1	1	1106.18	2210.35	2	2210.1	0.2567	0	106.48	24	32	1.9e-09	R	LGEHNIDVLEGNEQFINAAK	I
2	gi|242253868	trypsinogen precursor [Sus scrofa]	2318	51	4	261479	1	1	1	1106.18	2210.36	2	2210.1	0.2587	0	105.21	26	32	2.6e-09	R	LGEHNIDVLEGNEQFINAAK	I
2	gi|242253868	trypsinogen precursor [Sus scrofa]	2318	51	4	261481	1	1	1	737.802	2210.38	3	2210.1	0.2871	0	76.2	28	32	2e-06	R	LGEHNIDVLEGNEQFINAAK	I
2	gi|242253868	trypsinogen precursor [Sus scrofa]	2318	51	4	261483	1	1	1	1106.2	2210.39	2	2210.1	0.2947	0	106.58	29	32	1.9e-09	R	LGEHNIDVLEGNEQFINAAK	I
2	gi|242253868	trypsinogen precursor [Sus scrofa]	2318	51	4	261489	1	1	1	737.842	2210.5	3	2210.1	0.4065	0	79.52	28	31	8.1e-07	R	LGEHNIDVLEGNEQFINAAK	I
2	gi|242253868	trypsinogen precursor [Sus scrofa]	2318	51	4	261492	1	1	1	1106.29	2210.57	2	2210.1	0.4727	0	74.47	28	31	2.4e-06	R	LGEHNIDVLEGNEQFINAAK	I
2	gi|242253868	trypsinogen precursor [Sus scrofa]	2318	51	4	261496	1	1	1	737.898	2210.67	3	2210.1	0.5739	0	58.57	22	31	9.9e-05	R	LGEHNIDVLEGNEQFINAAK	I
2	gi|242253868	trypsinogen precursor [Sus scrofa]	2318	51	4	261502	1	1	1	737.928	2210.76	3	2210.1	0.6666	0	63.27	23	32	3.9e-05	R	LGEHNIDVLEGNEQFINAAK	I
2	gi|242253868	trypsinogen precursor [Sus scrofa]	2318	51	4	261511	1	1	1	737.958	2210.85	3	2210.1	0.7566	0	76.41	31	32	2e-06	R	LGEHNIDVLEGNEQFINAAK	I
2	gi|242253868	trypsinogen precursor [Sus scrofa]	2318	51	4	261512	1	1	1	737.96	2210.86	3	2210.1	0.7602	0	63.43	28	32	3.9e-05	R	LGEHNIDVLEGNEQFINAAK	I
2	gi|242253868	trypsinogen precursor [Sus scrofa]	2318	51	4	261515	1	1	1	738.006	2211	3	2210.1	0.8994	0	25.16	19	32	0.27	R	LGEHNIDVLEGNEQFINAAK	I
2	gi|242253868	trypsinogen precursor [Sus scrofa]	2318	51	4	261517	1	1	1	738.012	2211.01	3	2210.1	0.9177	0	68.06	22	32	1.4e-05	R	LGEHNIDVLEGNEQFINAAK	I
2	gi|242253868	trypsinogen precursor [Sus scrofa]	2318	51	4	261521	1	1	1	738.017	2211.03	3	2210.1	0.9318	0	66.7	22	32	1.9e-05	R	LGEHNIDVLEGNEQFINAAK	I
2	gi|242253868	trypsinogen precursor [Sus scrofa]	2318	51	4	261526	1	1	1	738.038	2211.09	3	2210.1	0.9954	0	54.23	24	32	0.00033	R	LGEHNIDVLEGNEQFINAAK	I
2	gi|242253868	trypsinogen precursor [Sus scrofa]	2318	51	4	261530	1	1	1	1106.57	2211.12	2	2210.1	1.0247	0	90.42	24	32	8e-08	R	LGEHNIDVLEGNEQFINAAK	I
2	gi|242253868	trypsinogen precursor [Sus scrofa]	2318	51	4	261532	1	1	1	738.058	2211.15	3	2210.1	1.0569	0	58.16	23	32	0.00013	R	LGEHNIDVLEGNEQFINAAK	I
2	gi|242253868	trypsinogen precursor [Sus scrofa]	2318	51	4	261533	1	1	1	738.06	2211.16	3	2210.1	1.062	0	77.59	25	32	1.5e-06	R	LGEHNIDVLEGNEQFINAAK	I
2	gi|242253868	trypsinogen precursor [Sus scrofa]	2318	51	4	261536	1	1	1	738.069	2211.19	3	2210.1	1.0893	0	71.6	25	32	6.1e-06	R	LGEHNIDVLEGNEQFINAAK	I
2	gi|242253868	trypsinogen precursor [Sus scrofa]	2318	51	4	261539	1	1	1	738.076	2211.21	3	2210.1	1.1091	0	48.78	24	32	0.0012	R	LGEHNIDVLEGNEQFINAAK	I
2	gi|242253868	trypsinogen precursor [Sus scrofa]	2318	51	4	261541	1	1	1	1106.61	2211.21	2	2210.1	1.1147	0	90.56	25	32	7.7e-08	R	LGEHNIDVLEGNEQFINAAK	I
2	gi|242253868	trypsinogen precursor [Sus scrofa]	2318	51	4	261543	1	1	1	1106.62	2211.22	2	2210.1	1.1187	0	103.26	26	32	4.1e-09	R	LGEHNIDVLEGNEQFINAAK	I
2	gi|242253868	trypsinogen precursor [Sus scrofa]	2318	51	4	261544	1	1	1	738.085	2211.23	3	2210.1	1.1361	0	64.39	21	32	3.2e-05	R	LGEHNIDVLEGNEQFINAAK	I
2	gi|242253868	trypsinogen precursor [Sus scrofa]	2318	51	4	261548	1	1	1	1106.64	2211.27	2	2210.1	1.1707	0	89.15	23	32	1.1e-07	R	LGEHNIDVLEGNEQFINAAK	I
2	gi|242253868	trypsinogen precursor [Sus scrofa]	2318	51	4	261549	1	1	1	1106.65	2211.28	2	2210.1	1.1807	0	94.18	25	32	3.3e-08	R	LGEHNIDVLEGNEQFINAAK	I
2	gi|242253868	trypsinogen precursor [Sus scrofa]	2318	51	4	261560	1	1	1	738.127	2211.36	3	2210.1	1.2633	0	60.13	21	32	8.4e-05	R	LGEHNIDVLEGNEQFINAAK	I
2	gi|242253868	trypsinogen precursor [Sus scrofa]	2318	51	4	261567	1	1	1	738.167	2211.48	3	2210.1	1.3836	0	78.69	27	31	1e-06	R	LGEHNIDVLEGNEQFINAAK	I
2	gi|242253868	trypsinogen precursor [Sus scrofa]	2318	51	4	261568	1	1	1	738.172	2211.49	3	2210.1	1.3971	0	63.41	23	31	3.4e-05	R	LGEHNIDVLEGNEQFINAAK	I
2	gi|242253868	trypsinogen precursor [Sus scrofa]	2318	51	4	268119	1	1	1	767.198	2298.57	3	2298.17	0.4056	0	29.96	21	31	0.066	K	IITHPNFNGNTLDNDIMLIK	L
2	gi|242253868	trypsinogen precursor [Sus scrofa]	2318	51	4	268136	1	1	1	767.314	2298.92	3	2298.17	0.7512	0	37.65	27	32	0.015	K	IITHPNFNGNTLDNDIMLIK	L
2	gi|242253868	trypsinogen precursor [Sus scrofa]	2318	51	4	268146	1	1	1	767.387	2299.14	3	2298.17	0.9723	0	34.1	25	32	0.034	K	IITHPNFNGNTLDNDIMLIK	L
2	gi|242253868	trypsinogen precursor [Sus scrofa]	2318	51	4	268152	1	1	1	1150.63	2299.25	2	2298.17	1.0776	0	66.77	18	32	1.8e-05	K	IITHPNFNGNTLDNDIMLIK	L
2	gi|242253868	trypsinogen precursor [Sus scrofa]	2318	51	4	268160	1	1	1	1150.7	2299.4	2	2298.17	1.2276	0	68.97	18	32	1.1e-05	K	IITHPNFNGNTLDNDIMLIK	L
3	gi|350581842	PREDICTED: hemoglobin subunit alpha-like isoform 1 [Sus scrofa]	1828	56	5	106007	1	1	1	521.14	1040.27	2	1040.54	-0.2701	0	15.22	21	35	4.9	R	MFLGFPTTK	T
3	gi|350581842	PREDICTED: hemoglobin subunit alpha-like isoform 1 [Sus scrofa]	1828	56	5	106045	1	1	1	521.217	1040.42	2	1040.54	-0.1163	0	20.14	22	35	1.6	R	MFLGFPTTK	T
3	gi|350581842	PREDICTED: hemoglobin subunit alpha-like isoform 1 [Sus scrofa]	1828	56	5	106075	2	1	1	521.249	1040.48	2	1040.54	-0.0537	0	13.7	27	35	6.9	R	MFLGFPTTK	T
3	gi|350581842	PREDICTED: hemoglobin subunit alpha-like isoform 1 [Sus scrofa]	1828	56	5	106100	1	1	1	521.269	1040.52	2	1040.54	-0.0121	0	17.48	24	35	2.9	R	MFLGFPTTK	T
3	gi|350581842	PREDICTED: hemoglobin subunit alpha-like isoform 1 [Sus scrofa]	1828	56	5	106121	1	1	1	521.291	1040.57	2	1040.54	0.0315	0	38.31	24	35	0.024	R	MFLGFPTTK	T
3	gi|350581842	PREDICTED: hemoglobin subunit alpha-like isoform 1 [Sus scrofa]	1828	56	5	106155	1	1	1	521.312	1040.61	2	1040.54	0.0725	0	19.51	24	35	1.8	R	MFLGFPTTK	T
3	gi|350581842	PREDICTED: hemoglobin subunit alpha-like isoform 1 [Sus scrofa]	1828	56	5	106157	1	1	1	521.313	1040.61	2	1040.54	0.0747	0	22.2	22	35	0.98	R	MFLGFPTTK	T
3	gi|350581842	PREDICTED: hemoglobin subunit alpha-like isoform 1 [Sus scrofa]	1828	56	5	106161	1	1	1	521.32	1040.63	2	1040.54	0.0893	0	16.49	22	35	3.6	R	MFLGFPTTK	T
3	gi|350581842	PREDICTED: hemoglobin subunit alpha-like isoform 1 [Sus scrofa]	1828	56	5	106165	1	1	1	521.324	1040.63	2	1040.54	0.0967	0	15.49	23	35	4.6	R	MFLGFPTTK	T
3	gi|350581842	PREDICTED: hemoglobin subunit alpha-like isoform 1 [Sus scrofa]	1828	56	5	106175	1	1	1	521.331	1040.65	2	1040.54	0.1107	0	19.39	27	35	1.9	R	MFLGFPTTK	T
3	gi|350581842	PREDICTED: hemoglobin subunit alpha-like isoform 1 [Sus scrofa]	1828	56	5	106199	1	1	1	521.345	1040.67	2	1040.54	0.1379	0	17.23	24	35	3.1	R	MFLGFPTTK	T
3	gi|350581842	PREDICTED: hemoglobin subunit alpha-like isoform 1 [Sus scrofa]	1828	56	5	106211	1	1	1	521.359	1040.7	2	1040.54	0.1667	0	31.37	28	35	0.12	R	MFLGFPTTK	T
3	gi|350581842	PREDICTED: hemoglobin subunit alpha-like isoform 1 [Sus scrofa]	1828	56	5	106215	1	1	1	521.362	1040.71	2	1040.54	0.1737	0	28.93	25	35	0.21	R	MFLGFPTTK	T
3	gi|350581842	PREDICTED: hemoglobin subunit alpha-like isoform 1 [Sus scrofa]	1828	56	5	106237	1	1	1	521.38	1040.75	2	1040.54	0.2093	0	22.29	26	35	0.96	R	MFLGFPTTK	T
3	gi|350581842	PREDICTED: hemoglobin subunit alpha-like isoform 1 [Sus scrofa]	1828	56	5	106239	1	1	1	521.382	1040.75	2	1040.54	0.2129	0	19.53	19	35	1.8	R	MFLGFPTTK	T
3	gi|350581842	PREDICTED: hemoglobin subunit alpha-like isoform 1 [Sus scrofa]	1828	56	5	106243	1	1	1	521.388	1040.76	2	1040.54	0.2251	0	13.93	26	35	6.6	R	MFLGFPTTK	T
3	gi|350581842	PREDICTED: hemoglobin subunit alpha-like isoform 1 [Sus scrofa]	1828	56	5	106246	1	1	1	521.391	1040.77	2	1040.54	0.2301	0	17.31	27	35	3	R	MFLGFPTTK	T
3	gi|350581842	PREDICTED: hemoglobin subunit alpha-like isoform 1 [Sus scrofa]	1828	56	5	106287	1	1	1	521.463	1040.91	2	1040.54	0.3747	0	18.47	28	34	2.1	R	MFLGFPTTK	T
3	gi|350581842	PREDICTED: hemoglobin subunit alpha-like isoform 1 [Sus scrofa]	1828	56	5	106304	1	1	1	521.508	1041	2	1040.54	0.4653	0	35.56	24	33	0.033	R	MFLGFPTTK	T
3	gi|350581842	PREDICTED: hemoglobin subunit alpha-like isoform 1 [Sus scrofa]	1828	56	5	106317	1	1	1	521.552	1041.09	2	1040.54	0.5533	0	15.17	26	33	3.7	R	MFLGFPTTK	T
3	gi|350581842	PREDICTED: hemoglobin subunit alpha-like isoform 1 [Sus scrofa]	1828	56	5	106343	1	1	1	521.713	1041.41	2	1040.54	0.8749	0	16.47	26	35	3.9	R	MFLGFPTTK	T
3	gi|350581842	PREDICTED: hemoglobin subunit alpha-like isoform 1 [Sus scrofa]	1828	56	5	107998	1	1	1	1057.22	1056.21	1	1056.53	-0.3167	0	33.46	20	35	0.077	R	MFLGFPTTK	T
3	gi|350581842	PREDICTED: hemoglobin subunit alpha-like isoform 1 [Sus scrofa]	1828	56	5	108026	1	1	1	529.211	1056.41	2	1056.53	-0.1242	0	44.46	32	35	0.0063	R	MFLGFPTTK	T
3	gi|350581842	PREDICTED: hemoglobin subunit alpha-like isoform 1 [Sus scrofa]	1828	56	5	108103	1	1	1	529.487	1056.96	2	1056.53	0.4288	0	18.26	24	34	2.2	R	MFLGFPTTK	T
3	gi|350581842	PREDICTED: hemoglobin subunit alpha-like isoform 1 [Sus scrofa]	1828	56	5	108105	1	1	1	529.494	1056.97	2	1056.53	0.4422	0	24.46	26	34	0.51	R	MFLGFPTTK	T
3	gi|350581842	PREDICTED: hemoglobin subunit alpha-like isoform 1 [Sus scrofa]	1828	56	5	108149	1	1	1	529.646	1057.28	2	1056.53	0.7468	0	29.66	28	35	0.2	R	MFLGFPTTK	T
3	gi|350581842	PREDICTED: hemoglobin subunit alpha-like isoform 1 [Sus scrofa]	1828	56	5	111792	1	1	0	544.16	1086.31	2	1086.62	-0.3121	1	34.51		35	0.065	K	LRVDPVNFK	L
3	gi|350581842	PREDICTED: hemoglobin subunit alpha-like isoform 1 [Sus scrofa]	1828	56	5	111824	1	1	0	544.298	1086.58	2	1086.62	-0.0381	1	34.53	30	35	0.065	K	LRVDPVNFK	L
3	gi|350581842	PREDICTED: hemoglobin subunit alpha-like isoform 1 [Sus scrofa]	1828	56	5	111921	1	1	0	544.475	1086.93	2	1086.62	0.3159	1	31.51		35	0.12	K	LRVDPVNFK	L
3	gi|350581842	PREDICTED: hemoglobin subunit alpha-like isoform 1 [Sus scrofa]	1828	56	5	111964	1	1	0	544.513	1087.01	2	1086.62	0.3927	1	34.64		34	0.047	K	LRVDPVNFK	L
3	gi|350581842	PREDICTED: hemoglobin subunit alpha-like isoform 1 [Sus scrofa]	1828	56	5	111976	1	1	0	544.525	1087.04	2	1086.62	0.4165	1	35.3	27	34	0.038	K	LRVDPVNFK	L
3	gi|350581842	PREDICTED: hemoglobin subunit alpha-like isoform 1 [Sus scrofa]	1828	56	5	111981	1	1	0	363.355	1087.04	3	1086.62	0.4258	1	29.17		34	0.16	K	LRVDPVNFK	L
3	gi|350581842	PREDICTED: hemoglobin subunit alpha-like isoform 1 [Sus scrofa]	1828	56	5	112051	1	1	0	363.426	1087.26	3	1086.62	0.6376	1	36.81	30	35	0.038	K	LRVDPVNFK	L
3	gi|350581842	PREDICTED: hemoglobin subunit alpha-like isoform 1 [Sus scrofa]	1828	56	5	112052	1	1	0	363.428	1087.26	3	1086.62	0.6424	1	41.35		35	0.013	K	LRVDPVNFK	L
3	gi|350581842	PREDICTED: hemoglobin subunit alpha-like isoform 1 [Sus scrofa]	1828	56	5	112073	1	1	0	363.447	1087.32	3	1086.62	0.7009	1	28.53	27	35	0.26	K	LRVDPVNFK	L
3	gi|350581842	PREDICTED: hemoglobin subunit alpha-like isoform 1 [Sus scrofa]	1828	56	5	112101	1	1	0	363.491	1087.45	3	1086.62	0.8314	1	38.02	35	35	0.029	K	LRVDPVNFK	L
3	gi|350581842	PREDICTED: hemoglobin subunit alpha-like isoform 1 [Sus scrofa]	1828	56	5	112125	1	1	0	363.522	1087.54	3	1086.62	0.9259	1	34.39	28	35	0.067	K	LRVDPVNFK	L
3	gi|350581842	PREDICTED: hemoglobin subunit alpha-like isoform 1 [Sus scrofa]	1828	56	5	112126	1	1	0	363.525	1087.55	3	1086.62	0.9334	1	34.93	34	35	0.059	K	LRVDPVNFK	L
3	gi|350581842	PREDICTED: hemoglobin subunit alpha-like isoform 1 [Sus scrofa]	1828	56	5	112136	1	1	0	363.535	1087.58	3	1086.62	0.9652	1	39.1	30	35	0.023	K	LRVDPVNFK	L
3	gi|350581842	PREDICTED: hemoglobin subunit alpha-like isoform 1 [Sus scrofa]	1828	56	5	112147	1	1	0	363.564	1087.67	3	1086.62	1.0513	1	23.42	35	35	0.83	K	LRVDPVNFK	L
3	gi|350581842	PREDICTED: hemoglobin subunit alpha-like isoform 1 [Sus scrofa]	1828	56	5	112168	1	1	0	363.601	1087.78	3	1086.62	1.1611	1	21.49	25	35	1.3	K	LRVDPVNFK	L
3	gi|350581842	PREDICTED: hemoglobin subunit alpha-like isoform 1 [Sus scrofa]	1828	56	5	112214	1	1	0	545.002	1087.99	2	1086.62	1.3701	1	34.35		34	0.053	K	LRVDPVNFK	L
3	gi|350581842	PREDICTED: hemoglobin subunit alpha-like isoform 1 [Sus scrofa]	1828	56	5	116040	1	1	1	558.425	1114.84	2	1114.63	0.2016	1	26.04	25	35	0.43	M	VLSAADKANVK	A
3	gi|350581842	PREDICTED: hemoglobin subunit alpha-like isoform 1 [Sus scrofa]	1828	56	5	116042	1	1	1	558.428	1114.84	2	1114.63	0.2074	1	34.78	24	35	0.057	M	VLSAADKANVK	A
3	gi|350581842	PREDICTED: hemoglobin subunit alpha-like isoform 1 [Sus scrofa]	1828	56	5	116168	1	1	1	372.891	1115.65	3	1114.63	1.0172	1	16.47	24	35	4	M	VLSAADKANVK	A
3	gi|350581842	PREDICTED: hemoglobin subunit alpha-like isoform 1 [Sus scrofa]	1828	56	5	141105	1	1	1	640.695	1279.38	2	1278.72	0.6569	0	27.67	25	34	0.25	K	FLANVSTVLTSK	Y
3	gi|350581842	PREDICTED: hemoglobin subunit alpha-like isoform 1 [Sus scrofa]	1828	56	5	141219	1	1	1	641.058	1280.1	2	1278.72	1.3821	0	64.02	26	33	4.2e-05	K	FLANVSTVLTSK	Y
3	gi|350581842	PREDICTED: hemoglobin subunit alpha-like isoform 1 [Sus scrofa]	1828	56	5	163617	1	1	1	474.61	1420.81	3	1421.7	-0.8939	0	18.55	16	34	1.9	K	VGGQAGAHGAEALER	M
3	gi|350581842	PREDICTED: hemoglobin subunit alpha-like isoform 1 [Sus scrofa]	1828	56	5	163790	1	1	1	711.789	1421.56	2	1421.7	-0.1375	0	74.45	28	34	4.8e-06	K	VGGQAGAHGAEALER	M
3	gi|350581842	PREDICTED: hemoglobin subunit alpha-like isoform 1 [Sus scrofa]	1828	56	5	163831	1	1	1	711.968	1421.92	2	1421.7	0.2213	0	69.34	28	34	1.5e-05	K	VGGQAGAHGAEALER	M
3	gi|350581842	PREDICTED: hemoglobin subunit alpha-like isoform 1 [Sus scrofa]	1828	56	5	163834	1	1	1	711.975	1421.93	2	1421.7	0.2333	0	53.45	32	34	0.0006	K	VGGQAGAHGAEALER	M
3	gi|350581842	PREDICTED: hemoglobin subunit alpha-like isoform 1 [Sus scrofa]	1828	56	5	163835	1	1	1	711.976	1421.94	2	1421.7	0.2355	0	56.15	28	34	0.00032	K	VGGQAGAHGAEALER	M
3	gi|350581842	PREDICTED: hemoglobin subunit alpha-like isoform 1 [Sus scrofa]	1828	56	5	163837	1	1	1	711.985	1421.96	2	1421.7	0.2541	0	67.76	27	34	2.2e-05	K	VGGQAGAHGAEALER	M
3	gi|350581842	PREDICTED: hemoglobin subunit alpha-like isoform 1 [Sus scrofa]	1828	56	5	163839	1	1	1	711.99	1421.96	2	1421.7	0.2635	0	61.92	26	34	8.5e-05	K	VGGQAGAHGAEALER	M
3	gi|350581842	PREDICTED: hemoglobin subunit alpha-like isoform 1 [Sus scrofa]	1828	56	5	163845	1	1	1	711.998	1421.98	2	1421.7	0.2795	0	75.64	27	34	3.6e-06	K	VGGQAGAHGAEALER	M
3	gi|350581842	PREDICTED: hemoglobin subunit alpha-like isoform 1 [Sus scrofa]	1828	56	5	163863	1	1	1	712.029	1422.04	2	1421.7	0.3433	0	54.02	23	34	0.0005	K	VGGQAGAHGAEALER	M
3	gi|350581842	PREDICTED: hemoglobin subunit alpha-like isoform 1 [Sus scrofa]	1828	56	5	163866	1	1	1	475.025	1422.05	3	1421.7	0.352	0	44.91	23	33	0.0041	K	VGGQAGAHGAEALER	M
3	gi|350581842	PREDICTED: hemoglobin subunit alpha-like isoform 1 [Sus scrofa]	1828	56	5	163873	1	1	1	475.03	1422.07	3	1421.7	0.3667	0	60.83	26	33	0.0001	K	VGGQAGAHGAEALER	M
3	gi|350581842	PREDICTED: hemoglobin subunit alpha-like isoform 1 [Sus scrofa]	1828	56	5	163876	1	1	1	712.044	1422.07	2	1421.7	0.3729	0	67.42	32	33	2.2e-05	K	VGGQAGAHGAEALER	M
3	gi|350581842	PREDICTED: hemoglobin subunit alpha-like isoform 1 [Sus scrofa]	1828	56	5	163877	1	1	1	712.044	1422.07	2	1421.7	0.3733	0	69.28	29	33	1.4e-05	K	VGGQAGAHGAEALER	M
3	gi|350581842	PREDICTED: hemoglobin subunit alpha-like isoform 1 [Sus scrofa]	1828	56	5	163881	1	1	1	712.05	1422.08	2	1421.7	0.3837	0	75.38	28	33	3.5e-06	K	VGGQAGAHGAEALER	M
3	gi|350581842	PREDICTED: hemoglobin subunit alpha-like isoform 1 [Sus scrofa]	1828	56	5	163885	1	1	1	712.061	1422.11	2	1421.7	0.4061	0	76.64	32	33	2.4e-06	K	VGGQAGAHGAEALER	M
3	gi|350581842	PREDICTED: hemoglobin subunit alpha-like isoform 1 [Sus scrofa]	1828	56	5	163887	1	1	1	712.064	1422.11	2	1421.7	0.4117	0	57.19	31	33	0.00021	K	VGGQAGAHGAEALER	M
3	gi|350581842	PREDICTED: hemoglobin subunit alpha-like isoform 1 [Sus scrofa]	1828	56	5	163889	1	1	1	712.072	1422.13	2	1421.7	0.4279	0	66.44	28	33	2.4e-05	K	VGGQAGAHGAEALER	M
3	gi|350581842	PREDICTED: hemoglobin subunit alpha-like isoform 1 [Sus scrofa]	1828	56	5	163892	1	1	1	712.076	1422.14	2	1421.7	0.4361	0	68.57	29	33	1.4e-05	K	VGGQAGAHGAEALER	M
3	gi|350581842	PREDICTED: hemoglobin subunit alpha-like isoform 1 [Sus scrofa]	1828	56	5	163899	1	1	1	475.067	1422.18	3	1421.7	0.4765	0	63.29	31	32	4.5e-05	K	VGGQAGAHGAEALER	M
3	gi|350581842	PREDICTED: hemoglobin subunit alpha-like isoform 1 [Sus scrofa]	1828	56	5	163932	1	1	1	475.118	1422.33	3	1421.7	0.6316	0	30.97	23	33	0.094	K	VGGQAGAHGAEALER	M
3	gi|350581842	PREDICTED: hemoglobin subunit alpha-like isoform 1 [Sus scrofa]	1828	56	5	163941	1	1	1	475.128	1422.36	3	1421.7	0.6598	0	63.46	25	33	5.5e-05	K	VGGQAGAHGAEALER	M
3	gi|350581842	PREDICTED: hemoglobin subunit alpha-like isoform 1 [Sus scrofa]	1828	56	5	163944	1	1	1	475.129	1422.36	3	1421.7	0.6628	0	67.38	29	33	2.3e-05	K	VGGQAGAHGAEALER	M
3	gi|350581842	PREDICTED: hemoglobin subunit alpha-like isoform 1 [Sus scrofa]	1828	56	5	163945	1	1	1	475.13	1422.37	3	1421.7	0.667	0	63.91	27	33	5e-05	K	VGGQAGAHGAEALER	M
3	gi|350581842	PREDICTED: hemoglobin subunit alpha-like isoform 1 [Sus scrofa]	1828	56	5	163955	1	1	1	475.155	1422.44	3	1421.7	0.7408	0	64.33	29	34	4.9e-05	K	VGGQAGAHGAEALER	M
3	gi|350581842	PREDICTED: hemoglobin subunit alpha-like isoform 1 [Sus scrofa]	1828	56	5	163968	1	1	1	475.183	1422.53	3	1421.7	0.8263	0	66.79	27	34	2.8e-05	K	VGGQAGAHGAEALER	M
3	gi|350581842	PREDICTED: hemoglobin subunit alpha-like isoform 1 [Sus scrofa]	1828	56	5	163975	1	1	1	475.194	1422.56	3	1421.7	0.8581	0	63.93	29	34	5.4e-05	K	VGGQAGAHGAEALER	M
3	gi|350581842	PREDICTED: hemoglobin subunit alpha-like isoform 1 [Sus scrofa]	1828	56	5	163978	1	1	1	475.2	1422.58	3	1421.7	0.8755	0	39.68	24	34	0.014	K	VGGQAGAHGAEALER	M
3	gi|350581842	PREDICTED: hemoglobin subunit alpha-like isoform 1 [Sus scrofa]	1828	56	5	164013	1	1	1	475.241	1422.7	3	1421.7	1.0009	0	71.22	27	34	1e-05	K	VGGQAGAHGAEALER	M
3	gi|350581842	PREDICTED: hemoglobin subunit alpha-like isoform 1 [Sus scrofa]	1828	56	5	164070	1	1	1	475.296	1422.87	3	1421.7	1.1662	0	68.77	27	34	1.8e-05	K	VGGQAGAHGAEALER	M
3	gi|350581842	PREDICTED: hemoglobin subunit alpha-like isoform 1 [Sus scrofa]	1828	56	5	164073	1	1	1	475.299	1422.87	3	1421.7	1.1734	0	60.11	26	34	0.00013	K	VGGQAGAHGAEALER	M
3	gi|350581842	PREDICTED: hemoglobin subunit alpha-like isoform 1 [Sus scrofa]	1828	56	5	164076	1	1	1	475.301	1422.88	3	1421.7	1.18	0	74.94	29	34	4.3e-06	K	VGGQAGAHGAEALER	M
3	gi|350581842	PREDICTED: hemoglobin subunit alpha-like isoform 1 [Sus scrofa]	1828	56	5	164077	1	1	1	475.301	1422.88	3	1421.7	1.18	0	55.5	23	34	0.00037	K	VGGQAGAHGAEALER	M
3	gi|350581842	PREDICTED: hemoglobin subunit alpha-like isoform 1 [Sus scrofa]	1828	56	5	164084	1	1	1	475.309	1422.91	3	1421.7	1.2049	0	63.1	27	34	6.5e-05	K	VGGQAGAHGAEALER	M
3	gi|350581842	PREDICTED: hemoglobin subunit alpha-like isoform 1 [Sus scrofa]	1828	56	5	164110	1	1	1	712.499	1422.98	2	1421.7	1.2813	0	53.36	33	34	0.00061	K	VGGQAGAHGAEALER	M
3	gi|350581842	PREDICTED: hemoglobin subunit alpha-like isoform 1 [Sus scrofa]	1828	56	5	164133	1	1	1	712.527	1423.04	2	1421.7	1.3391	0	54.67	26	34	0.00043	K	VGGQAGAHGAEALER	M
3	gi|350581842	PREDICTED: hemoglobin subunit alpha-like isoform 1 [Sus scrofa]	1828	56	5	164135	1	1	1	475.357	1423.05	3	1421.7	1.3474	0	27.45	20	33	0.22	K	VGGQAGAHGAEALER	M
3	gi|350581842	PREDICTED: hemoglobin subunit alpha-like isoform 1 [Sus scrofa]	1828	56	5	164158	1	1	1	712.554	1423.09	2	1421.7	1.3917	0	63.02	26	33	5.8e-05	K	VGGQAGAHGAEALER	M
3	gi|350581842	PREDICTED: hemoglobin subunit alpha-like isoform 1 [Sus scrofa]	1828	56	5	227557	1	1	1	938.999	1875.98	2	1875.89	0.0936	0	79.58	23	32	1.1e-06	K	TYFPHFNLSHGSDQVK	A
3	gi|350581842	PREDICTED: hemoglobin subunit alpha-like isoform 1 [Sus scrofa]	1828	56	5	227562	1	1	1	939.018	1876.02	2	1875.89	0.1312	0	68.67	23	32	1.3e-05	K	TYFPHFNLSHGSDQVK	A
3	gi|350581842	PREDICTED: hemoglobin subunit alpha-like isoform 1 [Sus scrofa]	1828	56	5	227571	1	1	1	939.037	1876.06	2	1875.89	0.168	0	72.38	25	32	5.7e-06	K	TYFPHFNLSHGSDQVK	A
3	gi|350581842	PREDICTED: hemoglobin subunit alpha-like isoform 1 [Sus scrofa]	1828	56	5	227579	1	1	1	939.052	1876.09	2	1875.89	0.1998	0	73.96	25	32	4e-06	K	TYFPHFNLSHGSDQVK	A
3	gi|350581842	PREDICTED: hemoglobin subunit alpha-like isoform 1 [Sus scrofa]	1828	56	5	227585	1	1	1	626.376	1876.11	3	1875.89	0.2149	0	33.85	21	32	0.041	K	TYFPHFNLSHGSDQVK	A
3	gi|350581842	PREDICTED: hemoglobin subunit alpha-like isoform 1 [Sus scrofa]	1828	56	5	227599	1	1	1	626.419	1876.24	3	1875.89	0.3457	0	18.35	19	32	1.4	K	TYFPHFNLSHGSDQVK	A
3	gi|350581842	PREDICTED: hemoglobin subunit alpha-like isoform 1 [Sus scrofa]	1828	56	5	227624	1	1	1	939.202	1876.39	2	1875.89	0.4984	0	66.35	25	31	1.8e-05	K	TYFPHFNLSHGSDQVK	A
3	gi|350581842	PREDICTED: hemoglobin subunit alpha-like isoform 1 [Sus scrofa]	1828	56	5	227629	1	1	1	626.479	1876.42	3	1875.89	0.526	0	32.05	18	31	0.046	K	TYFPHFNLSHGSDQVK	A
3	gi|350581842	PREDICTED: hemoglobin subunit alpha-like isoform 1 [Sus scrofa]	1828	56	5	227686	1	1	1	626.574	1876.7	3	1875.89	0.8095	0	29.39	17	33	0.12	K	TYFPHFNLSHGSDQVK	A
3	gi|350581842	PREDICTED: hemoglobin subunit alpha-like isoform 1 [Sus scrofa]	1828	56	5	227687	1	1	1	626.576	1876.71	3	1875.89	0.8158	0	33.42	23	33	0.046	K	TYFPHFNLSHGSDQVK	A
3	gi|350581842	PREDICTED: hemoglobin subunit alpha-like isoform 1 [Sus scrofa]	1828	56	5	227696	1	1	1	626.594	1876.76	3	1875.89	0.871	0	34.96	19	33	0.032	K	TYFPHFNLSHGSDQVK	A
3	gi|350581842	PREDICTED: hemoglobin subunit alpha-like isoform 1 [Sus scrofa]	1828	56	5	227704	1	1	1	626.606	1876.8	3	1875.89	0.9067	0	29.17	16	33	0.12	K	TYFPHFNLSHGSDQVK	A
3	gi|350581842	PREDICTED: hemoglobin subunit alpha-like isoform 1 [Sus scrofa]	1828	56	5	227707	1	1	1	626.621	1876.84	3	1875.89	0.9511	0	28.24	22	33	0.15	K	TYFPHFNLSHGSDQVK	A
3	gi|350581842	PREDICTED: hemoglobin subunit alpha-like isoform 1 [Sus scrofa]	1828	56	5	227720	1	1	1	626.646	1876.92	3	1875.89	1.0255	0	31.67	25	33	0.069	K	TYFPHFNLSHGSDQVK	A
3	gi|350581842	PREDICTED: hemoglobin subunit alpha-like isoform 1 [Sus scrofa]	1828	56	5	227722	1	1	1	626.655	1876.94	3	1875.89	1.054	0	34.2	23	33	0.038	K	TYFPHFNLSHGSDQVK	A
3	gi|350581842	PREDICTED: hemoglobin subunit alpha-like isoform 1 [Sus scrofa]	1828	56	5	227723	1	1	1	626.656	1876.94	3	1875.89	1.0546	0	24.04	21	33	0.4	K	TYFPHFNLSHGSDQVK	A
3	gi|350581842	PREDICTED: hemoglobin subunit alpha-like isoform 1 [Sus scrofa]	1828	56	5	227733	1	1	1	939.524	1877.03	2	1875.89	1.144	0	66.49	22	33	2.3e-05	K	TYFPHFNLSHGSDQVK	A
3	gi|350581842	PREDICTED: hemoglobin subunit alpha-like isoform 1 [Sus scrofa]	1828	56	5	227755	1	1	1	626.747	1877.22	3	1875.89	1.3282	0	20.85	16	32	0.81	K	TYFPHFNLSHGSDQVK	A
3	gi|350581842	PREDICTED: hemoglobin subunit alpha-like isoform 1 [Sus scrofa]	1828	56	5	227759	1	1	1	626.755	1877.24	3	1875.89	1.3513	0	30.46	18	32	0.087	K	TYFPHFNLSHGSDQVK	A
4	gi|47523946	hemoglobin subunit epsilon [Sus scrofa]	803	34	2	120844	2	0	1	575.93	1149.84	2	1149.69	0.1577	0	17.35	22	35	3	K	LVAGVATALAHK	Y
4	gi|47523946	hemoglobin subunit epsilon [Sus scrofa]	803	34	2	137525	2	1	1	419.023	1254.05	3	1253.61	0.4404	1	14.36	28	33	4.2	K	NMDNLKGTFAK	L
4	gi|47523946	hemoglobin subunit epsilon [Sus scrofa]	803	34	2	140253	1	0	0	637.394	1272.77	2	1273.72	-0.945	0	17.5	23	34	2.7	R	LLVVYPWTQR	F
4	gi|47523946	hemoglobin subunit epsilon [Sus scrofa]	803	34	2	140319	1	0	0	637.48	1272.95	2	1273.72	-0.7728	0	24	23	34	0.6	R	LLVVYPWTQR	F
4	gi|47523946	hemoglobin subunit epsilon [Sus scrofa]	803	34	2	140365	1	0	0	637.558	1273.1	2	1273.72	-0.6162	0	19.09	32	33	1.4	R	LLVVYPWTQR	F
4	gi|47523946	hemoglobin subunit epsilon [Sus scrofa]	803	34	2	140400	1	0	0	637.614	1273.21	2	1273.72	-0.5052	0	17.52	27	33	2.1	R	LLVVYPWTQR	F
4	gi|47523946	hemoglobin subunit epsilon [Sus scrofa]	803	34	2	140405	1	0	0	637.618	1273.22	2	1273.72	-0.4964	0	23.51	23	33	0.55	R	LLVVYPWTQR	F
4	gi|47523946	hemoglobin subunit epsilon [Sus scrofa]	803	34	2	140406	1	0	0	637.623	1273.23	2	1273.72	-0.487	0	32.3	24	33	0.074	R	LLVVYPWTQR	F
4	gi|47523946	hemoglobin subunit epsilon [Sus scrofa]	803	34	2	140425	1	0	0	637.692	1273.37	2	1273.72	-0.3488	0	14.8	16	34	5.2	R	LLVVYPWTQR	F
4	gi|47523946	hemoglobin subunit epsilon [Sus scrofa]	803	34	2	140431	1	0	0	637.705	1273.39	2	1273.72	-0.3232	0	19.01	23	34	2	R	LLVVYPWTQR	F
4	gi|47523946	hemoglobin subunit epsilon [Sus scrofa]	803	34	2	140433	1	0	0	637.707	1273.4	2	1273.72	-0.3184	0	34.08	28	34	0.061	R	LLVVYPWTQR	F
4	gi|47523946	hemoglobin subunit epsilon [Sus scrofa]	803	34	2	140437	1	0	0	1274.45	1273.44	1	1273.72	-0.2796	0	16.2	14	34	3.8	R	LLVVYPWTQR	F
4	gi|47523946	hemoglobin subunit epsilon [Sus scrofa]	803	34	2	140449	1	0	0	1274.51	1273.5	1	1273.72	-0.2166	0	20.14	21	34	1.5	R	LLVVYPWTQR	F
4	gi|47523946	hemoglobin subunit epsilon [Sus scrofa]	803	34	2	140451	1	0	0	637.771	1273.53	2	1273.72	-0.191	0	41.82	26	34	0.01	R	LLVVYPWTQR	F
4	gi|47523946	hemoglobin subunit epsilon [Sus scrofa]	803	34	2	140453	1	0	0	637.773	1273.53	2	1273.72	-0.1876	0	49.17	26	34	0.0019	R	LLVVYPWTQR	F
4	gi|47523946	hemoglobin subunit epsilon [Sus scrofa]	803	34	2	140454	1	0	0	637.782	1273.55	2	1273.72	-0.1686	0	53.31	27	34	0.00073	R	LLVVYPWTQR	F
4	gi|47523946	hemoglobin subunit epsilon [Sus scrofa]	803	34	2	140461	1	0	0	637.802	1273.59	2	1273.72	-0.1292	0	52.67	27	34	0.00085	R	LLVVYPWTQR	F
4	gi|47523946	hemoglobin subunit epsilon [Sus scrofa]	803	34	2	140467	1	0	0	637.814	1273.61	2	1273.72	-0.105	0	41.26	26	34	0.012	R	LLVVYPWTQR	F
4	gi|47523946	hemoglobin subunit epsilon [Sus scrofa]	803	34	2	140470	1	0	0	637.823	1273.63	2	1273.72	-0.086	0	48.98	26	34	0.002	R	LLVVYPWTQR	F
4	gi|47523946	hemoglobin subunit epsilon [Sus scrofa]	803	34	2	140483	1	0	0	637.851	1273.69	2	1273.72	-0.0302	0	47.95	28	34	0.0025	R	LLVVYPWTQR	F
4	gi|47523946	hemoglobin subunit epsilon [Sus scrofa]	803	34	2	140506	1	0	0	637.97	1273.93	2	1273.72	0.2078	0	43.6	26	34	0.0068	R	LLVVYPWTQR	F
4	gi|47523946	hemoglobin subunit epsilon [Sus scrofa]	803	34	2	140518	1	0	0	638.018	1274.02	2	1273.72	0.3036	0	40.25	26	34	0.013	R	LLVVYPWTQR	F
4	gi|47523946	hemoglobin subunit epsilon [Sus scrofa]	803	34	2	140519	1	0	0	638.04	1274.06	2	1273.72	0.3464	0	46.8	26	34	0.0026	R	LLVVYPWTQR	F
4	gi|47523946	hemoglobin subunit epsilon [Sus scrofa]	803	34	2	140532	1	0	0	638.067	1274.12	2	1273.72	0.4008	0	40.64	25	33	0.0096	R	LLVVYPWTQR	F
4	gi|47523946	hemoglobin subunit epsilon [Sus scrofa]	803	34	2	140534	1	0	0	638.071	1274.13	2	1273.72	0.4086	0	29.68	17	33	0.12	R	LLVVYPWTQR	F
4	gi|47523946	hemoglobin subunit epsilon [Sus scrofa]	803	34	2	140535	1	0	0	638.071	1274.13	2	1273.72	0.4092	0	40.43	25	33	0.01	R	LLVVYPWTQR	F
4	gi|47523946	hemoglobin subunit epsilon [Sus scrofa]	803	34	2	140537	1	0	0	638.078	1274.14	2	1273.72	0.4224	0	40.4	26	33	0.0099	R	LLVVYPWTQR	F
4	gi|47523946	hemoglobin subunit epsilon [Sus scrofa]	803	34	2	140538	1	0	0	638.082	1274.15	2	1273.72	0.4308	0	22.4	23	33	0.62	R	LLVVYPWTQR	F
4	gi|47523946	hemoglobin subunit epsilon [Sus scrofa]	803	34	2	140544	1	0	0	638.099	1274.18	2	1273.72	0.4648	0	31.71	19	33	0.074	R	LLVVYPWTQR	F
4	gi|47523946	hemoglobin subunit epsilon [Sus scrofa]	803	34	2	140554	1	0	0	638.123	1274.23	2	1273.72	0.513	0	39.62	24	33	0.013	R	LLVVYPWTQR	F
4	gi|47523946	hemoglobin subunit epsilon [Sus scrofa]	803	34	2	140565	1	0	0	638.166	1274.32	2	1273.72	0.5988	0	40.44	27	34	0.014	R	LLVVYPWTQR	F
4	gi|47523946	hemoglobin subunit epsilon [Sus scrofa]	803	34	2	140566	1	0	0	638.168	1274.32	2	1273.72	0.6042	0	29.45	25	34	0.17	R	LLVVYPWTQR	F
4	gi|47523946	hemoglobin subunit epsilon [Sus scrofa]	803	34	2	140576	1	0	0	638.208	1274.4	2	1273.72	0.684	0	40.6	28	34	0.014	R	LLVVYPWTQR	F
4	gi|47523946	hemoglobin subunit epsilon [Sus scrofa]	803	34	2	140604	1	0	0	638.378	1274.74	2	1273.72	1.0234	0	43.45	27	34	0.0071	R	LLVVYPWTQR	F
[truncated: 875 more rows]

## Sheet: invivo_EHEC_100419_Protein
Prot ID	Accession	Description	Mascot Score	# PSMs	# Peptides	Pr Coverage	Pr Length	MW (kDa)	pI
[truncated: 46 more rows]

[truncated: 12 more sheets: invivo_EHEC_100419_psms, invivo_EHEC_100710_Protein, invivo_EHEC_100710_psms, invivo_EHEC_100718_Protein, invivo_EHEC_100718_psms, invitro_EHEC_090924_Protein, invitro_EHEC_090924_psms, invitro_EHEC_100106_Protein, invitro_EHEC_100106_psms, invitro_EHEC_100504_Protein, 2DLCEC8624100504_psms, Sheet1]
